# Supplementary material for: A statistical framework for assessing pharmacological response and biomarkers using uncertainty estimates
Source: bioRxiv preprint, doi:10.1101/2020.05.01.072983, version 3 (2020-06-21)
Supplement: Supplementary Table 1 [file 072983_file03.xlsx]

## Sheet: legend
	Table S1 - summary of pharmacogenomic interactions
	Legend
	Status	.= 3 levels, namely Established biomarkers (incl FDA approved), Sensitivity biomarkers (not validated) and Other pharmacogenomic interactions
	drug_id	.= unique Drug ID
	Drug_Name	.= Name of the Drug
	Target	.= Target of the Drug
	variant	.= Identified Variant (mutation or copy number variation (cna))
	TCGA	.= Cancer Type (TCGA tissue classification)
	nVariant	.= Number of cell lines where particular variant was found
	nTotal	.= Total number of cell lines within Cancer Type (TCGA)
	pVal.GP	.= p value (GP curve fitting)
	qVal.GP	.= BH adjusted p value (GP curve fitting)
	eff.GP	.= effect size (GP curve fitting)
	sign_q_GP	.= log10 of signed and multiple testing adjusted p value (signed = the sign/direction of the effect size, BH correction; GP curve fitting)
	pVal.sigmoid	.= p value (sigmoid curve fitting)
	qVal.sigmoid	.= BH adjusted p value (sigmoid curve fitting)
	eff.sigmoid	.= effect size (sigmoid curve fitting)
	sign_q_sigmoid	.= log10 of signed and multiple testing adusted p value (signed = the sign/direction of the effect size; BH correction; sigmoid curve fitting)

## Sheet: data_table
Status	drug_id	Drug_Name	Target	variant	TCGA	nVariant	nTotal	pVal.GP	qVal.GP	eff.GP	sign_q_GP	pVal.sigmoid	qVal.sigmoid	eff.sigmoid	sign_q_sigmoid
Established biomarkers (incl FDA approved)	1377	Afatinib	ERBB2, EGFR	gain:cnaBRCA26 (CDK12,ERBB2,MED24)	BRCA	15	47	8.23974e-11	4.11987e-09	-2.62141	8.38512	2.32864e-09	1.16432e-07	-2.33676	6.93393
Established biomarkers (incl FDA approved)	1032	Afatinib	ERBB2, EGFR	EGFR_mut	LUAD	4	52	1.67587e-08	6.20071e-07	-3.52969	6.20756	5.73601e-08	2.12232e-06	-3.38873	5.67319
Established biomarkers (incl FDA approved)	1373	Dabrafenib	BRAF	BRAF_mut	SKCM	35	45	3.46244e-07	7.61738e-06	-2.1949	5.11819	2.26607e-07	4.98536e-06	-2.29167	5.3023
Established biomarkers (incl FDA approved)	1010	Gefitinib	EGFR	EGFR_mut	LUAD	5	53	9.18335e-07	3.39784e-05	-2.70229	4.4688	2.22515e-07	8.23306e-06	-2.82369	5.08444
Established biomarkers (incl FDA approved)	282	Pelitinib	EGFR	EGFR_mut	LUAD	5	61	2.34407e-06	9.84509e-05	-2.55674	4.00678	1.53398e-06	6.44272e-05	-2.63537	4.19093
Established biomarkers (incl FDA approved)	136	Mitomycin-C	DNA crosslinker	TP53_mut	BLCA	15	19	1.11788e-05	0.000134146	-3.55233	3.87242	0.00014288	0.00171457	-2.83989	2.76585
Established biomarkers (incl FDA approved)	1498	Selumetinib	MEK1, MEK2	KRAS_mut	LUAD	20	62	3.24392e-06	0.000136245	-1.28356	3.86568	1.46709e-06	6.16178e-05	-1.3387	4.21029
Established biomarkers (incl FDA approved)	326	GSK690693	AKT1, AKT2, AKT3	PTEN_mut	COREAD	6	46	4.10929e-06	0.000180809	-2.73711	3.74278	0.000151765	0.0133553	-2.39768	1.87435
Established biomarkers (incl FDA approved)	326	GSK690693	AKT1, AKT2, AKT3	PIK3CA_mut	OV	6	32	4.97407e-06	0.000313366	-2.46182	3.50395	2.5606e-05	0.00161318	-2.69346	2.79232
Established biomarkers (incl FDA approved)	1526	Refametinib	MEK1, MEK2	KRAS_mut	LUAD	20	60	1.23801e-05	0.000519962	-1.27638	3.28403	9.16071e-07	3.8475e-05	-1.46216	4.41482
Established biomarkers (incl FDA approved)	1373	Dabrafenib	BRAF	BRAF_mut	THCA	7	16	0.000228447	0.00068534	-2.79446	3.16409	5.03835e-05	0.00015115	-3.26123	3.82059
Established biomarkers (incl FDA approved)	1371	PLX-4720	BRAF	BRAF_mut	SKCM	41	54	5.53924e-05	0.00132942	-1.4994	2.87634	1.9769e-05	0.000474457	-1.5572	3.3238
Established biomarkers (incl FDA approved)	1377	Afatinib	ERBB2, EGFR	EGFR_mut	LUAD	4	58	5.73605e-05	0.00235178	-2.35318	2.6286	5.47e-06	0.00022427	-2.71971	3.64923
Established biomarkers (incl FDA approved)	1032	Afatinib	ERBB2, EGFR	gain:cnaBRCA26 (CDK12,ERBB2,MED24)	BRCA	15	45	5.30949e-05	0.00249546	-1.38594	2.60285	2.66854e-05	0.00125421	-1.45928	2.90163
Established biomarkers (incl FDA approved)	1372	Trametinib	MEK1, MEK2	KRAS_mut	LUAD	20	60	8.64997e-05	0.00363299	-1.0804	2.43974	2.31402e-05	0.000971887	-1.15071	3.01238
Established biomarkers (incl FDA approved)	119	Lapatinib	ERBB2, EGFR	gain:cnaBRCA26 (CDK12,ERBB2,MED24)	BRCA	4	13	0.000549255	0.00466867	-3.42368	2.33081	0.000572972	0.00487026	-3.31802	2.31245
Established biomarkers (incl FDA approved)	1036	PLX-4720	BRAF	BRAF_mut	SKCM	33	43	0.00439741	0.0461728	-1.14984	1.33561	0.00115206	0.014206	-1.33526	1.84753
Established biomarkers (incl FDA approved)	1014	Refametinib	MEK1, MEK2	KRAS_mut	LUAD	17	54	0.0457631	0.474286	-0.626219	0.32396	0.00148312	0.0533922	-1.02559	1.27252
Established biomarkers (incl FDA approved)	1062	Selumetinib	MEK1, MEK2	KRAS_mut	LUAD	15	50	0.080874	0.695873	-0.428258	0.15747	0.0415077	0.737794	-0.587561	0.132065
Established biomarkers (incl FDA approved)	1054	Palbociclib	CDK4, CDK6	RB1_mut	LGG	5	14	0.00639807	0.0383884	1.98442	-1.4158	4.27713e-05	0.000256628	3.83199	-3.5907
Established biomarkers (incl FDA approved)	1047	Nutlin-3a (-)	MDM2	TP53_mut	GBM	19	33	0.000175941	0.00545419	1.61061	-2.26327	0.000379856	0.0117755	1.52834	-1.92902
Established biomarkers (incl FDA approved)	1047	Nutlin-3a (-)	MDM2	TP53_mut	OV	23	33	6.26035e-05	0.00413183	1.73842	-2.38386	1.80256e-05	0.00118969	1.75792	-2.92457
Established biomarkers (incl FDA approved)	1373	Dabrafenib	BRAF	NRAS_mut	SKCM	8	45	4.04764e-05	0.000445241	1.79759	-3.35141	1.90754e-05	0.00020983	1.9419	-3.67813
Established biomarkers (incl FDA approved)	1047	Nutlin-3a (-)	MDM2	TP53_mut	SKCM	14	43	2.10676e-05	0.000442419	1.58261	-3.35417	5.10147e-06	0.000107131	1.79422	-3.97009
Established biomarkers (incl FDA approved)	1047	Nutlin-3a (-)	MDM2	TP53_mut	LAML	12	23	5.47199e-07	2.736e-06	3.28742	-5.56288	4.97764e-06	2.48882e-05	2.86348	-4.60401
Established biomarkers (incl FDA approved)	1047	Nutlin-3a (-)	MDM2	TP53_mut	DLBC	19	32	1.87685e-13	1.50148e-12	5.01792	-11.8235	3.21172e-07	2.56938e-06	2.6886	-5.59017
Sensitivity biomarkers (not validated)	119	Lapatinib	ERBB2, EGFR	gain:cnaBRCA27 (CLTC,PPM1D)	BRCA	3	13	2.257e-07	3.8369e-06	-7.61675	5.41602	5.04762e-06	8.58096e-05	-5.72615	4.06646
Sensitivity biomarkers (not validated)	1019	Bosutinib	SRC, ABL, TEC	EGFR_mut	LUAD	5	53	1.36492e-07	5.05019e-06	-3.04466	5.29669	4.07394e-06	0.000150736	-2.56227	3.82178
Sensitivity biomarkers (not validated)	1042	Doramapimod	p38, JNK2	ARID2_mut	SKCM	3	43	1.27704e-06	2.68178e-05	-1.81604	4.57158	1.25841e-07	2.64266e-06	-2.48398	5.57796
Sensitivity biomarkers (not validated)	1248	Daporinad	NAMPT	gain:cnaLGG16 (EGFR)	LGG	5	17	2.37544e-05	0.000166281	-3.34013	3.77916	1.12647e-05	7.88526e-05	-3.60213	4.10318
Sensitivity biomarkers (not validated)	1011	Navitoclax	BCL2, BCL-XL, BCL-W	loss:cnaBRCA34	BRCA	5	43	8.22705e-06	0.000386671	-2.13966	3.41266	6.96439e-06	0.000327326	-2.15349	3.48502
Sensitivity biomarkers (not validated)	1011	Navitoclax	BCL2, BCL-XL, BCL-W	gain:cnaCOREAD51 (MET)	COREAD	3	41	2.41167e-05	0.000928491	-2.66083	3.03222	1.49365e-06	0.000115011	-2.75136	3.93926
Other pharmacogenomic interactions	263	FR-180204	ERK1, ERK2	EGFR_mut	LUAD	5	61	2.5471e-08	1.06978e-06	-3.08658	5.97071	4.89117e-05	0.00205429	-2.1694	2.68734
Other pharmacogenomic interactions	1013	Nilotinib	ABL	loss:cnaBRCA33	BRCA	5	40	3.72299e-07	1.74981e-05	-3.30946	4.75701	0.00627268	0.290043	-1.65262	0.537538
Other pharmacogenomic interactions	1199	Tamoxifen	ESR1	EGFR_mut	ESCA	3	34	2.38384e-06	3.81414e-05	-3.91969	4.4186	0.0129658	0.207453	-1.76023	0.68308
Other pharmacogenomic interactions	135	Gemcitabine	Pyrimidine antimetabolite	TP53_mut	BLCA	15	19	3.9472e-06	4.73664e-05	-3.96544	4.32453	0.00107346	0.0128815	-2.31422	1.89003
Other pharmacogenomic interactions	134	Etoposide	TOP2	TP53_mut	BLCA	15	19	1.32934e-05	0.00015952	-3.55438	3.79718	0.00121976	0.0146371	-2.22712	1.83454
Other pharmacogenomic interactions	89	Parthenolide	HDAC1	RB1_mut	LGG	5	11	2.89996e-05	0.000173998	-4.64036	3.75946	0.000682783	0.0040967	-2.99779	2.38757
Other pharmacogenomic interactions	326	GSK690693	AKT1, AKT2, AKT3	CNOT1_mut	COREAD	3	46	2.6983e-06	0.000180809	-3.73284	3.74278	0.00130298	0.0382207	-2.46693	1.4177
Other pharmacogenomic interactions	87	GW843682X	PLK1	loss:cnaSTAD16	STAD	3	7	0.000120023	0.000240047	-0.705992	3.6197	0.000570458	0.00114092	-0.649212	2.94275
Other pharmacogenomic interactions	326	GSK690693	AKT1, AKT2, AKT3	CLSPN_mut	COREAD	3	46	8.50547e-06	0.000249494	-3.11394	3.60294	0.00208223	0.0446696	-1.92064	1.34999
Other pharmacogenomic interactions	1060	PD0325901	MEK1, MEK2	loss:cnaDLBC2	DLBC	3	32	4.57619e-05	0.000366095	-2.95049	3.43641	0.0253165	0.202532	-1.3948	0.693506
Other pharmacogenomic interactions	282	Pelitinib	EGFR	PIK3CA_mut	OV	6	32	7.00985e-06	0.000441621	-2.60228	3.35495	0.0018021	0.113532	-1.77245	0.94488
Other pharmacogenomic interactions	260	NG-25	TAK1, MAP4K2	loss:cnaSTAD13	STAD	11	21	2.69123e-05	0.000592071	-2.84661	3.22763	0.00397222	0.0724162	-1.76176	1.14016
Other pharmacogenomic interactions	229	Enzastaurin	PKCB	BCOR_mut	STAD	3	21	2.77277e-05	0.00061001	-3.9752	3.21466	0.000284021	0.00624847	-3.50358	2.20423
Other pharmacogenomic interactions	277	Linifanib	VEGFR1, VEGFR2, VEGFR3, CSF1R, FLT3, KIT	ATRX_mut	COREAD	3	46	7.67116e-06	0.000675062	-3.37373	3.17066	4.92025e-05	0.00432982	-3.13395	2.36353
Other pharmacogenomic interactions	1060	PD0325901	MEK1, MEK2	KRAS_mut	LUAD	17	54	1.90867e-05	0.000687122	-1.36485	3.16297	0.000542405	0.0195266	-1.0987	1.70937
Other pharmacogenomic interactions	1028	VX-702	p38	CEP290_mut	COREAD	3	43	1.14487e-05	0.000915892	-3.19014	3.03816	0.0260312	0.519065	-1.58482	0.284778
Other pharmacogenomic interactions	1011	Navitoclax	BCL2, BCL-XL, BCL-W	gain:cnaCOREAD31	COREAD	5	41	2.30558e-05	0.000928491	-2.45743	3.03222	2.63925e-05	0.00101611	-2.17029	2.99306
Other pharmacogenomic interactions	1042	Doramapimod	p38, JNK2	ARID1A_mut	COREAD	8	41	1.32412e-05	0.00101957	-1.99929	2.99158	0.0510888	0.55667	-1.17633	0.254402
Other pharmacogenomic interactions	1218	JQ1	BRD2, BRD3, BRD4, BRDT	EGFR_mut	ESCA	3	33	7.09779e-05	0.00113565	-2.98537	2.94476	0.0670088	0.742462	-1.27591	0.129326
Other pharmacogenomic interactions	230	GSK429286A	ROCK1, ROCK2	MLL3_mut	BRCA	3	49	2.24722e-05	0.00114608	-2.53986	2.94078	0.000401025	0.0204523	-1.69701	1.68926
Other pharmacogenomic interactions	326	GSK690693	AKT1, AKT2, AKT3	MAP2K4_mut	COREAD	5	46	5.80814e-05	0.00127779	-2.59013	2.89354	0.000496892	0.0218633	-2.29833	1.66028
Other pharmacogenomic interactions	186	Bexarotene	Retinioic X receptor (RXR) agonist	SETD2_mut	KIRC	4	22	8.00073e-05	0.00136012	-2.57483	2.86642	0.0390045	0.18841	-1.28117	0.724896
Other pharmacogenomic interactions	176	IPA-3	PAK1	RB1_mut	LGG	6	16	0.000207445	0.00145212	-2.73079	2.838	0.00564183	0.0284158	-1.77341	1.54644
Other pharmacogenomic interactions	1054	Palbociclib	CDK4, CDK6	loss:cnaLIHC7 (CDKN2A)	LIHC	4	14	0.000520947	0.00156284	-1.97883	2.80608	0.00683019	0.0204906	-1.66955	1.68845
Other pharmacogenomic interactions	326	GSK690693	AKT1, AKT2, AKT3	CDK12_mut	COREAD	3	46	9.58414e-05	0.00168681	-3.04045	2.77293	0.0313374	0.229807	-1.77363	0.638636
Other pharmacogenomic interactions	290	KIN001-260	IKKB	CDKN2A_mut	PAAD	4	29	0.000195093	0.00175584	-2.14075	2.75552	0.11187	0.598353	-0.825279	0.223043
Other pharmacogenomic interactions	341	Selisistat	SIRT1	STK11_mut	LUAD	11	61	4.38244e-05	0.00184063	-1.55192	2.73503	0.00556608	0.233775	-1.07245	0.631201
Other pharmacogenomic interactions	56	WH-4-023	SRC, LCK	gain:cnaSTAD26 (MYC)	STAD	3	7	0.000461739	0.00184695	-9.1846	2.73354	0.000976459	0.00390584	-4.87501	2.40829
Other pharmacogenomic interactions	1029	Motesanib	VEGFR, RET, KIT, PDGFR	ARID2_mut	SKCM	3	43	9.05743e-05	0.00190206	-1.67745	2.72078	0.000397746	0.00835267	-1.72814	2.07817
Other pharmacogenomic interactions	309	Y-39983	ROCK	BRAF_mut	THCA	7	16	0.000635895	0.00190768	-1.19647	2.71949	0.0600898	0.180269	-1.16984	0.744078
Other pharmacogenomic interactions	1049	PD173074	FGFR1, FGFR3	gain:cnaSKCM21 (FOXP1,MITF)	SKCM	7	43	9.40428e-05	0.0019749	-1.68918	2.70446	0.0216169	0.247561	-0.89939	0.606318
Other pharmacogenomic interactions	186	Bexarotene	Retinioic X receptor (RXR) agonist	LARP4B_mut	UCEC	3	9	0.000150463	0.00210649	-6.92596	2.67644	0.00536647	0.0751305	-3.12303	1.12418
Other pharmacogenomic interactions	275	I-BET-762	BRD2, BRD3, BRD4	loss:cnaESCA1	ESCA	6	35	0.000135911	0.00217457	-3.08139	2.66263	0.00927475	0.148396	-2.06928	0.828578
Other pharmacogenomic interactions	256	JW-7-24-1	LCK	PTEN_mut	UCEC	6	9	0.000321421	0.00224995	-1.02381	2.64783	0.0259956	0.181969	-1.46739	0.740001
Other pharmacogenomic interactions	196	Phenformin	Biguanide agent	MKL1_mut	UCEC	3	9	0.000336566	0.00235596	-1.6465	2.62783	0.0294983	0.206488	-1.1949	0.685105
Other pharmacogenomic interactions	1011	Navitoclax	BCL2, BCL-XL, BCL-W	loss:cnaBRCA33	BRCA	5	43	0.000109238	0.00256709	-1.87636	2.59056	0.000223098	0.00524281	-1.71875	2.28044
Other pharmacogenomic interactions	134	Etoposide	TOP2	TP53_mut	THCA	11	16	0.000879905	0.00263971	-1.2989	2.57844	0.00920125	0.0276038	-0.946818	1.55903
Other pharmacogenomic interactions	1218	JQ1	BRD2, BRD3, BRD4, BRDT	NF1_mut	LGG	3	17	0.000382479	0.00267735	-1.92824	2.57229	0.0198037	0.138626	-1.57615	0.858156
Other pharmacogenomic interactions	255	CP724714	ERBB2	gain:cnaBRCA26 (CDK12,ERBB2,MED24)	BRCA	14	48	6.19997e-05	0.00297598	-1.31083	2.52637	1.57731e-06	7.57109e-05	-1.61317	4.12084
Other pharmacogenomic interactions	192	LFM-A13	BTK	ARID2_mut	COREAD	3	38	4.18626e-05	0.00309783	-3.1295	2.50894	0.0126844	0.469323	-1.96825	0.328528
Other pharmacogenomic interactions	258	STF-62247	Autophagy inducer	loss:cnaKIRC12	KIRC	11	30	0.000654642	0.00310955	-1.58334	2.5073	0.00251998	0.0119699	-1.16581	1.92191
Other pharmacogenomic interactions	258	STF-62247	Autophagy inducer	loss:cnaKIRC13	KIRC	11	30	0.000654642	0.00310955	-1.58334	2.5073	0.00251998	0.0119699	-1.16581	1.92191
Other pharmacogenomic interactions	258	STF-62247	Autophagy inducer	loss:cnaKIRC14	KIRC	11	30	0.000654642	0.00310955	-1.58334	2.5073	0.00251998	0.0119699	-1.16581	1.92191
Other pharmacogenomic interactions	258	STF-62247	Autophagy inducer	loss:cnaKIRC15	KIRC	11	30	0.000654642	0.00310955	-1.58334	2.5073	0.00251998	0.0119699	-1.16581	1.92191
Other pharmacogenomic interactions	328	SNX-2112	HSP90	loss:cnaKIRC12	KIRC	12	30	0.000746867	0.00313684	-0.849922	2.50351	0.0187733	0.0788479	-0.554309	1.10321
Other pharmacogenomic interactions	328	SNX-2112	HSP90	loss:cnaKIRC13	KIRC	12	30	0.000746867	0.00313684	-0.849922	2.50351	0.0187733	0.0788479	-0.554309	1.10321
Other pharmacogenomic interactions	328	SNX-2112	HSP90	loss:cnaKIRC14	KIRC	12	30	0.000746867	0.00313684	-0.849922	2.50351	0.0187733	0.0788479	-0.554309	1.10321
Other pharmacogenomic interactions	328	SNX-2112	HSP90	loss:cnaKIRC15	KIRC	12	30	0.000746867	0.00313684	-0.849922	2.50351	0.0187733	0.0788479	-0.554309	1.10321
Other pharmacogenomic interactions	328	SNX-2112	HSP90	loss:cnaKIRC16	KIRC	6	30	0.000623319	0.00313684	-1.43518	2.50351	0.00674844	0.0788479	-1.11843	1.10321
Other pharmacogenomic interactions	258	STF-62247	Autophagy inducer	loss:cnaBRCA25 (ARID1B,MAP3K4,MLLT4)	BRCA	6	49	7.14723e-05	0.00364509	-1.37472	2.43829	0.000176631	0.00887018	-1.12426	2.05207
Other pharmacogenomic interactions	30	Sorafenib	PDGFR, KIT, VEGFR, RAF	loss:cnaCOREAD19	COREAD	4	15	0.000140517	0.00365345	-3.31185	2.4373	0.000439244	0.0114203	-2.35339	1.94232
Other pharmacogenomic interactions	1066	AZD6482	PI3Kbeta	gain:cnaPAAD3	PAAD	4	30	0.000406026	0.00365424	-2.37287	2.4372	0.00546094	0.0491485	-1.82161	1.30849
Other pharmacogenomic interactions	1011	Navitoclax	BCL2, BCL-XL, BCL-W	loss:cnaLGG14 (CUL2)	LGG	4	15	0.000617732	0.00370639	-2.17774	2.43105	0.00358419	0.0215051	-1.84562	1.66746
Other pharmacogenomic interactions	290	KIN001-260	IKKB	BRAF_mut	THCA	7	16	0.00124	0.00372	-1.34319	2.42946	0.0176961	0.0530883	-1.60176	1.275
Other pharmacogenomic interactions	1526	Refametinib	MEK1, MEK2	loss:cnaLUSC4	LUSC	7	15	0.000420039	0.00378035	-2.29244	2.42247	0.000737161	0.00663445	-1.96464	2.1782
Other pharmacogenomic interactions	254	Quizartinib	FLT3	loss:cnaGBM100	GBM	3	35	0.00106378	0.00390051	-2.24139	2.40888	0.00254171	0.00931961	-2.05953	2.0306
Other pharmacogenomic interactions	254	Quizartinib	FLT3	loss:cnaGBM102	GBM	3	35	0.00106378	0.00390051	-2.24139	2.40888	0.00254171	0.00931961	-2.05953	2.0306
Other pharmacogenomic interactions	254	Quizartinib	FLT3	loss:cnaGBM103	GBM	3	35	0.00106378	0.00390051	-2.24139	2.40888	0.00254171	0.00931961	-2.05953	2.0306
Other pharmacogenomic interactions	254	Quizartinib	FLT3	loss:cnaGBM104	GBM	3	35	0.00106378	0.00390051	-2.24139	2.40888	0.00254171	0.00931961	-2.05953	2.0306
Other pharmacogenomic interactions	254	Quizartinib	FLT3	loss:cnaGBM105	GBM	3	35	0.00106378	0.00390051	-2.24139	2.40888	0.00254171	0.00931961	-2.05953	2.0306
Other pharmacogenomic interactions	254	Quizartinib	FLT3	loss:cnaGBM106	GBM	3	35	0.00106378	0.00390051	-2.24139	2.40888	0.00254171	0.00931961	-2.05953	2.0306
Other pharmacogenomic interactions	254	Quizartinib	FLT3	loss:cnaGBM97	GBM	3	35	0.00106378	0.00390051	-2.24139	2.40888	0.00254171	0.00931961	-2.05953	2.0306
Other pharmacogenomic interactions	254	Quizartinib	FLT3	loss:cnaGBM98	GBM	3	35	0.00106378	0.00390051	-2.24139	2.40888	0.00254171	0.00931961	-2.05953	2.0306
Other pharmacogenomic interactions	254	Quizartinib	FLT3	loss:cnaGBM99 (ANK3)	GBM	3	35	0.00106378	0.00390051	-2.24139	2.40888	0.00254171	0.00931961	-2.05953	2.0306
Other pharmacogenomic interactions	1261	rTRAIL	TRAIL receptor agonist	KRAS_mut	LAML	3	26	0.000670875	0.00402525	-2.40967	2.39521	0.000838715	0.00503229	-2.30698	2.29823
Other pharmacogenomic interactions	1495	Olaparib	PARP1, PARP2	gain:cnaLGG16 (EGFR)	LGG	5	17	0.000594117	0.00415882	-2.2445	2.38103	0.000407856	0.00285499	-2.30363	2.5444
Other pharmacogenomic interactions	1061	SB590885	BRAF	BRAF_mut	SKCM	31	39	0.000281037	0.00425869	-1.52149	2.37072	0.000222648	0.00405643	-1.61461	2.39186
Other pharmacogenomic interactions	89	Parthenolide	HDAC1	loss:cnaSTAD13	STAD	3	7	0.00213386	0.00426771	-2.28114	2.3698	0.00414469	0.00828938	-2.16533	2.08148
Other pharmacogenomic interactions	45	Z-LLNle-CHO	gamma-secretase	loss:cnaSTAD16	STAD	3	7	0.00216627	0.00433254	-0.479076	2.36326	0.00678066	0.0135613	-0.23388	1.8677
Other pharmacogenomic interactions	1494	SN-38	TOP1	TP53_mut	PAAD	24	29	0.000505145	0.00454631	-1.82507	2.34234	0.00112581	0.0101323	-1.59905	1.99429
Other pharmacogenomic interactions	1261	rTRAIL	TRAIL receptor agonist	NRAS_mut	THCA	3	16	0.00163273	0.00489818	-1.80623	2.30996	0.0161765	0.0485294	-1.50646	1.314
Other pharmacogenomic interactions	332	XMD15-27	CAMK2	loss:cnaESCA1	ESCA	6	35	0.00030693	0.00491087	-1.54175	2.30884	0.00131467	0.0210347	-1.58483	1.67706
Other pharmacogenomic interactions	1036	PLX-4720	BRAF	EP300_mut	PAAD	3	23	0.00082282	0.00493692	-2.13552	2.30654	0.0519099	0.311459	-1.0497	0.506599
Other pharmacogenomic interactions	193	GW-2580	CSF1R	CDKN2A_mut	PAAD	4	29	0.000552032	0.00496829	-2.16441	2.30379	0.0399158	0.359243	-1.19282	0.444612
Other pharmacogenomic interactions	1008	Methotrexate	Antimetabolite	ARID1A_mut	OV	9	31	8.08625e-05	0.00509434	-1.25629	2.29291	0.0124543	0.196156	-0.992701	0.707399
Other pharmacogenomic interactions	1030	KU-55933	ATM	EP300_mut	BLCA	4	15	0.000494085	0.00543493	-2.66382	2.26481	0.0160651	0.126435	-1.66083	0.898134
Other pharmacogenomic interactions	197	Bryostatin 1	PKC	loss:cnaCOREAD28 (SOX9)	COREAD	3	38	7.40203e-05	0.0054775	-2.00993	2.26142	0.178304	0.931435	-0.304929	0.0308474
Other pharmacogenomic interactions	1018	Veliparib	PARP1, PARP2	gain:cnaLUAD32	LUAD	3	53	0.000150541	0.00557	-2.51723	2.25414	0.387325	0.8348	-0.570066	0.0784177
Other pharmacogenomic interactions	1036	PLX-4720	BRAF	BRAF_mut	THCA	6	14	0.0018895	0.0056685	-2.42974	2.24653	0.00087091	0.00261273	-2.75081	2.58291
Other pharmacogenomic interactions	1133	Serdemetan	MDM2	gain:cnaPAAD3	PAAD	4	30	0.000636067	0.0057246	-2.07443	2.24225	0.00121487	0.0109339	-1.72209	1.96123
Other pharmacogenomic interactions	303	PIK-93	PI3Kgamma	BRAF_mut	THCA	7	16	0.00193831	0.00581492	-2.16165	2.23546	0.00290186	0.00870558	-2.04399	2.0602
Other pharmacogenomic interactions	258	STF-62247	Autophagy inducer	MLL3_mut	BRCA	3	49	0.000230048	0.00586623	-1.37182	2.23164	0.00034785	0.00887018	-1.35948	2.05207
Other pharmacogenomic interactions	133	Doxorubicin	Anthracycline	TP53_mut	BLCA	15	19	0.000513501	0.00616201	-2.4994	2.21028	0.000960118	0.0115214	-2.31909	1.93849
Other pharmacogenomic interactions	1502	Bicalutamide	AR	BRAF_mut	THCA	6	14	0.00207843	0.0062353	-2.1038	2.20514	0.0039557	0.0118671	-1.96127	1.92566
Other pharmacogenomic interactions	1261	rTRAIL	TRAIL receptor agonist	loss:cnaPAAD4 (CDKN2A)	PAAD	16	27	0.000805382	0.00644305	-1.57947	2.19091	0.00184073	0.0147259	-1.41688	1.83192
Other pharmacogenomic interactions	333	T0901317	LXR, FXR	CDH1_mut	COREAD	3	45	7.54937e-05	0.00656795	-2.39801	2.18257	0.00344277	0.299521	-1.82697	0.523573
Other pharmacogenomic interactions	1047	Nutlin-3a (-)	MDM2	loss:cnaSKCM4 (BNC2,CDKN2A,JAK2,PSIP1)	SKCM	30	43	0.000639044	0.00670996	-1.27163	2.17328	0.000299198	0.00314157	-1.28602	2.50285
Other pharmacogenomic interactions	1203	QL-XII-61	BMX, BTK	SRGAP3_mut	COREAD	3	36	8.88075e-05	0.00692698	-2.58837	2.15946	0.0386906	0.381013	-1.18165	0.41906
Other pharmacogenomic interactions	1166	QL-VIII-58	MTOR, ATR	TP53_mut	BRCA	23	26	0.000217972	0.00719309	-2.59139	2.14308	0.00165665	0.0546694	-2.13293	1.26226
Other pharmacogenomic interactions	1149	TW 37	BCL2, BCL-XL, MCL1	TP53_mut	BLCA	15	19	0.000615465	0.00738558	-2.33803	2.13162	0.0218568	0.110377	-1.45509	0.957119
Other pharmacogenomic interactions	1047	Nutlin-3a (-)	MDM2	CTNNB1_mut	COREAD	6	41	0.000104163	0.00758329	-2.32689	2.12014	0.000715971	0.0275649	-1.98946	1.55964
Other pharmacogenomic interactions	1498	Selumetinib	MEK1, MEK2	RBM10_mut	LUAD	3	62	0.000373452	0.00784249	-2.18525	2.10555	0.000415261	0.00872047	-2.16491	2.05946
Other pharmacogenomic interactions	254	Quizartinib	FLT3	RNF43_mut	PAAD	4	29	0.00088611	0.00797499	-2.01744	2.09827	0.62765	0.881852	-0.364269	0.0546045
Other pharmacogenomic interactions	1039	SL0101	RSK, AURKB, PIM1, PIM3	TP53_mut	STAD	17	23	0.000363343	0.00835689	-1.56548	2.07796	0.408395	0.733693	-0.187878	0.134486
Other pharmacogenomic interactions	326	GSK690693	AKT1, AKT2, AKT3	NF1_mut	COREAD	7	46	0.000575233	0.00843674	-1.6415	2.07383	0.00253804	0.0446696	-1.49215	1.34999
Other pharmacogenomic interactions	312	Tivozanib	VEGFR1, VEGFR2, VEGFR3	RNF43_mut	COREAD	10	46	9.6769e-05	0.00851567	-1.22215	2.06978	0.0360542	0.634554	-1.29741	0.197531
Other pharmacogenomic interactions	206	Ruxolitinib	JAK1, JAK2	RB1_mut	LUAD	3	61	0.000205069	0.00861291	-2.70929	2.06485	0.0856335	0.845143	-1.42894	0.07307
Other pharmacogenomic interactions	1030	KU-55933	ATM	MLL2_mut	BLCA	3	15	0.0015811	0.00869606	-2.39997	2.06068	0.0229881	0.126435	-1.65121	0.898134
Other pharmacogenomic interactions	30	Sorafenib	PDGFR, KIT, VEGFR, RAF	RB1_mut	LGG	5	11	0.00146997	0.00881979	-2.89115	2.05454	0.00254075	0.0152445	-2.76906	1.81689
Other pharmacogenomic interactions	1194	SB-505124	ALK4, ALK5	ITSN1_mut	COREAD	3	49	9.81699e-05	0.00883529	-2.83579	2.05378	0.0289508	0.846133	-1.38625	0.0725615
Other pharmacogenomic interactions	1230	IOX2	EGLN1	PTEN_mut	BRCA	8	47	0.000181244	0.00906221	-1.43812	2.04277	0.000328506	0.0164253	-1.28573	1.78449
Other pharmacogenomic interactions	249	Cabozantinib	VEGFR, MET, RET, KIT, FLT1, FLT3, FLT4, TIE2,AXL	loss:cnaUCEC8 (SRGAP3)	UCEC	3	9	0.000668765	0.00936271	-3.7977	2.0286	0.00622605	0.0871647	-3.08759	1.05966
Other pharmacogenomic interactions	1114	Cetuximab	EGFR	gain:cnaBRCA47 (EGFR)	BRCA	6	45	0.000200726	0.0100363	-1.89959	1.99843	0.000287194	0.0143597	-1.83175	1.84285
Other pharmacogenomic interactions	249	Cabozantinib	VEGFR, MET, RET, KIT, FLT1, FLT3, FLT4, TIE2,AXL	BRAF_mut	THCA	7	16	0.00339825	0.0101948	-1.27138	1.99162	0.015057	0.045171	-1.39591	1.34514
Other pharmacogenomic interactions	1023	GW441756	NTRK1	STK11_mut	LUAD	11	53	0.00028297	0.0104699	-1.37432	1.98006	0.0892866	0.83615	-0.62075	0.0777156
Other pharmacogenomic interactions	1149	TW 37	BCL2, BCL-XL, MCL1	TP53_mut	PAAD	25	30	0.00116399	0.0104759	-1.87413	1.97981	0.00252715	0.0148293	-1.71296	1.82888
Other pharmacogenomic interactions	1158	XMD11-85h	BRSK2, FLT4, MARK4, PRKCD, RET, SPRK1	gain:cnaBRCA12 (TERT)	BRCA	5	26	0.000324745	0.0107166	-1.76548	1.96994	0.373667	0.880787	-0.226207	0.0551293
Other pharmacogenomic interactions	1268	XAV939	TNKS1, TNKS2	loss:cnaLUSC4	LUSC	7	15	0.000607144	0.0109286	-1.76532	1.96144	0.0413355	0.37202	-1.15017	0.429434
Other pharmacogenomic interactions	211	TL-2-105	not defined	loss:cnaGBM100	GBM	3	35	0.00298832	0.0109572	-1.84174	1.9603	0.00221735	0.00813028	-1.83084	2.08989
Other pharmacogenomic interactions	211	TL-2-105	not defined	loss:cnaGBM102	GBM	3	35	0.00298832	0.0109572	-1.84174	1.9603	0.00221735	0.00813028	-1.83084	2.08989
Other pharmacogenomic interactions	211	TL-2-105	not defined	loss:cnaGBM103	GBM	3	35	0.00298832	0.0109572	-1.84174	1.9603	0.00221735	0.00813028	-1.83084	2.08989
Other pharmacogenomic interactions	211	TL-2-105	not defined	loss:cnaGBM104	GBM	3	35	0.00298832	0.0109572	-1.84174	1.9603	0.00221735	0.00813028	-1.83084	2.08989
Other pharmacogenomic interactions	211	TL-2-105	not defined	loss:cnaGBM105	GBM	3	35	0.00298832	0.0109572	-1.84174	1.9603	0.00221735	0.00813028	-1.83084	2.08989
Other pharmacogenomic interactions	211	TL-2-105	not defined	loss:cnaGBM106	GBM	3	35	0.00298832	0.0109572	-1.84174	1.9603	0.00221735	0.00813028	-1.83084	2.08989
Other pharmacogenomic interactions	211	TL-2-105	not defined	loss:cnaGBM97	GBM	3	35	0.00298832	0.0109572	-1.84174	1.9603	0.00221735	0.00813028	-1.83084	2.08989
Other pharmacogenomic interactions	211	TL-2-105	not defined	loss:cnaGBM98	GBM	3	35	0.00298832	0.0109572	-1.84174	1.9603	0.00221735	0.00813028	-1.83084	2.08989
Other pharmacogenomic interactions	211	TL-2-105	not defined	loss:cnaGBM99 (ANK3)	GBM	3	35	0.00298832	0.0109572	-1.84174	1.9603	0.00221735	0.00813028	-1.83084	2.08989
Other pharmacogenomic interactions	30	Sorafenib	PDGFR, KIT, VEGFR, RAF	gain:cnaSTAD26 (MYC)	STAD	3	7	0.00291122	0.0116449	-1.11712	1.93387	0.226874	0.665021	-0.789534	0.177165
Other pharmacogenomic interactions	206	Ruxolitinib	JAK1, JAK2	SACS_mut	LAML	3	26	0.00195774	0.0117464	-0.809708	1.93009	0.000513921	0.00308353	-1.176	2.51095
Other pharmacogenomic interactions	111	Salubrinal	EIF2A	loss:cnaCOREAD19	COREAD	4	15	0.000453143	0.0117817	-2.86595	1.92879	0.00102075	0.0265396	-2.4118	1.57611
Other pharmacogenomic interactions	201	Epothilone B	Microtubule stabiliser	TP53_mut	BLCA	15	19	0.000997428	0.0119691	-2.31943	1.92194	0.00218264	0.0261916	-2.09772	1.58184
Other pharmacogenomic interactions	1016	Temsirolimus	MTOR	PIK3R1_mut	OV	4	31	0.000202386	0.0127503	-2.72479	1.89448	0.00106502	0.0670965	-2.44536	1.1733
Other pharmacogenomic interactions	308	WIKI4	TNKS1, TNKS2	loss:cnaUCEC8 (SRGAP3)	UCEC	3	9	0.000913712	0.012792	-2.72847	1.89306	0.00122309	0.0171233	-2.74315	1.76641
Other pharmacogenomic interactions	1218	JQ1	BRD2, BRD3, BRD4, BRDT	ATM_mut	COREAD	4	49	0.000143005	0.0128705	-1.43325	1.89041	0.201825	0.92816	0.577466	-0.032377
Other pharmacogenomic interactions	1526	Refametinib	MEK1, MEK2	loss:cnaLUSC54	LUSC	7	15	0.00578472	0.0130156	-1.18314	1.88554	0.0021124	0.00873021	-1.14152	2.05898
Other pharmacogenomic interactions	1527	Pictilisib	PI3K (class 1)	PIK3CA_mut	BRCA	16	45	0.000261082	0.0130541	-1.16114	1.88425	0.00199142	0.0995711	-1.05205	1.00187
Other pharmacogenomic interactions	1377	Afatinib	ERBB2, EGFR	NF2_mut	KIRC	6	30	0.000654321	0.0130864	-1.756	1.88318	0.00167283	0.0334567	-1.56391	1.47552
Other pharmacogenomic interactions	1061	SB590885	BRAF	PIK3CA_mut	UCEC	3	6	0.00445484	0.0133645	-0.944087	1.87405	0.00990991	0.0297297	-0.239372	1.52681
Other pharmacogenomic interactions	1036	PLX-4720	BRAF	RNF43_mut	PAAD	3	23	0.00470029	0.0141009	-1.74486	1.85075	0.474291	0.928413	-0.290664	0.0322587
Other pharmacogenomic interactions	249	Cabozantinib	VEGFR, MET, RET, KIT, FLT1, FLT3, FLT4, TIE2,AXL	gain:cnaSTAD45 (MET)	STAD	3	21	0.000654531	0.0143997	-2.64625	1.84165	0.000485744	0.0106864	-2.91721	1.97117
Other pharmacogenomic interactions	94	TGX221	PI3Kbeta	loss:cnaSTAD13	STAD	3	7	0.00740245	0.0148049	-3.31077	1.82959	0.158523	0.242837	-2.9168	0.614685
Other pharmacogenomic interactions	1006	Cytarabine	Antimetabolite	TP53_mut	PAAD	22	25	0.00298102	0.0149051	-2.09946	1.82667	0.0626738	0.16997	-1.23569	0.769628
Other pharmacogenomic interactions	1133	Serdemetan	MDM2	TP53_mut	GBM	20	34	0.000455174	0.0150208	-1.36703	1.82331	0.0772037	0.63693	-0.590111	0.195908
Other pharmacogenomic interactions	1067	CCT007093	PPM1D	gain:cnaCOREAD36	COREAD	4	45	0.000183667	0.0152444	-2.12012	1.81689	0.34787	0.97596	0.476991	-0.0105681
Other pharmacogenomic interactions	329	QL-XI-92	DDR1	SMARCA4_mut	OV	3	32	0.000242706	0.0152905	-2.44494	1.81558	0.0141019	0.414245	-1.53475	0.382743
Other pharmacogenomic interactions	254	Quizartinib	FLT3	loss:cnaGBM45	GBM	3	35	0.00468423	0.0154579	-1.89647	1.81085	0.0560767	0.123432	-1.26526	0.908572
Other pharmacogenomic interactions	147	NSC-87877	SHP-1 (PTPN6), SHP-2 (PTPN11)	gain:cnaLUAD12	LUAD	5	59	0.000368078	0.0154593	-1.79025	1.81081	0.00286043	0.120138	-1.48956	0.920319
Other pharmacogenomic interactions	135	Gemcitabine	Pyrimidine antimetabolite	TP53_mut	THCA	11	16	0.00515467	0.015464	-1.27036	1.81068	0.00655605	0.0196682	-1.0319	1.70624
Other pharmacogenomic interactions	64	CMK	RSK2	loss:cnaSTAD13	STAD	3	7	0.00787104	0.0157421	-1.12904	1.80294	0.0561036	0.112207	-0.905035	0.949979
Other pharmacogenomic interactions	283	Omipalisib	PI3K (class 1), MTORC1, MTORC2	gain:cnaESCA2 (KRAS)	ESCA	3	35	0.00198493	0.0158794	-1.0693	1.79917	0.00292389	0.0233911	-0.973223	1.63095
Other pharmacogenomic interactions	283	Omipalisib	PI3K (class 1), MTORC1, MTORC2	gain:cnaESCA3 (KRAS)	ESCA	3	35	0.00198493	0.0158794	-1.0693	1.79917	0.00292389	0.0233911	-0.973223	1.63095
Other pharmacogenomic interactions	164	JQ12	HDAC1, HDAC2	loss:cnaKIRC22	KIRC	6	24	0.00108372	0.0161268	-1.08154	1.79245	0.0396624	0.251195	-0.637213	0.599989
Other pharmacogenomic interactions	164	JQ12	HDAC1, HDAC2	loss:cnaKIRC3	KIRC	3	24	0.00254633	0.0161268	-0.774426	1.79245	0.271817	0.478347	0.035993	-0.320257
Other pharmacogenomic interactions	164	JQ12	HDAC1, HDAC2	loss:cnaKIRC4	KIRC	3	24	0.00254633	0.0161268	-0.774426	1.79245	0.271817	0.478347	0.035993	-0.320257
Other pharmacogenomic interactions	253	XMD14-99	ALK, CDK7, LTK, others	loss:cnaOV36	OV	3	32	0.000418711	0.0161884	-1.73473	1.7908	0.590279	0.969175	-0.0287075	0.0135979
Other pharmacogenomic interactions	253	XMD14-99	ALK, CDK7, LTK, others	loss:cnaOV87	OV	3	32	0.000770874	0.0161884	-2.10513	1.7908	0.999161	0.999161	0.113879	-0.000364385
Other pharmacogenomic interactions	253	XMD14-99	ALK, CDK7, LTK, others	loss:cnaOV88	OV	3	32	0.000770874	0.0161884	-2.10513	1.7908	0.999161	0.999161	0.113879	-0.000364385
Other pharmacogenomic interactions	59	WZ-1-84	BMX	TP53_mut	COREAD	11	15	0.000682777	0.0163866	-0.937962	1.78551	0.26893	0.461022	-0.332015	0.336278
Other pharmacogenomic interactions	1039	SL0101	RSK, AURKB, PIM1, PIM3	RNF43_mut	PAAD	3	23	0.0027333	0.0163998	-2.24301	1.78516	0.0817522	0.490513	-1.3025	0.309349
Other pharmacogenomic interactions	166	FTI-277	Farnesyl-transferase (FNTA)	RB1_mut	LUAD	3	59	0.000401402	0.0168589	-1.90867	1.77317	0.652754	0.879465	-0.286942	0.0557814
Other pharmacogenomic interactions	1375	Temozolomide	DNA alkylating agent	SMAD4_mut	HNSC	5	39	0.000653638	0.0169946	-1.82472	1.76969	0.00368064	0.0956967	-1.52576	1.0191
Other pharmacogenomic interactions	269	NSC-207895	MDM4	gain:cnaESCA2 (KRAS)	ESCA	3	35	0.00212575	0.017006	-1.36211	1.7694	0.0113926	0.0911411	-1.12133	1.04029
Other pharmacogenomic interactions	269	NSC-207895	MDM4	gain:cnaESCA3 (KRAS)	ESCA	3	35	0.00212575	0.017006	-1.36211	1.7694	0.0113926	0.0911411	-1.12133	1.04029
Other pharmacogenomic interactions	185	Linsitinib	IGF1R	ARID2_mut	SKCM	5	50	0.000747423	0.0171907	-1.92766	1.76471	0.00054675	0.0125752	-1.83927	1.90048
Other pharmacogenomic interactions	91	GSK319347A	IKK	gain:cnaSTAD26 (MYC)	STAD	3	7	0.0043399	0.0173596	-1.56946	1.76046	0.584189	0.74359	-0.544953	0.128667
Other pharmacogenomic interactions	59	WZ-1-84	BMX	gain:cnaBRCA26 (CDK12,ERBB2,MED24)	BRCA	3	12	0.00231984	0.0173988	-3.22848	1.75948	0.0120104	0.0900777	-2.41896	1.04538
Other pharmacogenomic interactions	59	WZ-1-84	BMX	gain:cnaBRCA27 (CLTC,PPM1D)	BRCA	3	12	0.00231984	0.0173988	-3.22848	1.75948	0.0120104	0.0900777	-2.41896	1.04538
Other pharmacogenomic interactions	310	YM201636	PYKFYVE	loss:cnaGBM100	GBM	3	35	0.00481136	0.0176417	-1.53515	1.75346	0.0485422	0.133491	-0.984822	0.874547
Other pharmacogenomic interactions	310	YM201636	PYKFYVE	loss:cnaGBM102	GBM	3	35	0.00481136	0.0176417	-1.53515	1.75346	0.0485422	0.133491	-0.984822	0.874547
Other pharmacogenomic interactions	310	YM201636	PYKFYVE	loss:cnaGBM103	GBM	3	35	0.00481136	0.0176417	-1.53515	1.75346	0.0485422	0.133491	-0.984822	0.874547
Other pharmacogenomic interactions	310	YM201636	PYKFYVE	loss:cnaGBM104	GBM	3	35	0.00481136	0.0176417	-1.53515	1.75346	0.0485422	0.133491	-0.984822	0.874547
Other pharmacogenomic interactions	310	YM201636	PYKFYVE	loss:cnaGBM105	GBM	3	35	0.00481136	0.0176417	-1.53515	1.75346	0.0485422	0.133491	-0.984822	0.874547
Other pharmacogenomic interactions	310	YM201636	PYKFYVE	loss:cnaGBM106	GBM	3	35	0.00481136	0.0176417	-1.53515	1.75346	0.0485422	0.133491	-0.984822	0.874547
Other pharmacogenomic interactions	310	YM201636	PYKFYVE	loss:cnaGBM97	GBM	3	35	0.00481136	0.0176417	-1.53515	1.75346	0.0485422	0.133491	-0.984822	0.874547
Other pharmacogenomic interactions	310	YM201636	PYKFYVE	loss:cnaGBM98	GBM	3	35	0.00481136	0.0176417	-1.53515	1.75346	0.0485422	0.133491	-0.984822	0.874547
Other pharmacogenomic interactions	310	YM201636	PYKFYVE	loss:cnaGBM99 (ANK3)	GBM	3	35	0.00481136	0.0176417	-1.53515	1.75346	0.0485422	0.133491	-0.984822	0.874547
Other pharmacogenomic interactions	255	CP724714	ERBB2	gain:cnaESCA7 (ERBB2)	ESCA	10	35	0.00110707	0.0177132	-1.06719	1.7517	0.000187607	0.00300171	-1.3651	2.52263
Other pharmacogenomic interactions	1011	Navitoclax	BCL2, BCL-XL, BCL-W	SMAD4_mut	PAAD	6	23	0.00296138	0.0177683	-1.22409	1.75035	0.0168027	0.100816	-1.07098	0.996469
Other pharmacogenomic interactions	260	NG-25	TAK1, MAP4K2	LARP4B_mut	UCEC	3	9	0.0012983	0.0181762	-0.653567	1.7405	0.026707	0.186949	-0.640497	0.728277
Other pharmacogenomic interactions	1262	UNC1215	L3MBTL3	gain:cnaESCA2 (KRAS)	ESCA	3	32	0.00229254	0.0183404	-2.11448	1.73659	0.68412	0.986239	-0.270199	0.00601763
Other pharmacogenomic interactions	1262	UNC1215	L3MBTL3	gain:cnaESCA3 (KRAS)	ESCA	3	32	0.00229254	0.0183404	-2.11448	1.73659	0.68412	0.986239	-0.270199	0.00601763
Other pharmacogenomic interactions	255	CP724714	ERBB2	loss:cnaLIHC10 (RB1)	LIHC	3	17	0.00620026	0.0186008	-2.07809	1.73047	0.0508058	0.152417	-1.37768	0.816966
Other pharmacogenomic interactions	302	PI-103	PI3Kalpha, DAPK3, CLK4, PIM3, HIPK2	gain:cnaESCA2 (KRAS)	ESCA	3	34	0.00250748	0.0188061	-1.1521	1.7257	0.00822652	0.0616989	-1.06671	1.20972
Other pharmacogenomic interactions	302	PI-103	PI3Kalpha, DAPK3, CLK4, PIM3, HIPK2	gain:cnaESCA3 (KRAS)	ESCA	3	34	0.00250748	0.0188061	-1.1521	1.7257	0.00822652	0.0616989	-1.06671	1.20972
Other pharmacogenomic interactions	344	THZ-2-49	CDK9	BRAF_mut	THCA	7	16	0.00634138	0.0190241	-1.31421	1.7207	0.00469758	0.0140927	-1.78562	1.851
Other pharmacogenomic interactions	147	NSC-87877	SHP-1 (PTPN6), SHP-2 (PTPN11)	PIK3CA_mut	OV	5	19	0.000547684	0.0191689	-1.06788	1.7174	0.00758222	0.265378	-1.05226	0.576136
Other pharmacogenomic interactions	253	XMD14-99	ALK, CDK7, LTK, others	loss:cnaOV42	OV	4	32	0.00123097	0.0193878	-1.54602	1.71247	0.603176	0.969175	-0.0589205	0.0135979
Other pharmacogenomic interactions	1054	Palbociclib	CDK4, CDK6	ARID2_mut	SKCM	3	40	0.00101204	0.0202407	-2.41798	1.69377	0.000910166	0.0182033	-2.19583	1.73985
Other pharmacogenomic interactions	1029	Motesanib	VEGFR, RET, KIT, PDGFR	loss:cnaKIRC27	KIRC	3	22	0.00120692	0.0205176	-3.20149	1.68787	0.947802	0.977578	-0.682148	0.00984841
Other pharmacogenomic interactions	1498	Selumetinib	MEK1, MEK2	loss:cnaLUSC4	LUSC	7	15	0.00115194	0.0207349	-1.42571	1.6833	0.00577951	0.0481701	-1.2809	1.31722
Other pharmacogenomic interactions	326	GSK690693	AKT1, AKT2, AKT3	NRAS_mut	THCA	3	16	0.00696438	0.0208931	-1.84853	1.68	0.257565	0.63348	-0.865835	0.198267
Other pharmacogenomic interactions	1372	Trametinib	MEK1, MEK2	loss:cnaLUSC4	LUSC	7	15	0.00268046	0.0212769	-1.7619	1.67209	0.000158878	0.0028598	-2.00869	2.54366
Other pharmacogenomic interactions	1372	Trametinib	MEK1, MEK2	loss:cnaLUSC3	LUSC	7	15	0.00207365	0.0212769	-1.80895	1.67209	0.0012288	0.00878632	-1.74116	2.05619
Other pharmacogenomic interactions	255	CP724714	ERBB2	gain:cnaBRCA27 (CLTC,PPM1D)	BRCA	9	48	0.000910048	0.0218412	-1.39615	1.66072	0.000406993	0.00976784	-1.46273	2.0102
Other pharmacogenomic interactions	326	GSK690693	AKT1, AKT2, AKT3	PIK3CA_mut	BRCA	16	48	0.000460324	0.0220955	-1.05606	1.6557	0.00400992	0.192476	-0.793224	0.715624
Other pharmacogenomic interactions	178	BAY-61-3606	SYK	NRAS_mut	THCA	3	16	0.00747774	0.0224332	-1.63561	1.64911	0.00510079	0.0153024	-1.70172	1.81524
Other pharmacogenomic interactions	211	TL-2-105	not defined	loss:cnaGBM133	GBM	3	35	0.00681799	0.0224994	-1.65432	1.64783	0.359266	0.439103	-0.553338	0.357434
Other pharmacogenomic interactions	1502	Bicalutamide	AR	loss:cnaCOREAD14	COREAD	3	46	0.000273797	0.0227252	-2.5648	1.64349	0.00985669	0.409053	-1.69218	0.388221
Other pharmacogenomic interactions	150	Bicalutamide	AR	NRAS_mut	THCA	3	16	0.00759544	0.0227863	-2.14557	1.64233	0.00754024	0.0226207	-1.60383	1.64549
Other pharmacogenomic interactions	1061	SB590885	BRAF	loss:cnaLUSC3	LUSC	6	13	0.0020715	0.0227865	-2.31758	1.64232	0.0659929	0.181481	-1.29386	0.74117
Other pharmacogenomic interactions	151	QS11	ARFGAP1	loss:cnaLIHC10 (RB1)	LIHC	3	17	0.00765823	0.0229747	-2.049	1.63875	0.00567735	0.017032	-2.14113	1.76873
Other pharmacogenomic interactions	1259	Talazoparib	PARP1, PARP2	gain:cnaLGG16 (EGFR)	LGG	5	17	0.0032901	0.0230307	-1.90756	1.63769	0.00129385	0.00905698	-2.12324	2.04302
Other pharmacogenomic interactions	1005	Cisplatin	DNA crosslinker	loss:cnaPAAD4 (CDKN2A)	PAAD	16	25	0.00460736	0.0230368	-1.29793	1.63758	0.0113308	0.0566541	-1.11161	1.24677
Other pharmacogenomic interactions	1010	Gefitinib	EGFR	gain:cnaCOREAD35 (FLT3,WASF3)	COREAD	6	42	0.000292018	0.0230694	-0.926595	1.63696	0.0223249	0.783605	-0.75553	0.105903
Other pharmacogenomic interactions	186	Bexarotene	Retinioic X receptor (RXR) agonist	loss:cnaPAAD4 (CDKN2A)	PAAD	16	29	0.0026559	0.0239031	-0.774609	1.62155	0.181824	0.327284	-0.386908	0.485076
Other pharmacogenomic interactions	1133	Serdemetan	MDM2	gain:cnaESCA11 (CCND1,CTTN)	ESCA	16	33	0.00189285	0.0241574	-1.1127	1.61695	0.000584411	0.00818175	-1.20466	2.08715
Other pharmacogenomic interactions	262	VX-11e	ERK2	NF1_mut	GBM	8	35	0.000732545	0.024174	-1.29109	1.61665	0.00224297	0.0740181	-1.09116	1.13066
Other pharmacogenomic interactions	292	Masitinib	KIT, PDGFRA, PDGFRB	loss:cnaKIRC12	KIRC	12	31	0.00695941	0.0243579	-0.875521	1.61336	0.00573162	0.030091	-0.76701	1.52156
Other pharmacogenomic interactions	292	Masitinib	KIT, PDGFRA, PDGFRB	loss:cnaKIRC13	KIRC	12	31	0.00695941	0.0243579	-0.875521	1.61336	0.00573162	0.030091	-0.76701	1.52156
Other pharmacogenomic interactions	292	Masitinib	KIT, PDGFRA, PDGFRB	loss:cnaKIRC14	KIRC	12	31	0.00695941	0.0243579	-0.875521	1.61336	0.00573162	0.030091	-0.76701	1.52156
Other pharmacogenomic interactions	292	Masitinib	KIT, PDGFRA, PDGFRB	loss:cnaKIRC15	KIRC	12	31	0.00695941	0.0243579	-0.875521	1.61336	0.00573162	0.030091	-0.76701	1.52156
Other pharmacogenomic interactions	292	Masitinib	KIT, PDGFRA, PDGFRB	loss:cnaKIRC22	KIRC	10	31	0.00597963	0.0243579	-1.07472	1.61336	0.0141716	0.0595209	-0.880832	1.22533
Other pharmacogenomic interactions	1194	SB-505124	ALK4, ALK5	CDKN2A_mut	HNSC	9	39	0.001344	0.0246836	-1.42887	1.60759	0.00783499	0.195875	-1.15101	0.708022
Other pharmacogenomic interactions	1194	SB-505124	ALK4, ALK5	HLA-A_mut	HNSC	3	39	0.00197469	0.0246836	-2.15206	1.60759	0.0622729	0.25947	-1.26676	0.585912
Other pharmacogenomic interactions	286	KIN001-236	Angiopoietin-1 receptor	gain:cnaLUSC14 (CCT5,TERT,TRIO)	LUSC	5	14	0.0015673	0.0250768	-2.40239	1.60073	0.000868951	0.0139032	-2.5755	1.85688
Other pharmacogenomic interactions	332	XMD15-27	CAMK2	SMAD4_mut	ESCA	4	35	0.00350263	0.025404	-1.10757	1.5951	0.027537	0.220296	-0.941241	0.656993
Other pharmacogenomic interactions	332	XMD15-27	CAMK2	loss:cnaESCA12	ESCA	8	35	0.00476324	0.025404	-1.49898	1.5951	0.0564093	0.287679	-1.16465	0.541092
Other pharmacogenomic interactions	1371	PLX-4720	BRAF	BRAF_mut	THCA	7	16	0.00851432	0.0255429	-1.62513	1.59273	0.00421375	0.0126413	-1.73644	1.89821
Other pharmacogenomic interactions	1	Erlotinib	EGFR	loss:cnaSKCM28	SKCM	3	16	0.00319705	0.0255764	-1.2917	1.59216	0.600079	0.933476	0.0537794	-0.0298968
Other pharmacogenomic interactions	1042	Doramapimod	p38, JNK2	NF2_mut	KIRC	3	23	0.00152459	0.025918	-1.62009	1.5864	0.875657	0.993387	-0.518625	0.00288142
Other pharmacogenomic interactions	1009	Tretinoin	Retinoic acid	ASXL1_mut	LAML	5	24	0.00434057	0.0260434	-1.57703	1.5843	0.00146897	0.00881381	-1.80021	2.05484
Other pharmacogenomic interactions	1218	JQ1	BRD2, BRD3, BRD4, BRDT	loss:cnaLUAD31	LUAD	4	61	0.000624082	0.0262115	-1.8599	1.58151	0.314143	0.843521	0.394105	-0.0739041
Other pharmacogenomic interactions	147	NSC-87877	SHP-1 (PTPN6), SHP-2 (PTPN11)	NRAS_mut	THCA	3	16	0.00877285	0.0263186	-2.13797	1.57974	0.123257	0.27869	-1.21686	0.554878
Other pharmacogenomic interactions	261	TL-1-85	TAK	loss:cnaUCEC8 (SRGAP3)	UCEC	3	9	0.0019159	0.0268226	-2.3423	1.5715	0.00621088	0.0869523	-2.19199	1.06072
Other pharmacogenomic interactions	1219	PFI-1	BRD4	loss:cnaLUSC3	LUSC	7	15	0.0059831	0.0269239	-1.72935	1.56986	0.0218849	0.0787856	-1.40835	1.10355
Other pharmacogenomic interactions	1218	JQ1	BRD2, BRD3, BRD4, BRDT	loss:cnaLGG7 (RPL22)	LGG	3	17	0.00771349	0.0269972	-1.98477	1.56868	0.0401634	0.140572	-1.31688	0.852101
Other pharmacogenomic interactions	151	QS11	ARFGAP1	TP53_mut	KIRC	8	23	0.00151814	0.0273264	-1.32506	1.56342	0.0819209	0.387115	-0.70526	0.41216
Other pharmacogenomic interactions	257	NPK76-II-72-1	PLK3	gain:cnaCOREAD47 (MYC)	COREAD	6	46	0.000314682	0.027692	-1.61419	1.55765	0.000977392	0.0430053	-1.32439	1.36648
Other pharmacogenomic interactions	279	BIX02189	MEK5, ERK5	loss:cnaOV34	OV	5	32	0.000441767	0.0278313	-2.10162	1.55547	0.00157772	0.095546	-1.89272	1.01979
Other pharmacogenomic interactions	308	WIKI4	TNKS1, TNKS2	loss:cnaGBM100	GBM	3	35	0.0076379	0.0280056	-1.77061	1.55275	0.0107127	0.0392798	-1.69545	1.40583
Other pharmacogenomic interactions	308	WIKI4	TNKS1, TNKS2	loss:cnaGBM102	GBM	3	35	0.0076379	0.0280056	-1.77061	1.55275	0.0107127	0.0392798	-1.69545	1.40583
Other pharmacogenomic interactions	308	WIKI4	TNKS1, TNKS2	loss:cnaGBM103	GBM	3	35	0.0076379	0.0280056	-1.77061	1.55275	0.0107127	0.0392798	-1.69545	1.40583
Other pharmacogenomic interactions	308	WIKI4	TNKS1, TNKS2	loss:cnaGBM104	GBM	3	35	0.0076379	0.0280056	-1.77061	1.55275	0.0107127	0.0392798	-1.69545	1.40583
Other pharmacogenomic interactions	308	WIKI4	TNKS1, TNKS2	loss:cnaGBM105	GBM	3	35	0.0076379	0.0280056	-1.77061	1.55275	0.0107127	0.0392798	-1.69545	1.40583
Other pharmacogenomic interactions	308	WIKI4	TNKS1, TNKS2	loss:cnaGBM106	GBM	3	35	0.0076379	0.0280056	-1.77061	1.55275	0.0107127	0.0392798	-1.69545	1.40583
Other pharmacogenomic interactions	308	WIKI4	TNKS1, TNKS2	loss:cnaGBM97	GBM	3	35	0.0076379	0.0280056	-1.77061	1.55275	0.0107127	0.0392798	-1.69545	1.40583
Other pharmacogenomic interactions	308	WIKI4	TNKS1, TNKS2	loss:cnaGBM98	GBM	3	35	0.0076379	0.0280056	-1.77061	1.55275	0.0107127	0.0392798	-1.69545	1.40583
Other pharmacogenomic interactions	308	WIKI4	TNKS1, TNKS2	loss:cnaGBM99 (ANK3)	GBM	3	35	0.0076379	0.0280056	-1.77061	1.55275	0.0107127	0.0392798	-1.69545	1.40583
Other pharmacogenomic interactions	175	PAC-1	Procaspase-3, Procaspase-7	loss:cnaLIHC10 (RB1)	LIHC	3	17	0.00934014	0.0280204	-1.97701	1.55253	0.00122167	0.00366502	-2.50192	2.43592
Other pharmacogenomic interactions	179	5-Fluorouracil	Antimetabolite (DNA & RNA)	loss:cnaSTAD13	STAD	11	20	0.00127387	0.0280251	-1.69451	1.55245	0.00363475	0.0799644	-1.54793	1.0971
Other pharmacogenomic interactions	279	BIX02189	MEK5, ERK5	loss:cnaSTAD13	STAD	11	21	0.00127485	0.0280467	-1.86432	1.55212	0.0179401	0.197341	-1.29415	0.704782
Other pharmacogenomic interactions	1007	Docetaxel	Microtubule stabiliser	TP53_mut	PAAD	22	25	0.00564125	0.0282063	-1.92856	1.54965	0.0171484	0.0857421	-1.62314	1.06681
Other pharmacogenomic interactions	1014	Refametinib	MEK1, MEK2	loss:cnaDLBC2	DLBC	3	32	0.00352945	0.0282356	-1.91247	1.5492	0.0172048	0.137638	-1.53506	0.861261
Other pharmacogenomic interactions	258	STF-62247	Autophagy inducer	loss:cnaBRCA23	BRCA	3	49	0.00167795	0.0285251	-1.42711	1.54477	0.0702929	0.582264	-0.590208	0.23488
Other pharmacogenomic interactions	150	Bicalutamide	AR	loss:cnaBRCA7 (FAS,PTEN)	BRCA	4	48	0.000559822	0.0285509	-1.96799	1.54438	0.653865	0.991527	0.0529108	-0.00369556
Other pharmacogenomic interactions	1019	Bosutinib	SRC, ABL, TEC	loss:cnaLIHC7 (CDKN2A)	LIHC	4	14	0.0142773	0.0285546	-1.74336	1.54432	0.0991009	0.198202	-0.989544	0.702892
Other pharmacogenomic interactions	166	FTI-277	Farnesyl-transferase (FNTA)	loss:cnaKIRC3	KIRC	3	24	0.00302243	0.0287131	-2.37994	1.54192	0.046251	0.219692	-1.49794	0.658185
Other pharmacogenomic interactions	166	FTI-277	Farnesyl-transferase (FNTA)	loss:cnaKIRC4	KIRC	3	24	0.00302243	0.0287131	-2.37994	1.54192	0.046251	0.219692	-1.49794	0.658185
Other pharmacogenomic interactions	269	NSC-207895	MDM4	ARID1B_mut	UCEC	4	8	0.00264489	0.0290938	-2.19322	1.5362	0.0058734	0.0646074	-1.48602	1.18972
Other pharmacogenomic interactions	287	KIN001-244	PDK1 (PDPK1)	LARP4B_mut	UCEC	3	9	0.00207885	0.0291039	-0.800521	1.53605	0.010462	0.146468	-0.219379	0.834256
Other pharmacogenomic interactions	263	FR-180204	ERK1, ERK2	loss:cnaKIRC23	KIRC	4	31	0.00138661	0.0291187	-1.74405	1.53583	0.0701773	0.729075	-0.838976	0.137228
Other pharmacogenomic interactions	293	Amuvatinib	KIT, PDGFRA, FLT3	NF1_mut	GBM	8	35	0.000888364	0.029316	-1.30289	1.5329	0.007354	0.242682	-1.15639	0.614962
Other pharmacogenomic interactions	1054	Palbociclib	CDK4, CDK6	RNF43_mut	PAAD	3	22	0.0049033	0.0294198	-2.14695	1.53136	0.103666	0.33482	-1.1462	0.475188
Other pharmacogenomic interactions	164	JQ12	HDAC1, HDAC2	loss:cnaKIRC12	KIRC	6	24	0.0108538	0.0294603	-0.489771	1.53076	0.143873	0.390511	-0.131388	0.408366
Other pharmacogenomic interactions	164	JQ12	HDAC1, HDAC2	loss:cnaKIRC13	KIRC	6	24	0.0108538	0.0294603	-0.489771	1.53076	0.143873	0.390511	-0.131388	0.408366
Other pharmacogenomic interactions	164	JQ12	HDAC1, HDAC2	loss:cnaKIRC14	KIRC	6	24	0.0108538	0.0294603	-0.489771	1.53076	0.143873	0.390511	-0.131388	0.408366
Other pharmacogenomic interactions	164	JQ12	HDAC1, HDAC2	loss:cnaKIRC15	KIRC	6	24	0.0108538	0.0294603	-0.489771	1.53076	0.143873	0.390511	-0.131388	0.408366
Other pharmacogenomic interactions	154	CHIR-99021	GSK3A, GSK3B	loss:cnaESCA12	ESCA	3	27	0.00212425	0.0297395	-2.14473	1.52667	0.706099	0.926991	-0.225921	0.0329243
Other pharmacogenomic interactions	1377	Afatinib	ERBB2, EGFR	gain:cnaLUSC41 (AKAP9)	LUSC	4	14	0.00169094	0.030437	-2.58807	1.5166	0.00501225	0.0902206	-2.15278	1.04469
Other pharmacogenomic interactions	230	GSK429286A	ROCK1, ROCK2	loss:cnaKIRC22	KIRC	10	31	0.00145466	0.0305479	-1.45435	1.51502	0.0348291	0.486146	-0.862956	0.313234
Other pharmacogenomic interactions	211	TL-2-105	not defined	loss:cnaGBM134	GBM	3	35	0.0111151	0.0305665	-1.54962	1.51475	0.0488027	0.123884	-1.13447	0.906986
Other pharmacogenomic interactions	211	TL-2-105	not defined	loss:cnaGBM135	GBM	3	35	0.0111151	0.0305665	-1.54962	1.51475	0.0488027	0.123884	-1.13447	0.906986
Other pharmacogenomic interactions	136	Mitomycin-C	DNA crosslinker	TP53_mut	THCA	11	16	0.0102027	0.030608	-0.932485	1.51417	0.0275679	0.0827037	-0.746667	1.08247
Other pharmacogenomic interactions	293	Amuvatinib	KIT, PDGFRA, FLT3	gain:cnaBRCA27 (CLTC,PPM1D)	BRCA	9	48	0.000637683	0.0306088	-1.271	1.51415	0.000159876	0.00767406	-1.31734	2.11497
Other pharmacogenomic interactions	300	CX-5461	RNA Polymerase 1	RNF43_mut	COREAD	10	46	0.000348002	0.0306242	-1.89528	1.51394	0.0723982	0.904198	-1.33826	0.0437363
Other pharmacogenomic interactions	171	AKT inhibitor VIII	AKT1, AKT2, AKT3	ARID1B_mut	UCEC	4	9	0.00220496	0.0308694	-1.43399	1.51047	0.0012604	0.0176456	-0.406582	1.75336
Other pharmacogenomic interactions	275	I-BET-762	BRD2, BRD3, BRD4	gain:cnaGBM71 (SOX2)	GBM	3	35	0.000936712	0.0309115	-2.23073	1.50988	0.0607154	0.664449	-1.22394	0.177538
Other pharmacogenomic interactions	1029	Motesanib	VEGFR, RET, KIT, PDGFR	loss:cnaGBM93	GBM	5	33	0.00891037	0.0310503	-1.1815	1.50793	0.0115286	0.119129	-1.19929	0.923981
Other pharmacogenomic interactions	1029	Motesanib	VEGFR, RET, KIT, PDGFR	loss:cnaGBM94	GBM	5	33	0.00891037	0.0310503	-1.1815	1.50793	0.0115286	0.119129	-1.19929	0.923981
Other pharmacogenomic interactions	1029	Motesanib	VEGFR, RET, KIT, PDGFR	loss:cnaGBM95	GBM	5	33	0.00891037	0.0310503	-1.1815	1.50793	0.0115286	0.119129	-1.19929	0.923981
Other pharmacogenomic interactions	1029	Motesanib	VEGFR, RET, KIT, PDGFR	loss:cnaGBM100	GBM	3	33	0.0130211	0.0310503	-1.60778	1.50793	0.11355	0.270774	-1.01242	0.567394
Other pharmacogenomic interactions	1029	Motesanib	VEGFR, RET, KIT, PDGFR	loss:cnaGBM102	GBM	3	33	0.0130211	0.0310503	-1.60778	1.50793	0.11355	0.270774	-1.01242	0.567394
Other pharmacogenomic interactions	1029	Motesanib	VEGFR, RET, KIT, PDGFR	loss:cnaGBM103	GBM	3	33	0.0130211	0.0310503	-1.60778	1.50793	0.11355	0.270774	-1.01242	0.567394
Other pharmacogenomic interactions	1029	Motesanib	VEGFR, RET, KIT, PDGFR	loss:cnaGBM104	GBM	3	33	0.0130211	0.0310503	-1.60778	1.50793	0.11355	0.270774	-1.01242	0.567394
Other pharmacogenomic interactions	1029	Motesanib	VEGFR, RET, KIT, PDGFR	loss:cnaGBM105	GBM	3	33	0.0130211	0.0310503	-1.60778	1.50793	0.11355	0.270774	-1.01242	0.567394
Other pharmacogenomic interactions	1029	Motesanib	VEGFR, RET, KIT, PDGFR	loss:cnaGBM106	GBM	3	33	0.0130211	0.0310503	-1.60778	1.50793	0.11355	0.270774	-1.01242	0.567394
Other pharmacogenomic interactions	1029	Motesanib	VEGFR, RET, KIT, PDGFR	loss:cnaGBM97	GBM	3	33	0.0130211	0.0310503	-1.60778	1.50793	0.11355	0.270774	-1.01242	0.567394
Other pharmacogenomic interactions	1029	Motesanib	VEGFR, RET, KIT, PDGFR	loss:cnaGBM98	GBM	3	33	0.0130211	0.0310503	-1.60778	1.50793	0.11355	0.270774	-1.01242	0.567394
Other pharmacogenomic interactions	1029	Motesanib	VEGFR, RET, KIT, PDGFR	loss:cnaGBM99 (ANK3)	GBM	3	33	0.0130211	0.0310503	-1.60778	1.50793	0.11355	0.270774	-1.01242	0.567394
Other pharmacogenomic interactions	1029	Motesanib	VEGFR, RET, KIT, PDGFR	loss:cnaGBM47	GBM	5	33	0.011933	0.0310503	-1.74501	1.50793	0.230413	0.466702	-0.803444	0.33096
Other pharmacogenomic interactions	1047	Nutlin-3a (-)	MDM2	loss:cnaDLBC4 (CDKN2A)	DLBC	8	32	0.0079415	0.031766	-1.49195	1.49804	0.0189862	0.0759447	-1.32992	1.1195
Other pharmacogenomic interactions	326	GSK690693	AKT1, AKT2, AKT3	ASXL2_mut	COREAD	4	46	0.00257253	0.0323403	-2.15766	1.49026	0.0147525	0.162277	-1.77114	0.789743
Other pharmacogenomic interactions	178	BAY-61-3606	SYK	EP300_mut	PAAD	3	30	0.00361772	0.0325595	-1.91164	1.48732	0.00198528	0.0178675	-1.98896	1.74794
Other pharmacogenomic interactions	1005	Cisplatin	DNA crosslinker	gain:cnaLGG16 (EGFR)	LGG	5	15	0.00549945	0.0329967	-1.91525	1.48153	0.00589531	0.0353719	-1.92458	1.45134
Other pharmacogenomic interactions	341	Selisistat	SIRT1	TP53_mut	PAAD	24	29	0.00372806	0.0335526	-1.56116	1.47427	0.052828	0.163215	-0.926892	0.787241
Other pharmacogenomic interactions	287	KIN001-244	PDK1 (PDPK1)	BRAF_mut	THCA	7	16	0.0111877	0.033563	-1.51134	1.47414	0.0062422	0.0187266	-1.87596	1.72754
Other pharmacogenomic interactions	1011	Navitoclax	BCL2, BCL-XL, BCL-W	gain:cnaCOREAD32 (STK4)	COREAD	7	41	0.00131582	0.0337728	-1.88874	1.47143	0.00168451	0.0432359	-1.6926	1.36416
Other pharmacogenomic interactions	1021	Axitinib	PDGFR, KIT, VEGFR	PIK3R1_mut	OV	4	30	0.000557482	0.0340064	-2.63139	1.46844	0.00204278	0.12461	-2.19291	0.904448
Other pharmacogenomic interactions	333	T0901317	LXR, FXR	gain:cnaBLCA23 (MYC)	BLCA	4	19	0.00283787	0.0340544	-1.80492	1.46783	0.059331	0.461597	-1.02458	0.335737
Other pharmacogenomic interactions	302	PI-103	PI3Kalpha, DAPK3, CLK4, PIM3, HIPK2	loss:cnaSTAD13	STAD	11	21	0.00155032	0.0341071	-1.51619	1.46716	0.00164054	0.0360918	-1.63092	1.44259
Other pharmacogenomic interactions	1142	HG-5-113-01	LOK, LTK, TRCB, ABL(T315I)	TP53_mut	BLCA	4	7	0.0170906	0.0341812	-0.887526	1.46621	0.0625158	0.125032	-0.275174	0.90298
Other pharmacogenomic interactions	166	FTI-277	Farnesyl-transferase (FNTA)	APC_mut	STAD	3	21	0.00311127	0.0342239	-1.85118	1.46567	0.0247844	0.134395	-1.69673	0.871617
Other pharmacogenomic interactions	166	FTI-277	Farnesyl-transferase (FNTA)	ARID2_mut	STAD	3	21	0.00187244	0.0342239	-1.69128	1.46567	0.0585387	0.214642	-1.3277	0.668286
Other pharmacogenomic interactions	1061	SB590885	BRAF	loss:cnaLUSC4	LUSC	6	13	0.00622557	0.0342407	-1.99732	1.46546	0.383349	0.454871	-0.67014	0.342112
Other pharmacogenomic interactions	29	AZ628	BRAF	NF1_mut	LGG	3	11	0.00577362	0.0346417	-2.31205	1.4604	0.193837	0.581511	-1.17383	0.235442
Other pharmacogenomic interactions	185	Linsitinib	IGF1R	gain:cnaOV19	OV	3	18	0.00138973	0.0347433	-2.72795	1.45913	0.0867501	0.954629	-1.26442	0.0201652
Other pharmacogenomic interactions	310	YM201636	PYKFYVE	loss:cnaGBM2 (CDKN2A)	GBM	26	35	0.0105901	0.0349474	-1.09485	1.45658	0.00467456	0.110092	-1.20082	0.958244
Other pharmacogenomic interactions	326	GSK690693	AKT1, AKT2, AKT3	ARID2_mut	COREAD	7	46	0.00320666	0.0352733	-1.6439	1.45255	0.00678551	0.0995208	-1.7614	1.00209
Other pharmacogenomic interactions	71	Pyrimethamine	Dihydrofolate reductase (DHFR)	loss:cnaSTAD13	STAD	3	7	0.0176679	0.0353359	-3.33403	1.45178	0.055345	0.11069	-2.40491	0.955892
Other pharmacogenomic interactions	332	XMD15-27	CAMK2	loss:cnaESCA5 (PAX5)	ESCA	3	35	0.00888345	0.0355338	-1.60864	1.44936	0.0719197	0.287679	-1.31591	0.541092
Other pharmacogenomic interactions	1218	JQ1	BRD2, BRD3, BRD4, BRDT	NOTCH1_mut	ESCA	4	33	0.00446179	0.0356943	-1.52395	1.4474	0.713366	0.972241	-0.182727	0.0122259
Other pharmacogenomic interactions	147	NSC-87877	SHP-1 (PTPN6), SHP-2 (PTPN11)	SOS2_mut	COREAD	4	39	0.000476929	0.0357697	-2.3582	1.44648	0.19654	0.932068	-1.15302	0.0305525
Other pharmacogenomic interactions	282	Pelitinib	EGFR	loss:cnaKIRC12	KIRC	12	31	0.0069117	0.0362864	-0.69547	1.44026	0.00730557	0.0383542	-0.539354	1.41619
Other pharmacogenomic interactions	282	Pelitinib	EGFR	loss:cnaKIRC13	KIRC	12	31	0.0069117	0.0362864	-0.69547	1.44026	0.00730557	0.0383542	-0.539354	1.41619
Other pharmacogenomic interactions	282	Pelitinib	EGFR	loss:cnaKIRC14	KIRC	12	31	0.0069117	0.0362864	-0.69547	1.44026	0.00730557	0.0383542	-0.539354	1.41619
Other pharmacogenomic interactions	282	Pelitinib	EGFR	loss:cnaKIRC15	KIRC	12	31	0.0069117	0.0362864	-0.69547	1.44026	0.00730557	0.0383542	-0.539354	1.41619
Other pharmacogenomic interactions	290	KIN001-260	IKKB	loss:cnaOV34	OV	5	31	0.000910326	0.0369933	-1.9105	1.43188	0.00196593	0.121888	-1.71044	0.914039
Other pharmacogenomic interactions	290	KIN001-260	IKKB	loss:cnaOV35	OV	5	31	0.00119333	0.0369933	-1.8604	1.43188	0.00512674	0.158929	-1.53221	0.798797
Other pharmacogenomic interactions	294	MPS-1-IN-1	MPS1	loss:cnaSTAD47	STAD	7	21	0.00169125	0.0372076	-1.26252	1.42937	0.0113319	0.139808	-1.11109	0.85447
Other pharmacogenomic interactions	229	Enzastaurin	PKCB	loss:cnaKIRC12	KIRC	12	31	0.00708778	0.0372109	-0.509969	1.42933	0.0171581	0.0900799	-0.281239	1.04537
Other pharmacogenomic interactions	229	Enzastaurin	PKCB	loss:cnaKIRC13	KIRC	12	31	0.00708778	0.0372109	-0.509969	1.42933	0.0171581	0.0900799	-0.281239	1.04537
Other pharmacogenomic interactions	229	Enzastaurin	PKCB	loss:cnaKIRC14	KIRC	12	31	0.00708778	0.0372109	-0.509969	1.42933	0.0171581	0.0900799	-0.281239	1.04537
Other pharmacogenomic interactions	229	Enzastaurin	PKCB	loss:cnaKIRC15	KIRC	12	31	0.00708778	0.0372109	-0.509969	1.42933	0.0171581	0.0900799	-0.281239	1.04537
Other pharmacogenomic interactions	1175	Rucaparib	PARP1, PARP2	loss:cnaPRAD7	PRAD	3	6	0.0373407	0.0373407	-1.20357	1.42782	0.187184	0.187184	-1.69391	0.727731
Other pharmacogenomic interactions	119	Lapatinib	ERBB2, EGFR	gain:cnaSKCM12 (KRAS)	SKCM	3	16	0.00469598	0.0375678	-0.515965	1.42518	0.0181386	0.145109	-1.18352	0.838307
Other pharmacogenomic interactions	304	SB52334	ALK5	loss:cnaSTAD47	STAD	7	21	0.00172466	0.0379426	-2.04368	1.42087	0.00793269	0.174519	-1.66735	0.758157
Other pharmacogenomic interactions	1243	Piperlongumine	Induces reactive oxygen species	gain:cnaLGG16 (EGFR)	LGG	5	17	0.00544597	0.0381218	-1.80014	1.41883	0.000260225	0.00182157	-2.67165	2.73955
Other pharmacogenomic interactions	192	LFM-A13	BTK	PTEN_mut	UCEC	6	9	0.00547557	0.038329	-0.487746	1.41647	0.236732	0.66285	-1.05567	0.178585
Other pharmacogenomic interactions	1149	TW 37	BCL2, BCL-XL, MCL1	gain:cnaPAAD2 (KRAS)	PAAD	10	30	0.0127916	0.0383749	-1.1247	1.41595	0.00329541	0.0148293	-1.3241	1.82888
Other pharmacogenomic interactions	211	TL-2-105	not defined	loss:cnaGBM45	GBM	3	35	0.0156412	0.0397045	-1.46886	1.40116	0.0671541	0.158292	-1.04883	0.800542
Other pharmacogenomic interactions	276	CAY10603	HDAC1, HDAC6	NF1_mut	GBM	8	35	0.00121321	0.040036	-1.2893	1.39755	0.00313248	0.103372	-1.23027	0.985598
Other pharmacogenomic interactions	1242	(5Z)-7-Oxozeaenol	TAK1	loss:cnaGBM100	GBM	3	35	0.0156893	0.0400472	-1.5796	1.39743	0.0124228	0.0341626	-1.65251	1.46645
Other pharmacogenomic interactions	1242	(5Z)-7-Oxozeaenol	TAK1	loss:cnaGBM102	GBM	3	35	0.0156893	0.0400472	-1.5796	1.39743	0.0124228	0.0341626	-1.65251	1.46645
Other pharmacogenomic interactions	1242	(5Z)-7-Oxozeaenol	TAK1	loss:cnaGBM103	GBM	3	35	0.0156893	0.0400472	-1.5796	1.39743	0.0124228	0.0341626	-1.65251	1.46645
Other pharmacogenomic interactions	1242	(5Z)-7-Oxozeaenol	TAK1	loss:cnaGBM104	GBM	3	35	0.0156893	0.0400472	-1.5796	1.39743	0.0124228	0.0341626	-1.65251	1.46645
Other pharmacogenomic interactions	1242	(5Z)-7-Oxozeaenol	TAK1	loss:cnaGBM105	GBM	3	35	0.0156893	0.0400472	-1.5796	1.39743	0.0124228	0.0341626	-1.65251	1.46645
Other pharmacogenomic interactions	1242	(5Z)-7-Oxozeaenol	TAK1	loss:cnaGBM106	GBM	3	35	0.0156893	0.0400472	-1.5796	1.39743	0.0124228	0.0341626	-1.65251	1.46645
Other pharmacogenomic interactions	1242	(5Z)-7-Oxozeaenol	TAK1	loss:cnaGBM47	GBM	6	35	0.00273569	0.0400472	-1.36728	1.39743	0.00189448	0.0341626	-1.46192	1.46645
Other pharmacogenomic interactions	1242	(5Z)-7-Oxozeaenol	TAK1	loss:cnaGBM97	GBM	3	35	0.0156893	0.0400472	-1.5796	1.39743	0.0124228	0.0341626	-1.65251	1.46645
Other pharmacogenomic interactions	1242	(5Z)-7-Oxozeaenol	TAK1	loss:cnaGBM98	GBM	3	35	0.0156893	0.0400472	-1.5796	1.39743	0.0124228	0.0341626	-1.65251	1.46645
Other pharmacogenomic interactions	1242	(5Z)-7-Oxozeaenol	TAK1	loss:cnaGBM99 (ANK3)	GBM	3	35	0.0156893	0.0400472	-1.5796	1.39743	0.0124228	0.0341626	-1.65251	1.46645
Other pharmacogenomic interactions	1010	Gefitinib	EGFR	gain:cnaESCA11 (CCND1,CTTN)	ESCA	13	31	0.00267612	0.0401417	-0.438033	1.3964	0.00640244	0.0960366	-0.527374	1.01756
Other pharmacogenomic interactions	226	GSK1070916	AURKA, AURKC	loss:cnaUCEC8 (SRGAP3)	UCEC	3	9	0.0028677	0.0401478	-2.39273	1.39634	0.00655925	0.0918295	-1.01378	1.03702
Other pharmacogenomic interactions	260	NG-25	TAK1, MAP4K2	loss:cnaKIRC12	KIRC	12	31	0.0077343	0.0406051	-0.674169	1.39142	0.0468842	0.199097	-0.390377	0.700936
Other pharmacogenomic interactions	260	NG-25	TAK1, MAP4K2	loss:cnaKIRC13	KIRC	12	31	0.0077343	0.0406051	-0.674169	1.39142	0.0468842	0.199097	-0.390377	0.700936
Other pharmacogenomic interactions	260	NG-25	TAK1, MAP4K2	loss:cnaKIRC14	KIRC	12	31	0.0077343	0.0406051	-0.674169	1.39142	0.0468842	0.199097	-0.390377	0.700936
Other pharmacogenomic interactions	260	NG-25	TAK1, MAP4K2	loss:cnaKIRC15	KIRC	12	31	0.0077343	0.0406051	-0.674169	1.39142	0.0468842	0.199097	-0.390377	0.700936
Other pharmacogenomic interactions	60	BI-2536	PLK1, PLK2, PLK3	TP53_mut	LGG	8	11	0.00677516	0.0406509	-2.53211	1.39093	0.0251307	0.0753921	-1.95143	1.12267
Other pharmacogenomic interactions	206	Ruxolitinib	JAK1, JAK2	loss:cnaDLBC4 (CDKN2A)	DLBC	7	29	0.0101951	0.0407804	-0.813658	1.38955	0.0467653	0.187061	-0.550806	0.728016
Other pharmacogenomic interactions	62	BMS-536924	IGF1R, IR	BRAF_mut	SKCM	12	18	0.00909548	0.0409297	-0.76552	1.38796	0.0214028	0.0963124	-0.405693	1.01632
Other pharmacogenomic interactions	1194	SB-505124	ALK4, ALK5	loss:cnaGBM134	GBM	3	35	0.00248129	0.0409413	-1.84369	1.38784	0.0968527	0.505459	-0.973374	0.296314
Other pharmacogenomic interactions	1194	SB-505124	ALK4, ALK5	loss:cnaGBM135	GBM	3	35	0.00248129	0.0409413	-1.84369	1.38784	0.0968527	0.505459	-0.973374	0.296314
Other pharmacogenomic interactions	1060	PD0325901	MEK1, MEK2	PIK3R1_mut	UCEC	3	8	0.00416271	0.0416271	-1.05242	1.38062	0.277968	0.536539	-0.673301	0.270399
Other pharmacogenomic interactions	1066	AZD6482	PI3Kbeta	BRAF_mut	THCA	7	16	0.0139414	0.0418243	-1.0457	1.37857	0.0148504	0.0445511	-1.31562	1.35114
Other pharmacogenomic interactions	286	KIN001-236	Angiopoietin-1 receptor	SMAD4_mut	HNSC	6	40	0.00167918	0.0419794	-1.49043	1.37696	0.00473452	0.118363	-1.32164	0.926784
Other pharmacogenomic interactions	147	NSC-87877	SHP-1 (PTPN6), SHP-2 (PTPN11)	ASH1L_mut	BRCA	3	47	0.000876556	0.0420747	-1.96907	1.37598	0.000818193	0.0392732	-2.53339	1.4059
Other pharmacogenomic interactions	222	BX-912	PDK1 (PDPK1)	loss:cnaBLCA18 (CHD9,CNOT1,CYLD,MMP2,NUP93)	BLCA	3	19	0.00555435	0.0421311	-2.00505	1.3754	0.0167586	0.100552	-1.71845	0.997611
Other pharmacogenomic interactions	310	YM201636	PYKFYVE	loss:cnaESCA12	ESCA	8	35	0.00263801	0.0422082	-1.7578	1.3746	0.0235852	0.377363	-1.43419	0.423241
Other pharmacogenomic interactions	1114	Cetuximab	EGFR	KRAS_mut	LAML	3	26	0.0070365	0.042219	-1.80451	1.37449	0.311902	0.551269	0.989806	-0.258637
Other pharmacogenomic interactions	230	GSK429286A	ROCK1, ROCK2	loss:cnaKIRC12	KIRC	12	31	0.0100567	0.042238	-1.08522	1.3743	0.138899	0.486146	-0.499687	0.313234
Other pharmacogenomic interactions	230	GSK429286A	ROCK1, ROCK2	loss:cnaKIRC13	KIRC	12	31	0.0100567	0.042238	-1.08522	1.3743	0.138899	0.486146	-0.499687	0.313234
Other pharmacogenomic interactions	230	GSK429286A	ROCK1, ROCK2	loss:cnaKIRC14	KIRC	12	31	0.0100567	0.042238	-1.08522	1.3743	0.138899	0.486146	-0.499687	0.313234
Other pharmacogenomic interactions	230	GSK429286A	ROCK1, ROCK2	loss:cnaKIRC15	KIRC	12	31	0.0100567	0.042238	-1.08522	1.3743	0.138899	0.486146	-0.499687	0.313234
Other pharmacogenomic interactions	154	CHIR-99021	GSK3A, GSK3B	loss:cnaKIRC12	KIRC	6	24	0.0111229	0.0422669	-1.44753	1.374	0.000848084	0.00322272	-1.25221	2.49178
Other pharmacogenomic interactions	154	CHIR-99021	GSK3A, GSK3B	loss:cnaKIRC13	KIRC	6	24	0.0111229	0.0422669	-1.44753	1.374	0.000848084	0.00322272	-1.25221	2.49178
Other pharmacogenomic interactions	154	CHIR-99021	GSK3A, GSK3B	loss:cnaKIRC14	KIRC	6	24	0.0111229	0.0422669	-1.44753	1.374	0.000848084	0.00322272	-1.25221	2.49178
Other pharmacogenomic interactions	154	CHIR-99021	GSK3A, GSK3B	loss:cnaKIRC15	KIRC	6	24	0.0111229	0.0422669	-1.44753	1.374	0.000848084	0.00322272	-1.25221	2.49178
Other pharmacogenomic interactions	154	CHIR-99021	GSK3A, GSK3B	loss:cnaKIRC22	KIRC	6	24	0.00539292	0.0422669	-1.54611	1.374	0.00412788	0.0130716	-1.29914	1.88367
Other pharmacogenomic interactions	140	Vinorelbine	Microtubule destabiliser	TP53_mut	BLCA	15	19	0.00352689	0.0423227	-1.91033	1.37343	0.0202127	0.242552	-1.41274	0.615195
Other pharmacogenomic interactions	186	Bexarotene	Retinioic X receptor (RXR) agonist	NRAS_mut	BLCA	3	19	0.00353731	0.0424477	-2.15777	1.37215	0.00417173	0.0500607	-2.14421	1.3005
Other pharmacogenomic interactions	166	FTI-277	Farnesyl-transferase (FNTA)	ARID2_mut	SKCM	5	51	0.00186119	0.0428073	-1.34814	1.36848	0.0176423	0.170875	-1.14653	0.767322
Other pharmacogenomic interactions	1061	SB590885	BRAF	gain:cnaSKCM21 (FOXP1,MITF)	SKCM	4	39	0.00683175	0.0432678	-1.64732	1.36384	0.00376252	0.0238293	-1.76448	1.62289
Other pharmacogenomic interactions	211	TL-2-105	not defined	loss:cnaSTAD12	STAD	4	21	0.00197597	0.0434714	-2.21089	1.3618	0.0199842	0.291065	-1.53608	0.53601
Other pharmacogenomic interactions	166	FTI-277	Farnesyl-transferase (FNTA)	SETD2_mut	KIRC	4	24	0.00687486	0.0435408	-1.53097	1.3611	0.00330846	0.0628607	-1.76709	1.20162
Other pharmacogenomic interactions	223	ZSTK474	PI3K (class 1)	BRAF_mut	THCA	7	16	0.0145285	0.0435855	-1.03596	1.36066	0.0223757	0.067127	-1.14096	1.1731
Other pharmacogenomic interactions	1498	Selumetinib	MEK1, MEK2	loss:cnaLUSC54	LUSC	7	15	0.0108819	0.0445279	-0.621128	1.35137	0.00808399	0.0481701	-0.662778	1.31722
Other pharmacogenomic interactions	153	Midostaurin	PKC, PPK, FLT1, c-FGR, others	gain:cnaPAAD3	PAAD	4	30	0.00498102	0.0448292	-1.59607	1.34844	0.00469612	0.0422651	-1.63025	1.37402
Other pharmacogenomic interactions	1498	Selumetinib	MEK1, MEK2	TP53_mut	PAAD	23	28	0.00505325	0.0454793	-1.45681	1.34219	0.00616162	0.0554546	-1.42266	1.25606
Other pharmacogenomic interactions	201	Epothilone B	Microtubule stabiliser	TP53_mut	THCA	11	16	0.0152004	0.0456011	-1.16649	1.34103	0.0234651	0.0703952	-1.02251	1.15246
Other pharmacogenomic interactions	1372	Trametinib	MEK1, MEK2	loss:cnaPRAD7	PRAD	3	6	0.0457516	0.0457516	-1.45414	1.33959	0.0317572	0.0317572	-2.21169	1.49816
Other pharmacogenomic interactions	1018	Veliparib	PARP1, PARP2	gain:cnaLUAD13 (MET)	LUAD	5	53	0.00247974	0.0458752	-1.50344	1.33842	0.48056	0.8348	-0.317507	0.0784177
Other pharmacogenomic interactions	306	Fedratinib	JAK2	loss:cnaBRCA18	BRCA	15	48	0.000968802	0.0465025	-1.20258	1.33252	0.00280659	0.134716	-1.1166	0.870579
Other pharmacogenomic interactions	279	BIX02189	MEK5, ERK5	loss:cnaOV33 (ZFHX3)	OV	4	32	0.00147863	0.0465768	-2.02391	1.33183	0.00454981	0.095546	-1.75855	1.01979
Other pharmacogenomic interactions	344	THZ-2-49	CDK9	MKL1_mut	UCEC	3	9	0.00668308	0.0467816	-0.721124	1.32993	0.079981	0.279934	-0.59659	0.552945
Other pharmacogenomic interactions	127	GSK269962A	ROCK1, ROCK2	gain:cnaESCA11 (CCND1,CTTN)	ESCA	5	9	0.0234971	0.0469941	-3.00506	1.32796	0.0454437	0.0908873	-1.25666	1.0415
Other pharmacogenomic interactions	164	JQ12	HDAC1, HDAC2	loss:cnaKIRC24 (FAT1,IRF2)	KIRC	5	24	0.0223723	0.0472303	-0.914426	1.32578	0.841538	0.878346	0.128238	-0.0563343
Other pharmacogenomic interactions	211	TL-2-105	not defined	loss:cnaGBM1	GBM	3	35	0.0201222	0.0474308	-1.40771	1.32394	0.160842	0.26539	-0.790043	0.576115
Other pharmacogenomic interactions	166	FTI-277	Farnesyl-transferase (FNTA)	EP300_mut	STAD	3	21	0.00647071	0.0474519	-2.05025	1.32375	0.012583	0.134395	-1.97749	0.871617
Other pharmacogenomic interactions	1013	Nilotinib	ABL	NF2_mut	KIRC	3	20	0.00279278	0.0474772	-2.25065	1.32351	0.0293985	0.486888	-1.51765	0.312571
Other pharmacogenomic interactions	293	Amuvatinib	KIT, PDGFRA, FLT3	loss:cnaLUAD15	LUAD	7	61	0.00113429	0.0476401	-1.40629	1.32203	0.0113939	0.478542	-1.09923	0.32008
Other pharmacogenomic interactions	1001	AICA Ribonucleotide	AMPK agonist	EP300_mut	UCEC	4	8	0.00867121	0.0476917	-0.076824	1.32156	0.324537	0.874284	-0.66948	0.0583476
Other pharmacogenomic interactions	255	CP724714	ERBB2	loss:cnaKIRC23	KIRC	4	31	0.00227766	0.0478308	-1.59815	1.32029	0.145715	0.735908	-0.482436	0.133176
Other pharmacogenomic interactions	238	Idelalisib	PI3Kdelta	BRAF_mut	THCA	7	16	0.0161254	0.0483762	-0.91452	1.31537	0.00412112	0.0123633	-1.8439	1.90786
Other pharmacogenomic interactions	164	JQ12	HDAC1, HDAC2	BRAF_mut	COREAD	9	39	0.0006459	0.0484425	-1.39621	1.31477	0.0477266	0.595244	-0.849682	0.225305
Other pharmacogenomic interactions	166	FTI-277	Farnesyl-transferase (FNTA)	FAM123B_mut	COREAD	3	39	0.00064626	0.0484695	-1.95446	1.31453	0.0189829	0.239173	-1.21455	0.621287
Other pharmacogenomic interactions	1050	ZM447439	AURKA, AURKB	CTNNB1_mut	COREAD	6	39	0.00131245	0.0485605	-1.81721	1.31372	0.00675158	0.200858	-1.54899	0.69711
Other pharmacogenomic interactions	224	AS605240	PI3Kgamma	BCOR_mut	STAD	3	21	0.00788734	0.0486234	-1.65525	1.31315	0.00493082	0.0361594	-1.55808	1.44178
Other pharmacogenomic interactions	224	AS605240	PI3Kgamma	CDH1_mut	STAD	4	21	0.00478319	0.0486234	-1.71292	1.31315	0.00180315	0.0361594	-1.93862	1.44178
Other pharmacogenomic interactions	1010	Gefitinib	EGFR	CREBBP_mut	DLBC	7	30	0.00609332	0.0487466	-1.18385	1.31206	0.15763	0.735896	-0.64408	0.133183
Other pharmacogenomic interactions	1373	Dabrafenib	BRAF	NRAS_mut	BLCA	3	17	0.00443565	0.0487922	-2.2512	1.31165	0.032935	0.265946	-1.58916	0.575206
Other pharmacogenomic interactions	330	XMD13-2	RIPK1	loss:cnaHNSC32 (FAT1)	HNSC	13	40	0.00195627	0.0489068	-1.09687	1.31063	0.00110814	0.0277036	-1.17917	1.55746
Other pharmacogenomic interactions	1017	Olaparib	PARP1, PARP2	KRAS_mut	LUAD	17	53	0.00132265	0.048938	-0.99129	1.31035	0.0459011	0.840661	-0.555422	0.0753789
Other pharmacogenomic interactions	310	YM201636	PYKFYVE	loss:cnaGBM45	GBM	3	35	0.0165658	0.0496973	-1.27651	1.30367	0.164288	0.320343	-0.652193	0.494385
Other pharmacogenomic interactions	1033	Vismodegib	SMO	FBXW7_mut	UCEC	3	8	0.0045838	0.0504218	-0.642873	1.29738	0.0351521	0.386673	-0.00352925	0.412656
Other pharmacogenomic interactions	1046	681640	WEE1, CHEK1	gain:cnaHNSC14 (ASXL1)	HNSC	4	26	0.00252566	0.0505132	-1.88416	1.2966	0.00199667	0.0399335	-1.88985	1.39866
Other pharmacogenomic interactions	1264	SGC0946	DOT1L	loss:cnaCOREAD21	COREAD	3	46	0.000622775	0.0516903	-2.25753	1.28659	0.0125784	0.544489	-1.65707	0.264011
Other pharmacogenomic interactions	1203	QL-XII-61	BMX, BTK	ASXL2_mut	COREAD	3	36	0.00134409	0.0524196	-2.30135	1.28051	0.0274244	0.381013	-1.658	0.41906
Other pharmacogenomic interactions	1261	rTRAIL	TRAIL receptor agonist	gain:cnaBRCA48	BRCA	5	47	0.00105463	0.0527316	-1.45775	1.27793	0.000269346	0.0134673	-1.38364	1.87072
Other pharmacogenomic interactions	1060	PD0325901	MEK1, MEK2	ARID1A_mut	DLBC	3	32	0.0132442	0.0529769	-1.64991	1.27591	0.0694172	0.277669	-1.27873	0.556473
Other pharmacogenomic interactions	207	AS601245	JNK1, JNK2, JNK2	loss:cnaKIRC12	KIRC	6	24	0.0111646	0.0530317	-0.628594	1.27546	0.044457	0.211171	-0.340017	0.675366
Other pharmacogenomic interactions	207	AS601245	JNK1, JNK2, JNK2	loss:cnaKIRC13	KIRC	6	24	0.0111646	0.0530317	-0.628594	1.27546	0.044457	0.211171	-0.340017	0.675366
Other pharmacogenomic interactions	207	AS601245	JNK1, JNK2, JNK2	loss:cnaKIRC14	KIRC	6	24	0.0111646	0.0530317	-0.628594	1.27546	0.044457	0.211171	-0.340017	0.675366
Other pharmacogenomic interactions	207	AS601245	JNK1, JNK2, JNK2	loss:cnaKIRC15	KIRC	6	24	0.0111646	0.0530317	-0.628594	1.27546	0.044457	0.211171	-0.340017	0.675366
Other pharmacogenomic interactions	253	XMD14-99	ALK, CDK7, LTK, others	loss:cnaGBM100	GBM	3	35	0.0257357	0.0530798	-1.41931	1.27507	0.122366	0.201903	-1.0115	0.694857
Other pharmacogenomic interactions	253	XMD14-99	ALK, CDK7, LTK, others	loss:cnaGBM102	GBM	3	35	0.0257357	0.0530798	-1.41931	1.27507	0.122366	0.201903	-1.0115	0.694857
Other pharmacogenomic interactions	253	XMD14-99	ALK, CDK7, LTK, others	loss:cnaGBM103	GBM	3	35	0.0257357	0.0530798	-1.41931	1.27507	0.122366	0.201903	-1.0115	0.694857
Other pharmacogenomic interactions	253	XMD14-99	ALK, CDK7, LTK, others	loss:cnaGBM104	GBM	3	35	0.0257357	0.0530798	-1.41931	1.27507	0.122366	0.201903	-1.0115	0.694857
Other pharmacogenomic interactions	253	XMD14-99	ALK, CDK7, LTK, others	loss:cnaGBM105	GBM	3	35	0.0257357	0.0530798	-1.41931	1.27507	0.122366	0.201903	-1.0115	0.694857
Other pharmacogenomic interactions	253	XMD14-99	ALK, CDK7, LTK, others	loss:cnaGBM106	GBM	3	35	0.0257357	0.0530798	-1.41931	1.27507	0.122366	0.201903	-1.0115	0.694857
Other pharmacogenomic interactions	253	XMD14-99	ALK, CDK7, LTK, others	loss:cnaGBM132	GBM	3	35	0.0163143	0.0530798	-1.52622	1.27507	0.114334	0.201903	-1.03316	0.694857
Other pharmacogenomic interactions	253	XMD14-99	ALK, CDK7, LTK, others	loss:cnaGBM134	GBM	3	35	0.0255728	0.0530798	-1.42083	1.27507	0.0247365	0.201903	-1.46885	0.694857
Other pharmacogenomic interactions	253	XMD14-99	ALK, CDK7, LTK, others	loss:cnaGBM135	GBM	3	35	0.0255728	0.0530798	-1.42083	1.27507	0.0247365	0.201903	-1.46885	0.694857
Other pharmacogenomic interactions	253	XMD14-99	ALK, CDK7, LTK, others	loss:cnaGBM45	GBM	3	35	0.00882781	0.0530798	-1.66342	1.27507	0.0981219	0.201903	-1.08102	0.694857
Other pharmacogenomic interactions	253	XMD14-99	ALK, CDK7, LTK, others	loss:cnaGBM97	GBM	3	35	0.0257357	0.0530798	-1.41931	1.27507	0.122366	0.201903	-1.0115	0.694857
Other pharmacogenomic interactions	253	XMD14-99	ALK, CDK7, LTK, others	loss:cnaGBM98	GBM	3	35	0.0257357	0.0530798	-1.41931	1.27507	0.122366	0.201903	-1.0115	0.694857
Other pharmacogenomic interactions	253	XMD14-99	ALK, CDK7, LTK, others	loss:cnaGBM99 (ANK3)	GBM	3	35	0.0257357	0.0530798	-1.41931	1.27507	0.122366	0.201903	-1.0115	0.694857
Other pharmacogenomic interactions	253	XMD14-99	ALK, CDK7, LTK, others	loss:cnaGBM1	GBM	3	35	0.00312364	0.0530798	-1.88152	1.27507	0.16715	0.250725	-0.908309	0.600802
Other pharmacogenomic interactions	1011	Navitoclax	BCL2, BCL-XL, BCL-W	CREBBP_mut	DLBC	7	32	0.0132816	0.0531265	-1.13607	1.27469	0.00977036	0.058271	-1.13874	1.23455
Other pharmacogenomic interactions	331	QL-X-138	BTK	PTEN_mut	UCEC	6	9	0.00759683	0.0531778	-1.07833	1.27427	0.00982244	0.0687571	-1.10891	1.16268
Other pharmacogenomic interactions	341	Selisistat	SIRT1	loss:cnaSKCM26	SKCM	3	52	0.00221891	0.0532538	-1.52343	1.27365	0.0133275	0.15993	-1.48826	0.79607
Other pharmacogenomic interactions	288	WHI-P97	JAK3	loss:cnaGBM100	GBM	3	35	0.014562	0.0533942	-1.43155	1.27251	0.0701516	0.185462	-0.89859	0.731746
Other pharmacogenomic interactions	288	WHI-P97	JAK3	loss:cnaGBM102	GBM	3	35	0.014562	0.0533942	-1.43155	1.27251	0.0701516	0.185462	-0.89859	0.731746
Other pharmacogenomic interactions	288	WHI-P97	JAK3	loss:cnaGBM103	GBM	3	35	0.014562	0.0533942	-1.43155	1.27251	0.0701516	0.185462	-0.89859	0.731746
Other pharmacogenomic interactions	288	WHI-P97	JAK3	loss:cnaGBM104	GBM	3	35	0.014562	0.0533942	-1.43155	1.27251	0.0701516	0.185462	-0.89859	0.731746
Other pharmacogenomic interactions	288	WHI-P97	JAK3	loss:cnaGBM105	GBM	3	35	0.014562	0.0533942	-1.43155	1.27251	0.0701516	0.185462	-0.89859	0.731746
Other pharmacogenomic interactions	288	WHI-P97	JAK3	loss:cnaGBM106	GBM	3	35	0.014562	0.0533942	-1.43155	1.27251	0.0701516	0.185462	-0.89859	0.731746
Other pharmacogenomic interactions	288	WHI-P97	JAK3	loss:cnaGBM97	GBM	3	35	0.014562	0.0533942	-1.43155	1.27251	0.0701516	0.185462	-0.89859	0.731746
Other pharmacogenomic interactions	288	WHI-P97	JAK3	loss:cnaGBM98	GBM	3	35	0.014562	0.0533942	-1.43155	1.27251	0.0701516	0.185462	-0.89859	0.731746
Other pharmacogenomic interactions	288	WHI-P97	JAK3	loss:cnaGBM99 (ANK3)	GBM	3	35	0.014562	0.0533942	-1.43155	1.27251	0.0701516	0.185462	-0.89859	0.731746
Other pharmacogenomic interactions	1114	Cetuximab	EGFR	loss:cnaLGG7 (RPL22)	LGG	3	16	0.00764351	0.0535046	-2.17317	1.27161	0.0805663	0.563964	0.76355	-0.248749
Other pharmacogenomic interactions	94	TGX221	PI3Kbeta	gain:cnaSKCM12 (KRAS)	SKCM	4	17	0.00595868	0.0536281	-0.564228	1.27061	0.0401404	0.361264	-0.285202	0.442175
Other pharmacogenomic interactions	1072	Avagacestat	Amyloid beta20, Amyloid beta40	TP53_mut	KIRC	11	31	0.00268204	0.0536408	-1.12554	1.2705	0.00541537	0.108307	-0.962018	0.965342
Other pharmacogenomic interactions	180	Thapsigargin	SERCA	TP53_mut	BLCA	15	19	0.00448422	0.0538107	-1.8951	1.26913	0.0181368	0.217642	-1.52197	0.662258
Other pharmacogenomic interactions	211	TL-2-105	not defined	loss:cnaKIRC23	KIRC	4	31	0.00257037	0.0539778	-1.57043	1.26778	0.57983	0.966208	-0.239165	0.0149293
Other pharmacogenomic interactions	55	A-770041	LCK, FYN	loss:cnaSTAD13	STAD	3	7	0.0273336	0.0546671	-2.1874	1.26227	0.0832643	0.166529	-1.97553	0.778511
Other pharmacogenomic interactions	300	CX-5461	RNA Polymerase 1	loss:cnaESCA1	ESCA	6	35	0.00606	0.0552809	-1.62266	1.25743	0.00338948	0.0542317	-1.58294	1.26575
Other pharmacogenomic interactions	300	CX-5461	RNA Polymerase 1	SMAD4_mut	ESCA	4	35	0.00691011	0.0552809	-1.18619	1.25743	0.0127696	0.102157	-1.04022	0.990731
Other pharmacogenomic interactions	293	Amuvatinib	KIT, PDGFRA, FLT3	gain:cnaESCA7 (ERBB2)	ESCA	10	35	0.0034587	0.0553392	-1.05927	1.25697	0.0198981	0.318369	-0.713066	0.497069
Other pharmacogenomic interactions	1028	VX-702	p38	gain:cnaHNSC14 (ASXL1)	HNSC	4	34	0.00266165	0.0558947	-1.5358	1.25263	0.0861584	0.452331	-0.837796	0.344543
Other pharmacogenomic interactions	197	Bryostatin 1	PKC	RB1_mut	GBM	5	30	0.00233834	0.0561203	-1.72202	1.25088	0.040022	0.480265	-1.0997	0.318519
Other pharmacogenomic interactions	1072	Avagacestat	Amyloid beta20, Amyloid beta40	BPTF_mut	COREAD	3	46	0.000681548	0.0565685	-2.71328	1.24743	0.119308	0.957181	0.561133	-0.0190061
Other pharmacogenomic interactions	147	NSC-87877	SHP-1 (PTPN6), SHP-2 (PTPN11)	APC_mut	STAD	3	20	0.00282991	0.0565982	-1.58466	1.2472	0.000594237	0.0118847	-2.259	1.92501
Other pharmacogenomic interactions	230	GSK429286A	ROCK1, ROCK2	loss:cnaBRCA25 (ARID1B,MAP3K4,MLLT4)	BRCA	6	49	0.00341028	0.0567342	-1.15976	1.24615	0.00208107	0.0530673	-1.0768	1.27517
Other pharmacogenomic interactions	230	GSK429286A	ROCK1, ROCK2	loss:cnaBRCA24	BRCA	3	49	0.00488816	0.0567342	-1.62702	1.24615	0.0167906	0.285441	-1.13033	0.544484
Other pharmacogenomic interactions	230	GSK429286A	ROCK1, ROCK2	loss:cnaBRCA23	BRCA	3	49	0.0033987	0.0567342	-1.7003	1.24615	0.0522107	0.386256	-0.874397	0.413125
Other pharmacogenomic interactions	230	GSK429286A	ROCK1, ROCK2	loss:cnaBRCA22 (SYNCRIP,ZNF292)	BRCA	19	49	0.00556218	0.0567342	-0.888857	1.24615	0.275168	0.755612	-0.202926	0.121701
Other pharmacogenomic interactions	147	NSC-87877	SHP-1 (PTPN6), SHP-2 (PTPN11)	MLL2_mut	COREAD	11	39	0.00151766	0.0569122	-0.0436519	1.24479	0.0306195	0.932068	-0.333065	0.0305525
Other pharmacogenomic interactions	1194	SB-505124	ALK4, ALK5	CASP8_mut	HNSC	6	39	0.00914408	0.0571505	-1.37588	1.24298	0.0379406	0.237129	-1.06708	0.625016
Other pharmacogenomic interactions	1194	SB-505124	ALK4, ALK5	PIK3CA_mut	HNSC	8	39	0.00692379	0.0571505	-1.22913	1.24298	0.140531	0.439159	-0.668761	0.357378
Other pharmacogenomic interactions	221	TAK-715	p38alpha, p38beta	loss:cnaKIRC12	KIRC	12	31	0.0136343	0.057264	-0.601577	1.24212	0.233523	0.482385	-0.0213387	0.316606
Other pharmacogenomic interactions	221	TAK-715	p38alpha, p38beta	loss:cnaKIRC13	KIRC	12	31	0.0136343	0.057264	-0.601577	1.24212	0.233523	0.482385	-0.0213387	0.316606
Other pharmacogenomic interactions	221	TAK-715	p38alpha, p38beta	loss:cnaKIRC14	KIRC	12	31	0.0136343	0.057264	-0.601577	1.24212	0.233523	0.482385	-0.0213387	0.316606
Other pharmacogenomic interactions	221	TAK-715	p38alpha, p38beta	loss:cnaKIRC15	KIRC	12	31	0.0136343	0.057264	-0.601577	1.24212	0.233523	0.482385	-0.0213387	0.316606
Other pharmacogenomic interactions	221	TAK-715	p38alpha, p38beta	loss:cnaKIRC23	KIRC	4	31	0.012211	0.057264	-1.10905	1.24212	0.186139	0.482385	-0.305187	0.316606
Other pharmacogenomic interactions	221	TAK-715	p38alpha, p38beta	EGFR_mut	LUAD	5	61	0.00137939	0.0579342	-1.61506	1.23706	0.000915358	0.038445	-1.64698	1.41516
Other pharmacogenomic interactions	221	TAK-715	p38alpha, p38beta	loss:cnaBRCA25 (ARID1B,MAP3K4,MLLT4)	BRCA	6	49	0.00113713	0.0579938	-1.33456	1.23662	0.0219888	0.386752	-0.833169	0.412567
Other pharmacogenomic interactions	1005	Cisplatin	DNA crosslinker	PTEN_mut	BRCA	7	45	0.00123471	0.0580313	-1.22933	1.23634	0.0372916	0.438177	-0.700118	0.358351
Other pharmacogenomic interactions	1067	CCT007093	PPM1D	gain:cnaESCA9 (EGFR)	ESCA	8	35	0.00362857	0.0580571	-1.16344	1.23614	0.0607944	0.324237	-0.538085	0.489138
Other pharmacogenomic interactions	197	Bryostatin 1	PKC	loss:cnaOV27	OV	3	19	0.00830483	0.0581338	-1.72024	1.23557	0.242446	0.565708	-0.853408	0.247408
Other pharmacogenomic interactions	197	Bryostatin 1	PKC	loss:cnaOV28	OV	3	19	0.00830483	0.0581338	-1.72024	1.23557	0.242446	0.565708	-0.853408	0.247408
Other pharmacogenomic interactions	197	Bryostatin 1	PKC	loss:cnaOV29	OV	3	19	0.00830483	0.0581338	-1.72024	1.23557	0.242446	0.565708	-0.853408	0.247408
Other pharmacogenomic interactions	197	Bryostatin 1	PKC	loss:cnaOV30	OV	3	19	0.00830483	0.0581338	-1.72024	1.23557	0.242446	0.565708	-0.853408	0.247408
Other pharmacogenomic interactions	197	Bryostatin 1	PKC	SMAD4_mut	OV	3	19	0.00169792	0.0581338	-2.12444	1.23557	0.415479	0.669413	-0.615724	0.174306
Other pharmacogenomic interactions	1050	ZM447439	AURKA, AURKB	ASXL1_mut	LAML	3	23	0.0116453	0.0582267	-1.40441	1.23488	0.033764	0.16882	-1.21478	0.772576
Other pharmacogenomic interactions	282	Pelitinib	EGFR	SMAD4_mut	HNSC	6	40	0.00234204	0.0585511	-1.46996	1.23247	0.00809843	0.202461	-1.26152	0.693659
Other pharmacogenomic interactions	94	TGX221	PI3Kbeta	gain:cnaBRCA14 (RAD21)	BRCA	6	14	0.00326615	0.0587907	-2.49632	1.23069	0.0329806	0.296825	-1.77427	0.527499
Other pharmacogenomic interactions	333	T0901317	LXR, FXR	loss:cnaBRCA25 (ARID1B,MAP3K4,MLLT4)	BRCA	5	48	0.00122535	0.0588167	-1.47371	1.2305	0.0198528	0.448648	-0.865097	0.348094
Other pharmacogenomic interactions	1372	Trametinib	MEK1, MEK2	loss:cnaGBM2 (CDKN2A)	GBM	26	34	0.00179152	0.0591202	-1.19635	1.22826	0.00114344	0.0377334	-1.20303	1.42327
Other pharmacogenomic interactions	1219	PFI-1	BRD4	loss:cnaLUSC4	LUSC	7	15	0.0197943	0.059383	-1.44536	1.22634	0.101932	0.229348	-1.0167	0.639505
Other pharmacogenomic interactions	286	KIN001-236	Angiopoietin-1 receptor	loss:cnaOV57 (ZNRF3)	OV	4	32	0.000946862	0.0596523	-1.93785	1.22437	0.108985	0.653236	-0.841323	0.18493
Other pharmacogenomic interactions	235	QL-XII-47	BTK, BMX	loss:cnaKIRC12	KIRC	12	31	0.0199856	0.0599569	-0.359664	1.22216	0.0523834	0.137506	-0.181762	0.861677
Other pharmacogenomic interactions	235	QL-XII-47	BTK, BMX	loss:cnaKIRC13	KIRC	12	31	0.0199856	0.0599569	-0.359664	1.22216	0.0523834	0.137506	-0.181762	0.861677
Other pharmacogenomic interactions	235	QL-XII-47	BTK, BMX	loss:cnaKIRC14	KIRC	12	31	0.0199856	0.0599569	-0.359664	1.22216	0.0523834	0.137506	-0.181762	0.861677
Other pharmacogenomic interactions	235	QL-XII-47	BTK, BMX	loss:cnaKIRC15	KIRC	12	31	0.0199856	0.0599569	-0.359664	1.22216	0.0523834	0.137506	-0.181762	0.861677
Other pharmacogenomic interactions	235	QL-XII-47	BTK, BMX	loss:cnaKIRC22	KIRC	10	31	0.0061473	0.0599569	-0.805453	1.22216	0.0120558	0.137506	-0.669034	0.861677
Other pharmacogenomic interactions	1259	Talazoparib	PARP1, PARP2	gain:cnaCOREAD51 (MET)	COREAD	3	46	0.000723018	0.0600105	-1.45871	1.22177	0.000669115	0.0555365	-1.31551	1.25542
Other pharmacogenomic interactions	292	Masitinib	KIT, PDGFRA, PDGFRB	VHL_mut	KIRC	11	31	0.020358	0.061074	-0.891976	1.21414	0.0430954	0.129286	-0.745622	0.888448
Other pharmacogenomic interactions	1011	Navitoclax	BCL2, BCL-XL, BCL-W	loss:cnaHNSC3	HNSC	3	35	0.00255595	0.0613428	-2.08448	1.21224	0.00701076	0.168258	-1.69807	0.774024
Other pharmacogenomic interactions	94	TGX221	PI3Kbeta	MECOM_mut	SKCM	3	17	0.0136469	0.061411	-1.17041	1.21175	0.136216	0.612972	-0.700585	0.212559
Other pharmacogenomic interactions	1047	Nutlin-3a (-)	MDM2	KRAS_mut	LUAD	17	54	0.00341247	0.0614245	-0.967799	1.21166	0.00447775	0.0805994	-0.851736	1.09367
Other pharmacogenomic interactions	1259	Talazoparib	PARP1, PARP2	loss:cnaLIHC7 (CDKN2A)	LIHC	4	16	0.0411536	0.0617304	-1.03681	1.2095	0.0912446	0.136867	-0.836902	0.863702
Other pharmacogenomic interactions	154	CHIR-99021	GSK3A, GSK3B	loss:cnaKIRC3	KIRC	3	24	0.0227778	0.0618254	-1.69477	1.20883	0.00867906	0.0206128	-1.19676	1.68586
Other pharmacogenomic interactions	154	CHIR-99021	GSK3A, GSK3B	loss:cnaKIRC4	KIRC	3	24	0.0227778	0.0618254	-1.69477	1.20883	0.00867906	0.0206128	-1.19676	1.68586
Other pharmacogenomic interactions	258	STF-62247	Autophagy inducer	CDH1_mut	BRCA	4	49	0.00544583	0.0619165	-1.79694	1.20819	0.0799186	0.582264	-1.24072	0.23488
Other pharmacogenomic interactions	258	STF-62247	Autophagy inducer	loss:cnaBRCA24	BRCA	3	49	0.00607025	0.0619165	-1.21035	1.20819	0.0737942	0.582264	-0.579075	0.23488
Other pharmacogenomic interactions	211	TL-2-105	not defined	NRAS_mut	SKCM	11	52	0.00258652	0.0620765	-1.0301	1.20707	0.00474167	0.1138	-0.918894	0.943858
Other pharmacogenomic interactions	304	SB52334	ALK5	loss:cnaESCA1	ESCA	6	35	0.00394854	0.0631766	-1.06412	1.19944	0.00999354	0.159897	-1.04114	0.796161
Other pharmacogenomic interactions	1009	Tretinoin	Retinoic acid	loss:cnaLUSC17 (FAT1,IRF2)	LUSC	6	13	0.00529812	0.0635774	-2.08723	1.1967	0.0979565	0.536675	-1.06473	0.270288
Other pharmacogenomic interactions	279	BIX02189	MEK5, ERK5	loss:cnaOV87	OV	3	32	0.00403679	0.0635794	-1.97123	1.19668	0.0105931	0.113889	-1.64049	0.943518
Other pharmacogenomic interactions	279	BIX02189	MEK5, ERK5	loss:cnaOV88	OV	3	32	0.00403679	0.0635794	-1.97123	1.19668	0.0105931	0.113889	-1.64049	0.943518
Other pharmacogenomic interactions	225	Genentech Cpd 10	AURKA, AURKB	TP53_mut	LIHC	12	17	0.0213479	0.0640438	-1.41577	1.19352	0.099004	0.148506	-0.96473	0.828256
Other pharmacogenomic interactions	1010	Gefitinib	EGFR	TP53_mut	HNSC	30	34	0.00362726	0.0644728	-1.69137	1.19062	0.000257412	0.00540565	-2.20421	2.26715
Other pharmacogenomic interactions	1010	Gefitinib	EGFR	gain:cnaHNSC2 (EGFR)	HNSC	8	34	0.0069678	0.0644728	-1.12679	1.19062	0.0150313	0.157829	-1.0011	0.801814
Other pharmacogenomic interactions	310	YM201636	PYKFYVE	loss:cnaGBM47	GBM	6	35	0.0235011	0.0646281	-0.688957	1.18958	0.0246576	0.133491	-0.63599	0.874547
Other pharmacogenomic interactions	166	FTI-277	Farnesyl-transferase (FNTA)	loss:cnaSKCM26	SKCM	3	51	0.00843294	0.0646525	-1.02453	1.18941	0.00438156	0.100776	-1.25881	0.996644
Other pharmacogenomic interactions	1262	UNC1215	L3MBTL3	loss:cnaOV57 (ZNRF3)	OV	4	33	0.00153845	0.0646652	-1.66285	1.18933	0.420882	0.728013	0.55204	-0.137861
Other pharmacogenomic interactions	1262	UNC1215	L3MBTL3	loss:cnaOV58	OV	5	33	0.00195955	0.0646652	-1.57259	1.18933	0.269778	0.640681	0.678662	-0.193358
Other pharmacogenomic interactions	156	AZD6482	PI3Kbeta	ASPM_mut	COREAD	4	39	0.000863364	0.0647523	-2.84329	1.18874	0.10939	0.857657	-1.67265	0.0666864
Other pharmacogenomic interactions	1039	SL0101	RSK, AURKB, PIM1, PIM3	gain:cnaCOREAD36	COREAD	3	40	0.00101285	0.0653171	-1.97332	1.18497	0.073961	0.464482	-1.11003	0.333031
Other pharmacogenomic interactions	1023	GW441756	NTRK1	loss:cnaSKCM5 (PAX5)	SKCM	3	46	0.00343956	0.0653516	-1.70134	1.18474	0.227253	0.64775	-0.508906	0.188593
Other pharmacogenomic interactions	166	FTI-277	Farnesyl-transferase (FNTA)	MLL2_mut	COREAD	11	39	0.00174295	0.0653607	-0.0613773	1.18468	0.202536	0.78391	-0.380993	0.105734
Other pharmacogenomic interactions	135	Gemcitabine	Pyrimidine antimetabolite	gain:cnaLGG16 (EGFR)	LGG	5	16	0.0280825	0.0655259	-1.37419	1.18359	0.00962037	0.0224475	-1.66999	1.64883
Other pharmacogenomic interactions	231	FMK	RSK	MLL3_mut	BRCA	3	49	0.00129666	0.0661296	-1.91323	1.1796	0.0388675	0.938268	-0.963063	0.0276729
Other pharmacogenomic interactions	1262	UNC1215	L3MBTL3	loss:cnaOV59	OV	4	33	0.00303138	0.0666903	-1.80166	1.17594	0.13539	0.516331	0.958798	-0.287072
Other pharmacogenomic interactions	252	WZ3105	SRC, ROCK2, NTRK2, FLT3, IRAK1, others	gain:cnaESCA2 (KRAS)	ESCA	3	35	0.0083828	0.0670624	-0.827026	1.17352	0.0231902	0.123681	-0.760582	0.907696
Other pharmacogenomic interactions	252	WZ3105	SRC, ROCK2, NTRK2, FLT3, IRAK1, others	gain:cnaESCA3 (KRAS)	ESCA	3	35	0.0083828	0.0670624	-0.827026	1.17352	0.0231902	0.123681	-0.760582	0.907696
Other pharmacogenomic interactions	276	CAY10603	HDAC1, HDAC6	gain:cnaESCA2 (KRAS)	ESCA	3	35	0.00840198	0.0672159	-0.675422	1.17253	0.0420048	0.336038	-0.475475	0.473611
Other pharmacogenomic interactions	276	CAY10603	HDAC1, HDAC6	gain:cnaESCA3 (KRAS)	ESCA	3	35	0.00840198	0.0672159	-0.675422	1.17253	0.0420048	0.336038	-0.475475	0.473611
Other pharmacogenomic interactions	1021	Axitinib	PDGFR, KIT, VEGFR	EP300_mut	ESCA	3	31	0.00449643	0.0674464	-1.52703	1.17104	0.846229	0.959002	0.0640113	-0.0181805
Other pharmacogenomic interactions	184	BMS-754807	IGF1R, IR	loss:cnaKIRC12	KIRC	6	24	0.0142179	0.0675352	-0.603097	1.17047	0.0174381	0.0662647	-0.526558	1.17872
Other pharmacogenomic interactions	184	BMS-754807	IGF1R, IR	loss:cnaKIRC13	KIRC	6	24	0.0142179	0.0675352	-0.603097	1.17047	0.0174381	0.0662647	-0.526558	1.17872
Other pharmacogenomic interactions	184	BMS-754807	IGF1R, IR	loss:cnaKIRC14	KIRC	6	24	0.0142179	0.0675352	-0.603097	1.17047	0.0174381	0.0662647	-0.526558	1.17872
Other pharmacogenomic interactions	184	BMS-754807	IGF1R, IR	loss:cnaKIRC15	KIRC	6	24	0.0142179	0.0675352	-0.603097	1.17047	0.0174381	0.0662647	-0.526558	1.17872
Other pharmacogenomic interactions	326	GSK690693	AKT1, AKT2, AKT3	EP300_mut	COREAD	15	46	0.0070751	0.0676547	-0.889188	1.1697	0.00904294	0.113683	-1.02896	0.944306
Other pharmacogenomic interactions	326	GSK690693	AKT1, AKT2, AKT3	PIK3R1_mut	COREAD	6	46	0.00768803	0.0676547	-1.50721	1.1697	0.0645684	0.36489	-1.25366	0.437838
Other pharmacogenomic interactions	238	Idelalisib	PI3Kdelta	LPHN2_mut	COREAD	4	46	0.000771461	0.0678886	-1.99053	1.1682	0.00331859	0.292036	-1.76097	0.534564
Other pharmacogenomic interactions	178	BAY-61-3606	SYK	RB1_mut	BLCA	6	19	0.00566475	0.0679769	-1.41192	1.16764	0.0026971	0.0323652	-1.56032	1.48992
Other pharmacogenomic interactions	1261	rTRAIL	TRAIL receptor agonist	BRWD1_mut	COREAD	3	47	0.000793808	0.0682675	-2.24804	1.16579	7.17633e-05	0.00617164	-2.42096	2.2096
Other pharmacogenomic interactions	211	TL-2-105	not defined	loss:cnaKIRC24 (FAT1,IRF2)	KIRC	8	31	0.00981667	0.0687167	-1.05224	1.16294	0.940152	0.966208	0.0909439	-0.0149293
Other pharmacogenomic interactions	150	Bicalutamide	AR	KDM6A_mut	COREAD	3	38	0.00132778	0.0687527	-2.18456	1.16271	0.237598	0.869224	-1.18645	0.0608683
Other pharmacogenomic interactions	150	Bicalutamide	AR	NR4A2_mut	COREAD	4	38	0.00214036	0.0687527	-1.8007	1.16271	0.392694	0.869224	-0.779021	0.0608683
Other pharmacogenomic interactions	1046	681640	WEE1, CHEK1	TP53_mut	SKCM	12	41	0.00328648	0.0690162	-0.996174	1.16105	0.00935499	0.196455	-0.917284	0.706738
Other pharmacogenomic interactions	1039	SL0101	RSK, AURKB, PIM1, PIM3	ARID1B_mut	UCEC	3	8	0.00692396	0.0692396	-0.598529	1.15965	0.613411	0.698942	0.477901	-0.155559
Other pharmacogenomic interactions	3	Rapamycin	MTORC1	loss:cnaSTAD13	STAD	3	7	0.0348097	0.0696194	-2.17448	1.15727	0.0191214	0.0382428	-2.74219	1.41745
Other pharmacogenomic interactions	1023	GW441756	NTRK1	TP53_mut	LIHC	10	14	0.0348135	0.0696271	-1.44607	1.15722	0.323708	0.647416	-1.03236	0.188817
Other pharmacogenomic interactions	1008	Methotrexate	Antimetabolite	SMAD4_mut	ESCA	4	31	0.00464386	0.0696579	-1.78304	1.15703	0.0106511	0.159766	-1.56654	0.796515
Other pharmacogenomic interactions	1373	Dabrafenib	BRAF	NF2_mut	KIRC	5	28	0.00388487	0.0699276	-1.97392	1.15535	0.000933781	0.0168081	-2.23538	1.77448
Other pharmacogenomic interactions	185	Linsitinib	IGF1R	NRAS_mut	SKCM	11	50	0.00613369	0.0705374	-0.956993	1.15158	0.00536116	0.0616533	-1.0621	1.21004
Other pharmacogenomic interactions	299	OSI-027	MTORC1, MTORC2	PTEN_mut	UCEC	6	9	0.0100883	0.0706182	-0.776045	1.15108	0.0409667	0.286767	-0.809435	0.542471
Other pharmacogenomic interactions	1053	MK-2206	AKT1, AKT2	ARID2_mut	SKCM	3	40	0.00353566	0.0707132	-1.30498	1.1505	0.00943487	0.188697	-1.49049	0.724234
Other pharmacogenomic interactions	223	ZSTK474	PI3K (class 1)	loss:cnaSTAD48 (FAT1,IRF2)	STAD	8	21	0.00321548	0.0707405	-1.62597	1.15033	0.00354825	0.0780616	-1.5874	1.10756
Other pharmacogenomic interactions	330	XMD13-2	RIPK1	loss:cnaKIRC16	KIRC	6	31	0.00678135	0.0712042	-1.21709	1.14749	0.0100057	0.210119	-1.05933	0.677534
Other pharmacogenomic interactions	330	XMD13-2	RIPK1	loss:cnaKIRC23	KIRC	4	31	0.00342885	0.0712042	-1.42781	1.14749	0.0846004	0.496775	-0.650601	0.30384
Other pharmacogenomic interactions	1036	PLX-4720	BRAF	gain:cnaSKCM21 (FOXP1,MITF)	SKCM	7	43	0.0102	0.0713997	-0.991944	1.1463	0.0154393	0.108075	-0.944461	0.966273
Other pharmacogenomic interactions	271	VNLG/124	HDAC,RAR	loss:cnaHNSC19 (MED17)	HNSC	5	40	0.00285651	0.0714126	-1.55413	1.14622	0.917655	0.97503	-0.032861	0.0109819
Other pharmacogenomic interactions	252	WZ3105	SRC, ROCK2, NTRK2, FLT3, IRAK1, others	PTEN_mut	UCEC	6	9	0.010207	0.0714493	-2.81416	1.146	0.0303591	0.212514	-2.28186	0.672613
Other pharmacogenomic interactions	1011	Navitoclax	BCL2, BCL-XL, BCL-W	loss:cnaLUSC17 (FAT1,IRF2)	LUSC	6	13	0.00651599	0.0716758	-1.68405	1.14463	0.00633788	0.0697167	-1.88951	1.15666
Other pharmacogenomic interactions	30	Sorafenib	PDGFR, KIT, VEGFR, RAF	TP53_mut	LGG	8	11	0.0358773	0.0717547	-1.0054	1.14415	0.126902	0.158156	-0.77066	0.800914
Other pharmacogenomic interactions	254	Quizartinib	FLT3	loss:cnaGBM101	GBM	5	35	0.0240651	0.0721953	-1.14684	1.14149	0.0518777	0.123432	-0.966257	0.908572
Other pharmacogenomic interactions	1143	HG-5-88-01	EGFR, ADCK4	gain:cnaBRCA58 (CCND1)	BRCA	5	26	0.00222301	0.0733595	-1.96219	1.13454	0.275916	0.702752	-0.70821	0.153198
Other pharmacogenomic interactions	288	WHI-P97	JAK3	ARID1A_mut	DLBC	3	29	0.00918649	0.0734919	-1.91136	1.13376	0.329461	0.827033	-0.742819	0.082477
Other pharmacogenomic interactions	89	Parthenolide	HDAC1	KRAS_mut	LUAD	4	13	0.0122548	0.0735288	-1.39983	1.13354	0.0317631	0.0952894	-1.51325	1.02096
Other pharmacogenomic interactions	1230	IOX2	EGLN1	RB1_mut	LGG	7	17	0.0105462	0.0738232	-1.51328	1.13181	0.072673	0.13184	-0.992332	0.879952
Other pharmacogenomic interactions	1133	Serdemetan	MDM2	loss:cnaGBM19 (FAT1,IRF2)	GBM	6	34	0.00447615	0.0738565	-1.26274	1.13161	0.00724591	0.239115	-1.11597	0.621393
Other pharmacogenomic interactions	254	Quizartinib	FLT3	gain:cnaGBM123 (EGFR)	GBM	10	35	0.0269794	0.0741934	-0.857238	1.12963	0.0695365	0.143419	-0.685916	0.843393
Other pharmacogenomic interactions	166	FTI-277	Farnesyl-transferase (FNTA)	NRAS_mut	SKCM	11	51	0.0161332	0.0742127	-0.631253	1.12952	0.022288	0.170875	-0.629295	0.767322
Other pharmacogenomic interactions	288	WHI-P97	JAK3	EGFR_mut	LUAD	5	61	0.00176749	0.0742347	-1.50971	1.12939	0.000885982	0.0372112	-1.63489	1.42933
Other pharmacogenomic interactions	186	Bexarotene	Retinioic X receptor (RXR) agonist	MECOM_mut	COREAD	3	38	0.00201125	0.0744163	-2.83196	1.12833	0.106682	0.528628	-1.73108	0.27685
Other pharmacogenomic interactions	253	XMD14-99	ALK, CDK7, LTK, others	loss:cnaOV35	OV	5	32	0.00994554	0.0749006	-0.934037	1.12551	0.428793	0.969175	-0.0935048	0.0135979
Other pharmacogenomic interactions	253	XMD14-99	ALK, CDK7, LTK, others	SMARCA4_mut	OV	3	32	0.00849546	0.0749006	-2.08019	1.12551	0.048559	0.969175	-1.64109	0.0135979
Other pharmacogenomic interactions	253	XMD14-99	ALK, CDK7, LTK, others	loss:cnaOV16	OV	6	32	0.00817454	0.0749006	-0.765546	1.12551	0.785517	0.969175	0.194734	-0.0135979
Other pharmacogenomic interactions	253	XMD14-99	ALK, CDK7, LTK, others	loss:cnaOV17	OV	6	32	0.00817454	0.0749006	-0.765546	1.12551	0.785517	0.969175	0.194734	-0.0135979
Other pharmacogenomic interactions	253	XMD14-99	ALK, CDK7, LTK, others	loss:cnaOV33 (ZFHX3)	OV	4	32	0.0107001	0.0749006	-1.17966	1.12551	0.824188	0.969175	0.0896119	-0.0135979
Other pharmacogenomic interactions	1030	KU-55933	ATM	PTEN_mut	BRCA	5	42	0.001633	0.0751178	-1.92636	1.12426	0.0016062	0.073885	-1.82203	1.13144
Other pharmacogenomic interactions	211	TL-2-105	not defined	loss:cnaGBM101	GBM	5	35	0.0364362	0.0751497	-0.960006	1.12407	0.0164259	0.0542055	-1.07279	1.26596
Other pharmacogenomic interactions	211	TL-2-105	not defined	loss:cnaGBM132	GBM	3	35	0.0356545	0.0751497	-1.26297	1.12407	0.263636	0.3625	-0.62092	0.440692
Other pharmacogenomic interactions	275	I-BET-762	BRD2, BRD3, BRD4	SMAD4_mut	ESCA	4	35	0.00949044	0.0759235	-0.988013	1.11962	0.084559	0.398839	-0.720817	0.399203
Other pharmacogenomic interactions	1261	rTRAIL	TRAIL receptor agonist	gain:cnaESCA7 (ERBB2)	ESCA	10	33	0.00952168	0.0761735	-1.08868	1.1182	0.0112834	0.121946	-1.07583	0.913832
Other pharmacogenomic interactions	71	Pyrimethamine	Dihydrofolate reductase (DHFR)	VHL_mut	KIRC	3	10	0.00953883	0.0763107	-2.12399	1.11741	0.218606	0.836796	-0.657592	0.0773803
Other pharmacogenomic interactions	1241	CHIR-99021	GSK3A, GSK3B	loss:cnaPRAD7	PRAD	3	6	0.0764574	0.0764574	-0.311017	1.11658	0.133982	0.133982	-0.290382	0.872955
Other pharmacogenomic interactions	1053	MK-2206	AKT1, AKT2	loss:cnaSKCM26	SKCM	3	40	0.00765328	0.0765328	-0.92995	1.11615	0.0227003	0.227003	-0.648839	0.643968
Other pharmacogenomic interactions	54	CGP-082996	CDK4	RB1_mut	LGG	5	11	0.0127685	0.0766112	-1.97781	1.11571	0.0167001	0.0501004	-1.63807	1.30016
Other pharmacogenomic interactions	221	TAK-715	p38alpha, p38beta	NF1_mut	COREAD	7	46	0.00087095	0.0766436	-1.62412	1.11552	0.0176292	0.517123	-1.19324	0.286406
Other pharmacogenomic interactions	1031	Elesclomol	HSP90	loss:cnaPAAD4 (CDKN2A)	PAAD	16	25	0.0154131	0.0770653	-0.927418	1.11314	0.0287778	0.143889	-0.798249	0.841973
Other pharmacogenomic interactions	258	STF-62247	Autophagy inducer	loss:cnaSKCM22	SKCM	7	52	0.00602068	0.0776456	-1.3878	1.10988	0.195105	0.668932	-0.626401	0.174618
Other pharmacogenomic interactions	258	STF-62247	Autophagy inducer	loss:cnaSKCM23	SKCM	4	52	0.00647047	0.0776456	-1.61326	1.10988	0.144602	0.668932	-0.823192	0.174618
Other pharmacogenomic interactions	329	QL-XI-92	DDR1	loss:cnaKIRC12	KIRC	12	31	0.014796	0.0776789	-0.688282	1.1097	0.0328267	0.17234	-0.560211	0.763613
Other pharmacogenomic interactions	329	QL-XI-92	DDR1	loss:cnaKIRC13	KIRC	12	31	0.014796	0.0776789	-0.688282	1.1097	0.0328267	0.17234	-0.560211	0.763613
Other pharmacogenomic interactions	329	QL-XI-92	DDR1	loss:cnaKIRC14	KIRC	12	31	0.014796	0.0776789	-0.688282	1.1097	0.0328267	0.17234	-0.560211	0.763613
Other pharmacogenomic interactions	329	QL-XI-92	DDR1	loss:cnaKIRC15	KIRC	12	31	0.014796	0.0776789	-0.688282	1.1097	0.0328267	0.17234	-0.560211	0.763613
Other pharmacogenomic interactions	134	Etoposide	TOP2	gain:cnaLGG16 (EGFR)	LGG	5	17	0.0336746	0.0785741	-1.29001	1.10472	0.0118138	0.0275655	-1.55292	1.55963
Other pharmacogenomic interactions	1498	Selumetinib	MEK1, MEK2	loss:cnaLUSC3	LUSC	7	15	0.0349694	0.0786811	-1.03309	1.10413	0.129809	0.233657	-0.824643	0.631422
Other pharmacogenomic interactions	1219	PFI-1	BRD4	NRAS_mut	BLCA	3	19	0.00657982	0.0789578	-1.66479	1.1026	0.00840591	0.100871	-1.675	0.996234
Other pharmacogenomic interactions	238	Idelalisib	PI3Kdelta	PTEN_mut	BRCA	9	49	0.00155019	0.0790596	-1.10599	1.10205	0.00292549	0.1492	-1.07558	0.826231
Other pharmacogenomic interactions	228	AKT inhibitor VIII	AKT1, AKT2, AKT3	loss:cnaGBM100	GBM	3	35	0.0239723	0.0791085	-1.24713	1.10178	0.0985184	0.310708	-0.925302	0.507648
Other pharmacogenomic interactions	228	AKT inhibitor VIII	AKT1, AKT2, AKT3	loss:cnaGBM102	GBM	3	35	0.0239723	0.0791085	-1.24713	1.10178	0.0985184	0.310708	-0.925302	0.507648
Other pharmacogenomic interactions	228	AKT inhibitor VIII	AKT1, AKT2, AKT3	loss:cnaGBM103	GBM	3	35	0.0239723	0.0791085	-1.24713	1.10178	0.0985184	0.310708	-0.925302	0.507648
Other pharmacogenomic interactions	228	AKT inhibitor VIII	AKT1, AKT2, AKT3	loss:cnaGBM104	GBM	3	35	0.0239723	0.0791085	-1.24713	1.10178	0.0985184	0.310708	-0.925302	0.507648
Other pharmacogenomic interactions	228	AKT inhibitor VIII	AKT1, AKT2, AKT3	loss:cnaGBM105	GBM	3	35	0.0239723	0.0791085	-1.24713	1.10178	0.0985184	0.310708	-0.925302	0.507648
Other pharmacogenomic interactions	228	AKT inhibitor VIII	AKT1, AKT2, AKT3	loss:cnaGBM106	GBM	3	35	0.0239723	0.0791085	-1.24713	1.10178	0.0985184	0.310708	-0.925302	0.507648
Other pharmacogenomic interactions	228	AKT inhibitor VIII	AKT1, AKT2, AKT3	loss:cnaGBM97	GBM	3	35	0.0239723	0.0791085	-1.24713	1.10178	0.0985184	0.310708	-0.925302	0.507648
Other pharmacogenomic interactions	228	AKT inhibitor VIII	AKT1, AKT2, AKT3	loss:cnaGBM98	GBM	3	35	0.0239723	0.0791085	-1.24713	1.10178	0.0985184	0.310708	-0.925302	0.507648
Other pharmacogenomic interactions	228	AKT inhibitor VIII	AKT1, AKT2, AKT3	loss:cnaGBM99 (ANK3)	GBM	3	35	0.0239723	0.0791085	-1.24713	1.10178	0.0985184	0.310708	-0.925302	0.507648
Other pharmacogenomic interactions	228	AKT inhibitor VIII	AKT1, AKT2, AKT3	loss:cnaGBM45	GBM	3	35	0.0169472	0.0791085	-1.32792	1.10178	0.248781	0.474652	-0.622959	0.323624
Other pharmacogenomic interactions	155	Ponatinib	ABL, PDGFRA, VEGFR2, FGFR1, SRC, TIE2, FLT3	BRCA2_mut	BRCA	6	47	0.00330986	0.0794367	-1.07485	1.09998	0.0129312	0.261984	-0.702522	0.581724
Other pharmacogenomic interactions	155	Ponatinib	ABL, PDGFRA, VEGFR2, FGFR1, SRC, TIE2, FLT3	loss:cnaBRCA36 (FAT1,IRF2)	BRCA	9	47	0.00317612	0.0794367	-1.23874	1.09998	0.00643345	0.261984	-1.13963	0.581724
Other pharmacogenomic interactions	1268	XAV939	TNKS1, TNKS2	ASXL1_mut	LAML	5	26	0.0142572	0.0799367	-1.44249	1.09725	0.962166	0.962166	0.0141925	-0.0167499
Other pharmacogenomic interactions	277	Linifanib	VEGFR1, VEGFR2, VEGFR3, CSF1R, FLT3, KIT	LARP4B_mut	COREAD	5	46	0.00182878	0.0804664	-1.81113	1.09439	0.041629	0.498296	-1.42293	0.302513
Other pharmacogenomic interactions	193	GW-2580	CSF1R	BRAF_mut	LUAD	3	61	0.00232264	0.0805809	-1.92199	1.09377	0.0137723	0.289218	-1.7476	0.538774
Other pharmacogenomic interactions	193	GW-2580	CSF1R	loss:cnaLUAD14	LUAD	7	61	0.00383718	0.0805809	-1.12251	1.09377	0.00968789	0.289218	-1.15923	0.538774
Other pharmacogenomic interactions	1023	GW441756	NTRK1	ARID2_mut	SKCM	3	46	0.00854295	0.081158	-1.51048	1.09067	0.017044	0.274393	-1.18539	0.561627
Other pharmacogenomic interactions	5	Sunitinib	PDGFR, KIT, VEGFR, FLT3, RET, CSF1R	RB1_mut	LGG	5	11	0.0398202	0.0811843	-1.07574	1.09053	0.0165822	0.0497466	-1.40909	1.30324
Other pharmacogenomic interactions	184	BMS-754807	IGF1R, IR	TP53_mut	BLCA	15	19	0.0067693	0.0812316	-1.80796	1.09028	0.00868678	0.104241	-1.73724	0.98196
Other pharmacogenomic interactions	208	Ispinesib Mesylate	KSP	loss:cnaKIRC12	KIRC	12	31	0.0154939	0.0813428	-0.627675	1.08968	0.0912096	0.366958	-0.267989	0.435384
Other pharmacogenomic interactions	208	Ispinesib Mesylate	KSP	loss:cnaKIRC13	KIRC	12	31	0.0154939	0.0813428	-0.627675	1.08968	0.0912096	0.366958	-0.267989	0.435384
Other pharmacogenomic interactions	208	Ispinesib Mesylate	KSP	loss:cnaKIRC14	KIRC	12	31	0.0154939	0.0813428	-0.627675	1.08968	0.0912096	0.366958	-0.267989	0.435384
Other pharmacogenomic interactions	208	Ispinesib Mesylate	KSP	loss:cnaKIRC15	KIRC	12	31	0.0154939	0.0813428	-0.627675	1.08968	0.0912096	0.366958	-0.267989	0.435384
Other pharmacogenomic interactions	263	FR-180204	ERK1, ERK2	gain:cnaBRCA47 (EGFR)	BRCA	7	49	0.00160185	0.0816942	-1.22162	1.08781	0.0133221	0.679429	-0.92198	0.167856
Other pharmacogenomic interactions	258	STF-62247	Autophagy inducer	BRAF_mut	THCA	7	16	0.0274194	0.0822583	-1.12909	1.08482	0.234058	0.702175	-0.772599	0.153555
Other pharmacogenomic interactions	1242	(5Z)-7-Oxozeaenol	TAK1	gain:cnaGBM25 (CDK4)	GBM	4	35	0.0349206	0.0823128	-1.2189	1.08453	0.0517479	0.113845	-1.12523	0.943685
Other pharmacogenomic interactions	1166	QL-VIII-58	MTOR, ATR	TP53_mut	GBM	13	18	0.00755675	0.0831242	-1.5601	1.08027	0.00896841	0.0986525	-1.53782	1.00589
Other pharmacogenomic interactions	291	KIN001-266	MAP3K8	gain:cnaESCA2 (KRAS)	ESCA	3	35	0.0104112	0.0832898	-1.07435	1.07941	0.10762	0.372239	-0.641733	0.429178
Other pharmacogenomic interactions	291	KIN001-266	MAP3K8	gain:cnaESCA3 (KRAS)	ESCA	3	35	0.0104112	0.0832898	-1.07435	1.07941	0.10762	0.372239	-0.641733	0.429178
Other pharmacogenomic interactions	263	FR-180204	ERK1, ERK2	gain:cnaLUAD32	LUAD	3	61	0.00396969	0.0833635	-1.80736	1.07902	0.0167163	0.351041	-1.64026	0.454642
Other pharmacogenomic interactions	1054	Palbociclib	CDK4, CDK6	loss:cnaGBM2 (CDKN2A)	GBM	23	32	0.00269732	0.0836168	-1.27323	1.07771	0.000884805	0.0200704	-1.50106	1.69744
Other pharmacogenomic interactions	110	Seliciclib	CDK2, CDK7, CDK9	gain:cnaBRCA15	BRCA	6	13	0.00493103	0.0838276	-1.03553	1.07661	0.0246046	0.418278	-0.902157	0.378534
Other pharmacogenomic interactions	71	Pyrimethamine	Dihydrofolate reductase (DHFR)	KRAS_mut	LUAD	4	13	0.0140241	0.0841443	-1.37058	1.07498	0.0350299	0.122134	-0.900751	0.913164
Other pharmacogenomic interactions	253	XMD14-99	ALK, CDK7, LTK, others	loss:cnaESCA1	ESCA	6	35	0.0129793	0.0844356	-0.701338	1.07347	0.0447675	0.261871	-0.442995	0.581913
Other pharmacogenomic interactions	253	XMD14-99	ALK, CDK7, LTK, others	loss:cnaESCA12	ESCA	8	35	0.0158317	0.0844356	-0.688374	1.07347	0.20181	0.358773	-0.372523	0.445181
Other pharmacogenomic interactions	253	XMD14-99	ALK, CDK7, LTK, others	gain:cnaESCA7 (ERBB2)	ESCA	10	35	0.012608	0.0844356	-0.893073	1.07347	0.368618	0.536171	-0.299425	0.270697
Other pharmacogenomic interactions	1373	Dabrafenib	BRAF	BRAF_mut	COREAD	8	45	0.00101994	0.0846549	-1.63276	1.07235	0.000137755	0.0114336	-1.87712	1.94182
Other pharmacogenomic interactions	286	KIN001-236	Angiopoietin-1 receptor	gain:cnaLUSC37	LUSC	3	14	0.0264706	0.0847059	-1.74853	1.07209	0.0407316	0.130341	-1.58131	0.884919
Other pharmacogenomic interactions	286	KIN001-236	Angiopoietin-1 receptor	gain:cnaLUSC6 (FGFR1,WHSC1L1)	LUSC	3	14	0.0264706	0.0847059	-1.74853	1.07209	0.0407316	0.130341	-1.58131	0.884919
Other pharmacogenomic interactions	286	KIN001-236	Angiopoietin-1 receptor	gain:cnaLUSC7 (MYC)	LUSC	3	14	0.0264706	0.0847059	-1.74853	1.07209	0.0407316	0.130341	-1.58131	0.884919
Other pharmacogenomic interactions	288	WHI-P97	JAK3	ATRX_mut	COREAD	3	46	0.000964081	0.0848392	-2.32453	1.0714	0.00048376	0.0425709	-2.49066	1.37089
Other pharmacogenomic interactions	186	Bexarotene	Retinioic X receptor (RXR) agonist	CHD9_mut	COREAD	8	38	0.00344738	0.0850354	-1.87225	1.0704	0.106553	0.528628	-1.21838	0.27685
Other pharmacogenomic interactions	1230	IOX2	EGLN1	gain:cnaLUAD17 (KRAS)	LUAD	5	61	0.00695108	0.0852249	-1.36238	1.06943	0.0673342	0.565608	-0.842052	0.247485
Other pharmacogenomic interactions	1230	IOX2	EGLN1	gain:cnaLUAD30 (CCND1)	LUAD	6	61	0.00622351	0.0852249	-1.26342	1.06943	0.145827	0.810703	-0.582422	0.0911381
Other pharmacogenomic interactions	1230	IOX2	EGLN1	MGA_mut	LUAD	3	61	0.00308602	0.0852249	-1.89629	1.06943	0.194536	0.810703	-0.759321	0.0911381
Other pharmacogenomic interactions	1230	IOX2	EGLN1	RBM10_mut	LUAD	3	61	0.00811665	0.0852249	-1.67551	1.06943	0.562895	0.849128	-0.298614	0.0710271
Other pharmacogenomic interactions	290	KIN001-260	IKKB	loss:cnaSTAD48 (FAT1,IRF2)	STAD	8	21	0.00388226	0.0854098	-1.65244	1.06849	0.0430485	0.473533	-0.94949	0.32465
Other pharmacogenomic interactions	1262	UNC1215	L3MBTL3	gain:cnaLUAD35 (MECOM)	LUAD	4	60	0.00204903	0.0860594	-1.68909	1.0652	0.339103	0.874607	-0.605677	0.0581872
Other pharmacogenomic interactions	230	GSK429286A	ROCK1, ROCK2	loss:cnaOV33 (ZFHX3)	OV	4	32	0.00598798	0.0862418	-1.66222	1.06428	0.157904	0.664438	-0.697198	0.177546
Other pharmacogenomic interactions	230	GSK429286A	ROCK1, ROCK2	loss:cnaOV34	OV	5	32	0.00560536	0.0862418	-1.48397	1.06428	0.0553135	0.664438	-0.87491	0.177546
Other pharmacogenomic interactions	230	GSK429286A	ROCK1, ROCK2	loss:cnaOV36	OV	3	32	0.00186813	0.0862418	-2.09049	1.06428	0.118377	0.664438	-0.901996	0.177546
Other pharmacogenomic interactions	230	GSK429286A	ROCK1, ROCK2	loss:cnaOV87	OV	3	32	0.00684459	0.0862418	-1.88432	1.06428	0.504711	0.85541	-0.330271	0.0678256
Other pharmacogenomic interactions	230	GSK429286A	ROCK1, ROCK2	loss:cnaOV88	OV	3	32	0.00684459	0.0862418	-1.88432	1.06428	0.504711	0.85541	-0.330271	0.0678256
Other pharmacogenomic interactions	326	GSK690693	AKT1, AKT2, AKT3	EP300_mut	DLBC	6	28	0.032398	0.0863947	-1.10353	1.06351	0.0462596	0.133212	-1.03248	0.875455
Other pharmacogenomic interactions	326	GSK690693	AKT1, AKT2, AKT3	PTEN_mut	DLBC	6	28	0.0243366	0.0863947	-1.16505	1.06351	0.0499547	0.133212	-1.01511	0.875455
Other pharmacogenomic interactions	326	GSK690693	AKT1, AKT2, AKT3	TP53_mut	DLBC	16	28	0.0315824	0.0863947	-0.88241	1.06351	0.0444174	0.133212	-0.866189	0.875455
Other pharmacogenomic interactions	1243	Piperlongumine	Induces reactive oxygen species	TP53_mut	PAAD	24	29	0.0384224	0.0864504	-1.132	1.06323	0.0282879	0.0615005	-1.13192	1.21112
Other pharmacogenomic interactions	1014	Refametinib	MEK1, MEK2	loss:cnaLGG1 (BNC2,CDKN2A,JAK2,PSIP1)	LGG	8	14	0.0432991	0.0865981	-1.05307	1.06249	0.0957896	0.191579	-0.793274	0.717652
Other pharmacogenomic interactions	1006	Cytarabine	Antimetabolite	TP53_mut	BLCA	9	13	0.0123769	0.0866385	-1.92025	1.06229	0.0177054	0.123938	-1.76988	0.906795
Other pharmacogenomic interactions	147	NSC-87877	SHP-1 (PTPN6), SHP-2 (PTPN11)	ARID1A_mut	OV	5	19	0.00495215	0.0866626	-0.84475	1.06217	0.387095	0.818353	-0.265753	0.0870595
Other pharmacogenomic interactions	1261	rTRAIL	TRAIL receptor agonist	gain:cnaLGG16 (EGFR)	LGG	5	17	0.0124489	0.0871426	-1.53134	1.05977	0.00206081	0.0144257	-2.00091	1.84086
Other pharmacogenomic interactions	1377	Afatinib	ERBB2, EGFR	ASXL1_mut	LAML	5	26	0.0145346	0.0872075	-1.38544	1.05945	0.11991	0.359729	-0.892072	0.444024
Other pharmacogenomic interactions	1025	SB216763	GSK3A, GSK3B	loss:cnaBLCA18 (CHD9,CNOT1,CYLD,MMP2,NUP93)	BLCA	3	12	0.0125193	0.0876353	-1.81644	1.05732	0.0382084	0.168894	-1.72533	0.772386
Other pharmacogenomic interactions	1199	Tamoxifen	ESR1	RNF43_mut	PAAD	4	29	0.0125149	0.0885626	-1.32955	1.05275	0.0111969	0.100772	-1.44296	0.99666
Other pharmacogenomic interactions	1038	NU7441	DNAPK	EP300_mut	STAD	3	23	0.00385427	0.0886481	-2.37867	1.05233	0.137687	0.980051	-0.962655	0.00875145
Other pharmacogenomic interactions	326	GSK690693	AKT1, AKT2, AKT3	PTEN_mut	KIRC	3	31	0.00422937	0.0888167	-2.22124	1.05151	0.0201208	0.422538	-1.84105	0.374134
Other pharmacogenomic interactions	1219	PFI-1	BRD4	PIK3CA_mut	ESCA	5	35	0.00555231	0.0888369	-1.57295	1.05141	0.0153918	0.246268	-1.38589	0.608592
Other pharmacogenomic interactions	294	MPS-1-IN-1	MPS1	gain:cnaLUAD3 (TERT)	LUAD	12	61	0.00211565	0.0888574	-1.10448	1.05131	0.0114841	0.482332	-0.879885	0.316654
Other pharmacogenomic interactions	230	GSK429286A	ROCK1, ROCK2	SVEP1_mut	LUAD	3	61	0.00212014	0.0890461	-1.71441	1.05039	0.135612	0.705914	-0.590048	0.151248
Other pharmacogenomic interactions	230	GSK429286A	ROCK1, ROCK2	loss:cnaOV35	OV	5	32	0.00851037	0.0893589	-1.40267	1.04886	0.0513977	0.664438	-0.891113	0.177546
Other pharmacogenomic interactions	302	PI-103	PI3Kalpha, DAPK3, CLK4, PIM3, HIPK2	loss:cnaKIRC12	KIRC	12	31	0.0213049	0.0894805	-0.292864	1.04827	0.053297	0.223847	-0.342787	0.650048
Other pharmacogenomic interactions	302	PI-103	PI3Kalpha, DAPK3, CLK4, PIM3, HIPK2	loss:cnaKIRC13	KIRC	12	31	0.0213049	0.0894805	-0.292864	1.04827	0.053297	0.223847	-0.342787	0.650048
Other pharmacogenomic interactions	302	PI-103	PI3Kalpha, DAPK3, CLK4, PIM3, HIPK2	loss:cnaKIRC14	KIRC	12	31	0.0213049	0.0894805	-0.292864	1.04827	0.053297	0.223847	-0.342787	0.650048
Other pharmacogenomic interactions	302	PI-103	PI3Kalpha, DAPK3, CLK4, PIM3, HIPK2	loss:cnaKIRC15	KIRC	12	31	0.0213049	0.0894805	-0.292864	1.04827	0.053297	0.223847	-0.342787	0.650048
Other pharmacogenomic interactions	302	PI-103	PI3Kalpha, DAPK3, CLK4, PIM3, HIPK2	loss:cnaKIRC16	KIRC	6	31	0.0138419	0.0894805	-0.808475	1.04827	0.0476279	0.223847	-0.73692	0.650048
Other pharmacogenomic interactions	38	Saracatinib	ABL, SRC	gain:cnaBRCA39 (FOXA1,NKX2-1,PSMA6)	BRCA	3	14	0.0100178	0.0901601	-1.80646	1.04499	0.0440689	0.275543	-1.18601	0.559811
Other pharmacogenomic interactions	38	Saracatinib	ABL, SRC	gain:cnaBRCA31	BRCA	4	14	0.00706191	0.0901601	-1.8203	1.04499	0.0662345	0.298055	-1.0602	0.525703
Other pharmacogenomic interactions	182	Obatoclax Mesylate	BCL2, BCL-XL, BCL-W, MCL1	ASH1L_mut	BRCA	3	48	0.00177068	0.0903046	-1.8567	1.04429	0.000525559	0.0268035	-2.10487	1.57181
Other pharmacogenomic interactions	211	TL-2-105	not defined	loss:cnaSTAD48 (FAT1,IRF2)	STAD	8	21	0.0082332	0.0905653	-1.1948	1.04304	0.0264604	0.291065	-0.919351	0.53601
Other pharmacogenomic interactions	176	IPA-3	PAK1	loss:cnaKIRC12	KIRC	6	23	0.0353139	0.0908071	-0.809252	1.04188	0.0649147	0.166924	-0.655247	0.777482
Other pharmacogenomic interactions	176	IPA-3	PAK1	loss:cnaKIRC13	KIRC	6	23	0.0353139	0.0908071	-0.809252	1.04188	0.0649147	0.166924	-0.655247	0.777482
Other pharmacogenomic interactions	176	IPA-3	PAK1	loss:cnaKIRC14	KIRC	6	23	0.0353139	0.0908071	-0.809252	1.04188	0.0649147	0.166924	-0.655247	0.777482
Other pharmacogenomic interactions	176	IPA-3	PAK1	loss:cnaKIRC15	KIRC	6	23	0.0353139	0.0908071	-0.809252	1.04188	0.0649147	0.166924	-0.655247	0.777482
Other pharmacogenomic interactions	176	IPA-3	PAK1	loss:cnaKIRC22	KIRC	6	23	0.00753357	0.0908071	-1.33173	1.04188	0.0151601	0.166924	-1.1667	0.777482
Other pharmacogenomic interactions	176	IPA-3	PAK1	loss:cnaKIRC3	KIRC	3	23	0.0173769	0.0908071	-1.1454	1.04188	0.0411889	0.166924	-0.916099	0.777482
Other pharmacogenomic interactions	176	IPA-3	PAK1	loss:cnaKIRC4	KIRC	3	23	0.0173769	0.0908071	-1.1454	1.04188	0.0411889	0.166924	-0.916099	0.777482
Other pharmacogenomic interactions	166	FTI-277	Farnesyl-transferase (FNTA)	gain:cnaPAAD3	PAAD	4	30	0.0202788	0.0912546	-0.958104	1.03975	0.160947	0.36213	-0.326677	0.441136
Other pharmacogenomic interactions	1003	Camptothecin	TOP1	TP53_mut	PAAD	22	25	0.0182901	0.0914506	-1.60527	1.03881	0.026709	0.133545	-1.4913	0.874373
Other pharmacogenomic interactions	202	GSK1904529A	IGF1R, IR	NRAS_mut	BLCA	3	19	0.00763079	0.0915695	-2.01618	1.03825	0.135492	0.541968	-0.984745	0.266027
Other pharmacogenomic interactions	1047	Nutlin-3a (-)	MDM2	RNF43_mut	PAAD	3	23	0.0152651	0.0915907	-1.78126	1.03815	0.138298	0.414895	-1.09446	0.382062
Other pharmacogenomic interactions	1170	CCT-018159	HSP90	TP53_mut	SKCM	16	50	0.00381712	0.0916108	-0.906028	1.03805	0.00781013	0.187443	-0.861269	0.72713
Other pharmacogenomic interactions	6	PHA-665752	MET	loss:cnaSKCM3	SKCM	3	18	0.0101884	0.0916958	-2.47199	1.03765	0.140956	0.6343	-1.21865	0.197705
Other pharmacogenomic interactions	1017	Olaparib	PARP1, PARP2	CEP290_mut	COREAD	3	43	0.00115096	0.0920768	-2.25581	1.03585	0.11317	0.96824	-1.2612	0.014017
Other pharmacogenomic interactions	147	NSC-87877	SHP-1 (PTPN6), SHP-2 (PTPN11)	gain:cnaLUAD32	LUAD	3	59	0.00438652	0.0921168	-1.76928	1.03566	0.205455	0.958789	0.710703	-0.0182771
Other pharmacogenomic interactions	274	Belinostat	HDAC1	gain:cnaESCA2 (KRAS)	ESCA	3	35	0.0115507	0.0924055	-0.719513	1.0343	0.0555676	0.444541	-0.416951	0.352088
Other pharmacogenomic interactions	274	Belinostat	HDAC1	gain:cnaESCA3 (KRAS)	ESCA	3	35	0.0115507	0.0924055	-0.719513	1.0343	0.0555676	0.444541	-0.416951	0.352088
Other pharmacogenomic interactions	1377	Afatinib	ERBB2, EGFR	gain:cnaBRCA27 (CLTC,PPM1D)	BRCA	10	47	0.00372272	0.093068	-1.15598	1.0312	0.01467	0.36675	-0.927516	0.43563
Other pharmacogenomic interactions	1495	Olaparib	PARP1, PARP2	NR4A2_mut	COREAD	5	46	0.00109641	0.0931949	-1.88699	1.03061	0.213836	0.642147	-0.903287	0.192365
Other pharmacogenomic interactions	1023	GW441756	NTRK1	ASXL1_mut	LAML	5	24	0.015542	0.0932518	-1.33855	1.03034	0.109417	0.345639	-0.74023	0.461378
Other pharmacogenomic interactions	1029	Motesanib	VEGFR, RET, KIT, PDGFR	gain:cnaOV72 (ASXL1)	OV	5	33	0.00142032	0.0937408	-1.61767	1.02807	0.496239	0.779804	-0.31554	0.108014
Other pharmacogenomic interactions	1011	Navitoclax	BCL2, BCL-XL, BCL-W	TP53_mut	DLBC	19	32	0.0351678	0.0937807	-0.321096	1.02789	0.0325055	0.0866813	-0.2955	1.06207
Other pharmacogenomic interactions	1032	Afatinib	ERBB2, EGFR	gain:cnaBRCA31	BRCA	14	45	0.0040131	0.0943079	-1.00398	1.02545	0.0221261	0.519963	-0.72981	0.284027
Other pharmacogenomic interactions	262	VX-11e	ERK2	loss:cnaSTAD13	STAD	11	21	0.00428708	0.0943158	-1.46657	1.02542	0.0210241	0.195455	-1.32589	0.708954
Other pharmacogenomic interactions	309	Y-39983	ROCK	loss:cnaKIRC12	KIRC	12	31	0.0225111	0.0945467	-0.529386	1.02435	0.037826	0.158869	-0.530325	0.79896
Other pharmacogenomic interactions	309	Y-39983	ROCK	loss:cnaKIRC13	KIRC	12	31	0.0225111	0.0945467	-0.529386	1.02435	0.037826	0.158869	-0.530325	0.79896
Other pharmacogenomic interactions	309	Y-39983	ROCK	loss:cnaKIRC14	KIRC	12	31	0.0225111	0.0945467	-0.529386	1.02435	0.037826	0.158869	-0.530325	0.79896
Other pharmacogenomic interactions	309	Y-39983	ROCK	loss:cnaKIRC15	KIRC	12	31	0.0225111	0.0945467	-0.529386	1.02435	0.037826	0.158869	-0.530325	0.79896
Other pharmacogenomic interactions	309	Y-39983	ROCK	loss:cnaKIRC22	KIRC	10	31	0.0180269	0.0945467	-0.815935	1.02435	0.0239305	0.158869	-0.820889	0.79896
Other pharmacogenomic interactions	1012	Vorinostat	HDAC inhibitor Class I, IIa, IIb, IV	gain:cnaLGG16 (EGFR)	LGG	5	15	0.0315592	0.0946777	-1.41647	1.02375	0.00416071	0.0249643	-2.00574	1.60268
Other pharmacogenomic interactions	1010	Gefitinib	EGFR	loss:cnaHNSC20	HNSC	16	34	0.0180444	0.0947332	-0.728331	1.0235	0.0878294	0.263488	-0.494371	0.579239
Other pharmacogenomic interactions	299	OSI-027	MTORC1, MTORC2	loss:cnaKIRC12	KIRC	12	31	0.018138	0.0952247	-0.471812	1.02125	0.0275584	0.115745	-0.545197	0.936496
Other pharmacogenomic interactions	299	OSI-027	MTORC1, MTORC2	loss:cnaKIRC13	KIRC	12	31	0.018138	0.0952247	-0.471812	1.02125	0.0275584	0.115745	-0.545197	0.936496
Other pharmacogenomic interactions	299	OSI-027	MTORC1, MTORC2	loss:cnaKIRC14	KIRC	12	31	0.018138	0.0952247	-0.471812	1.02125	0.0275584	0.115745	-0.545197	0.936496
Other pharmacogenomic interactions	299	OSI-027	MTORC1, MTORC2	loss:cnaKIRC15	KIRC	12	31	0.018138	0.0952247	-0.471812	1.02125	0.0275584	0.115745	-0.545197	0.936496
Other pharmacogenomic interactions	253	XMD14-99	ALK, CDK7, LTK, others	CDKN2A_mut	PAAD	4	29	0.0105977	0.0953795	-1.48211	1.02054	0.14586	0.871161	-0.821808	0.0599017
Other pharmacogenomic interactions	269	NSC-207895	MDM4	loss:cnaSTAD13	STAD	11	21	0.00438138	0.0963903	-1.52711	1.01597	0.00326586	0.0718488	-1.50295	1.14358
Other pharmacogenomic interactions	180	Thapsigargin	SERCA	LARP4B_mut	UCEC	3	9	0.00692422	0.0969391	-1.62437	1.0135	0.0124861	0.127185	-2.61448	0.895563
Other pharmacogenomic interactions	256	JW-7-24-1	LCK	TP53_mut	LIHC	12	17	0.0647893	0.097184	-1.20309	1.01241	0.471892	0.623463	-0.508087	0.20519
Other pharmacogenomic interactions	286	KIN001-236	Angiopoietin-1 receptor	loss:cnaOV58	OV	5	32	0.00309317	0.0974349	-1.62698	1.01129	0.453468	0.970994	-0.34852	0.0127834
Other pharmacogenomic interactions	203	BMS-345541	IKK1, IKK2	EP300_mut	DLBC	6	29	0.012241	0.0979279	-1.13759	1.00909	0.0815978	0.377671	-0.798867	0.422886
Other pharmacogenomic interactions	282	Pelitinib	EGFR	CDKN2A_mut	PAAD	4	29	0.0108861	0.0979748	-1.50606	1.00889	0.0706814	0.636132	-1.00568	0.196453
Other pharmacogenomic interactions	1262	UNC1215	L3MBTL3	MLL2_mut	LUSC	3	15	0.00544834	0.09807	-2.47721	1.00846	0.323008	0.891349	-0.167067	0.049952
Other pharmacogenomic interactions	185	Linsitinib	IGF1R	NRAS_mut	BLCA	3	19	0.00820122	0.0984147	-1.88988	1.00694	0.0470144	0.533813	-1.40279	0.27261
Other pharmacogenomic interactions	1047	Nutlin-3a (-)	MDM2	BRAF_mut	THCA	6	14	0.0328461	0.0985383	-1.38731	1.0064	0.110746	0.166119	-0.902936	0.779581
Other pharmacogenomic interactions	310	YM201636	PYKFYVE	loss:cnaKIRC7 (CDKN2A)	KIRC	26	31	0.0201621	0.0985523	-1.15053	1.00633	0.0180128	0.378268	-1.17377	0.4222
Other pharmacogenomic interactions	310	YM201636	PYKFYVE	loss:cnaKIRC12	KIRC	12	31	0.0234648	0.0985523	-0.530753	1.00633	0.214747	0.644242	-0.22094	0.190951
Other pharmacogenomic interactions	310	YM201636	PYKFYVE	loss:cnaKIRC13	KIRC	12	31	0.0234648	0.0985523	-0.530753	1.00633	0.214747	0.644242	-0.22094	0.190951
Other pharmacogenomic interactions	310	YM201636	PYKFYVE	loss:cnaKIRC14	KIRC	12	31	0.0234648	0.0985523	-0.530753	1.00633	0.214747	0.644242	-0.22094	0.190951
Other pharmacogenomic interactions	310	YM201636	PYKFYVE	loss:cnaKIRC15	KIRC	12	31	0.0234648	0.0985523	-0.530753	1.00633	0.214747	0.644242	-0.22094	0.190951
Other pharmacogenomic interactions	1013	Nilotinib	ABL	loss:cnaBRCA20	BRCA	3	40	0.00419452	0.0985712	-1.70977	1.00625	0.628968	0.895804	-0.0472116	0.0477872
Other pharmacogenomic interactions	253	XMD14-99	ALK, CDK7, LTK, others	gain:cnaESCA2 (KRAS)	ESCA	3	35	0.0308767	0.0988054	-1.56174	1.00522	0.100877	0.261871	-1.004	0.581913
Other pharmacogenomic interactions	253	XMD14-99	ALK, CDK7, LTK, others	gain:cnaESCA3 (KRAS)	ESCA	3	35	0.0308767	0.0988054	-1.56174	1.00522	0.100877	0.261871	-1.004	0.581913
Other pharmacogenomic interactions	104	Bortezomib	Proteasome	TP53_mut	LGG	8	11	0.0164767	0.0988603	-1.71569	1.00498	0.00987988	0.0592793	-1.80372	1.2271
Other pharmacogenomic interactions	1262	UNC1215	L3MBTL3	loss:cnaLUSC3	LUSC	7	15	0.0110301	0.0992712	-1.25597	1.00318	0.487509	0.891349	-0.510646	0.049952
Other pharmacogenomic interactions	238	Idelalisib	PI3Kdelta	loss:cnaKIRC12	KIRC	12	31	0.0190499	0.100012	-0.859594	0.999947	0.0660123	0.277252	-0.488397	0.557126
Other pharmacogenomic interactions	238	Idelalisib	PI3Kdelta	loss:cnaKIRC13	KIRC	12	31	0.0190499	0.100012	-0.859594	0.999947	0.0660123	0.277252	-0.488397	0.557126
Other pharmacogenomic interactions	238	Idelalisib	PI3Kdelta	loss:cnaKIRC14	KIRC	12	31	0.0190499	0.100012	-0.859594	0.999947	0.0660123	0.277252	-0.488397	0.557126
Other pharmacogenomic interactions	238	Idelalisib	PI3Kdelta	loss:cnaKIRC15	KIRC	12	31	0.0190499	0.100012	-0.859594	0.999947	0.0660123	0.277252	-0.488397	0.557126
Other pharmacogenomic interactions	298	OSI-930	KIT	gain:cnaESCA2 (KRAS)	ESCA	3	35	0.0125328	0.100263	-1.33346	0.99886	0.361053	0.518822	-0.807718	0.284982
Other pharmacogenomic interactions	298	OSI-930	KIT	gain:cnaESCA3 (KRAS)	ESCA	3	35	0.0125328	0.100263	-1.33346	0.99886	0.361053	0.518822	-0.807718	0.284982
Other pharmacogenomic interactions	156	AZD6482	PI3Kbeta	loss:cnaSTAD30	STAD	9	21	0.0136738	0.100274	-1.15557	0.99881	0.0048837	0.0537207	-1.21465	1.26986
Other pharmacogenomic interactions	147	NSC-87877	SHP-1 (PTPN6), SHP-2 (PTPN11)	CREBBP_mut	COREAD	3	39	0.00401811	0.100453	-2.00947	0.998038	0.0360012	0.932068	-1.91489	0.0305525
Other pharmacogenomic interactions	150	Bicalutamide	AR	BPTF_mut	COREAD	4	38	0.00544998	0.100825	-1.40008	0.996433	0.585075	0.869224	-0.30527	0.0608683
Other pharmacogenomic interactions	288	WHI-P97	JAK3	loss:cnaKIRC12	KIRC	12	31	0.0240429	0.10098	-0.505414	0.995764	0.123652	0.43278	-0.188252	0.363733
Other pharmacogenomic interactions	288	WHI-P97	JAK3	loss:cnaKIRC13	KIRC	12	31	0.0240429	0.10098	-0.505414	0.995764	0.123652	0.43278	-0.188252	0.363733
Other pharmacogenomic interactions	288	WHI-P97	JAK3	loss:cnaKIRC14	KIRC	12	31	0.0240429	0.10098	-0.505414	0.995764	0.123652	0.43278	-0.188252	0.363733
Other pharmacogenomic interactions	288	WHI-P97	JAK3	loss:cnaKIRC15	KIRC	12	31	0.0240429	0.10098	-0.505414	0.995764	0.123652	0.43278	-0.188252	0.363733
Other pharmacogenomic interactions	230	GSK429286A	ROCK1, ROCK2	NF1_mut	BRCA	5	49	0.0119436	0.101521	-1.17031	0.993446	0.0530155	0.386256	-0.770397	0.413125
Other pharmacogenomic interactions	1018	Veliparib	PARP1, PARP2	ARID2_mut	SKCM	3	47	0.00483715	0.10158	-1.76998	0.993191	0.197638	0.709535	-0.543664	0.149026
Other pharmacogenomic interactions	1194	SB-505124	ALK4, ALK5	loss:cnaLGG14 (CUL2)	LGG	4	17	0.0145544	0.101881	-1.62368	0.991908	0.300225	0.744893	-0.647212	0.127906
Other pharmacogenomic interactions	11	Paclitaxel	Microtubule stabiliser	TP53_mut	LGG	8	11	0.0341464	0.102439	-1.98235	0.989534	0.0486198	0.145859	-1.82725	0.836066
Other pharmacogenomic interactions	312	Tivozanib	VEGFR1, VEGFR2, VEGFR3	loss:cnaLIHC10 (RB1)	LIHC	3	17	0.0343585	0.103075	-1.50296	0.986845	0.690864	0.690864	0.269492	-0.160607
Other pharmacogenomic interactions	341	Selisistat	SIRT1	gain:cnaGBM25 (CDK4)	GBM	4	35	0.00312537	0.103137	-1.72343	0.986584	0.0548064	0.747968	-1.0329	0.126117
Other pharmacogenomic interactions	1032	Afatinib	ERBB2, EGFR	SMAD4_mut	PAAD	7	25	0.0206397	0.103199	-1.15669	0.986326	0.192755	0.440322	-0.647758	0.35623
Other pharmacogenomic interactions	231	FMK	RSK	loss:cnaLUAD2 (PAX5)	LUAD	5	58	0.00492478	0.10342	-2.07225	0.985394	0.0687626	0.528613	-1.27108	0.276862
Other pharmacogenomic interactions	231	FMK	RSK	RB1_mut	LUAD	3	58	0.00331318	0.10342	-2.34964	0.985394	0.045646	0.528613	-1.78672	0.276862
Other pharmacogenomic interactions	32	Tozasertib	AURKA, AURKB, AURKC, others	BRAF_mut	SKCM	12	18	0.0230085	0.103538	-0.970505	0.984899	0.0609037	0.260523	-0.911548	0.584154
Other pharmacogenomic interactions	1028	VX-702	p38	gain:cnaSTAD45 (MET)	STAD	3	22	0.0148278	0.103794	-1.63246	0.983826	0.631715	0.788233	-0.535236	0.103345
Other pharmacogenomic interactions	1028	VX-702	p38	loss:cnaSTAD12	STAD	4	22	0.0100914	0.103794	-1.1274	0.983826	0.491579	0.788233	-0.317902	0.103345
Other pharmacogenomic interactions	1028	VX-702	p38	loss:cnaSTAD42	STAD	4	22	0.0143757	0.103794	-1.64647	0.983826	0.638093	0.788233	-0.157358	0.103345
Other pharmacogenomic interactions	221	TAK-715	p38alpha, p38beta	gain:cnaBLCA23 (MYC)	BLCA	4	19	0.00866066	0.103928	-1.64037	0.983268	0.0341841	0.410209	-1.29182	0.386994
Other pharmacogenomic interactions	1020	Lenalidomide	CRBN	ARID1A_mut	UCEC	3	8	0.0346552	0.103962	-1.42036	0.983126	0.273775	0.612675	-1.33491	0.21277
Other pharmacogenomic interactions	1020	Lenalidomide	CRBN	EP300_mut	UCEC	4	8	0.0346552	0.103962	-2.38466	0.983126	0.273775	0.612675	-1.03472	0.21277
Other pharmacogenomic interactions	1020	Lenalidomide	CRBN	PIK3CA_mut	UCEC	4	8	0.0378043	0.103962	-0.60091	0.983126	0.246062	0.612675	-0.734202	0.21277
Other pharmacogenomic interactions	106	XMD8-85	ERK5, BET	RB1_mut	LGG	5	11	0.0347058	0.104118	-1.6533	0.982476	0.0635988	0.190797	-1.38689	0.719429
Other pharmacogenomic interactions	302	PI-103	PI3Kalpha, DAPK3, CLK4, PIM3, HIPK2	loss:cnaKIRC23	KIRC	4	31	0.0297521	0.104132	-0.622946	0.982414	0.0730551	0.248847	-0.613225	0.604068
Other pharmacogenomic interactions	1498	Selumetinib	MEK1, MEK2	gain:cnaBLCA15 (ASXL1)	BLCA	6	19	0.00869273	0.104313	-1.53148	0.981663	0.00472995	0.0567594	-1.67891	1.24596
Other pharmacogenomic interactions	1243	Piperlongumine	Induces reactive oxygen species	loss:cnaGBM68 (CDKN2C,FAF1)	GBM	6	35	0.0126561	0.104413	-1.22265	0.981246	0.153619	0.535174	-0.790252	0.271505
Other pharmacogenomic interactions	207	AS601245	JNK1, JNK2, JNK2	gain:cnaLGG16 (EGFR)	LGG	5	16	0.0450181	0.105042	-1.18787	0.978636	0.0454315	0.106007	-1.18025	0.974666
Other pharmacogenomic interactions	156	AZD6482	PI3Kbeta	loss:cnaBRCA17	BRCA	10	47	0.00521822	0.105286	-0.896112	0.977628	0.00507457	0.12179	-0.849565	0.914389
Other pharmacogenomic interactions	156	AZD6482	PI3Kbeta	PTEN_mut	BRCA	8	47	0.0065804	0.105286	-1.22804	0.977628	0.00260759	0.12179	-1.34572	0.914389
Other pharmacogenomic interactions	156	AZD6482	PI3Kbeta	TP53_mut	BRCA	37	47	0.00617497	0.105286	-1.10779	0.977628	0.0303159	0.291032	-0.862169	0.536059
Other pharmacogenomic interactions	229	Enzastaurin	PKCB	loss:cnaKIRC24 (FAT1,IRF2)	KIRC	8	31	0.0250746	0.105313	-0.774039	0.977517	0.0456848	0.191876	-0.613328	0.716979
Other pharmacogenomic interactions	1230	IOX2	EGLN1	MKL1_mut	UCEC	3	9	0.0150837	0.105586	-0.636975	0.976394	0.837532	0.901958	0.358784	-0.0448139
Other pharmacogenomic interactions	1022	AZD7762	CHEK1, CHEK2	gain:cnaLGG16 (EGFR)	LGG	5	15	0.0352005	0.105602	-1.39375	0.976329	0.0125516	0.0753098	-1.70817	1.12315
Other pharmacogenomic interactions	1529	Pevonedistat	NAE	loss:cnaLUSC17 (FAT1,IRF2)	LUSC	4	11	0.0445214	0.106851	-1.63856	0.97122	0.020435	0.0490441	-1.96048	1.30941
Other pharmacogenomic interactions	190	Bleomycin	dsDNA break induction	gain:cnaLGG16 (EGFR)	LGG	5	15	0.0412593	0.106855	-1.2876	0.971206	0.0372108	0.0868252	-1.31735	1.06135
Other pharmacogenomic interactions	281	Alectinib	ALK	gain:cnaPAAD3	PAAD	4	29	0.023865	0.107392	-1.394	0.969026	0.314541	0.582204	-0.308542	0.234925
Other pharmacogenomic interactions	190	Bleomycin	dsDNA break induction	loss:cnaDLBC4 (CDKN2A)	DLBC	8	29	0.0134271	0.107417	-1.16774	0.968926	0.00852855	0.0682284	-1.26703	1.16603
Other pharmacogenomic interactions	1052	RO-3306	CDK1	PIK3CA_mut	STAD	3	23	0.00467938	0.107626	-1.84836	0.968083	0.00646941	0.148796	-1.88106	0.827407
Other pharmacogenomic interactions	1005	Cisplatin	DNA crosslinker	PIK3R1_mut	OV	4	31	0.00484838	0.108932	-1.93207	0.962844	0.000393059	0.0247627	-2.46009	1.6062
Other pharmacogenomic interactions	1005	Cisplatin	DNA crosslinker	ARID1A_mut	OV	9	31	0.00518725	0.108932	-1.38617	0.962844	0.0052477	0.165303	-1.44547	0.78172
Other pharmacogenomic interactions	208	Ispinesib Mesylate	KSP	loss:cnaKIRC23	KIRC	4	31	0.0260121	0.109251	-0.972167	0.961575	0.122319	0.366958	-0.494004	0.435384
Other pharmacogenomic interactions	54	CGP-082996	CDK4	NF1_mut	GBM	4	12	0.0524589	0.109468	-1.21947	0.960714	0.108621	0.144828	-0.828528	0.839146
Other pharmacogenomic interactions	329	QL-XI-92	DDR1	loss:cnaKIRC16	KIRC	6	31	0.0260946	0.109597	-0.95451	0.960199	0.0998326	0.349414	-0.668254	0.45666
Other pharmacogenomic interactions	178	BAY-61-3606	SYK	loss:cnaCOREAD19	COREAD	16	38	0.00296313	0.109636	-1.3093	0.960047	0.00467012	0.342319	-1.2545	0.465568
Other pharmacogenomic interactions	178	BAY-61-3606	SYK	loss:cnaCOREAD65	COREAD	22	38	0.00251099	0.109636	-1.41816	0.960047	0.0269799	0.399302	-1.06802	0.398699
Other pharmacogenomic interactions	163	JQ1	BRD2, BRD3, BRD4, BRDT	loss:cnaSTAD30	STAD	9	21	0.00498708	0.109716	-1.40938	0.959731	0.00510658	0.112345	-1.37866	0.949447
Other pharmacogenomic interactions	1375	Temozolomide	DNA alkylating agent	gain:cnaGBM25 (CDK4)	GBM	4	34	0.003333	0.109989	-1.7409	0.95865	0.0729932	0.243516	-0.973311	0.613473
Other pharmacogenomic interactions	155	Ponatinib	ABL, PDGFRA, VEGFR2, FGFR1, SRC, TIE2, FLT3	ASH1L_mut	BRCA	3	47	0.00688088	0.110094	-1.75167	0.958236	0.0242737	0.291284	-1.67754	0.535683
Other pharmacogenomic interactions	211	TL-2-105	not defined	loss:cnaOV35	OV	5	32	0.0017479	0.110118	-1.71459	0.958142	0.00124723	0.0785755	-1.53317	1.10471
Other pharmacogenomic interactions	238	Idelalisib	PI3Kdelta	TP53_mut	BLCA	15	19	0.00917866	0.110144	-1.71501	0.95804	0.0210434	0.12626	-1.48076	0.898733
Other pharmacogenomic interactions	1011	Navitoclax	BCL2, BCL-XL, BCL-W	loss:cnaBRCA32 (PABPC3,SACS,ZMYM2)	BRCA	8	43	0.00719872	0.110209	-0.934887	0.957785	0.00272295	0.0426595	-1.1115	1.36998
Other pharmacogenomic interactions	1011	Navitoclax	BCL2, BCL-XL, BCL-W	loss:cnaBRCA20	BRCA	3	43	0.0101272	0.110209	-1.47794	0.957785	0.00574174	0.0674654	-1.57806	1.17092
Other pharmacogenomic interactions	1011	Navitoclax	BCL2, BCL-XL, BCL-W	loss:cnaBRCA28 (GPS2)	BRCA	3	43	0.0117243	0.110209	-1.44569	0.957785	0.0291538	0.154667	-1.21339	0.810601
Other pharmacogenomic interactions	261	TL-1-85	TAK	BRAF_mut	THCA	7	16	0.0737297	0.110595	-1.22762	0.956266	0.0522735	0.0784102	-1.32141	1.10563
Other pharmacogenomic interactions	275	I-BET-762	BRD2, BRD3, BRD4	loss:cnaLUAD14	LUAD	7	61	0.00264351	0.111027	-1.39749	0.95457	0.0442055	0.65571	-0.991673	0.183288
Other pharmacogenomic interactions	1028	VX-702	p38	loss:cnaSTAD7	STAD	5	22	0.0211627	0.111104	-0.941736	0.954271	0.0908864	0.6399	-0.848003	0.193888
Other pharmacogenomic interactions	119	Lapatinib	ERBB2, EGFR	TP53_mut	SKCM	3	16	0.0417963	0.111457	-0.222029	0.952893	0.0762198	0.203253	-0.649288	0.691964
Other pharmacogenomic interactions	1033	Vismodegib	SMO	TP53_mut	THCA	8	13	0.0371666	0.1115	-1.09025	0.952726	0.0503215	0.108319	-0.783995	0.965294
Other pharmacogenomic interactions	261	TL-1-85	TAK	loss:cnaKIRC12	KIRC	12	31	0.0213451	0.112062	-0.524469	0.950542	0.0476202	0.250006	-0.317907	0.602049
Other pharmacogenomic interactions	261	TL-1-85	TAK	loss:cnaKIRC13	KIRC	12	31	0.0213451	0.112062	-0.524469	0.950542	0.0476202	0.250006	-0.317907	0.602049
Other pharmacogenomic interactions	261	TL-1-85	TAK	loss:cnaKIRC14	KIRC	12	31	0.0213451	0.112062	-0.524469	0.950542	0.0476202	0.250006	-0.317907	0.602049
Other pharmacogenomic interactions	261	TL-1-85	TAK	loss:cnaKIRC15	KIRC	12	31	0.0213451	0.112062	-0.524469	0.950542	0.0476202	0.250006	-0.317907	0.602049
Other pharmacogenomic interactions	257	NPK76-II-72-1	PLK3	MLL2_mut	DLBC	9	29	0.0140081	0.112065	-0.948203	0.95053	0.018108	0.144864	-0.924097	0.83904
Other pharmacogenomic interactions	45	Z-LLNle-CHO	gamma-secretase	loss:cnaCOREAD19	COREAD	4	15	0.00468659	0.112478	-1.12159	0.948932	0.00377486	0.0905966	-1.20621	1.04289
Other pharmacogenomic interactions	1015	CI-1040	MEK1, MEK2	loss:cnaLUSC4	LUSC	6	13	0.00939971	0.112797	-1.41511	0.947704	0.00715514	0.0429308	-1.74241	1.36723
Other pharmacogenomic interactions	1502	Bicalutamide	AR	SMARCA4_mut	OV	3	32	0.00202014	0.113128	-2.07661	0.946431	0.0183706	0.981605	-1.39103	0.00806307
Other pharmacogenomic interactions	1262	UNC1215	L3MBTL3	BCOR_mut	COREAD	4	47	0.00132189	0.113682	-1.77181	0.944306	0.531157	0.926181	-0.396353	0.033304
Other pharmacogenomic interactions	154	CHIR-99021	GSK3A, GSK3B	ARID2_mut	STAD	3	21	0.0051779	0.113914	-2.54072	0.943424	0.0548768	0.323566	-1.10854	0.490037
Other pharmacogenomic interactions	1527	Pictilisib	PI3K (class 1)	ASXL1_mut	LAML	5	26	0.0435006	0.114068	-1.18361	0.942837	0.0979594	0.28369	-1.01555	0.547156
Other pharmacogenomic interactions	265	Tubastatin A	HDAC1, HDAC6, HDAC8	CDH1_mut	BRCA	4	49	0.00224532	0.114511	-1.52903	0.941152	0.0137001	0.698706	-1.32321	0.155706
Other pharmacogenomic interactions	228	AKT inhibitor VIII	AKT1, AKT2, AKT3	loss:cnaGBM47	GBM	6	35	0.0453636	0.114713	-0.672284	0.940388	0.103569	0.310708	-0.603925	0.507648
Other pharmacogenomic interactions	228	AKT inhibitor VIII	AKT1, AKT2, AKT3	loss:cnaGBM134	GBM	3	35	0.0422019	0.114713	-1.10836	0.940388	0.128893	0.327189	-0.843678	0.485201
Other pharmacogenomic interactions	228	AKT inhibitor VIII	AKT1, AKT2, AKT3	loss:cnaGBM135	GBM	3	35	0.0422019	0.114713	-1.10836	0.940388	0.128893	0.327189	-0.843678	0.485201
Other pharmacogenomic interactions	228	AKT inhibitor VIII	AKT1, AKT2, AKT3	loss:cnaGBM132	GBM	3	35	0.0486661	0.114713	-1.0718	0.940388	0.243571	0.474652	-0.630639	0.323624
Other pharmacogenomic interactions	238	Idelalisib	PI3Kdelta	gain:cnaHNSC33	HNSC	3	40	0.00441704	0.114843	-1.85759	0.939895	0.00945121	0.245731	-1.67516	0.609539
Other pharmacogenomic interactions	1377	Afatinib	ERBB2, EGFR	gain:cnaSKCM12 (KRAS)	SKCM	7	54	0.00478854	0.114925	-1.14521	0.939586	0.00839905	0.201577	-1.21304	0.695559
Other pharmacogenomic interactions	56	WH-4-023	SRC, LCK	loss:cnaSKCM4 (BNC2,CDKN2A,JAK2,PSIP1)	SKCM	12	18	0.0127827	0.115044	-1.31759	0.939134	0.0555254	0.460989	-1.10853	0.336309
Other pharmacogenomic interactions	172	Embelin	XIAP	LARP4B_mut	UCEC	3	9	0.00823748	0.115325	-4.94745	0.938078	0.0525108	0.693421	-3.60991	0.159003
Other pharmacogenomic interactions	245	UNC0638	G9a and GLP methyltransferases	loss:cnaKIRC7 (CDKN2A)	KIRC	25	30	0.00607091	0.115347	-1.28644	0.937993	0.00979512	0.186107	-1.04568	0.730237
Other pharmacogenomic interactions	203	BMS-345541	IKK1, IKK2	PTEN_mut	DLBC	6	29	0.0289639	0.115856	-0.97833	0.936082	0.519736	0.620541	-0.281626	0.20723
Other pharmacogenomic interactions	211	TL-2-105	not defined	loss:cnaGBM93	GBM	6	35	0.0667482	0.115931	-0.751237	0.9358	0.107078	0.196311	-0.6197	0.707056
Other pharmacogenomic interactions	211	TL-2-105	not defined	loss:cnaGBM94	GBM	6	35	0.0667482	0.115931	-0.751237	0.9358	0.107078	0.196311	-0.6197	0.707056
Other pharmacogenomic interactions	211	TL-2-105	not defined	loss:cnaGBM95	GBM	6	35	0.0667482	0.115931	-0.751237	0.9358	0.107078	0.196311	-0.6197	0.707056
Other pharmacogenomic interactions	263	FR-180204	ERK1, ERK2	CREBBP_mut	DLBC	6	29	0.0145124	0.116099	-1.23772	0.93517	0.131444	0.851682	-0.810222	0.0697227
Other pharmacogenomic interactions	158	PF-562271	FAK, FAK2	PTEN_mut	UCEC	6	9	0.0291656	0.116179	-2.01124	0.934872	0.156508	0.468743	-0.993177	0.329066
Other pharmacogenomic interactions	306	Fedratinib	JAK2	STK11_mut	LUAD	11	61	0.0166048	0.116234	-0.945316	0.934668	0.0101385	0.0869633	-1.06337	1.06066
Other pharmacogenomic interactions	1236	UNC0638	G9a and GLP methyltransferases	BRAF_mut	THCA	7	16	0.11653	0.11653	-1.09458	0.933562	0.17972	0.269579	-0.911888	0.569313
Other pharmacogenomic interactions	17	Cyclopamine	SMO	loss:cnaSTAD13	STAD	3	7	0.0582844	0.116569	-0.992654	0.933418	0.785754	0.785754	0.0854764	-0.104714
Other pharmacogenomic interactions	221	TAK-715	p38alpha, p38beta	MLL3_mut	BRCA	3	49	0.00458449	0.116905	-1.24431	0.932168	0.0303335	0.386752	-1.04849	0.412567
Other pharmacogenomic interactions	341	Selisistat	SIRT1	TP53_mut	SKCM	17	52	0.0120452	0.116952	-0.716422	0.931994	0.00800427	0.15993	-0.694581	0.79607
Other pharmacogenomic interactions	341	Selisistat	SIRT1	loss:cnaSKCM30	SKCM	3	52	0.0161527	0.116952	-1.56046	0.931994	0.0630831	0.453081	-1.14956	0.343825
Other pharmacogenomic interactions	341	Selisistat	SIRT1	loss:cnaSKCM5 (PAX5)	SKCM	4	52	0.0194919	0.116952	-1.29071	0.931994	0.0755134	0.453081	-0.91319	0.343825
Other pharmacogenomic interactions	263	FR-180204	ERK1, ERK2	BRAF_mut	THCA	7	16	0.0389983	0.116995	-1.28063	0.931833	0.00194889	0.00584668	-2.31429	2.23309
Other pharmacogenomic interactions	1526	Refametinib	MEK1, MEK2	RBM10_mut	LUAD	3	60	0.0167465	0.117226	-1.4993	0.930978	0.00402275	0.0844777	-1.808	1.07326
Other pharmacogenomic interactions	1019	Bosutinib	SRC, ABL, TEC	loss:cnaSTAD27 (MAP2K4)	STAD	4	22	0.00558469	0.117279	-1.68093	0.930781	0.667786	0.824912	-0.544944	0.0835922
Other pharmacogenomic interactions	273	CUDC-101	HDAC1-10, EGFR, ERBB2	gain:cnaESCA2 (KRAS)	ESCA	3	35	0.0146635	0.117308	-0.688174	0.930671	0.0462006	0.369605	-0.6926	0.432262
Other pharmacogenomic interactions	273	CUDC-101	HDAC1-10, EGFR, ERBB2	gain:cnaESCA3 (KRAS)	ESCA	3	35	0.0146635	0.117308	-0.688174	0.930671	0.0462006	0.369605	-0.6926	0.432262
Other pharmacogenomic interactions	1069	EHT-1864	RAC1, RAC2, RAC3	MGA_mut	COREAD	4	45	0.00383236	0.117424	-1.4965	0.930244	0.0200427	0.554514	-1.08361	0.256087
Other pharmacogenomic interactions	1069	EHT-1864	RAC1, RAC2, RAC3	PBRM1_mut	COREAD	4	45	0.00424423	0.117424	-1.76219	0.930244	0.0595205	0.69072	-1.16667	0.160698
Other pharmacogenomic interactions	1010	Gefitinib	EGFR	SMAD4_mut	HNSC	4	34	0.0281642	0.11829	-1.19407	0.927053	0.0376011	0.157925	-1.12388	0.80155
Other pharmacogenomic interactions	1059	AZD8055	MTORC1, MTORC2	TP53_mut	GBM	19	32	0.011462	0.118441	-0.913311	0.926498	0.00772015	0.119662	-0.993224	0.922042
Other pharmacogenomic interactions	186	Bexarotene	Retinioic X receptor (RXR) agonist	ARID2_mut	COREAD	3	38	0.00641098	0.118603	-1.75134	0.925904	0.145013	0.596165	-1.09391	0.224633
Other pharmacogenomic interactions	260	NG-25	TAK1, MAP4K2	loss:cnaKIRC22	KIRC	10	31	0.0282842	0.118793	-0.72521	0.925207	0.0948079	0.199097	-0.483216	0.700936
Other pharmacogenomic interactions	269	NSC-207895	MDM4	loss:cnaBLCA5 (FAT1,IRF2)	BLCA	5	19	0.0198035	0.118821	-1.37442	0.925108	0.0744504	0.446703	-1.02549	0.349982
Other pharmacogenomic interactions	83	JW-7-52-1	MTOR	loss:cnaKIRC12	KIRC	4	10	0.0397168	0.11915	-0.738812	0.923905	0.196855	0.509225	-0.311551	0.293091
Other pharmacogenomic interactions	83	JW-7-52-1	MTOR	loss:cnaKIRC13	KIRC	4	10	0.0397168	0.11915	-0.738812	0.923905	0.196855	0.509225	-0.311551	0.293091
Other pharmacogenomic interactions	83	JW-7-52-1	MTOR	loss:cnaKIRC14	KIRC	4	10	0.0397168	0.11915	-0.738812	0.923905	0.196855	0.509225	-0.311551	0.293091
Other pharmacogenomic interactions	83	JW-7-52-1	MTOR	loss:cnaKIRC15	KIRC	4	10	0.0397168	0.11915	-0.738812	0.923905	0.196855	0.509225	-0.311551	0.293091
Other pharmacogenomic interactions	1050	ZM447439	AURKA, AURKB	TP53BP1_mut	COREAD	3	39	0.0048396	0.119377	-1.81927	0.92308	0.00901796	0.200858	-1.72742	0.69711
Other pharmacogenomic interactions	106	XMD8-85	ERK5, BET	RNF43_mut	COREAD	4	15	0.00460564	0.119747	-1.94107	0.921736	0.018034	0.207403	-1.4169	0.683185
Other pharmacogenomic interactions	222	BX-912	PDK1 (PDPK1)	loss:cnaGBM100	GBM	3	35	0.0326647	0.119771	-1.38613	0.92165	0.00608822	0.0223235	-1.81528	1.65124
Other pharmacogenomic interactions	222	BX-912	PDK1 (PDPK1)	loss:cnaGBM102	GBM	3	35	0.0326647	0.119771	-1.38613	0.92165	0.00608822	0.0223235	-1.81528	1.65124
Other pharmacogenomic interactions	222	BX-912	PDK1 (PDPK1)	loss:cnaGBM103	GBM	3	35	0.0326647	0.119771	-1.38613	0.92165	0.00608822	0.0223235	-1.81528	1.65124
Other pharmacogenomic interactions	222	BX-912	PDK1 (PDPK1)	loss:cnaGBM104	GBM	3	35	0.0326647	0.119771	-1.38613	0.92165	0.00608822	0.0223235	-1.81528	1.65124
Other pharmacogenomic interactions	222	BX-912	PDK1 (PDPK1)	loss:cnaGBM105	GBM	3	35	0.0326647	0.119771	-1.38613	0.92165	0.00608822	0.0223235	-1.81528	1.65124
Other pharmacogenomic interactions	222	BX-912	PDK1 (PDPK1)	loss:cnaGBM106	GBM	3	35	0.0326647	0.119771	-1.38613	0.92165	0.00608822	0.0223235	-1.81528	1.65124
Other pharmacogenomic interactions	222	BX-912	PDK1 (PDPK1)	loss:cnaGBM97	GBM	3	35	0.0326647	0.119771	-1.38613	0.92165	0.00608822	0.0223235	-1.81528	1.65124
Other pharmacogenomic interactions	222	BX-912	PDK1 (PDPK1)	loss:cnaGBM98	GBM	3	35	0.0326647	0.119771	-1.38613	0.92165	0.00608822	0.0223235	-1.81528	1.65124
Other pharmacogenomic interactions	222	BX-912	PDK1 (PDPK1)	loss:cnaGBM99 (ANK3)	GBM	3	35	0.0326647	0.119771	-1.38613	0.92165	0.00608822	0.0223235	-1.81528	1.65124
Other pharmacogenomic interactions	1033	Vismodegib	SMO	loss:cnaBRCA17	BRCA	8	45	0.00254871	0.119789	-1.21569	0.921582	0.00595311	0.279796	-0.970948	0.553158
Other pharmacogenomic interactions	1036	PLX-4720	BRAF	BRAF_mut	COREAD	11	41	0.00155836	0.119993	-1.26071	0.920843	0.000220159	0.0169522	-1.37856	1.77077
Other pharmacogenomic interactions	235	QL-XII-47	BTK, BMX	loss:cnaKIRC23	KIRC	4	31	0.0458051	0.120238	-0.617291	0.919957	0.0270945	0.137506	-0.630154	0.861677
Other pharmacogenomic interactions	1143	HG-5-88-01	EGFR, ADCK4	gain:cnaGBM25 (CDK4)	GBM	3	18	0.0109386	0.120325	-1.92265	0.919646	0.073266	0.717418	-1.29174	0.144228
Other pharmacogenomic interactions	91	GSK319347A	IKK	BRAF_mut	SKCM	11	17	0.026753	0.120388	-0.391614	0.919415	0.311622	0.623283	-0.293228	0.205314
Other pharmacogenomic interactions	1242	(5Z)-7-Oxozeaenol	TAK1	BRAF_mut	SKCM	38	51	0.0164485	0.120622	-0.771084	0.918573	0.00297705	0.0654952	-0.965397	1.18379
Other pharmacogenomic interactions	205	Avagacestat	Amyloid beta20, Amyloid beta40	ARID1A_mut	BLCA	5	19	0.0151501	0.120698	-1.44049	0.918299	0.702347	0.903428	0.206789	-0.0441064
Other pharmacogenomic interactions	1495	Olaparib	PARP1, PARP2	SMAD4_mut	HNSC	5	39	0.00465938	0.121144	-1.48229	0.916699	0.0389725	0.506643	-1.06268	0.295298
Other pharmacogenomic interactions	1164	XMD8-92	MAPK7	NF2_mut	KIRC	4	19	0.00673449	0.121221	-1.93059	0.916423	0.0973021	0.875719	-1.29281	0.0576353
Other pharmacogenomic interactions	1072	Avagacestat	Amyloid beta20, Amyloid beta40	gain:cnaOV19	OV	3	33	0.00183935	0.121397	-2.21613	0.915791	0.856343	0.883104	-0.119354	0.0539882
Other pharmacogenomic interactions	182	Obatoclax Mesylate	BCL2, BCL-XL, BCL-W, MCL1	EP300_mut	PAAD	3	30	0.0270241	0.121609	-1.39053	0.915036	0.0176527	0.0794371	-1.57216	1.09998
Other pharmacogenomic interactions	345	KIN001-270	CDK9	BRAF_mut	THCA	7	16	0.0542333	0.121883	-1.16473	0.914058	0.196343	0.589029	-0.944022	0.229863
Other pharmacogenomic interactions	292	Masitinib	KIT, PDGFRA, PDGFRB	LARP4B_mut	UCEC	3	9	0.00872151	0.122101	-2.10473	0.913281	0.0116353	0.162895	-2.63929	0.788093
Other pharmacogenomic interactions	206	Ruxolitinib	JAK1, JAK2	TP53_mut	LGG	12	17	0.0174532	0.122172	-1.13361	0.913027	0.235522	0.274776	-0.493557	0.561021
Other pharmacogenomic interactions	1011	Navitoclax	BCL2, BCL-XL, BCL-W	gain:cnaBRCA13 (FGFR1,WHSC1L1)	BRCA	8	43	0.0155979	0.122183	-0.885421	0.912988	0.0261791	0.154667	-0.837218	0.810601
Other pharmacogenomic interactions	1020	Lenalidomide	CRBN	loss:cnaSTAD27 (MAP2K4)	STAD	4	22	0.0111569	0.122452	-1.67148	0.912034	0.472261	0.762883	-0.277365	0.117542
Other pharmacogenomic interactions	1371	PLX-4720	BRAF	STK11_mut	LUAD	11	59	0.00298981	0.122582	-1.15882	0.911573	0.0598376	0.613335	-0.714501	0.212302
Other pharmacogenomic interactions	151	QS11	ARFGAP1	LARP4B_mut	UCEC	3	9	0.00876945	0.122772	-2.65581	0.9109	0.161623	0.732042	-1.8902	0.135464
Other pharmacogenomic interactions	306	Fedratinib	JAK2	BRAF_mut	LUAD	3	61	0.0205816	0.12349	-1.26631	0.90837	0.0124233	0.0869633	-1.40976	1.06066
Other pharmacogenomic interactions	254	Quizartinib	FLT3	loss:cnaGBM132	GBM	3	35	0.0487422	0.12373	-1.28447	0.907524	0.367278	0.484808	-0.611003	0.314431
Other pharmacogenomic interactions	254	Quizartinib	FLT3	gain:cnaLUSC14 (CCT5,TERT,TRIO)	LUSC	5	14	0.0115081	0.124438	-1.54455	0.905045	0.00797194	0.127551	-1.64361	0.894316
Other pharmacogenomic interactions	254	Quizartinib	FLT3	gain:cnaLUSC37	LUSC	3	14	0.038887	0.124438	-1.52746	0.905045	0.0714376	0.1905	-1.30216	0.720105
Other pharmacogenomic interactions	254	Quizartinib	FLT3	gain:cnaLUSC6 (FGFR1,WHSC1L1)	LUSC	3	14	0.038887	0.124438	-1.52746	0.905045	0.0714376	0.1905	-1.30216	0.720105
Other pharmacogenomic interactions	254	Quizartinib	FLT3	gain:cnaLUSC7 (MYC)	LUSC	3	14	0.038887	0.124438	-1.52746	0.905045	0.0714376	0.1905	-1.30216	0.720105
Other pharmacogenomic interactions	290	KIN001-260	IKKB	CDH1_mut	BRCA	4	49	0.00244505	0.124698	-1.3027	0.904142	0.00134712	0.068703	-1.72855	1.16302
Other pharmacogenomic interactions	1166	QL-VIII-58	MTOR, ATR	gain:cnaPAAD2 (KRAS)	PAAD	3	10	0.0415747	0.124724	-1.84773	0.90405	0.0535685	0.160705	-1.72539	0.793969
Other pharmacogenomic interactions	89	Parthenolide	HDAC1	loss:cnaSKCM4 (BNC2,CDKN2A,JAK2,PSIP1)	SKCM	11	17	0.0138619	0.124757	-1.52637	0.903934	0.120981	0.544416	-0.839859	0.264069
Other pharmacogenomic interactions	302	PI-103	PI3Kalpha, DAPK3, CLK4, PIM3, HIPK2	LARP4B_mut	UCEC	3	9	0.0155946	0.124776	-1.05841	0.90387	0.0058434	0.0818076	-0.976009	1.08721
Other pharmacogenomic interactions	302	PI-103	PI3Kalpha, DAPK3, CLK4, PIM3, HIPK2	PTEN_mut	UCEC	6	9	0.0267377	0.124776	-1.44717	0.90387	0.104753	0.488846	-1.31567	0.310828
Other pharmacogenomic interactions	127	GSK269962A	ROCK1, ROCK2	RB1_mut	LGG	5	11	0.0208241	0.124945	-1.88395	0.903282	0.0388694	0.233216	-1.61835	0.632241
Other pharmacogenomic interactions	299	OSI-027	MTORC1, MTORC2	loss:cnaSTAD30	STAD	9	21	0.00569222	0.125229	-1.07426	0.902296	0.0253238	0.185708	-0.808518	0.73117
Other pharmacogenomic interactions	190	Bleomycin	dsDNA break induction	TP53_mut	THCA	11	16	0.0418686	0.125606	-0.928731	0.90099	0.0174258	0.0522773	-0.930703	1.28169
Other pharmacogenomic interactions	261	TL-1-85	TAK	TP53_mut	THCA	11	16	0.125805	0.125805	-0.578193	0.900302	0.116454	0.116454	-0.683344	0.933846
Other pharmacogenomic interactions	1194	SB-505124	ALK4, ALK5	gain:cnaHNSC2 (EGFR)	HNSC	11	39	0.0251641	0.12582	-0.823292	0.900249	0.0507052	0.253526	-0.722386	0.595977
Other pharmacogenomic interactions	154	CHIR-99021	GSK3A, GSK3B	loss:cnaKIRC19	KIRC	6	24	0.0532469	0.126461	-0.92365	0.898042	0.000684454	0.00322272	-1.83298	2.49178
Other pharmacogenomic interactions	1218	JQ1	BRD2, BRD3, BRD4, BRDT	loss:cnaLUAD28	LUAD	11	61	0.00603299	0.126693	-0.949792	0.897248	0.457482	0.843521	-0.240082	0.0739041
Other pharmacogenomic interactions	306	Fedratinib	JAK2	gain:cnaESCA2 (KRAS)	ESCA	3	35	0.0158552	0.126842	-0.913701	0.896737	0.018292	0.146336	-0.896164	0.834649
Other pharmacogenomic interactions	306	Fedratinib	JAK2	gain:cnaESCA3 (KRAS)	ESCA	3	35	0.0158552	0.126842	-0.913701	0.896737	0.018292	0.146336	-0.896164	0.834649
Other pharmacogenomic interactions	164	JQ12	HDAC1, HDAC2	loss:cnaKIRC7 (CDKN2A)	KIRC	20	24	0.0669364	0.127179	-0.7202	0.895584	0.307062	0.486182	-0.365408	0.313201
Other pharmacogenomic interactions	1375	Temozolomide	DNA alkylating agent	gain:cnaLGG16 (EGFR)	LGG	5	17	0.0361796	0.127466	-1.25408	0.894605	0.000290389	0.00203272	-2.62889	2.69192
Other pharmacogenomic interactions	1016	Temsirolimus	MTOR	gain:cnaCOREAD32 (STK4)	COREAD	7	43	0.00159355	0.127484	-1.39813	0.894543	0.0111807	0.894455	-0.864055	0.0484415
Other pharmacogenomic interactions	228	AKT inhibitor VIII	AKT1, AKT2, AKT3	ANK3_mut	UCEC	3	9	0.0112034	0.127841	-0.805163	0.893329	0.121568	0.390168	-0.00469481	0.408749
Other pharmacogenomic interactions	229	Enzastaurin	PKCB	loss:cnaSTAD48 (FAT1,IRF2)	STAD	8	21	0.011622	0.127842	-1.1803	0.893328	0.0446053	0.490659	-1.02775	0.309221
Other pharmacogenomic interactions	310	YM201636	PYKFYVE	loss:cnaGBM132	GBM	3	35	0.0504212	0.127992	-1.01342	0.892816	0.204452	0.337346	-0.583126	0.471925
Other pharmacogenomic interactions	1072	Avagacestat	Amyloid beta20, Amyloid beta40	KDR_mut	LUAD	3	58	0.00329483	0.128498	-1.84157	0.891102	0.542567	0.972199	-0.395932	0.0122449
Other pharmacogenomic interactions	52	GNF-2	BCR-ABL	NF2_mut	KIRC	3	11	0.0416486	0.128629	-1.43489	0.890661	0.315362	0.40997	-0.683802	0.387248
Other pharmacogenomic interactions	1241	CHIR-99021	GSK3A, GSK3B	SACS_mut	LAML	3	26	0.042088	0.128678	-1.11014	0.890495	0.0437876	0.131363	-1.34349	0.881528
Other pharmacogenomic interactions	253	XMD14-99	ALK, CDK7, LTK, others	loss:cnaOV34	OV	5	32	0.0205103	0.129215	-0.817076	0.888688	0.497959	0.969175	-0.0432742	0.0135979
Other pharmacogenomic interactions	303	PIK-93	PI3Kgamma	loss:cnaKIRC16	KIRC	6	31	0.00616791	0.129526	-1.04607	0.887643	0.0125246	0.263016	-1.03044	0.580018
Other pharmacogenomic interactions	231	FMK	RSK	loss:cnaESCA12	ESCA	3	25	0.0237492	0.129542	-1.41999	0.887589	0.210005	0.526019	-0.841848	0.278999
Other pharmacogenomic interactions	231	FMK	RSK	MLL2_mut	ESCA	3	25	0.0166217	0.129542	-1.21345	0.887589	0.141525	0.526019	-0.576415	0.278999
Other pharmacogenomic interactions	231	FMK	RSK	SMAD4_mut	ESCA	3	25	0.0277591	0.129542	-1.37937	0.887589	0.253812	0.526019	-0.774808	0.278999
Other pharmacogenomic interactions	281	Alectinib	ALK	loss:cnaBLCA18 (CHD9,CNOT1,CYLD,MMP2,NUP93)	BLCA	3	19	0.0107998	0.129597	-1.86883	0.887404	0.277347	0.665633	-0.778692	0.176765
Other pharmacogenomic interactions	1006	Cytarabine	Antimetabolite	ASXL1_mut	LAML	5	24	0.0432075	0.129622	-1.08112	0.88732	0.1014	0.304199	-0.745446	0.516843
Other pharmacogenomic interactions	197	Bryostatin 1	PKC	gain:cnaGBM71 (SOX2)	GBM	3	30	0.0108272	0.129926	-1.68643	0.886302	0.000951327	0.0228318	-2.14987	1.64146
Other pharmacogenomic interactions	283	Omipalisib	PI3K (class 1), MTORC1, MTORC2	PTEN_mut	UCEC	6	9	0.0185968	0.130178	-2.10291	0.885463	0.03093	0.14434	-1.61237	0.840614
Other pharmacogenomic interactions	1264	SGC0946	DOT1L	EP300_mut	ESCA	3	32	0.0244146	0.130211	-1.32522	0.885352	0.869541	0.869541	0.0636635	-0.0607101
Other pharmacogenomic interactions	1010	Gefitinib	EGFR	gain:cnaBRCA47 (EGFR)	BRCA	7	45	0.00277387	0.130372	-1.44099	0.884817	0.000858104	0.0403309	-1.46828	1.39436
Other pharmacogenomic interactions	258	STF-62247	Autophagy inducer	SACS_mut	LAML	3	25	0.021737	0.130422	-1.18207	0.884649	0.145929	0.528	-1.0946	0.277366
Other pharmacogenomic interactions	41	S-Trityl-L-cysteine	KIF11	loss:cnaCOREAD11	COREAD	3	15	0.00869851	0.130517	-1.56097	0.884334	0.0134865	0.161838	-1.73769	0.79092
Other pharmacogenomic interactions	41	S-Trityl-L-cysteine	KIF11	loss:cnaCOREAD19	COREAD	4	15	0.0108764	0.130517	-1.72798	0.884334	0.00734467	0.161838	-1.69493	0.79092
Other pharmacogenomic interactions	136	Mitomycin-C	DNA crosslinker	gain:cnaLGG16 (EGFR)	LGG	5	16	0.0374882	0.131209	-1.29584	0.882038	0.0118018	0.0490082	-1.63027	1.30973
Other pharmacogenomic interactions	1033	Vismodegib	SMO	BRAF_mut	THCA	5	13	0.087727	0.131591	-1.35572	0.880775	0.0722129	0.108319	-1.54642	0.965294
Other pharmacogenomic interactions	253	XMD14-99	ALK, CDK7, LTK, others	gain:cnaBRCA64 (SDHC)	BRCA	8	48	0.00274416	0.13172	-1.08387	0.88035	0.0424107	0.876036	-0.660911	0.057478
Other pharmacogenomic interactions	305	TPCA-1	IKK2	loss:cnaLUAD14	LUAD	7	61	0.00313949	0.131859	-1.31126	0.879891	0.00320489	0.134605	-1.39432	0.870937
Other pharmacogenomic interactions	184	BMS-754807	IGF1R, IR	loss:cnaBLCA18 (CHD9,CNOT1,CYLD,MMP2,NUP93)	BLCA	3	19	0.0220316	0.132189	-1.55699	0.878803	0.0181611	0.108967	-1.65889	0.962706
Other pharmacogenomic interactions	1011	Navitoclax	BCL2, BCL-XL, BCL-W	loss:cnaBRCA29 (MAP2K4)	BRCA	5	43	0.019716	0.132379	-1.08462	0.878181	0.0152766	0.119667	-1.05343	0.922025
Other pharmacogenomic interactions	1170	CCT-018159	HSP90	gain:cnaPAAD3	PAAD	3	29	0.044133	0.132399	-1.45502	0.878115	0.0578573	0.126643	-1.21471	0.897419
Other pharmacogenomic interactions	1262	UNC1215	L3MBTL3	gain:cnaHNSC2 (EGFR)	HNSC	10	39	0.00509323	0.132424	-1.10419	0.878034	0.0101301	0.202267	-0.986777	0.694075
Other pharmacogenomic interactions	177	GSK650394	SGK2, SGK3	PTEN_mut	UCEC	6	9	0.0189485	0.13264	-1.60335	0.877327	0.092647	0.432353	-1.75312	0.364162
Other pharmacogenomic interactions	1242	(5Z)-7-Oxozeaenol	TAK1	BRAF_mut	THCA	7	16	0.0442688	0.132806	-1.27929	0.876781	0.0271794	0.0815383	-1.36692	1.08864
Other pharmacogenomic interactions	277	Linifanib	VEGFR1, VEGFR2, VEGFR3, CSF1R, FLT3, KIT	NCOR1_mut	COREAD	7	46	0.00455873	0.133723	-1.45068	0.873795	0.000617846	0.0271852	-1.85242	1.56567
Other pharmacogenomic interactions	238	Idelalisib	PI3Kdelta	gain:cnaBLCA23 (MYC)	BLCA	4	19	0.0223875	0.134325	-1.53594	0.871844	0.0399972	0.159989	-1.23323	0.79591
Other pharmacogenomic interactions	1013	Nilotinib	ABL	loss:cnaPAAD4 (CDKN2A)	PAAD	15	23	0.0447927	0.134378	-0.92351	0.871672	0.410694	0.512898	-0.25322	0.289969
Other pharmacogenomic interactions	1019	Bosutinib	SRC, ABL, TEC	ASXL1_mut	LAML	5	24	0.0674932	0.134986	-0.919881	0.86971	0.190671	0.381343	-0.505349	0.418684
Other pharmacogenomic interactions	166	FTI-277	Farnesyl-transferase (FNTA)	loss:cnaKIRC24 (FAT1,IRF2)	KIRC	5	24	0.0284313	0.135049	-1.19106	0.86951	0.326845	0.56455	-0.524074	0.248297
Other pharmacogenomic interactions	272	AR-42	HDAC1	gain:cnaESCA2 (KRAS)	ESCA	3	35	0.0169118	0.135294	-0.688324	0.86872	0.0994397	0.45927	-0.314876	0.337932
Other pharmacogenomic interactions	272	AR-42	HDAC1	gain:cnaESCA3 (KRAS)	ESCA	3	35	0.0169118	0.135294	-0.688324	0.86872	0.0994397	0.45927	-0.314876	0.337932
Other pharmacogenomic interactions	341	Selisistat	SIRT1	loss:cnaLUSC3	LUSC	6	14	0.0169831	0.135864	-1.54044	0.866894	0.955817	0.992302	0.0213686	-0.00335622
Other pharmacogenomic interactions	341	Selisistat	SIRT1	loss:cnaLUSC4	LUSC	6	14	0.0104084	0.135864	-1.68819	0.866894	0.400431	0.992302	0.478749	-0.00335622
Other pharmacogenomic interactions	32	Tozasertib	AURKA, AURKB, AURKC, others	loss:cnaSTAD17 (CDKN2A)	STAD	3	7	0.0340707	0.136283	-3.77818	0.865559	0.101229	0.404917	-2.16732	0.392633
Other pharmacogenomic interactions	249	Cabozantinib	VEGFR, MET, RET, KIT, FLT1, FLT3, FLT4, TIE2,AXL	CDKN2A_mut	PAAD	4	29	0.015165	0.136485	-1.31147	0.864914	0.130978	0.770731	-0.81999	0.113097
Other pharmacogenomic interactions	1018	Veliparib	PARP1, PARP2	gain:cnaLUAD5 (CUL2,EPC1)	LUAD	4	53	0.0110766	0.136611	-1.33788	0.864514	0.238744	0.8348	-0.676628	0.0784177
Other pharmacogenomic interactions	1378	Bleomycin (50 uM)	dsDNA break induction	gain:cnaLGG16 (EGFR)	LGG	5	17	0.0196169	0.137318	-1.35472	0.862271	0.0111591	0.0781136	-1.53665	1.10727
Other pharmacogenomic interactions	312	Tivozanib	VEGFR1, VEGFR2, VEGFR3	loss:cnaKIRC19	KIRC	8	31	0.0131036	0.137588	-0.874351	0.86142	0.579977	0.99873	0.187854	-0.000552051
Other pharmacogenomic interactions	299	OSI-027	MTORC1, MTORC2	loss:cnaKIRC23	KIRC	4	31	0.0327974	0.137749	-0.803847	0.860911	0.00801004	0.115745	-1.21928	0.936496
Other pharmacogenomic interactions	150	Bicalutamide	AR	gain:cnaBRCA48	BRCA	5	48	0.00543539	0.138602	-1.37667	0.858229	0.724304	0.991527	-0.0563265	0.00369556
Other pharmacogenomic interactions	344	THZ-2-49	CDK9	gain:cnaHNSC8	HNSC	4	40	0.00557443	0.139361	-1.57207	0.85586	0.0136046	0.340115	-1.38352	0.468375
Other pharmacogenomic interactions	1050	ZM447439	AURKA, AURKB	CTCF_mut	UCEC	3	7	0.0557646	0.139412	-0.690792	0.855701	0.468173	0.780288	-1.42868	0.107745
Other pharmacogenomic interactions	1050	ZM447439	AURKA, AURKB	EP300_mut	UCEC	4	7	0.0557646	0.139412	-0.00346103	0.855701	0.468173	0.780288	-0.828628	0.107745
Other pharmacogenomic interactions	1032	Afatinib	ERBB2, EGFR	CTCF_mut	UCEC	3	8	0.0126923	0.139615	-2.46688	0.855067	0.418912	0.917433	-1.58986	0.0374259
Other pharmacogenomic interactions	166	FTI-277	Farnesyl-transferase (FNTA)	EP300_mut	DLBC	6	30	0.0175069	0.140055	-1.16796	0.8537	0.78455	0.838278	-0.0546812	0.0766121
Other pharmacogenomic interactions	176	IPA-3	PAK1	EP300_mut	PAAD	3	30	0.0155778	0.140201	-1.5324	0.85325	0.0271859	0.244673	-1.34737	0.611414
Other pharmacogenomic interactions	1203	QL-XII-61	BMX, BTK	ARID2_mut	COREAD	5	36	0.00902286	0.140757	-1.43166	0.851531	0.0412454	0.381013	-1.2632	0.41906
Other pharmacogenomic interactions	1203	QL-XII-61	BMX, BTK	MAP2K4_mut	COREAD	3	36	0.00823433	0.140757	-1.87425	0.851531	0.184996	0.866943	-1.08172	0.0620093
Other pharmacogenomic interactions	1203	QL-XII-61	BMX, BTK	PIK3R1_mut	COREAD	3	36	0.00823433	0.140757	-1.87425	0.851531	0.184996	0.866943	-1.08172	0.0620093
Other pharmacogenomic interactions	1072	Avagacestat	Amyloid beta20, Amyloid beta40	BCOR_mut	COREAD	4	46	0.00339852	0.141039	-1.72613	0.850662	0.173725	0.957181	-0.869152	0.0190061
Other pharmacogenomic interactions	206	Ruxolitinib	JAK1, JAK2	PIK3R1_mut	UCEC	3	9	0.0100932	0.141305	-0.905318	0.849844	0.965544	0.970511	-0.483614	0.0129997
Other pharmacogenomic interactions	1494	SN-38	TOP1	gain:cnaLGG16 (EGFR)	LGG	5	17	0.0201994	0.141396	-1.28073	0.849564	0.00152446	0.0106712	-1.83687	1.97178
Other pharmacogenomic interactions	275	I-BET-762	BRD2, BRD3, BRD4	loss:cnaSTAD48 (FAT1,IRF2)	STAD	8	21	0.00642713	0.141397	-1.03842	0.84956	0.0285435	0.307942	-1.0078	0.511532
Other pharmacogenomic interactions	30	Sorafenib	PDGFR, KIT, VEGFR, RAF	KRAS_mut	LUAD	4	13	0.0472495	0.141749	-1.65813	0.848481	0.131357	0.39407	-1.23694	0.404427
Other pharmacogenomic interactions	1011	Navitoclax	BCL2, BCL-XL, BCL-W	loss:cnaBRCA18	BRCA	12	43	0.0241829	0.142074	-0.942208	0.847484	0.108617	0.300295	-0.707602	0.522453
Other pharmacogenomic interactions	1069	EHT-1864	RAC1, RAC2, RAC3	CDKN2A_mut	HNSC	9	41	0.00547572	0.142369	-1.0531	0.846585	0.079876	0.519194	-0.700802	0.28467
Other pharmacogenomic interactions	1526	Refametinib	MEK1, MEK2	loss:cnaPRAD7	PRAD	3	6	0.142525	0.142525	-1.75743	0.84611	0.054652	0.054652	-2.06494	1.26239
Other pharmacogenomic interactions	1067	CCT007093	PPM1D	SMAD4_mut	PAAD	8	30	0.0158388	0.142549	-1.04606	0.846035	0.470611	0.658555	-0.286165	0.181408
Other pharmacogenomic interactions	1194	SB-505124	ALK4, ALK5	loss:cnaGBM93	GBM	6	35	0.0216587	0.142948	-1.13256	0.844823	0.0951535	0.505459	-0.821287	0.296314
Other pharmacogenomic interactions	1194	SB-505124	ALK4, ALK5	loss:cnaGBM94	GBM	6	35	0.0216587	0.142948	-1.13256	0.844823	0.0951535	0.505459	-0.821287	0.296314
Other pharmacogenomic interactions	1194	SB-505124	ALK4, ALK5	loss:cnaGBM95	GBM	6	35	0.0216587	0.142948	-1.13256	0.844823	0.0951535	0.505459	-0.821287	0.296314
Other pharmacogenomic interactions	1062	Selumetinib	MEK1, MEK2	loss:cnaDLBC2	DLBC	3	32	0.017874	0.142992	-1.60696	0.844689	0.214864	0.451553	-0.835458	0.345291
Other pharmacogenomic interactions	133	Doxorubicin	Anthracycline	TP53_mut	THCA	11	16	0.0478643	0.143593	-0.798058	0.842867	0.0762759	0.228828	-0.627122	0.640491
Other pharmacogenomic interactions	1498	Selumetinib	MEK1, MEK2	NF1_mut	LGG	3	17	0.0410581	0.143703	-1.26062	0.842533	0.187863	0.657519	-0.778333	0.182092
Other pharmacogenomic interactions	245	UNC0638	G9a and GLP methyltransferases	gain:cnaESCA2 (KRAS)	ESCA	3	35	0.0179941	0.143953	-0.614778	0.841779	0.135454	0.540632	-0.356558	0.267098
Other pharmacogenomic interactions	245	UNC0638	G9a and GLP methyltransferases	gain:cnaESCA3 (KRAS)	ESCA	3	35	0.0179941	0.143953	-0.614778	0.841779	0.135454	0.540632	-0.356558	0.267098
Other pharmacogenomic interactions	271	VNLG/124	HDAC,RAR	loss:cnaLIHC10 (RB1)	LIHC	3	17	0.0479902	0.143971	-1.40981	0.841726	0.0281312	0.0843936	-1.54841	1.07369
Other pharmacogenomic interactions	1261	rTRAIL	TRAIL receptor agonist	BRAF_mut	LUAD	3	60	0.00342922	0.144027	-1.87516	0.841556	0.00325596	0.13675	-1.84569	0.864071
Other pharmacogenomic interactions	164	JQ12	HDAC1, HDAC2	loss:cnaCOREAD19	COREAD	16	39	0.00384537	0.144201	-1.24442	0.841031	0.00329852	0.247389	-1.1833	0.606619
Other pharmacogenomic interactions	290	KIN001-260	IKKB	loss:cnaKIRC16	KIRC	6	31	0.00687967	0.144473	-1.16023	0.840213	0.323527	0.923994	-0.332499	0.0343308
Other pharmacogenomic interactions	1241	CHIR-99021	GSK3A, GSK3B	EGFR_mut	ESCA	3	33	0.00908663	0.145386	-2.06017	0.837477	0.448782	0.681587	-0.67022	0.166479
Other pharmacogenomic interactions	166	FTI-277	Farnesyl-transferase (FNTA)	loss:cnaESCA14	ESCA	10	27	0.0103867	0.145414	-1.07578	0.837393	0.932563	0.939454	-0.00739973	0.0271246
Other pharmacogenomic interactions	1262	UNC1215	L3MBTL3	TP53_mut	THCA	11	16	0.048488	0.145464	-0.958254	0.837244	0.672719	0.672719	-0.075179	0.172166
Other pharmacogenomic interactions	164	JQ12	HDAC1, HDAC2	SETD2_mut	KIRC	4	24	0.0844811	0.145922	-0.905899	0.83588	0.211836	0.478347	-0.672751	0.320257
Other pharmacogenomic interactions	304	SB52334	ALK5	loss:cnaKIRC12	KIRC	12	31	0.0347446	0.145927	-0.628028	0.835864	0.0672582	0.282484	-0.396383	0.549005
Other pharmacogenomic interactions	304	SB52334	ALK5	loss:cnaKIRC13	KIRC	12	31	0.0347446	0.145927	-0.628028	0.835864	0.0672582	0.282484	-0.396383	0.549005
Other pharmacogenomic interactions	304	SB52334	ALK5	loss:cnaKIRC14	KIRC	12	31	0.0347446	0.145927	-0.628028	0.835864	0.0672582	0.282484	-0.396383	0.549005
Other pharmacogenomic interactions	304	SB52334	ALK5	loss:cnaKIRC15	KIRC	12	31	0.0347446	0.145927	-0.628028	0.835864	0.0672582	0.282484	-0.396383	0.549005
Other pharmacogenomic interactions	263	FR-180204	ERK1, ERK2	gain:cnaLUAD10 (AHR,HDAC9)	LUAD	9	61	0.0173911	0.146085	-0.9262	0.835395	0.183907	0.71207	-0.583795	0.147477
Other pharmacogenomic interactions	263	FR-180204	ERK1, ERK2	gain:cnaLUAD11 (EGFR)	LUAD	10	61	0.0164642	0.146085	-0.904217	0.835395	0.14079	0.71207	-0.58109	0.147477
Other pharmacogenomic interactions	197	Bryostatin 1	PKC	CDKN1A_mut	BLCA	3	19	0.0180695	0.14613	-1.60931	0.83526	0.254523	0.803745	-0.834735	0.0948815
Other pharmacogenomic interactions	197	Bryostatin 1	PKC	loss:cnaBLCA18 (CHD9,CNOT1,CYLD,MMP2,NUP93)	BLCA	3	19	0.024355	0.14613	-1.5196	0.83526	0.683727	0.941224	-0.353217	0.0263071
Other pharmacogenomic interactions	281	Alectinib	ALK	gain:cnaBRCA47 (EGFR)	BRCA	7	48	0.00304598	0.146207	-1.30517	0.835032	0.0314739	0.503582	-0.837006	0.29793
Other pharmacogenomic interactions	1062	Selumetinib	MEK1, MEK2	NRAS_mut	LAML	7	23	0.0292665	0.146333	-1.12043	0.834659	0.0387719	0.19386	-1.05185	0.712512
Other pharmacogenomic interactions	238	Idelalisib	PI3Kdelta	loss:cnaKIRC23	KIRC	4	31	0.0348591	0.146408	-1.16442	0.834434	0.165099	0.449021	-0.587193	0.347733
Other pharmacogenomic interactions	326	GSK690693	AKT1, AKT2, AKT3	MLL2_mut	COREAD	15	46	0.018307	0.146456	-0.338838	0.834292	0.0598557	0.36489	-0.621831	0.437838
Other pharmacogenomic interactions	211	TL-2-105	not defined	loss:cnaGBM47	GBM	6	35	0.0888128	0.146541	-0.750301	0.834041	0.0415289	0.123884	-0.857191	0.906986
Other pharmacogenomic interactions	291	KIN001-266	MAP3K8	BRAF_mut	THCA	7	16	0.0924812	0.146697	-1.10502	0.833579	0.0583751	0.175125	-1.29871	0.756651
Other pharmacogenomic interactions	249	Cabozantinib	VEGFR, MET, RET, KIT, FLT1, FLT3, FLT4, TIE2,AXL	loss:cnaSTAD12	STAD	4	21	0.0133374	0.146712	-1.56582	0.833536	0.0180506	0.13992	-1.46332	0.854119
Other pharmacogenomic interactions	152	CP466722	ATM	loss:cnaGBM100	GBM	3	35	0.0535074	0.147145	-1.00234	0.832254	0.0474688	0.142406	-1.08519	0.84647
Other pharmacogenomic interactions	152	CP466722	ATM	loss:cnaGBM102	GBM	3	35	0.0535074	0.147145	-1.00234	0.832254	0.0474688	0.142406	-1.08519	0.84647
Other pharmacogenomic interactions	152	CP466722	ATM	loss:cnaGBM103	GBM	3	35	0.0535074	0.147145	-1.00234	0.832254	0.0474688	0.142406	-1.08519	0.84647
Other pharmacogenomic interactions	152	CP466722	ATM	loss:cnaGBM104	GBM	3	35	0.0535074	0.147145	-1.00234	0.832254	0.0474688	0.142406	-1.08519	0.84647
Other pharmacogenomic interactions	152	CP466722	ATM	loss:cnaGBM105	GBM	3	35	0.0535074	0.147145	-1.00234	0.832254	0.0474688	0.142406	-1.08519	0.84647
Other pharmacogenomic interactions	152	CP466722	ATM	loss:cnaGBM106	GBM	3	35	0.0535074	0.147145	-1.00234	0.832254	0.0474688	0.142406	-1.08519	0.84647
Other pharmacogenomic interactions	152	CP466722	ATM	loss:cnaGBM134	GBM	3	35	0.0213637	0.147145	-1.22744	0.832254	0.0221515	0.142406	-1.27754	0.84647
Other pharmacogenomic interactions	152	CP466722	ATM	loss:cnaGBM135	GBM	3	35	0.0213637	0.147145	-1.22744	0.832254	0.0221515	0.142406	-1.27754	0.84647
Other pharmacogenomic interactions	152	CP466722	ATM	loss:cnaGBM97	GBM	3	35	0.0535074	0.147145	-1.00234	0.832254	0.0474688	0.142406	-1.08519	0.84647
Other pharmacogenomic interactions	152	CP466722	ATM	loss:cnaGBM98	GBM	3	35	0.0535074	0.147145	-1.00234	0.832254	0.0474688	0.142406	-1.08519	0.84647
Other pharmacogenomic interactions	152	CP466722	ATM	loss:cnaGBM99 (ANK3)	GBM	3	35	0.0535074	0.147145	-1.00234	0.832254	0.0474688	0.142406	-1.08519	0.84647
Other pharmacogenomic interactions	152	CP466722	ATM	loss:cnaGBM47	GBM	6	35	0.0332608	0.147145	-0.562562	0.832254	0.102853	0.226276	-0.429205	0.645362
Other pharmacogenomic interactions	228	AKT inhibitor VIII	AKT1, AKT2, AKT3	RNF43_mut	PAAD	4	30	0.0163688	0.147319	-1.44938	0.83174	0.0606582	0.545924	-1.15737	0.262868
Other pharmacogenomic interactions	179	5-Fluorouracil	Antimetabolite (DNA & RNA)	loss:cnaKIRC12	KIRC	11	30	0.0311101	0.147773	-0.473665	0.830404	0.0103593	0.0492065	-0.511731	1.30798
Other pharmacogenomic interactions	179	5-Fluorouracil	Antimetabolite (DNA & RNA)	loss:cnaKIRC13	KIRC	11	30	0.0311101	0.147773	-0.473665	0.830404	0.0103593	0.0492065	-0.511731	1.30798
Other pharmacogenomic interactions	179	5-Fluorouracil	Antimetabolite (DNA & RNA)	loss:cnaKIRC14	KIRC	11	30	0.0311101	0.147773	-0.473665	0.830404	0.0103593	0.0492065	-0.511731	1.30798
Other pharmacogenomic interactions	179	5-Fluorouracil	Antimetabolite (DNA & RNA)	loss:cnaKIRC15	KIRC	11	30	0.0311101	0.147773	-0.473665	0.830404	0.0103593	0.0492065	-0.511731	1.30798
Other pharmacogenomic interactions	156	AZD6482	PI3Kbeta	EP300_mut	DLBC	6	30	0.0185712	0.14857	-1.22014	0.828069	0.0164958	0.131966	-1.20476	0.879537
Other pharmacogenomic interactions	275	I-BET-762	BRD2, BRD3, BRD4	loss:cnaBLCA18 (CHD9,CNOT1,CYLD,MMP2,NUP93)	BLCA	3	19	0.012383	0.148596	-1.82321	0.827992	0.0332863	0.399436	-1.55629	0.398553
Other pharmacogenomic interactions	204	Tipifarnib	Farnesyl-transferase (FNTA)	ARID1A_mut	STAD	5	20	0.0148718	0.148718	-0.728796	0.827637	0.0438112	0.219056	-0.581811	0.659445
Other pharmacogenomic interactions	1032	Afatinib	ERBB2, EGFR	gain:cnaHNSC2 (EGFR)	HNSC	8	34	0.00709795	0.149057	-1.10687	0.826648	0.0143235	0.253627	-0.994888	0.595804
Other pharmacogenomic interactions	1529	Pevonedistat	NAE	gain:cnaLGG16 (EGFR)	LGG	4	13	0.0213023	0.149116	-1.71228	0.826476	0.00746892	0.0522825	-2.10089	1.28164
Other pharmacogenomic interactions	230	GSK429286A	ROCK1, ROCK2	loss:cnaLUAD14	LUAD	7	61	0.00710141	0.14913	-1.10528	0.826436	0.00279807	0.117519	-1.35185	0.929892
Other pharmacogenomic interactions	185	Linsitinib	IGF1R	loss:cnaHNSC28 (ATP1A1,CSDE1,NRAS)	HNSC	4	42	0.0194145	0.149149	-1.24609	0.826381	0.0261244	0.301221	-1.22283	0.521115
Other pharmacogenomic interactions	185	Linsitinib	IGF1R	NFE2L2_mut	HNSC	3	42	0.00923282	0.149149	-1.61069	0.826381	0.030446	0.301221	-1.3597	0.521115
Other pharmacogenomic interactions	185	Linsitinib	IGF1R	NOTCH1_mut	HNSC	3	42	0.0210231	0.149149	-1.46128	0.826381	0.0347562	0.301221	-1.32271	0.521115
Other pharmacogenomic interactions	152	CP466722	ATM	PTEN_mut	UCEC	6	9	0.0213456	0.149419	-0.959	0.825594	0.0220819	0.154573	-1.14737	0.810866
Other pharmacogenomic interactions	310	YM201636	PYKFYVE	loss:cnaESCA1	ESCA	6	35	0.0186776	0.149421	-1.39269	0.82559	0.142733	0.922013	-1.08878	0.0352631
Other pharmacogenomic interactions	1049	PD173074	FGFR1, FGFR3	CHD4_mut	UCEC	3	8	0.0448499	0.1495	-1.89176	0.82536	0.00175372	0.0175372	-0.688892	1.75604
Other pharmacogenomic interactions	265	Tubastatin A	HDAC1, HDAC6, HDAC8	loss:cnaHNSC3	HNSC	3	40	0.00598945	0.149736	-1.69778	0.824673	0.0781595	0.651967	-1.02412	0.185774
Other pharmacogenomic interactions	238	Idelalisib	PI3Kdelta	SOX9_mut	COREAD	4	46	0.00340828	0.149964	-1.4814	0.824012	0.0165327	0.72744	-1.26963	0.138203
Other pharmacogenomic interactions	1032	Afatinib	ERBB2, EGFR	loss:cnaGBM68 (CDKN2C,FAF1)	GBM	6	33	0.0728434	0.150239	-0.844585	0.823216	0.00304864	0.100605	-1.63378	0.997379
Other pharmacogenomic interactions	302	PI-103	PI3Kalpha, DAPK3, CLK4, PIM3, HIPK2	gain:cnaBLCA23 (MYC)	BLCA	4	19	0.0376198	0.150479	-1.00386	0.822524	0.0685742	0.274297	-0.90386	0.561779
Other pharmacogenomic interactions	302	PI-103	PI3Kalpha, DAPK3, CLK4, PIM3, HIPK2	TP53_mut	BLCA	15	19	0.0181474	0.150479	-1.4153	0.822524	0.0383867	0.274297	-1.24109	0.561779
Other pharmacogenomic interactions	1008	Methotrexate	Antimetabolite	gain:cnaGBM25 (CDK4)	GBM	4	33	0.00456812	0.150748	-1.59518	0.821749	0.0749827	0.659472	-0.920045	0.180803
Other pharmacogenomic interactions	287	KIN001-244	PDK1 (PDPK1)	TP53_mut	PAAD	24	29	0.0167501	0.150751	-1.27318	0.821739	0.0110069	0.099062	-1.40501	1.00409
Other pharmacogenomic interactions	1526	Refametinib	MEK1, MEK2	loss:cnaLUSC3	LUSC	7	15	0.0837623	0.150772	-1.07175	0.821679	0.0971473	0.174865	-0.997517	0.757297
Other pharmacogenomic interactions	1218	JQ1	BRD2, BRD3, BRD4, BRDT	SMAD4_mut	ESCA	4	33	0.0282783	0.150817	-1.33383	0.821549	0.58435	0.972241	-0.404192	0.0122259
Other pharmacogenomic interactions	332	XMD15-27	CAMK2	gain:cnaOV26	OV	3	32	0.00239498	0.150884	-1.82337	0.821357	0.743591	0.823492	-0.0474242	0.0843407
Other pharmacogenomic interactions	185	Linsitinib	IGF1R	gain:cnaBLCA23 (MYC)	BLCA	4	19	0.0251593	0.150956	-1.41325	0.82115	0.102222	0.533813	-0.922368	0.27261
Other pharmacogenomic interactions	1067	CCT007093	PPM1D	CEP290_mut	COREAD	4	45	0.00364585	0.151303	-1.60746	0.820153	0.495214	0.97596	-0.331708	0.0105681
Other pharmacogenomic interactions	221	TAK-715	p38alpha, p38beta	EP300_mut	PAAD	3	30	0.0336406	0.151383	-1.43992	0.819924	0.126847	0.228325	-0.812737	0.641446
Other pharmacogenomic interactions	193	GW-2580	CSF1R	GNAS_mut	COREAD	3	46	0.00345238	0.151905	-2.04856	0.818429	2.16319e-06	0.000190361	-3.43225	3.72042
Other pharmacogenomic interactions	193	GW-2580	CSF1R	NR4A2_mut	COREAD	5	46	0.00237555	0.151905	-1.76533	0.818429	0.0860257	0.504684	-1.15182	0.29698
Other pharmacogenomic interactions	1052	RO-3306	CDK1	PIK3R1_mut	UCEC	3	8	0.0151912	0.151912	-1.2646	0.818408	0.393216	0.49152	-0.542127	0.308459
Other pharmacogenomic interactions	245	UNC0638	G9a and GLP methyltransferases	TP53_mut	PAAD	24	29	0.0169187	0.152268	-1.2963	0.81739	0.270149	0.88531	-0.673662	0.0529044
Other pharmacogenomic interactions	1031	Elesclomol	HSP90	TP53_mut	LIHC	10	14	0.076189	0.152378	-1.434	0.817077	0.176286	0.352572	-1.14968	0.452753
Other pharmacogenomic interactions	308	WIKI4	TNKS1, TNKS2	loss:cnaGBM134	GBM	3	35	0.0508017	0.152405	-1.27108	0.817001	0.0749737	0.185047	-1.15689	0.732719
Other pharmacogenomic interactions	308	WIKI4	TNKS1, TNKS2	loss:cnaGBM135	GBM	3	35	0.0508017	0.152405	-1.27108	0.817001	0.0749737	0.185047	-1.15689	0.732719
Other pharmacogenomic interactions	140	Vinorelbine	Microtubule destabiliser	loss:cnaBRCA17	BRCA	10	47	0.00953245	0.152519	-1.01595	0.816676	0.0319775	0.325681	-0.854349	0.487208
Other pharmacogenomic interactions	306	Fedratinib	JAK2	gain:cnaGBM123 (EGFR)	GBM	10	35	0.0464943	0.152824	-0.691347	0.815807	0.00720744	0.0509494	-0.975963	1.29286
Other pharmacogenomic interactions	306	Fedratinib	JAK2	loss:cnaGBM100	GBM	3	35	0.0555725	0.152824	-1.25714	0.815807	0.0154392	0.0509494	-1.60178	1.29286
Other pharmacogenomic interactions	306	Fedratinib	JAK2	loss:cnaGBM102	GBM	3	35	0.0555725	0.152824	-1.25714	0.815807	0.0154392	0.0509494	-1.60178	1.29286
Other pharmacogenomic interactions	306	Fedratinib	JAK2	loss:cnaGBM103	GBM	3	35	0.0555725	0.152824	-1.25714	0.815807	0.0154392	0.0509494	-1.60178	1.29286
Other pharmacogenomic interactions	306	Fedratinib	JAK2	loss:cnaGBM104	GBM	3	35	0.0555725	0.152824	-1.25714	0.815807	0.0154392	0.0509494	-1.60178	1.29286
Other pharmacogenomic interactions	306	Fedratinib	JAK2	loss:cnaGBM105	GBM	3	35	0.0555725	0.152824	-1.25714	0.815807	0.0154392	0.0509494	-1.60178	1.29286
Other pharmacogenomic interactions	306	Fedratinib	JAK2	loss:cnaGBM106	GBM	3	35	0.0555725	0.152824	-1.25714	0.815807	0.0154392	0.0509494	-1.60178	1.29286
Other pharmacogenomic interactions	306	Fedratinib	JAK2	loss:cnaGBM97	GBM	3	35	0.0555725	0.152824	-1.25714	0.815807	0.0154392	0.0509494	-1.60178	1.29286
Other pharmacogenomic interactions	306	Fedratinib	JAK2	loss:cnaGBM98	GBM	3	35	0.0555725	0.152824	-1.25714	0.815807	0.0154392	0.0509494	-1.60178	1.29286
Other pharmacogenomic interactions	306	Fedratinib	JAK2	loss:cnaGBM99 (ANK3)	GBM	3	35	0.0555725	0.152824	-1.25714	0.815807	0.0154392	0.0509494	-1.60178	1.29286
Other pharmacogenomic interactions	306	Fedratinib	JAK2	loss:cnaGBM101	GBM	5	35	0.0355727	0.152824	-0.964335	0.815807	0.0357188	0.107157	-0.978843	0.969981
Other pharmacogenomic interactions	253	XMD14-99	ALK, CDK7, LTK, others	loss:cnaLGG1 (BNC2,CDKN2A,JAK2,PSIP1)	LGG	9	17	0.0437352	0.153073	-1.12866	0.815101	0.444988	0.622983	-0.47367	0.205524
Other pharmacogenomic interactions	253	XMD14-99	ALK, CDK7, LTK, others	loss:cnaLGG14 (CUL2)	LGG	4	17	0.0292886	0.153073	-1.38617	0.815101	0.434997	0.622983	-0.385965	0.205524
Other pharmacogenomic interactions	140	Vinorelbine	Microtubule destabiliser	loss:cnaCOREAD19	COREAD	16	39	0.00408253	0.153095	-1.32445	0.815039	0.00156345	0.0586293	-1.42608	1.23189
Other pharmacogenomic interactions	1143	HG-5-88-01	EGFR, ADCK4	loss:cnaOV58	OV	5	22	0.00318961	0.153101	-1.91487	0.815021	0.0659201	0.615647	-1.1508	0.210668
Other pharmacogenomic interactions	206	Ruxolitinib	JAK1, JAK2	loss:cnaKIRC3	KIRC	3	31	0.0146023	0.153324	-1.79784	0.814389	0.82388	0.964702	0.153928	-0.0156069
Other pharmacogenomic interactions	206	Ruxolitinib	JAK1, JAK2	loss:cnaKIRC4	KIRC	3	31	0.0146023	0.153324	-1.79784	0.814389	0.82388	0.964702	0.153928	-0.0156069
Other pharmacogenomic interactions	1054	Palbociclib	CDK4, CDK6	KRAS_mut	OV	7	33	0.00643544	0.153387	-1.26078	0.81421	0.0192831	0.451535	-1.05927	0.345308
Other pharmacogenomic interactions	1054	Palbociclib	CDK4, CDK6	PIK3R1_mut	OV	5	33	0.00697215	0.153387	-1.50563	0.81421	0.0445207	0.451535	-1.18156	0.345308
Other pharmacogenomic interactions	179	5-Fluorouracil	Antimetabolite (DNA & RNA)	SMAD4_mut	ESCA	4	35	0.00958751	0.1534	-1.26897	0.814174	0.0280631	0.224505	-1.06254	0.648774
Other pharmacogenomic interactions	52	GNF-2	BCR-ABL	MECOM_mut	SKCM	3	18	0.0170462	0.153416	-1.01028	0.81413	0.95946	0.95946	0.0785621	-0.0179733
Other pharmacogenomic interactions	306	Fedratinib	JAK2	gain:cnaGBM125 (AKAP9)	GBM	9	35	0.0605737	0.153764	-0.705708	0.813145	0.056631	0.143756	-0.73295	0.842375
Other pharmacogenomic interactions	127	GSK269962A	ROCK1, ROCK2	RNF43_mut	COREAD	4	15	0.00591775	0.153861	-2.57775	0.81287	0.161169	0.732277	-1.53595	0.135324
Other pharmacogenomic interactions	346	THZ-2-102-1	CDK7	gain:cnaOV95 (MECOM)	OV	9	32	0.0318163	0.154187	-0.867172	0.811953	0.1006	0.3235	-0.657147	0.490125
Other pharmacogenomic interactions	166	FTI-277	Farnesyl-transferase (FNTA)	ARID2_mut	COREAD	3	39	0.00881073	0.154577	-2.23389	0.810854	0.0749115	0.561837	-1.72665	0.25039
Other pharmacogenomic interactions	166	FTI-277	Farnesyl-transferase (FNTA)	SOS2_mut	COREAD	4	39	0.00987718	0.154577	-1.6843	0.810854	0.281587	0.812269	-0.909782	0.0903
Other pharmacogenomic interactions	1248	Daporinad	NAMPT	KRAS_mut	OV	7	32	0.011525	0.154727	-1.19418	0.810433	0.0108036	0.176034	-1.19547	0.754403
Other pharmacogenomic interactions	1239	YK-4-279	RNA helicase A	loss:cnaLUSC3	LUSC	5	12	0.0245031	0.154867	-1.28124	0.81004	0.0690695	0.204317	-0.954311	0.689695
Other pharmacogenomic interactions	1143	HG-5-88-01	EGFR, ADCK4	loss:cnaOV1	OV	3	22	0.0174482	0.154894	-1.74983	0.809965	0.0185728	0.615647	-1.65777	0.210668
Other pharmacogenomic interactions	1143	HG-5-88-01	EGFR, ADCK4	loss:cnaOV59	OV	4	22	0.00793774	0.154894	-1.74071	0.809965	0.139084	0.615647	-0.914836	0.210668
Other pharmacogenomic interactions	1143	HG-5-88-01	EGFR, ADCK4	loss:cnaOV64 (ARID1B,MAP3K4,MLLT4)	OV	6	22	0.0171482	0.154894	-1.09663	0.809965	0.0954706	0.615647	-0.681238	0.210668
Other pharmacogenomic interactions	1143	HG-5-88-01	EGFR, ADCK4	loss:cnaOV61	OV	3	22	0.0225887	0.154894	-1.67511	0.809965	0.386855	0.714193	-0.668132	0.146184
Other pharmacogenomic interactions	1143	HG-5-88-01	EGFR, ADCK4	loss:cnaOV62	OV	3	22	0.0225887	0.154894	-1.67511	0.809965	0.386855	0.714193	-0.668132	0.146184
Other pharmacogenomic interactions	1143	HG-5-88-01	EGFR, ADCK4	loss:cnaOV63	OV	3	22	0.0225887	0.154894	-1.67511	0.809965	0.386855	0.714193	-0.668132	0.146184
Other pharmacogenomic interactions	151	QS11	ARFGAP1	TP53_mut	BLCA	15	19	0.0258217	0.15493	-1.18999	0.809863	0.00971994	0.116639	-1.4632	0.933155
Other pharmacogenomic interactions	151	QS11	ARFGAP1	gain:cnaBLCA23 (MYC)	BLCA	4	19	0.0217086	0.15493	-0.902395	0.809863	0.0319976	0.191985	-0.894623	0.716732
Other pharmacogenomic interactions	309	Y-39983	ROCK	loss:cnaSTAD13	STAD	11	21	0.01409	0.15499	-1.28916	0.809697	0.0618868	0.680755	-1.00687	0.167009
Other pharmacogenomic interactions	170	Shikonin	not defined	ASH1L_mut	BRCA	3	47	0.00645853	0.155005	-1.71595	0.809655	0.000300537	0.0144258	-2.40461	1.84086
Other pharmacogenomic interactions	178	BAY-61-3606	SYK	loss:cnaLIHC10 (RB1)	LIHC	3	17	0.0516924	0.155077	-1.36967	0.809452	0.168753	0.453029	-0.913656	0.343874
Other pharmacogenomic interactions	1052	RO-3306	CDK1	gain:cnaCOREAD51 (MET)	COREAD	3	41	0.00248382	0.155224	-1.43078	0.809041	0.132376	0.868789	-0.3928	0.0610858
Other pharmacogenomic interactions	1052	RO-3306	CDK1	gain:cnaCOREAD35 (FLT3,WASF3)	COREAD	7	41	0.00403179	0.155224	-0.390641	0.809041	0.180043	0.868789	0.0563909	-0.0610858
Other pharmacogenomic interactions	106	XMD8-85	ERK5, BET	loss:cnaCOREAD19	COREAD	4	15	0.0119631	0.15552	-1.99204	0.808214	0.0239311	0.207403	-1.63355	0.683185
Other pharmacogenomic interactions	262	VX-11e	ERK2	TP53_mut	THCA	11	16	0.051916	0.155748	-0.980593	0.807577	0.0628621	0.0942931	-0.849203	1.02552
Other pharmacogenomic interactions	295	NVP-BHG712	EPHB4	gain:cnaGBM123 (EGFR)	GBM	10	35	0.00857103	0.155801	-1.03303	0.807431	0.166807	0.46456	-0.454152	0.332958
Other pharmacogenomic interactions	295	NVP-BHG712	EPHB4	NF1_mut	GBM	8	35	0.00944246	0.155801	-0.897163	0.807431	0.0380231	0.46456	-0.634323	0.332958
Other pharmacogenomic interactions	326	GSK690693	AKT1, AKT2, AKT3	loss:cnaLUAD16	LUAD	6	61	0.0037175	0.156135	-1.22535	0.8065	0.0121937	0.452441	-1.03246	0.344438
Other pharmacogenomic interactions	172	Embelin	XIAP	TP53_mut	THCA	11	16	0.0520482	0.156145	-0.728117	0.806473	0.072215	0.216645	-0.860258	0.664251
Other pharmacogenomic interactions	253	XMD14-99	ALK, CDK7, LTK, others	ARID1A_mut	DLBC	3	29	0.0195392	0.156314	-1.52054	0.806003	0.0368001	0.294401	-1.29692	0.531061
Other pharmacogenomic interactions	89	Parthenolide	HDAC1	TP53_mut	LGG	8	11	0.104389	0.156583	-1.23124	0.805254	0.12438	0.149256	-1.22274	0.826067
Other pharmacogenomic interactions	1242	(5Z)-7-Oxozeaenol	TAK1	loss:cnaSKCM4 (BNC2,CDKN2A,JAK2,PSIP1)	SKCM	37	51	0.0284763	0.15662	-0.756705	0.805154	0.0726756	0.399716	-0.654068	0.398248
Other pharmacogenomic interactions	272	AR-42	HDAC1	loss:cnaKIRC12	KIRC	11	30	0.0330276	0.156881	-0.728587	0.80443	0.025945	0.123239	-0.717521	0.909252
Other pharmacogenomic interactions	272	AR-42	HDAC1	loss:cnaKIRC13	KIRC	11	30	0.0330276	0.156881	-0.728587	0.80443	0.025945	0.123239	-0.717521	0.909252
Other pharmacogenomic interactions	272	AR-42	HDAC1	loss:cnaKIRC14	KIRC	11	30	0.0330276	0.156881	-0.728587	0.80443	0.025945	0.123239	-0.717521	0.909252
Other pharmacogenomic interactions	272	AR-42	HDAC1	loss:cnaKIRC15	KIRC	11	30	0.0330276	0.156881	-0.728587	0.80443	0.025945	0.123239	-0.717521	0.909252
Other pharmacogenomic interactions	1494	SN-38	TOP1	ZFHX3_mut	UCEC	4	9	0.0164384	0.157013	-0.029704	0.804064	0.0025064	0.0350896	-0.039602	1.45482
Other pharmacogenomic interactions	293	Amuvatinib	KIT, PDGFRA, FLT3	loss:cnaSTAD12	STAD	4	21	0.00714565	0.157204	-1.482	0.803536	0.028743	0.447433	-1.17022	0.349272
Other pharmacogenomic interactions	304	SB52334	ALK5	CDH1_mut	BRCA	4	49	0.00308446	0.157308	-1.34554	0.80325	0.0118451	0.201367	-1.05709	0.696012
Other pharmacogenomic interactions	1012	Vorinostat	HDAC inhibitor Class I, IIa, IIb, IV	KRAS_mut	OV	7	31	0.0572474	0.157333	-0.941867	0.803182	0.0343254	0.102976	-1.05756	0.987263
Other pharmacogenomic interactions	290	KIN001-260	IKKB	ARID1A_mut	PAAD	3	29	0.0349904	0.157457	-1.12913	0.802839	0.37252	0.598353	-0.397377	0.223043
Other pharmacogenomic interactions	1039	SL0101	RSK, AURKB, PIM1, PIM3	TP53_mut	LIHC	8	11	0.0790091	0.158018	-1.38391	0.801293	0.330395	0.330395	0.924759	-0.480967
Other pharmacogenomic interactions	1036	PLX-4720	BRAF	gain:cnaBLCA9	BLCA	3	15	0.0287486	0.158117	-1.54331	0.801021	0.102095	0.540536	-1.26395	0.267175
Other pharmacogenomic interactions	1036	PLX-4720	BRAF	ARID1A_mut	BLCA	5	15	0.0173115	0.158117	-1.09892	0.801021	0.375895	0.68914	-0.473368	0.161692
Other pharmacogenomic interactions	1005	Cisplatin	DNA crosslinker	loss:cnaCOREAD19	COREAD	16	43	0.00197665	0.158132	-1.15488	0.800981	0.0322892	0.831186	-0.893769	0.0803015
Other pharmacogenomic interactions	1036	PLX-4720	BRAF	loss:cnaLIHC7 (CDKN2A)	LIHC	4	14	0.0527268	0.15818	-1.17863	0.800848	0.0942243	0.282673	-0.814963	0.548716
Other pharmacogenomic interactions	186	Bexarotene	Retinioic X receptor (RXR) agonist	loss:cnaHNSC28 (ATP1A1,CSDE1,NRAS)	HNSC	4	42	0.00608861	0.158304	-1.66607	0.800509	0.0253119	0.344748	-1.32418	0.462498
Other pharmacogenomic interactions	223	ZSTK474	PI3K (class 1)	loss:cnaKIRC12	KIRC	12	31	0.0304635	0.158328	-0.343164	0.800443	0.0305463	0.128294	-0.41837	0.891793
Other pharmacogenomic interactions	223	ZSTK474	PI3K (class 1)	loss:cnaKIRC13	KIRC	12	31	0.0304635	0.158328	-0.343164	0.800443	0.0305463	0.128294	-0.41837	0.891793
Other pharmacogenomic interactions	223	ZSTK474	PI3K (class 1)	loss:cnaKIRC14	KIRC	12	31	0.0304635	0.158328	-0.343164	0.800443	0.0305463	0.128294	-0.41837	0.891793
Other pharmacogenomic interactions	223	ZSTK474	PI3K (class 1)	loss:cnaKIRC15	KIRC	12	31	0.0304635	0.158328	-0.343164	0.800443	0.0305463	0.128294	-0.41837	0.891793
Other pharmacogenomic interactions	136	Mitomycin-C	DNA crosslinker	EP300_mut	PAAD	3	30	0.0527864	0.158359	-1.09858	0.800357	0.0300427	0.176829	-1.2047	0.752446
Other pharmacogenomic interactions	136	Mitomycin-C	DNA crosslinker	gain:cnaPAAD3	PAAD	4	30	0.0359329	0.158359	-1.2312	0.800357	0.0449205	0.176829	-1.20078	0.752446
Other pharmacogenomic interactions	1494	SN-38	TOP1	gain:cnaPAAD2 (KRAS)	PAAD	10	29	0.0704112	0.158425	-0.687138	0.800176	0.110763	0.249217	-0.559851	0.603423
Other pharmacogenomic interactions	1375	Temozolomide	DNA alkylating agent	loss:cnaDLBC2	DLBC	3	30	0.0198068	0.158454	-1.54312	0.800096	0.00742837	0.0594269	-1.74499	1.22602
Other pharmacogenomic interactions	238	Idelalisib	PI3Kdelta	loss:cnaSTAD48 (FAT1,IRF2)	STAD	8	21	0.00754411	0.158458	-1.2759	0.800086	0.00399511	0.0878924	-1.31156	1.05605
Other pharmacogenomic interactions	238	Idelalisib	PI3Kdelta	loss:cnaSTAD12	STAD	4	21	0.0144053	0.158458	-1.51614	0.800086	0.0211029	0.19153	-1.3844	0.717764
Other pharmacogenomic interactions	1378	Bleomycin (50 uM)	dsDNA break induction	KRAS_mut	OV	7	32	0.0520748	0.158704	-0.978707	0.799412	0.0463612	0.156164	-0.972819	0.806419
Other pharmacogenomic interactions	328	SNX-2112	HSP90	gain:cnaESCA2 (KRAS)	ESCA	3	35	0.0198672	0.158938	-0.811323	0.798774	0.0810899	0.432479	-0.452831	0.364035
Other pharmacogenomic interactions	328	SNX-2112	HSP90	gain:cnaESCA3 (KRAS)	ESCA	3	35	0.0198672	0.158938	-0.811323	0.798774	0.0810899	0.432479	-0.452831	0.364035
Other pharmacogenomic interactions	275	I-BET-762	BRD2, BRD3, BRD4	loss:cnaESCA12	ESCA	8	35	0.0299012	0.159473	-1.59469	0.797313	0.237254	0.474509	-1.10853	0.323756
Other pharmacogenomic interactions	1021	Axitinib	PDGFR, KIT, VEGFR	loss:cnaPAAD4 (CDKN2A)	PAAD	16	25	0.0319291	0.159646	-0.80274	0.796843	0.0196049	0.0980246	-0.852146	1.00867
Other pharmacogenomic interactions	1259	Talazoparib	PARP1, PARP2	EP300_mut	BLCA	3	18	0.0145138	0.159652	-1.69757	0.796827	0.00847294	0.0932024	-1.80105	1.03057
Other pharmacogenomic interactions	1026	Tanespimycin	HSP90	KRAS_mut	LUAD	17	54	0.00445683	0.160446	-0.863936	0.794672	0.0052421	0.188715	-0.837814	0.724192
Other pharmacogenomic interactions	1239	YK-4-279	RNA helicase A	loss:cnaLUSC17 (FAT1,IRF2)	LUSC	4	12	0.0864684	0.160584	-1.25247	0.794297	0.0570569	0.204317	-1.38274	0.689695
Other pharmacogenomic interactions	230	GSK429286A	ROCK1, ROCK2	SMARCA4_mut	OV	3	32	0.0204024	0.160669	-1.34659	0.794067	0.0120974	0.664438	-1.65138	0.177546
Other pharmacogenomic interactions	230	GSK429286A	ROCK1, ROCK2	loss:cnaOV42	OV	4	32	0.0185873	0.160669	-1.40431	0.794067	0.346546	0.757381	-0.43825	0.120686
Other pharmacogenomic interactions	147	NSC-87877	SHP-1 (PTPN6), SHP-2 (PTPN11)	gain:cnaLUAD35 (MECOM)	LUAD	5	59	0.0114982	0.160975	-1.23917	0.793241	0.520769	0.965597	-0.330657	0.0152043
Other pharmacogenomic interactions	288	WHI-P97	JAK3	gain:cnaLUSC37	LUSC	3	14	0.0402658	0.161063	-1.43689	0.793003	0.0605792	0.192398	-1.37163	0.715799
Other pharmacogenomic interactions	288	WHI-P97	JAK3	gain:cnaLUSC6 (FGFR1,WHSC1L1)	LUSC	3	14	0.0402658	0.161063	-1.43689	0.793003	0.0605792	0.192398	-1.37163	0.715799
Other pharmacogenomic interactions	288	WHI-P97	JAK3	gain:cnaLUSC7 (MYC)	LUSC	3	14	0.0402658	0.161063	-1.43689	0.793003	0.0605792	0.192398	-1.37163	0.715799
Other pharmacogenomic interactions	203	BMS-345541	IKK1, IKK2	loss:cnaKIRC12	KIRC	12	31	0.0383544	0.161088	-0.255706	0.792936	0.0550769	0.204459	-0.073679	0.689393
Other pharmacogenomic interactions	203	BMS-345541	IKK1, IKK2	loss:cnaKIRC13	KIRC	12	31	0.0383544	0.161088	-0.255706	0.792936	0.0550769	0.204459	-0.073679	0.689393
Other pharmacogenomic interactions	203	BMS-345541	IKK1, IKK2	loss:cnaKIRC14	KIRC	12	31	0.0383544	0.161088	-0.255706	0.792936	0.0550769	0.204459	-0.073679	0.689393
Other pharmacogenomic interactions	203	BMS-345541	IKK1, IKK2	loss:cnaKIRC15	KIRC	12	31	0.0383544	0.161088	-0.255706	0.792936	0.0550769	0.204459	-0.073679	0.689393
Other pharmacogenomic interactions	203	BMS-345541	IKK1, IKK2	loss:cnaKIRC23	KIRC	4	31	0.0101895	0.161088	-0.846398	0.792936	0.058417	0.204459	-0.377876	0.689393
Other pharmacogenomic interactions	330	XMD13-2	RIPK1	loss:cnaESCA1	ESCA	6	35	0.0201406	0.161125	-1.73649	0.792837	0.112938	0.45175	-1.14705	0.345101
Other pharmacogenomic interactions	330	XMD13-2	RIPK1	NOTCH1_mut	ESCA	4	35	0.0155322	0.161125	-0.692663	0.792837	0.0901128	0.45175	-0.34517	0.345101
Other pharmacogenomic interactions	1030	KU-55933	ATM	PIK3R1_mut	UCEC	3	8	0.0161319	0.161319	-1.02714	0.792315	0.0387827	0.387827	-0.869416	0.411362
Other pharmacogenomic interactions	140	Vinorelbine	Microtubule destabiliser	loss:cnaBRCA18	BRCA	15	47	0.0168128	0.161403	-0.889339	0.792089	0.0530136	0.363522	-0.729669	0.439469
Other pharmacogenomic interactions	71	Pyrimethamine	Dihydrofolate reductase (DHFR)	gain:cnaLUAD30 (CCND1)	LUAD	4	13	0.0538469	0.161541	-1.78128	0.791718	0.130715	0.26143	-1.2764	0.582645
Other pharmacogenomic interactions	1018	Veliparib	PARP1, PARP2	BRAF_mut	THCA	5	13	0.161789	0.161789	-0.690666	0.79105	0.841815	0.841815	-0.201812	0.0747833
Other pharmacogenomic interactions	1018	Veliparib	PARP1, PARP2	TP53_mut	THCA	8	13	0.139518	0.161789	-0.185115	0.79105	0.629426	0.841815	0.0827067	-0.0747833
Other pharmacogenomic interactions	1047	Nutlin-3a (-)	MDM2	ARID1A_mut	STAD	4	23	0.0140765	0.16188	-1.04719	0.790806	0.0333773	0.255893	-0.992878	0.591942
Other pharmacogenomic interactions	298	OSI-930	KIT	gain:cnaBRCA27 (CLTC,PPM1D)	BRCA	9	48	0.00337936	0.162209	-1.07531	0.789925	0.0218577	0.755849	-0.600385	0.121565
Other pharmacogenomic interactions	59	WZ-1-84	BMX	MECOM_mut	SKCM	3	18	0.0180401	0.162361	-0.520422	0.789518	0.379355	0.426775	-0.0594921	0.369801
Other pharmacogenomic interactions	1527	Pictilisib	PI3K (class 1)	TP53_mut	GBM	20	34	0.0295291	0.16241	-0.892219	0.789387	0.00600178	0.163109	-1.15192	0.787523
Other pharmacogenomic interactions	1038	NU7441	DNAPK	ARID1B_mut	UCEC	3	8	0.0487324	0.162441	-1.4216	0.789304	0.849242	0.849242	0.800034	-0.0709685
Other pharmacogenomic interactions	253	XMD14-99	ALK, CDK7, LTK, others	loss:cnaOV41	OV	5	32	0.0283726	0.162498	-0.991355	0.789152	0.785653	0.969175	0.0330077	-0.0135979
Other pharmacogenomic interactions	1170	CCT-018159	HSP90	loss:cnaCOREAD12 (PCDH18)	COREAD	3	46	0.00195845	0.162551	-1.21304	0.789009	0.00290029	0.127774	-1.08069	0.893559
Other pharmacogenomic interactions	1013	Nilotinib	ABL	KRAS_mut	OV	4	21	0.00835825	0.162986	-1.42913	0.78785	0.0121423	0.473549	-1.67253	0.324635
Other pharmacogenomic interactions	254	Quizartinib	FLT3	gain:cnaGBM122	GBM	9	35	0.0696401	0.16322	-0.673478	0.787226	0.154445	0.231667	-0.484356	0.635135
Other pharmacogenomic interactions	254	Quizartinib	FLT3	gain:cnaGBM124	GBM	4	35	0.0774779	0.16322	-0.987691	0.787226	0.402612	0.492082	-0.46737	0.307963
Other pharmacogenomic interactions	1019	Bosutinib	SRC, ABL, TEC	gain:cnaCOREAD32 (STK4)	COREAD	7	43	0.0020404	0.163232	-1.14751	0.787196	0.0537959	0.537959	-0.49795	0.269251
Other pharmacogenomic interactions	286	KIN001-236	Angiopoietin-1 receptor	loss:cnaOV64 (ARID1B,MAP3K4,MLLT4)	OV	7	32	0.0103648	0.163246	-1.14844	0.787159	0.537607	0.970994	-0.272754	0.0127834
Other pharmacogenomic interactions	341	Selisistat	SIRT1	loss:cnaSKCM23	SKCM	4	52	0.0371292	0.163459	-1.19043	0.786592	0.183451	0.580768	-0.729629	0.235997
Other pharmacogenomic interactions	341	Selisistat	SIRT1	loss:cnaSKCM27 (CASP1)	SKCM	6	52	0.0408647	0.163459	-0.940516	0.786592	0.195034	0.580768	-0.624801	0.235997
Other pharmacogenomic interactions	329	QL-XI-92	DDR1	loss:cnaESCA1	ESCA	6	35	0.0114316	0.163574	-1.24549	0.786286	0.0368001	0.29512	-0.935991	0.530001
Other pharmacogenomic interactions	329	QL-XI-92	DDR1	loss:cnaESCA5 (PAX5)	ESCA	3	35	0.0204468	0.163574	-1.58384	0.786286	0.0430344	0.29512	-1.26917	0.530001
Other pharmacogenomic interactions	286	KIN001-236	Angiopoietin-1 receptor	loss:cnaOV33 (ZFHX3)	OV	4	32	0.0390035	0.163815	-1.15168	0.785647	0.600661	0.970994	-0.238497	0.0127834
Other pharmacogenomic interactions	286	KIN001-236	Angiopoietin-1 receptor	loss:cnaOV34	OV	5	32	0.0193398	0.163815	-1.11842	0.785647	0.261457	0.970994	-0.478105	0.0127834
Other pharmacogenomic interactions	286	KIN001-236	Angiopoietin-1 receptor	loss:cnaOV35	OV	5	32	0.0260146	0.163815	-1.05926	0.785647	0.435197	0.970994	-0.308984	0.0127834
Other pharmacogenomic interactions	286	KIN001-236	Angiopoietin-1 receptor	loss:cnaOV82	OV	3	32	0.038696	0.163815	-1.20701	0.785647	0.302052	0.970994	-0.55251	0.0127834
Other pharmacogenomic interactions	286	KIN001-236	Angiopoietin-1 receptor	loss:cnaOV59	OV	4	32	0.0371934	0.163815	-1.29758	0.785647	0.865677	0.970994	0.0833943	-0.0127834
Other pharmacogenomic interactions	286	KIN001-236	Angiopoietin-1 receptor	loss:cnaOV61	OV	3	32	0.0386916	0.163815	-1.40364	0.785647	0.970994	0.970994	0.0323833	-0.0127834
Other pharmacogenomic interactions	286	KIN001-236	Angiopoietin-1 receptor	loss:cnaOV62	OV	3	32	0.0386916	0.163815	-1.40364	0.785647	0.970994	0.970994	0.0323833	-0.0127834
Other pharmacogenomic interactions	286	KIN001-236	Angiopoietin-1 receptor	loss:cnaOV63	OV	3	32	0.0386916	0.163815	-1.40364	0.785647	0.970994	0.970994	0.0323833	-0.0127834
Other pharmacogenomic interactions	1262	UNC1215	L3MBTL3	gain:cnaLUAD21 (FOXA2)	LUAD	8	60	0.00781212	0.164055	-1.0086	0.785012	0.179517	0.874607	-0.615022	0.0581872
Other pharmacogenomic interactions	305	TPCA-1	IKK2	BRAF_mut	THCA	7	16	0.109625	0.164437	-1.10176	0.784	0.0418562	0.125569	-1.24447	0.901119
Other pharmacogenomic interactions	305	TPCA-1	IKK2	TP53_mut	THCA	11	16	0.0961449	0.164437	-0.720073	0.784	0.179324	0.268985	-0.780081	0.570271
Other pharmacogenomic interactions	164	JQ12	HDAC1, HDAC2	loss:cnaCOREAD11	COREAD	17	39	0.00658005	0.164501	-0.959248	0.783831	0.0115604	0.433517	-0.805176	0.362994
Other pharmacogenomic interactions	154	CHIR-99021	GSK3A, GSK3B	EP300_mut	STAD	3	21	0.0149599	0.164559	-1.9162	0.783679	0.230215	0.46043	-0.970813	0.336836
Other pharmacogenomic interactions	202	GSK1904529A	IGF1R, IR	SETD2_mut	KIRC	4	24	0.00867148	0.164758	-1.62525	0.783153	0.890765	0.890765	-0.0787272	0.0502368
Other pharmacogenomic interactions	230	GSK429286A	ROCK1, ROCK2	BRAF_mut	LUAD	3	61	0.0117689	0.164764	-1.3975	0.783138	0.401288	0.865961	-0.510613	0.0625017
Other pharmacogenomic interactions	288	WHI-P97	JAK3	loss:cnaGBM2 (CDKN2A)	GBM	26	35	0.0550914	0.165274	-0.818397	0.781795	0.214612	0.42214	-0.544293	0.374544
Other pharmacogenomic interactions	345	KIN001-270	CDK9	loss:cnaSTAD13	STAD	11	21	0.0101049	0.165444	-1.33255	0.781348	0.0431053	0.325631	-0.905401	0.487274
Other pharmacogenomic interactions	329	QL-XI-92	DDR1	loss:cnaKIRC22	KIRC	10	31	0.0551621	0.165486	-0.65766	0.781238	0.0479761	0.2015	-0.677417	0.695725
Other pharmacogenomic interactions	329	QL-XI-92	DDR1	loss:cnaKIRC23	KIRC	4	31	0.0484504	0.165486	-0.923192	0.781238	0.172178	0.40175	-0.570402	0.396044
Other pharmacogenomic interactions	147	NSC-87877	SHP-1 (PTPN6), SHP-2 (PTPN11)	gain:cnaLUAD22 (ASXL1)	LUAD	8	59	0.0181007	0.165568	-0.997912	0.781024	0.32996	0.965597	-0.206132	0.0152043
Other pharmacogenomic interactions	147	NSC-87877	SHP-1 (PTPN6), SHP-2 (PTPN11)	EGFR_mut	LUAD	5	59	0.0197104	0.165568	-1.1469	0.781024	0.973932	0.973932	-0.0533871	0.0114715
Other pharmacogenomic interactions	1166	QL-VIII-58	MTOR, ATR	PIK3CA_mut	HNSC	5	16	0.0138015	0.165618	-1.50514	0.780893	0.00867546	0.104106	-1.56983	0.982526
Other pharmacogenomic interactions	1	Erlotinib	EGFR	NF2_mut	KIRC	3	8	0.165937	0.165937	-0.630288	0.780058	0.126808	0.126808	-1.08016	0.896854
Other pharmacogenomic interactions	32	Tozasertib	AURKA, AURKB, AURKC, others	BPTF_mut	COREAD	3	15	0.0138281	0.165937	-0.155099	0.780056	0.00652177	0.0782613	0.200971	-1.10645
Other pharmacogenomic interactions	1143	HG-5-88-01	EGFR, ADCK4	loss:cnaOV27	OV	4	22	0.0463462	0.166263	-1.36268	0.779206	0.243694	0.615647	-0.863335	0.210668
Other pharmacogenomic interactions	1143	HG-5-88-01	EGFR, ADCK4	loss:cnaOV28	OV	4	22	0.0463462	0.166263	-1.36268	0.779206	0.243694	0.615647	-0.863335	0.210668
Other pharmacogenomic interactions	1143	HG-5-88-01	EGFR, ADCK4	loss:cnaOV29	OV	4	22	0.0463462	0.166263	-1.36268	0.779206	0.243694	0.615647	-0.863335	0.210668
Other pharmacogenomic interactions	1143	HG-5-88-01	EGFR, ADCK4	loss:cnaOV30	OV	4	22	0.0463462	0.166263	-1.36268	0.779206	0.243694	0.615647	-0.863335	0.210668
Other pharmacogenomic interactions	1143	HG-5-88-01	EGFR, ADCK4	loss:cnaOV83	OV	4	22	0.0379838	0.166263	-1.41841	0.779206	0.204823	0.615647	-0.922962	0.210668
Other pharmacogenomic interactions	1143	HG-5-88-01	EGFR, ADCK4	loss:cnaOV84	OV	5	22	0.0484932	0.166263	-1.27127	0.779206	0.1533	0.615647	-1.01066	0.210668
Other pharmacogenomic interactions	1143	HG-5-88-01	EGFR, ADCK4	loss:cnaOV85	OV	5	22	0.0484932	0.166263	-1.27127	0.779206	0.1533	0.615647	-1.01066	0.210668
Other pharmacogenomic interactions	238	Idelalisib	PI3Kdelta	loss:cnaSTAD11	STAD	3	21	0.0302373	0.166305	-1.70295	0.779094	0.0261177	0.19153	-1.70957	0.717764
Other pharmacogenomic interactions	238	Idelalisib	PI3Kdelta	gain:cnaSTAD45 (MET)	STAD	3	21	0.0292574	0.166305	-1.49437	0.779094	0.181124	0.471197	-0.851746	0.326797
Other pharmacogenomic interactions	1	Erlotinib	EGFR	BRAF_mut	COREAD	5	15	0.00827016	0.166338	-1.62044	0.779007	0.382554	0.885913	-0.387999	0.052609
Other pharmacogenomic interactions	1	Erlotinib	EGFR	loss:cnaCOREAD33	COREAD	5	15	0.0127953	0.166338	-1.66233	0.779007	0.0552666	0.885913	-1.06952	0.052609
Other pharmacogenomic interactions	298	OSI-930	KIT	gain:cnaBLCA23 (MYC)	BLCA	4	19	0.0138714	0.166457	-1.73175	0.778699	0.0593632	0.540091	-1.1838	0.267533
Other pharmacogenomic interactions	231	FMK	RSK	RNF43_mut	COREAD	9	39	0.0064134	0.166557	-0.790712	0.778438	0.392654	0.878696	-0.794063	0.0561614
Other pharmacogenomic interactions	1029	Motesanib	VEGFR, RET, KIT, PDGFR	loss:cnaGBM2 (CDKN2A)	GBM	24	33	0.0755506	0.167291	-0.64899	0.776529	0.520442	0.701465	-0.286048	0.153994
Other pharmacogenomic interactions	290	KIN001-260	IKKB	EGFR_mut	ESCA	3	35	0.0314552	0.167761	-1.16595	0.775309	0.0634329	0.932854	-1.04724	0.0301864
Other pharmacogenomic interactions	290	KIN001-260	IKKB	loss:cnaESCA1	ESCA	6	35	0.0135104	0.167761	-1.66303	0.775309	0.150616	0.932854	-0.999186	0.0301864
Other pharmacogenomic interactions	290	KIN001-260	IKKB	SMAD4_mut	ESCA	4	35	0.0289757	0.167761	-0.886731	0.775309	0.321285	0.932854	-0.394802	0.0301864
Other pharmacogenomic interactions	171	AKT inhibitor VIII	AKT1, AKT2, AKT3	PIK3CA_mut	ESCA	3	27	0.0120305	0.168427	-1.76055	0.773589	0.0571679	0.335505	-1.34003	0.474301
Other pharmacogenomic interactions	344	THZ-2-49	CDK9	ARID1A_mut	UCEC	3	9	0.0361278	0.168596	-1.28453	0.773151	0.0012072	0.0169008	-1.6377	1.77209
Other pharmacogenomic interactions	193	GW-2580	CSF1R	loss:cnaBRCA25 (ARID1B,MAP3K4,MLLT4)	BRCA	5	48	0.00351448	0.168695	-1.45586	0.772897	0.15819	0.843682	-0.471412	0.0738211
Other pharmacogenomic interactions	119	Lapatinib	ERBB2, EGFR	loss:cnaLGG1 (BNC2,CDKN2A,JAK2,PSIP1)	LGG	5	11	0.0562995	0.168898	-1.23777	0.772374	0.43756	0.933886	-0.596917	0.0297064
Other pharmacogenomic interactions	52	GNF-2	BCR-ABL	BRAF_mut	SKCM	12	18	0.056301	0.168903	-1.74914	0.772362	0.28612	0.502524	-0.965071	0.298843
Other pharmacogenomic interactions	229	Enzastaurin	PKCB	loss:cnaGBM100	GBM	3	35	0.0462225	0.169482	-1.28605	0.770875	0.0849379	0.280295	-1.14355	0.552385
Other pharmacogenomic interactions	229	Enzastaurin	PKCB	loss:cnaGBM102	GBM	3	35	0.0462225	0.169482	-1.28605	0.770875	0.0849379	0.280295	-1.14355	0.552385
Other pharmacogenomic interactions	229	Enzastaurin	PKCB	loss:cnaGBM103	GBM	3	35	0.0462225	0.169482	-1.28605	0.770875	0.0849379	0.280295	-1.14355	0.552385
Other pharmacogenomic interactions	229	Enzastaurin	PKCB	loss:cnaGBM104	GBM	3	35	0.0462225	0.169482	-1.28605	0.770875	0.0849379	0.280295	-1.14355	0.552385
Other pharmacogenomic interactions	229	Enzastaurin	PKCB	loss:cnaGBM105	GBM	3	35	0.0462225	0.169482	-1.28605	0.770875	0.0849379	0.280295	-1.14355	0.552385
Other pharmacogenomic interactions	229	Enzastaurin	PKCB	loss:cnaGBM106	GBM	3	35	0.0462225	0.169482	-1.28605	0.770875	0.0849379	0.280295	-1.14355	0.552385
Other pharmacogenomic interactions	229	Enzastaurin	PKCB	loss:cnaGBM97	GBM	3	35	0.0462225	0.169482	-1.28605	0.770875	0.0849379	0.280295	-1.14355	0.552385
Other pharmacogenomic interactions	229	Enzastaurin	PKCB	loss:cnaGBM98	GBM	3	35	0.0462225	0.169482	-1.28605	0.770875	0.0849379	0.280295	-1.14355	0.552385
Other pharmacogenomic interactions	229	Enzastaurin	PKCB	loss:cnaGBM99 (ANK3)	GBM	3	35	0.0462225	0.169482	-1.28605	0.770875	0.0849379	0.280295	-1.14355	0.552385
Other pharmacogenomic interactions	176	IPA-3	PAK1	PBRM1_mut	KIRC	3	23	0.0753608	0.169562	-1.12432	0.770672	0.153563	0.307126	-0.871795	0.512683
Other pharmacogenomic interactions	202	GSK1904529A	IGF1R, IR	loss:cnaLGG7 (RPL22)	LGG	3	16	0.0486218	0.170176	-1.56596	0.7691	0.530428	0.938915	-0.704489	0.0273737
Other pharmacogenomic interactions	202	GSK1904529A	IGF1R, IR	loss:cnaLGG14 (CUL2)	LGG	4	16	0.0296044	0.170176	-1.28393	0.7691	0.960629	0.972686	0.157187	-0.0120273
Other pharmacogenomic interactions	196	Phenformin	Biguanide agent	MLL3_mut	BRCA	3	48	0.00370119	0.170255	-0.252297	0.7689	0.00172499	0.0793498	-0.673332	1.10045
Other pharmacogenomic interactions	1529	Pevonedistat	NAE	loss:cnaLUSC4	LUSC	5	11	0.08513	0.17026	-1.17038	0.768887	0.149161	0.255705	-0.975644	0.59226
Other pharmacogenomic interactions	301	PHA-793887	CDK2, CDK7, CDK5	loss:cnaBLCA18 (CHD9,CNOT1,CYLD,MMP2,NUP93)	BLCA	3	19	0.0425924	0.17037	-1.47053	0.768607	0.0643799	0.19314	-1.34262	0.714128
Other pharmacogenomic interactions	273	CUDC-101	HDAC1-10, EGFR, ERBB2	loss:cnaKIRC7 (CDKN2A)	KIRC	25	30	0.0179806	0.170816	-1.2642	0.767471	0.0424759	0.269014	-1.09184	0.570225
Other pharmacogenomic interactions	295	NVP-BHG712	EPHB4	gain:cnaESCA2 (KRAS)	ESCA	3	35	0.0213863	0.17109	-1.02866	0.766775	0.061858	0.494864	-0.811818	0.305514
Other pharmacogenomic interactions	295	NVP-BHG712	EPHB4	gain:cnaESCA3 (KRAS)	ESCA	3	35	0.0213863	0.17109	-1.02866	0.766775	0.061858	0.494864	-0.811818	0.305514
Other pharmacogenomic interactions	231	FMK	RSK	loss:cnaBRCA25 (ARID1B,MAP3K4,MLLT4)	BRCA	6	49	0.00844916	0.17128	-1.15636	0.766292	0.0551923	0.938268	-0.733491	0.0276729
Other pharmacogenomic interactions	231	FMK	RSK	loss:cnaBRCA24	BRCA	3	49	0.0100753	0.17128	-1.61384	0.766292	0.501744	0.938542	-0.286407	0.0275465
Other pharmacogenomic interactions	1072	Avagacestat	Amyloid beta20, Amyloid beta40	gain:cnaOV51 (MYC)	OV	8	33	0.0237743	0.171362	-1.10349	0.766086	0.272146	0.431399	-0.465104	0.365121
Other pharmacogenomic interactions	1072	Avagacestat	Amyloid beta20, Amyloid beta40	gain:cnaOV94	OV	7	33	0.015198	0.171362	-1.2098	0.766086	0.790695	0.864476	-0.1253	0.0632473
Other pharmacogenomic interactions	1072	Avagacestat	Amyloid beta20, Amyloid beta40	gain:cnaOV95 (MECOM)	OV	8	33	0.0113068	0.171362	-1.13295	0.766086	0.855504	0.883104	-0.0770828	0.0539882
Other pharmacogenomic interactions	1072	Avagacestat	Amyloid beta20, Amyloid beta40	gain:cnaOV26	OV	3	33	0.017376	0.171362	-1.52369	0.766086	0.974335	0.989325	-0.035782	0.00466109
Other pharmacogenomic interactions	1072	Avagacestat	Amyloid beta20, Amyloid beta40	gain:cnaOV72 (ASXL1)	OV	5	33	0.017034	0.171362	-1.2152	0.766086	0.998474	0.998474	0.0110642	-0.000663099
Other pharmacogenomic interactions	1072	Avagacestat	Amyloid beta20, Amyloid beta40	gain:cnaOV18 (CCNE1)	OV	4	33	0.0148371	0.171362	-1.45626	0.766086	0.812586	0.865011	0.118362	-0.0629786
Other pharmacogenomic interactions	1072	Avagacestat	Amyloid beta20, Amyloid beta40	gain:cnaOV96	OV	4	33	0.0252043	0.171362	-1.4118	0.766086	0.478285	0.671634	0.384743	-0.172868
Other pharmacogenomic interactions	1526	Refametinib	MEK1, MEK2	STK11_mut	LUAD	11	60	0.0329777	0.171531	-0.853822	0.765658	0.0850202	0.324623	-0.684321	0.488621
Other pharmacogenomic interactions	1029	Motesanib	VEGFR, RET, KIT, PDGFR	PIK3R1_mut	UCEC	3	8	0.0171775	0.171775	-0.729822	0.765039	0.0236619	0.236619	-0.752833	0.625951
Other pharmacogenomic interactions	135	Gemcitabine	Pyrimidine antimetabolite	EP300_mut	PAAD	3	30	0.0573679	0.172104	-0.893285	0.76421	0.0312216	0.140497	-1.11831	0.852332
Other pharmacogenomic interactions	135	Gemcitabine	Pyrimidine antimetabolite	TP53_mut	PAAD	25	30	0.0567591	0.172104	-0.84791	0.76421	0.252386	0.567869	-0.497003	0.245752
Other pharmacogenomic interactions	154	CHIR-99021	GSK3A, GSK3B	gain:cnaGBM124	GBM	4	31	0.0071736	0.172166	-1.48827	0.764051	0.677925	0.81351	-0.250083	0.089637
Other pharmacogenomic interactions	312	Tivozanib	VEGFR1, VEGFR2, VEGFR3	loss:cnaBLCA5 (FAT1,IRF2)	BLCA	5	19	0.0430535	0.172214	-1.1512	0.763932	0.307418	0.527002	-0.546245	0.278188
Other pharmacogenomic interactions	312	Tivozanib	VEGFR1, VEGFR2, VEGFR3	EP300_mut	BLCA	4	19	0.0200428	0.172214	-1.49862	0.763932	0.384874	0.577312	-0.531582	0.23859
Other pharmacogenomic interactions	1038	NU7441	DNAPK	RNF43_mut	PAAD	3	22	0.0287165	0.172299	-1.29463	0.763717	0.755018	0.909575	0.27792	-0.0411615
Other pharmacogenomic interactions	1378	Bleomycin (50 uM)	dsDNA break induction	NF2_mut	KIRC	6	31	0.0949553	0.172646	-0.811728	0.762844	0.0501502	0.0936104	-0.897598	1.02868
Other pharmacogenomic interactions	292	Masitinib	KIT, PDGFRA, PDGFRB	loss:cnaKIRC24 (FAT1,IRF2)	KIRC	8	31	0.065818	0.172772	-0.759949	0.762526	0.129406	0.315545	-0.590278	0.500939
Other pharmacogenomic interactions	1375	Temozolomide	DNA alkylating agent	EP300_mut	BLCA	3	18	0.0157557	0.173312	-1.79812	0.76117	0.178363	0.999728	-0.833753	0.000118346
Other pharmacogenomic interactions	222	BX-912	PDK1 (PDPK1)	loss:cnaGBM47	GBM	6	35	0.057802	0.173406	-0.883832	0.760936	0.00711247	0.0234712	-1.29832	1.62947
Other pharmacogenomic interactions	165	DMOG	HIF-PH	loss:cnaLUSC17 (FAT1,IRF2)	LUSC	6	14	0.0108381	0.17341	-1.18738	0.760926	0.0759348	0.398536	-0.79502	0.399532
Other pharmacogenomic interactions	223	ZSTK474	PI3K (class 1)	loss:cnaSTAD12	STAD	4	21	0.0158004	0.173804	-1.57092	0.75994	0.022247	0.244717	-1.48315	0.611335
Other pharmacogenomic interactions	328	SNX-2112	HSP90	gain:cnaCOREAD47 (MYC)	COREAD	6	46	0.00395081	0.173836	-1.02804	0.759861	0.0049567	0.268321	-1.05448	0.571346
Other pharmacogenomic interactions	197	Bryostatin 1	PKC	gain:cnaBRCA47 (EGFR)	BRCA	7	48	0.00682255	0.173975	-1.21321	0.759513	0.0331993	0.947863	-0.932169	0.0232544
Other pharmacogenomic interactions	197	Bryostatin 1	PKC	loss:cnaBRCA17	BRCA	11	48	0.00419723	0.173975	-0.922328	0.759513	0.829579	0.947863	-0.0381386	0.0232544
Other pharmacogenomic interactions	1372	Trametinib	MEK1, MEK2	loss:cnaGBM1	GBM	3	34	0.0388251	0.174067	-1.16829	0.759283	0.0145284	0.159812	-1.41215	0.796391
Other pharmacogenomic interactions	1372	Trametinib	MEK1, MEK2	loss:cnaGBM100	GBM	3	34	0.0791215	0.174067	-0.982948	0.759283	0.124049	0.269909	-0.872598	0.568783
Other pharmacogenomic interactions	1372	Trametinib	MEK1, MEK2	loss:cnaGBM102	GBM	3	34	0.0791215	0.174067	-0.982948	0.759283	0.124049	0.269909	-0.872598	0.568783
Other pharmacogenomic interactions	1372	Trametinib	MEK1, MEK2	loss:cnaGBM103	GBM	3	34	0.0791215	0.174067	-0.982948	0.759283	0.124049	0.269909	-0.872598	0.568783
Other pharmacogenomic interactions	1372	Trametinib	MEK1, MEK2	loss:cnaGBM104	GBM	3	34	0.0791215	0.174067	-0.982948	0.759283	0.124049	0.269909	-0.872598	0.568783
Other pharmacogenomic interactions	1372	Trametinib	MEK1, MEK2	loss:cnaGBM105	GBM	3	34	0.0791215	0.174067	-0.982948	0.759283	0.124049	0.269909	-0.872598	0.568783
Other pharmacogenomic interactions	1372	Trametinib	MEK1, MEK2	loss:cnaGBM106	GBM	3	34	0.0791215	0.174067	-0.982948	0.759283	0.124049	0.269909	-0.872598	0.568783
Other pharmacogenomic interactions	1372	Trametinib	MEK1, MEK2	loss:cnaGBM45	GBM	3	34	0.048035	0.174067	-1.11482	0.759283	0.0532988	0.269909	-1.10433	0.568783
Other pharmacogenomic interactions	1372	Trametinib	MEK1, MEK2	loss:cnaGBM47	GBM	6	34	0.0419625	0.174067	-0.640862	0.759283	0.130865	0.269909	-0.482308	0.568783
Other pharmacogenomic interactions	1372	Trametinib	MEK1, MEK2	loss:cnaGBM97	GBM	3	34	0.0791215	0.174067	-0.982948	0.759283	0.124049	0.269909	-0.872598	0.568783
Other pharmacogenomic interactions	1372	Trametinib	MEK1, MEK2	loss:cnaGBM98	GBM	3	34	0.0791215	0.174067	-0.982948	0.759283	0.124049	0.269909	-0.872598	0.568783
Other pharmacogenomic interactions	1372	Trametinib	MEK1, MEK2	loss:cnaGBM99 (ANK3)	GBM	3	34	0.0791215	0.174067	-0.982948	0.759283	0.124049	0.269909	-0.872598	0.568783
Other pharmacogenomic interactions	1529	Pevonedistat	NAE	loss:cnaGBM2 (CDKN2A)	GBM	18	24	0.0483862	0.17419	-0.955566	0.758976	0.153064	0.393594	-0.748478	0.404951
Other pharmacogenomic interactions	301	PHA-793887	CDK2, CDK7, CDK5	gain:cnaESCA2 (KRAS)	ESCA	3	35	0.0276984	0.17425	-0.723739	0.758826	0.0664124	0.21252	-0.576951	0.672601
Other pharmacogenomic interactions	301	PHA-793887	CDK2, CDK7, CDK5	gain:cnaESCA3 (KRAS)	ESCA	3	35	0.0276984	0.17425	-0.723739	0.758826	0.0664124	0.21252	-0.576951	0.672601
Other pharmacogenomic interactions	301	PHA-793887	CDK2, CDK7, CDK5	loss:cnaESCA1	ESCA	6	35	0.032672	0.17425	-1.38447	0.758826	0.0277759	0.21252	-1.36724	0.672601
Other pharmacogenomic interactions	177	GSK650394	SGK2, SGK3	loss:cnaLIHC10 (RB1)	LIHC	3	17	0.116306	0.174458	-0.993184	0.758308	0.0777712	0.233314	-1.16271	0.63206
Other pharmacogenomic interactions	1015	CI-1040	MEK1, MEK2	loss:cnaLUSC3	LUSC	6	13	0.0581673	0.174502	-1.10912	0.7582	0.0299254	0.119701	-1.41458	0.921901
Other pharmacogenomic interactions	1268	XAV939	TNKS1, TNKS2	gain:cnaLUSC41 (AKAP9)	LUSC	4	15	0.0290964	0.174578	-0.741432	0.75801	0.00681453	0.122662	-0.9934	0.911291
Other pharmacogenomic interactions	1268	XAV939	TNKS1, TNKS2	loss:cnaLUSC3	LUSC	7	15	0.0246109	0.174578	-1.21735	0.75801	0.584599	0.760638	-0.469089	0.118822
Other pharmacogenomic interactions	1005	Cisplatin	DNA crosslinker	loss:cnaDLBC4 (CDKN2A)	DLBC	8	30	0.0436449	0.17458	-1.13184	0.758006	0.132066	0.352176	-0.955336	0.45324
Other pharmacogenomic interactions	309	Y-39983	ROCK	loss:cnaKIRC23	KIRC	4	31	0.0648149	0.174591	-0.72437	0.757978	0.0795945	0.220739	-0.739061	0.656121
Other pharmacogenomic interactions	309	Y-39983	ROCK	loss:cnaKIRC24 (FAT1,IRF2)	KIRC	8	31	0.0831386	0.174591	-0.682663	0.757978	0.166471	0.388221	-0.563893	0.410921
Other pharmacogenomic interactions	309	Y-39983	ROCK	loss:cnaKIRC7 (CDKN2A)	KIRC	26	31	0.0736061	0.174591	-0.773092	0.757978	0.184867	0.388221	-0.553619	0.410921
Other pharmacogenomic interactions	309	Y-39983	ROCK	loss:cnaKIRC16	KIRC	6	31	0.0785847	0.174591	-0.691006	0.757978	0.317622	0.600031	-0.38435	0.221826
Other pharmacogenomic interactions	147	NSC-87877	SHP-1 (PTPN6), SHP-2 (PTPN11)	gain:cnaLUAD13 (MET)	LUAD	6	59	0.0249431	0.174601	-0.996273	0.757952	0.14945	0.896698	-0.650013	0.0473537
Other pharmacogenomic interactions	283	Omipalisib	PI3K (class 1), MTORC1, MTORC2	TP53_mut	BLCA	15	19	0.0729585	0.1751	-1.00272	0.756713	0.0786835	0.239488	-1.01865	0.620717
Other pharmacogenomic interactions	283	Omipalisib	PI3K (class 1), MTORC1, MTORC2	gain:cnaBLCA23 (MYC)	BLCA	4	19	0.0620095	0.1751	-0.814548	0.756713	0.184177	0.361211	-0.59131	0.442239
Other pharmacogenomic interactions	1498	Selumetinib	MEK1, MEK2	BRAF_mut	THCA	7	15	0.0584534	0.17536	-1.1913	0.756069	0.067978	0.203934	-1.11959	0.69051
Other pharmacogenomic interactions	1219	PFI-1	BRD4	gain:cnaLGG16 (EGFR)	LGG	5	17	0.0250672	0.175471	-1.37594	0.755796	0.0312006	0.218404	-1.30957	0.660739
Other pharmacogenomic interactions	178	BAY-61-3606	SYK	loss:cnaKIRC12	KIRC	6	23	0.0487834	0.17562	-0.266612	0.755425	0.0393768	0.141757	-0.200529	0.848457
Other pharmacogenomic interactions	178	BAY-61-3606	SYK	loss:cnaKIRC13	KIRC	6	23	0.0487834	0.17562	-0.266612	0.755425	0.0393768	0.141757	-0.200529	0.848457
Other pharmacogenomic interactions	178	BAY-61-3606	SYK	loss:cnaKIRC14	KIRC	6	23	0.0487834	0.17562	-0.266612	0.755425	0.0393768	0.141757	-0.200529	0.848457
Other pharmacogenomic interactions	178	BAY-61-3606	SYK	loss:cnaKIRC15	KIRC	6	23	0.0487834	0.17562	-0.266612	0.755425	0.0393768	0.141757	-0.200529	0.848457
Other pharmacogenomic interactions	254	Quizartinib	FLT3	loss:cnaGBM93	GBM	6	35	0.104806	0.175768	-0.732282	0.75506	0.0561055	0.123432	-0.855469	0.908572
Other pharmacogenomic interactions	254	Quizartinib	FLT3	loss:cnaGBM94	GBM	6	35	0.104806	0.175768	-0.732282	0.75506	0.0561055	0.123432	-0.855469	0.908572
Other pharmacogenomic interactions	254	Quizartinib	FLT3	loss:cnaGBM95	GBM	6	35	0.104806	0.175768	-0.732282	0.75506	0.0561055	0.123432	-0.855469	0.908572
Other pharmacogenomic interactions	254	Quizartinib	FLT3	loss:cnaGBM133	GBM	3	35	0.106526	0.175768	-1.08534	0.75506	0.400272	0.492082	-0.716191	0.307963
Other pharmacogenomic interactions	62	BMS-536924	IGF1R, IR	NOTCH1_mut	ESCA	3	11	0.11749	0.176235	-1.3865	0.753908	0.060007	0.0900105	-1.69453	1.04571
Other pharmacogenomic interactions	203	BMS-345541	IKK1, IKK2	loss:cnaSTAD48 (FAT1,IRF2)	STAD	8	21	0.00803327	0.176732	-1.40345	0.752685	0.00268301	0.0207305	-1.63297	1.68339
Other pharmacogenomic interactions	332	XMD15-27	CAMK2	gain:cnaOV96	OV	5	32	0.00843238	0.17708	-1.36144	0.75183	0.945441	0.96069	0.25893	-0.0174167
Other pharmacogenomic interactions	332	XMD15-27	CAMK2	gain:cnaOV19	OV	3	32	0.00652339	0.17708	-1.75418	0.75183	0.451053	0.631474	0.620334	-0.199644
Other pharmacogenomic interactions	1021	Axitinib	PDGFR, KIT, VEGFR	NFE2L2_mut	ESCA	3	31	0.0236157	0.177118	-1.61715	0.751737	0.300912	0.770321	-0.807721	0.113328
Other pharmacogenomic interactions	1005	Cisplatin	DNA crosslinker	gain:cnaBRCA48	BRCA	5	45	0.0113235	0.177401	-1.32045	0.751043	0.0353371	0.438177	-1.0813	0.358351
Other pharmacogenomic interactions	1023	GW441756	NTRK1	MLL3_mut	BRCA	3	45	0.0037803	0.177674	-1.14349	0.750376	0.601934	0.854116	0.177752	-0.0684829
Other pharmacogenomic interactions	200	Dacinostat	HDAC1	loss:cnaCOREAD11	COREAD	17	38	0.0144415	0.178112	-0.924081	0.749307	0.00460019	0.159471	-1.05782	0.797318
Other pharmacogenomic interactions	1248	Daporinad	NAMPT	BRAF_mut	THCA	7	16	0.118865	0.178298	-1.01764	0.748854	0.297965	0.446947	-0.778576	0.349744
Other pharmacogenomic interactions	249	Cabozantinib	VEGFR, MET, RET, KIT, FLT1, FLT3, FLT4, TIE2,AXL	loss:cnaGBM100	GBM	3	35	0.0655769	0.178312	-1.09614	0.748819	0.0304722	0.100558	-1.33581	0.997582
Other pharmacogenomic interactions	249	Cabozantinib	VEGFR, MET, RET, KIT, FLT1, FLT3, FLT4, TIE2,AXL	loss:cnaGBM102	GBM	3	35	0.0655769	0.178312	-1.09614	0.748819	0.0304722	0.100558	-1.33581	0.997582
Other pharmacogenomic interactions	249	Cabozantinib	VEGFR, MET, RET, KIT, FLT1, FLT3, FLT4, TIE2,AXL	loss:cnaGBM103	GBM	3	35	0.0655769	0.178312	-1.09614	0.748819	0.0304722	0.100558	-1.33581	0.997582
Other pharmacogenomic interactions	249	Cabozantinib	VEGFR, MET, RET, KIT, FLT1, FLT3, FLT4, TIE2,AXL	loss:cnaGBM104	GBM	3	35	0.0655769	0.178312	-1.09614	0.748819	0.0304722	0.100558	-1.33581	0.997582
Other pharmacogenomic interactions	249	Cabozantinib	VEGFR, MET, RET, KIT, FLT1, FLT3, FLT4, TIE2,AXL	loss:cnaGBM105	GBM	3	35	0.0655769	0.178312	-1.09614	0.748819	0.0304722	0.100558	-1.33581	0.997582
Other pharmacogenomic interactions	249	Cabozantinib	VEGFR, MET, RET, KIT, FLT1, FLT3, FLT4, TIE2,AXL	loss:cnaGBM106	GBM	3	35	0.0655769	0.178312	-1.09614	0.748819	0.0304722	0.100558	-1.33581	0.997582
Other pharmacogenomic interactions	249	Cabozantinib	VEGFR, MET, RET, KIT, FLT1, FLT3, FLT4, TIE2,AXL	loss:cnaGBM47	GBM	6	35	0.0353858	0.178312	-0.831041	0.748819	0.0229069	0.100558	-0.911066	0.997582
Other pharmacogenomic interactions	249	Cabozantinib	VEGFR, MET, RET, KIT, FLT1, FLT3, FLT4, TIE2,AXL	loss:cnaGBM97	GBM	3	35	0.0655769	0.178312	-1.09614	0.748819	0.0304722	0.100558	-1.33581	0.997582
Other pharmacogenomic interactions	249	Cabozantinib	VEGFR, MET, RET, KIT, FLT1, FLT3, FLT4, TIE2,AXL	loss:cnaGBM98	GBM	3	35	0.0655769	0.178312	-1.09614	0.748819	0.0304722	0.100558	-1.33581	0.997582
Other pharmacogenomic interactions	249	Cabozantinib	VEGFR, MET, RET, KIT, FLT1, FLT3, FLT4, TIE2,AXL	loss:cnaGBM99 (ANK3)	GBM	3	35	0.0655769	0.178312	-1.09614	0.748819	0.0304722	0.100558	-1.33581	0.997582
Other pharmacogenomic interactions	249	Cabozantinib	VEGFR, MET, RET, KIT, FLT1, FLT3, FLT4, TIE2,AXL	loss:cnaGBM2 (CDKN2A)	GBM	26	35	0.0650685	0.178312	-0.795679	0.748819	0.0433217	0.11281	-0.858036	0.947651
Other pharmacogenomic interactions	249	Cabozantinib	VEGFR, MET, RET, KIT, FLT1, FLT3, FLT4, TIE2,AXL	NF1_mut	GBM	8	35	0.0205247	0.178312	-0.92809	0.748819	0.0441752	0.11281	-0.862393	0.947651
Other pharmacogenomic interactions	204	Tipifarnib	Farnesyl-transferase (FNTA)	loss:cnaDLBC2	DLBC	4	29	0.0223052	0.178441	-1.26555	0.748505	0.0104984	0.083987	-1.47223	1.07579
Other pharmacogenomic interactions	178	BAY-61-3606	SYK	gain:cnaLGG16 (EGFR)	LGG	4	15	0.0255256	0.178679	-1.56145	0.747926	0.0529964	0.185487	-1.20804	0.731686
Other pharmacogenomic interactions	111	Salubrinal	EIF2A	SACS_mut	COREAD	3	15	0.0137461	0.1787	-2.25843	0.747876	0.0313367	0.318626	-1.84277	0.496719
Other pharmacogenomic interactions	221	TAK-715	p38alpha, p38beta	loss:cnaLUAD6 (SMARCA4)	LUAD	5	61	0.0127673	0.178742	-1.13137	0.747774	0.0211079	0.443265	-1.17133	0.353337
Other pharmacogenomic interactions	266	Zibotentan	Endothelin-1 receptor (EDNRA)	TP53_mut	HNSC	36	40	0.0214491	0.178742	-1.31811	0.747773	0.191987	0.799944	-0.803299	0.0969403
Other pharmacogenomic interactions	266	Zibotentan	Endothelin-1 receptor (EDNRA)	loss:cnaHNSC32 (FAT1)	HNSC	13	40	0.0207784	0.178742	-0.776653	0.747773	0.420099	0.805604	-0.213675	0.0938786
Other pharmacogenomic interactions	1239	YK-4-279	RNA helicase A	gain:cnaLGG16 (EGFR)	LGG	4	15	0.0255813	0.179069	-1.51713	0.746979	0.000292616	0.00204831	-2.62116	2.6886
Other pharmacogenomic interactions	1049	PD173074	FGFR1, FGFR3	MLL2_mut	BLCA	3	15	0.0162796	0.179075	-1.33524	0.746964	0.426921	0.808105	-0.45838	0.0925323
Other pharmacogenomic interactions	1029	Motesanib	VEGFR, RET, KIT, PDGFR	loss:cnaESCA14	ESCA	8	31	0.0119385	0.179077	-1.05653	0.74696	0.766909	0.834597	0.0862334	-0.078523
Other pharmacogenomic interactions	275	I-BET-762	BRD2, BRD3, BRD4	BRAF_mut	THCA	7	16	0.0979591	0.179092	-0.747908	0.746924	0.166131	0.258995	-0.792325	0.586709
Other pharmacogenomic interactions	275	I-BET-762	BRD2, BRD3, BRD4	TP53_mut	THCA	11	16	0.119394	0.179092	-0.886582	0.746924	0.172663	0.258995	-0.764706	0.586709
Other pharmacogenomic interactions	310	YM201636	PYKFYVE	MLL2_mut	DLBC	9	29	0.0224482	0.179585	-0.826071	0.745729	0.0695578	0.450092	-0.652353	0.346699
Other pharmacogenomic interactions	178	BAY-61-3606	SYK	loss:cnaKIRC16	KIRC	3	23	0.0598705	0.179611	-0.789568	0.745666	0.131303	0.335501	-0.528743	0.474306
Other pharmacogenomic interactions	1230	IOX2	EGLN1	TP53BP1_mut	COREAD	3	49	0.00399524	0.179786	-1.85125	0.745245	0.248743	0.794474	-0.877115	0.0999201
Other pharmacogenomic interactions	1230	IOX2	EGLN1	loss:cnaCOREAD21	COREAD	3	49	0.00382158	0.179786	-1.9301	0.745245	0.477055	0.905604	-0.592986	0.0430616
Other pharmacogenomic interactions	302	PI-103	PI3Kalpha, DAPK3, CLK4, PIM3, HIPK2	loss:cnaSTAD12	STAD	4	21	0.0172862	0.17991	-1.62204	0.744945	0.0113845	0.0963619	-1.7214	1.01609
Other pharmacogenomic interactions	302	PI-103	PI3Kalpha, DAPK3, CLK4, PIM3, HIPK2	loss:cnaSTAD48 (FAT1,IRF2)	STAD	8	21	0.0245331	0.17991	-1.11115	0.744945	0.0131403	0.0963619	-1.30751	1.01609
Other pharmacogenomic interactions	282	Pelitinib	EGFR	loss:cnaGBM100	GBM	3	35	0.0600936	0.180281	-1.21817	0.744051	0.147886	0.325349	-0.892938	0.487651
Other pharmacogenomic interactions	282	Pelitinib	EGFR	loss:cnaGBM102	GBM	3	35	0.0600936	0.180281	-1.21817	0.744051	0.147886	0.325349	-0.892938	0.487651
Other pharmacogenomic interactions	282	Pelitinib	EGFR	loss:cnaGBM103	GBM	3	35	0.0600936	0.180281	-1.21817	0.744051	0.147886	0.325349	-0.892938	0.487651
Other pharmacogenomic interactions	282	Pelitinib	EGFR	loss:cnaGBM104	GBM	3	35	0.0600936	0.180281	-1.21817	0.744051	0.147886	0.325349	-0.892938	0.487651
Other pharmacogenomic interactions	282	Pelitinib	EGFR	loss:cnaGBM105	GBM	3	35	0.0600936	0.180281	-1.21817	0.744051	0.147886	0.325349	-0.892938	0.487651
Other pharmacogenomic interactions	282	Pelitinib	EGFR	loss:cnaGBM106	GBM	3	35	0.0600936	0.180281	-1.21817	0.744051	0.147886	0.325349	-0.892938	0.487651
Other pharmacogenomic interactions	282	Pelitinib	EGFR	loss:cnaGBM134	GBM	3	35	0.0237607	0.180281	-1.47687	0.744051	0.0436892	0.325349	-1.26126	0.487651
Other pharmacogenomic interactions	282	Pelitinib	EGFR	loss:cnaGBM135	GBM	3	35	0.0237607	0.180281	-1.47687	0.744051	0.0436892	0.325349	-1.26126	0.487651
Other pharmacogenomic interactions	282	Pelitinib	EGFR	loss:cnaGBM97	GBM	3	35	0.0600936	0.180281	-1.21817	0.744051	0.147886	0.325349	-0.892938	0.487651
Other pharmacogenomic interactions	282	Pelitinib	EGFR	loss:cnaGBM98	GBM	3	35	0.0600936	0.180281	-1.21817	0.744051	0.147886	0.325349	-0.892938	0.487651
Other pharmacogenomic interactions	282	Pelitinib	EGFR	loss:cnaGBM99 (ANK3)	GBM	3	35	0.0600936	0.180281	-1.21817	0.744051	0.147886	0.325349	-0.892938	0.487651
Other pharmacogenomic interactions	179	5-Fluorouracil	Antimetabolite (DNA & RNA)	BRAF_mut	THCA	6	15	0.0602612	0.180784	-1.18554	0.742841	0.109366	0.328099	-1.01414	0.483995
Other pharmacogenomic interactions	54	CGP-082996	CDK4	TP53_mut	LGG	8	11	0.0772295	0.18094	-1.33182	0.742467	0.00805738	0.0483443	-2.58779	1.31565
Other pharmacogenomic interactions	110	Seliciclib	CDK2, CDK7, CDK9	gain:cnaBRCA14 (RAD21)	BRCA	6	13	0.0319324	0.18095	-1.32548	0.742441	0.126482	0.42897	-1.15184	0.367573
Other pharmacogenomic interactions	1029	Motesanib	VEGFR, RET, KIT, PDGFR	EP300_mut	ESCA	3	31	0.0241397	0.181048	-1.18292	0.742206	0.597084	0.834597	0.0705278	-0.078523
Other pharmacogenomic interactions	1010	Gefitinib	EGFR	gain:cnaLUAD11 (EGFR)	LUAD	8	53	0.0097938	0.181185	-1.05963	0.741877	0.0123543	0.228554	-0.990253	0.641011
Other pharmacogenomic interactions	1199	Tamoxifen	ESR1	ASXL1_mut	LAML	5	26	0.0753677	0.181312	-0.985189	0.741573	0.613423	0.944628	-0.269717	0.0247394
Other pharmacogenomic interactions	1199	Tamoxifen	ESR1	TP53_mut	LAML	14	26	0.0906561	0.181312	-0.831276	0.741573	0.873608	0.945123	-0.0887258	0.0245117
Other pharmacogenomic interactions	1047	Nutlin-3a (-)	MDM2	gain:cnaHNSC8	HNSC	3	35	0.00756198	0.181487	-1.86192	0.741153	0.817184	0.994837	0.0328221	-0.00224829
Other pharmacogenomic interactions	178	BAY-61-3606	SYK	NF2_mut	KIRC	5	23	0.0706408	0.181648	-0.798764	0.74077	0.149112	0.335501	-0.642057	0.474306
Other pharmacogenomic interactions	1037	BX796	TBK1, PDK1 (PDPK1), IKK, AURKB, AURKC	loss:cnaLUSC17 (FAT1,IRF2)	LUSC	6	13	0.0217933	0.181936	-1.08239	0.740082	0.0686154	0.377385	-0.948165	0.423216
Other pharmacogenomic interactions	177	GSK650394	SGK2, SGK3	LARP4B_mut	UCEC	3	9	0.0390098	0.182046	-2.70373	0.739819	0.0301235	0.42173	-2.2784	0.374966
Other pharmacogenomic interactions	1218	JQ1	BRD2, BRD3, BRD4, BRDT	loss:cnaLUAD29 (TFDP1)	LUAD	10	61	0.0131671	0.182261	-0.895819	0.739307	0.139287	0.843521	-0.502824	0.0739041
Other pharmacogenomic interactions	1218	JQ1	BRD2, BRD3, BRD4, BRDT	SMARCA4_mut	LUAD	13	61	0.0173582	0.182261	-0.787498	0.739307	0.26417	0.843521	-0.318006	0.0739041
Other pharmacogenomic interactions	1129	PF-4708671	S6K1	NF1_mut	LUAD	3	61	0.00456583	0.182633	-1.87813	0.73842	0.353143	0.840852	-0.743423	0.0752806
Other pharmacogenomic interactions	206	Ruxolitinib	JAK1, JAK2	loss:cnaBRCA23	BRCA	3	49	0.00358254	0.18271	-1.67276	0.738239	0.0937193	0.425811	-0.856224	0.370783
Other pharmacogenomic interactions	1066	AZD6482	PI3Kbeta	CREBBP_mut	DLBC	6	28	0.0457459	0.182984	-0.937636	0.737588	0.0684333	0.195084	-0.893014	0.709778
Other pharmacogenomic interactions	1066	AZD6482	PI3Kbeta	EP300_mut	DLBC	6	28	0.040392	0.182984	-1.04304	0.737588	0.0731566	0.195084	-0.837777	0.709778
Other pharmacogenomic interactions	186	Bexarotene	Retinioic X receptor (RXR) agonist	gain:cnaPAAD2 (KRAS)	PAAD	10	29	0.0813137	0.183007	-0.336214	0.737532	0.118754	0.327284	-0.449477	0.485076
Other pharmacogenomic interactions	52	GNF-2	BCR-ABL	NF1_mut	GBM	4	12	0.110177	0.183189	-1.27174	0.7371	0.73777	0.893891	0.218662	-0.0487156
Other pharmacogenomic interactions	304	SB52334	ALK5	loss:cnaKIRC23	KIRC	4	31	0.0523623	0.183268	-0.931264	0.736913	0.0206442	0.282484	-0.976215	0.549005
Other pharmacogenomic interactions	193	GW-2580	CSF1R	RNF43_mut	PAAD	4	29	0.0407519	0.183383	-1.10937	0.73664	0.345377	0.777099	-0.486279	0.109524
Other pharmacogenomic interactions	1029	Motesanib	VEGFR, RET, KIT, PDGFR	NRAS_mut	SKCM	9	43	0.017472	0.183456	-0.906704	0.736468	0.0528203	0.554613	-0.8049	0.25601
Other pharmacogenomic interactions	303	PIK-93	PI3Kgamma	loss:cnaSTAD13	STAD	11	21	0.0166821	0.183503	-1.26005	0.736357	0.0754314	0.331898	-0.970936	0.478995
Other pharmacogenomic interactions	1008	Methotrexate	Antimetabolite	EP300_mut	UCEC	4	8	0.0667287	0.183504	-1.16593	0.736354	0.0630967	0.347032	-1.17292	0.45963
Other pharmacogenomic interactions	1008	Methotrexate	Antimetabolite	MKL1_mut	UCEC	3	8	0.0467026	0.183504	-1.61571	0.736354	0.283229	0.623105	-1.42736	0.205439
Other pharmacogenomic interactions	1008	Methotrexate	Antimetabolite	PTEN_mut	UCEC	5	8	0.0467026	0.183504	-0.220365	0.736354	0.283229	0.623105	-0.774412	0.205439
Other pharmacogenomic interactions	1007	Docetaxel	Microtubule stabiliser	loss:cnaBLCA18 (CHD9,CNOT1,CYLD,MMP2,NUP93)	BLCA	3	14	0.0459107	0.183643	-1.20856	0.736026	0.0326506	0.130602	-1.5967	0.884049
Other pharmacogenomic interactions	182	Obatoclax Mesylate	BCL2, BCL-XL, BCL-W, MCL1	TP53_mut	THCA	11	16	0.0613645	0.184094	-1.04754	0.734961	0.225151	0.337726	-0.736621	0.471435
Other pharmacogenomic interactions	127	GSK269962A	ROCK1, ROCK2	loss:cnaSTAD13	STAD	3	7	0.0920507	0.184101	-0.178889	0.734943	0.00103483	0.00206967	-0.224995	2.6841
Other pharmacogenomic interactions	127	GSK269962A	ROCK1, ROCK2	loss:cnaSTAD16	STAD	3	7	0.0920507	0.184101	-0.212757	0.734943	0.00103483	0.00206967	-0.108145	2.6841
Other pharmacogenomic interactions	1143	HG-5-88-01	EGFR, ADCK4	loss:cnaOV57 (ZNRF3)	OV	4	22	0.0575418	0.184134	-1.30097	0.734867	0.270862	0.62595	-0.825919	0.20346
Other pharmacogenomic interactions	172	Embelin	XIAP	NRAS_mut	THCA	3	16	0.122761	0.184142	-0.98685	0.734847	0.154257	0.231386	-0.997578	0.635664
Other pharmacogenomic interactions	1024	Lestauritinib	FLT3, JAK2, NTRK1, NTRK2, NTRK3	loss:cnaLGG1 (BNC2,CDKN2A,JAK2,PSIP1)	LGG	8	14	0.0307494	0.184497	-1.32292	0.734011	0.0826232	0.371106	-1.03262	0.430502
Other pharmacogenomic interactions	1017	Olaparib	PARP1, PARP2	gain:cnaLGG16 (EGFR)	LGG	5	15	0.0307622	0.184573	-1.38047	0.733832	0.000619901	0.0037194	-2.57847	2.42953
Other pharmacogenomic interactions	9	MG-132	Proteasome, CAPN1	loss:cnaSKCM4 (BNC2,CDKN2A,JAK2,PSIP1)	SKCM	11	17	0.041101	0.184954	-0.71532	0.732936	0.00271693	0.0244524	-0.831005	1.61168
Other pharmacogenomic interactions	330	XMD13-2	RIPK1	loss:cnaSTAD48 (FAT1,IRF2)	STAD	8	21	0.00841758	0.185187	-1.0232	0.73239	0.058281	0.849298	-0.775843	0.07094
Other pharmacogenomic interactions	1372	Trametinib	MEK1, MEK2	BRAF_mut	THCA	7	16	0.061784	0.185352	-1.2025	0.732003	0.0563129	0.168939	-1.24655	0.77227
Other pharmacogenomic interactions	165	DMOG	HIF-PH	gain:cnaLGG16 (EGFR)	LGG	5	17	0.0264949	0.185464	-1.35779	0.73174	0.0481506	0.112351	-1.18988	0.949421
Other pharmacogenomic interactions	1011	Navitoclax	BCL2, BCL-XL, BCL-W	loss:cnaBRCA7 (FAS,PTEN)	BRCA	4	43	0.0355494	0.185647	-1.01907	0.731313	0.00853813	0.0802584	-1.26009	1.09551
Other pharmacogenomic interactions	1054	Palbociclib	CDK4, CDK6	loss:cnaSKCM26	SKCM	3	40	0.0267499	0.18583	-0.635265	0.730884	0.0728036	0.273811	-0.286097	0.562549
Other pharmacogenomic interactions	1054	Palbociclib	CDK4, CDK6	loss:cnaSKCM3	SKCM	6	40	0.0278745	0.18583	-0.990078	0.730884	0.0821434	0.273811	-0.794346	0.562549
Other pharmacogenomic interactions	253	XMD14-99	ALK, CDK7, LTK, others	gain:cnaBLCA23 (MYC)	BLCA	4	19	0.0309779	0.185867	-1.11207	0.730797	0.0450594	0.28196	-1.02897	0.549812
Other pharmacogenomic interactions	282	Pelitinib	EGFR	gain:cnaBRCA26 (CDK12,ERBB2,MED24)	BRCA	13	47	0.00395694	0.185976	-0.966246	0.730543	0.00606608	0.285106	-0.969747	0.544994
Other pharmacogenomic interactions	222	BX-912	PDK1 (PDPK1)	gain:cnaLGG16 (EGFR)	LGG	5	17	0.0265746	0.186022	-1.32903	0.730435	0.0251428	0.175999	-1.35082	0.754489
Other pharmacogenomic interactions	1259	Talazoparib	PARP1, PARP2	BRCA2_mut	BRCA	5	46	0.00373293	0.186646	-1.62631	0.72898	0.00453791	0.226895	-1.58911	0.644175
Other pharmacogenomic interactions	286	KIN001-236	Angiopoietin-1 receptor	loss:cnaOV36	OV	3	32	0.0508641	0.18665	-1.13336	0.728973	0.732489	0.970994	-0.127072	0.0127834
Other pharmacogenomic interactions	286	KIN001-236	Angiopoietin-1 receptor	loss:cnaOV56	OV	3	32	0.0533284	0.18665	-1.12035	0.728973	0.541423	0.970994	-0.292175	0.0127834
Other pharmacogenomic interactions	1230	IOX2	EGLN1	PTEN_mut	KIRC	3	30	0.0186696	0.186696	-1.68911	0.728865	0.317724	0.484847	0.650984	-0.314396
Other pharmacogenomic interactions	346	THZ-2-102-1	CDK7	gain:cnaESCA2 (KRAS)	ESCA	3	35	0.0233686	0.186949	-0.781477	0.728277	0.0440638	0.35251	-0.798438	0.452828
Other pharmacogenomic interactions	346	THZ-2-102-1	CDK7	gain:cnaESCA3 (KRAS)	ESCA	3	35	0.0233686	0.186949	-0.781477	0.728277	0.0440638	0.35251	-0.798438	0.452828
Other pharmacogenomic interactions	1529	Pevonedistat	NAE	loss:cnaLUSC3	LUSC	4	11	0.109112	0.18705	-0.995479	0.728042	0.143366	0.255705	-0.936907	0.59226
Other pharmacogenomic interactions	1011	Navitoclax	BCL2, BCL-XL, BCL-W	loss:cnaBRCA38	BRCA	3	43	0.039993	0.187516	-1.1557	0.726962	0.0296172	0.154667	-1.20955	0.810601
Other pharmacogenomic interactions	1011	Navitoclax	BCL2, BCL-XL, BCL-W	loss:cnaBRCA17	BRCA	6	43	0.0438867	0.187516	-0.851598	0.726962	0.0579964	0.234301	-0.792814	0.630225
Other pharmacogenomic interactions	1230	IOX2	EGLN1	gain:cnaLGG16 (EGFR)	LGG	5	17	0.0536912	0.187919	-1.14548	0.726029	0.115399	0.161558	-0.920075	0.791671
Other pharmacogenomic interactions	205	Avagacestat	Amyloid beta20, Amyloid beta40	gain:cnaLUSC37	LUSC	3	14	0.0352687	0.188099	-1.57832	0.725612	0.195988	0.522635	-0.867536	0.281802
Other pharmacogenomic interactions	205	Avagacestat	Amyloid beta20, Amyloid beta40	gain:cnaLUSC6 (FGFR1,WHSC1L1)	LUSC	3	14	0.0352687	0.188099	-1.57832	0.725612	0.195988	0.522635	-0.867536	0.281802
Other pharmacogenomic interactions	205	Avagacestat	Amyloid beta20, Amyloid beta40	gain:cnaLUSC7 (MYC)	LUSC	3	14	0.0352687	0.188099	-1.57832	0.725612	0.195988	0.522635	-0.867536	0.281802
Other pharmacogenomic interactions	29	AZ628	BRAF	loss:cnaSKCM4 (BNC2,CDKN2A,JAK2,PSIP1)	SKCM	11	16	0.0406594	0.18899	-0.534214	0.723562	0.0337448	0.23258	-0.749221	0.633427
Other pharmacogenomic interactions	177	GSK650394	SGK2, SGK3	gain:cnaLUAD3 (TERT)	LUAD	12	59	0.00450784	0.189329	-0.988871	0.722783	0.0359967	0.516801	-0.733671	0.286677
Other pharmacogenomic interactions	1243	Piperlongumine	Induces reactive oxygen species	gain:cnaPAAD3	PAAD	4	29	0.105396	0.189712	-0.772155	0.721905	0.034167	0.0615005	-1.18939	1.21112
Other pharmacogenomic interactions	262	VX-11e	ERK2	loss:cnaSTAD41	STAD	13	21	0.0259024	0.189951	-1.31066	0.721359	0.0402688	0.195455	-1.43699	0.708954
Other pharmacogenomic interactions	291	KIN001-266	MAP3K8	NF1_mut	GBM	8	35	0.011687	0.189992	-0.948765	0.721265	0.0277601	0.305361	-0.912682	0.515186
Other pharmacogenomic interactions	1003	Camptothecin	TOP1	loss:cnaDLBC4 (CDKN2A)	DLBC	8	30	0.0712494	0.189998	-0.967036	0.72125	0.0442438	0.176975	-1.04207	0.752088
Other pharmacogenomic interactions	53	CGP-60474	CDK1,CDK2,CDK5,CDK7,CDK9, PKC	TP53_mut	LGG	8	11	0.0950699	0.19014	-1.30905	0.720927	0.104719	0.163937	-1.25685	0.785324
Other pharmacogenomic interactions	35	NVP-TAE684	ALK	RB1_mut	LGG	5	11	0.0951096	0.190219	-0.87306	0.720746	0.074577	0.223731	-0.873726	0.650274
Other pharmacogenomic interactions	1025	SB216763	GSK3A, GSK3B	CREBBP_mut	DLBC	7	30	0.0237779	0.190223	-1.02785	0.720736	0.550876	0.814927	-0.311133	0.0888815
Other pharmacogenomic interactions	288	WHI-P97	JAK3	gain:cnaGBM122	GBM	9	35	0.0693845	0.190807	-0.73933	0.719405	0.940399	0.979594	-0.0492933	0.00895397
Other pharmacogenomic interactions	1377	Afatinib	ERBB2, EGFR	TP53_mut	HNSC	36	40	0.0146801	0.190841	-1.35612	0.719328	0.0073849	0.14978	-1.50497	0.824547
Other pharmacogenomic interactions	167	OSU-03012	PDK1 (PDPK1)	loss:cnaSTAD12	STAD	3	20	0.00954217	0.190843	-0.628109	0.719323	0.00898274	0.170773	-0.935408	0.76758
Other pharmacogenomic interactions	255	CP724714	ERBB2	CDKN2A_mut	PAAD	4	29	0.0425301	0.191385	-1.17726	0.718091	0.886299	0.886299	0.0750585	-0.0524197
Other pharmacogenomic interactions	273	CUDC-101	HDAC1-10, EGFR, ERBB2	loss:cnaCOREAD48	COREAD	6	46	0.0192299	0.191497	-0.747943	0.717838	0.00320185	0.0586726	-0.911867	1.23156
Other pharmacogenomic interactions	208	Ispinesib Mesylate	KSP	loss:cnaKIRC22	KIRC	10	31	0.0548997	0.192149	-0.674861	0.716362	0.264679	0.588967	-0.300489	0.229909
Other pharmacogenomic interactions	288	WHI-P97	JAK3	BRAF_mut	THCA	7	16	0.128184	0.192276	-0.698106	0.716075	0.0682815	0.204844	-1.30219	0.688576
Other pharmacogenomic interactions	261	TL-1-85	TAK	loss:cnaSTAD13	STAD	11	21	0.00909216	0.192287	-1.461	0.716049	0.0320408	0.352449	-1.13593	0.452903
Other pharmacogenomic interactions	1091	BMS-536924	IGF1R, IR	RNF43_mut	PAAD	4	29	0.0541297	0.192295	-1.07471	0.716031	0.0338972	0.156016	-1.24412	0.806832
Other pharmacogenomic interactions	266	Zibotentan	Endothelin-1 receptor (EDNRA)	TP53_mut	BLCA	15	19	0.0320609	0.192365	-1.33367	0.715873	0.0821208	0.432715	-1.07709	0.363798
Other pharmacogenomic interactions	197	Bryostatin 1	PKC	loss:cnaOV20	OV	4	19	0.0330083	0.192548	-1.2664	0.71546	0.330877	0.616589	-0.534728	0.210004
Other pharmacogenomic interactions	225	Genentech Cpd 10	AURKA, AURKB	VHL_mut	KIRC	11	31	0.0183495	0.19267	-0.91319	0.715187	0.0156452	0.164275	-0.876758	0.78443
Other pharmacogenomic interactions	258	STF-62247	Autophagy inducer	CREBBP_mut	LAML	3	25	0.0642653	0.192796	-1.29339	0.714903	0.208467	0.528	-0.986124	0.277366
Other pharmacogenomic interactions	1020	Lenalidomide	CRBN	BRCA2_mut	BRCA	5	45	0.00410683	0.193021	-1.20747	0.714395	0.224911	0.870338	-0.235381	0.0603119
Other pharmacogenomic interactions	1264	SGC0946	DOT1L	gain:cnaBLCA15 (ASXL1)	BLCA	6	18	0.0176467	0.194114	-1.39265	0.711943	0.653093	0.898002	0.252876	-0.0467225
Other pharmacogenomic interactions	268	Sepantronium bromide	BIRC5	loss:cnaLUSC54	LUSC	6	14	0.0485311	0.194124	-1.06162	0.71192	0.0740509	0.296204	-1.03921	0.52841
Other pharmacogenomic interactions	266	Zibotentan	Endothelin-1 receptor (EDNRA)	loss:cnaLUAD25	LUAD	4	61	0.00463064	0.194487	-1.27147	0.71111	0.13133	0.931011	-0.92933	0.031045
Other pharmacogenomic interactions	294	MPS-1-IN-1	MPS1	NF1_mut	GBM	8	35	0.00590812	0.194968	-0.82337	0.710037	0.00043	0.01419	-1.17285	1.84802
Other pharmacogenomic interactions	245	UNC0638	G9a and GLP methyltransferases	loss:cnaKIRC12	KIRC	11	30	0.0513134	0.194991	-0.353117	0.709986	0.0760516	0.24083	-0.163017	0.618289
Other pharmacogenomic interactions	245	UNC0638	G9a and GLP methyltransferases	loss:cnaKIRC13	KIRC	11	30	0.0513134	0.194991	-0.353117	0.709986	0.0760516	0.24083	-0.163017	0.618289
Other pharmacogenomic interactions	245	UNC0638	G9a and GLP methyltransferases	loss:cnaKIRC14	KIRC	11	30	0.0513134	0.194991	-0.353117	0.709986	0.0760516	0.24083	-0.163017	0.618289
Other pharmacogenomic interactions	245	UNC0638	G9a and GLP methyltransferases	loss:cnaKIRC15	KIRC	11	30	0.0513134	0.194991	-0.353117	0.709986	0.0760516	0.24083	-0.163017	0.618289
Other pharmacogenomic interactions	326	GSK690693	AKT1, AKT2, AKT3	CREBBP_mut	DLBC	5	28	0.121903	0.195044	-0.763504	0.709867	0.180218	0.288349	-0.636017	0.540081
Other pharmacogenomic interactions	271	VNLG/124	HDAC,RAR	MLL2_mut	DLBC	9	29	0.0243915	0.195132	-0.779751	0.709671	0.252911	0.995113	-0.297969	0.00212752
Other pharmacogenomic interactions	1149	TW 37	BCL2, BCL-XL, MCL1	gain:cnaLGG16 (EGFR)	LGG	5	17	0.0836772	0.195247	-1.00925	0.709416	0.0483423	0.112799	-1.17759	0.947696
Other pharmacogenomic interactions	150	Bicalutamide	AR	HLA-A_mut	HNSC	3	42	0.025725	0.195645	-1.37003	0.708532	0.0693674	0.775609	-1.25419	0.110357
Other pharmacogenomic interactions	150	Bicalutamide	AR	loss:cnaHNSC32 (FAT1)	HNSC	14	42	0.0242737	0.195645	-0.767069	0.708532	0.144054	0.775609	-0.534388	0.110357
Other pharmacogenomic interactions	291	KIN001-266	MAP3K8	loss:cnaSTAD13	STAD	11	21	0.0356278	0.195953	-1.28805	0.707848	0.0334617	0.234298	-1.28155	0.630231
Other pharmacogenomic interactions	1015	CI-1040	MEK1, MEK2	gain:cnaLUSC41 (AKAP9)	LUSC	3	13	0.0816618	0.195988	-0.646773	0.70777	0.175315	0.350629	-0.64653	0.455152
Other pharmacogenomic interactions	344	THZ-2-49	CDK9	loss:cnaCOREAD19	COREAD	18	46	0.00222847	0.196105	-1.03181	0.707511	0.0208122	0.561259	-0.760892	0.250837
Other pharmacogenomic interactions	1230	IOX2	EGLN1	gain:cnaSKCM21 (FOXP1,MITF)	SKCM	8	54	0.00817865	0.196288	-1.1141	0.707107	0.217569	0.553689	-0.476501	0.256734
Other pharmacogenomic interactions	229	Enzastaurin	PKCB	loss:cnaKIRC23	KIRC	4	31	0.0561425	0.196499	-0.636424	0.706641	0.114654	0.327087	-0.339599	0.485336
Other pharmacogenomic interactions	308	WIKI4	TNKS1, TNKS2	loss:cnaGBM47	GBM	6	35	0.0716186	0.196951	-0.919041	0.705641	0.0301426	0.0994705	-1.05448	1.00231
Other pharmacogenomic interactions	150	Bicalutamide	AR	loss:cnaLIHC10 (RB1)	LIHC	3	17	0.065749	0.197247	-1.28789	0.704989	0.109187	0.304714	-1.12639	0.516108
Other pharmacogenomic interactions	154	CHIR-99021	GSK3A, GSK3B	CHD4_mut	UCEC	3	9	0.0146028	0.197301	-1.77651	0.704871	0.465056	0.787105	0.837095	-0.103967
Other pharmacogenomic interactions	171	AKT inhibitor VIII	AKT1, AKT2, AKT3	loss:cnaSKCM26	SKCM	3	51	0.00858878	0.197542	-1.23036	0.704341	0.133026	0.521597	-0.493031	0.282665
Other pharmacogenomic interactions	255	CP724714	ERBB2	loss:cnaLUAD16	LUAD	6	61	0.00942663	0.197959	-1.09917	0.703424	0.0261808	0.299379	-0.907006	0.523779
Other pharmacogenomic interactions	1091	BMS-536924	IGF1R, IR	loss:cnaLUAD1 (CDKN2A)	LUAD	37	61	0.00472741	0.198551	-0.712698	0.702127	0.00499509	0.179627	-0.713663	0.745627
Other pharmacogenomic interactions	5	Sunitinib	PDGFR, KIT, VEGFR, FLT3, RET, CSF1R	BRAF_mut	SKCM	12	18	0.0441324	0.198596	-1.10847	0.70203	0.0488613	0.219876	-1.10132	0.657822
Other pharmacogenomic interactions	306	Fedratinib	JAK2	loss:cnaSTAD13	STAD	11	21	0.00902717	0.198598	-1.36752	0.702026	0.0296044	0.651297	-0.98599	0.186221
Other pharmacogenomic interactions	1012	Vorinostat	HDAC inhibitor Class I, IIa, IIb, IV	loss:cnaLUSC17 (FAT1,IRF2)	LUSC	6	13	0.024738	0.198653	-1.43293	0.701906	0.00725106	0.0569496	-1.94239	1.24451
Other pharmacogenomic interactions	1012	Vorinostat	HDAC inhibitor Class I, IIa, IIb, IV	loss:cnaLUSC3	LUSC	6	13	0.0346865	0.198653	-1.47431	0.701906	0.00949159	0.0569496	-1.77428	1.24451
Other pharmacogenomic interactions	152	CP466722	ATM	loss:cnaGBM132	GBM	3	35	0.081854	0.19877	-0.887933	0.70165	0.0668808	0.183922	-0.992252	0.735366
Other pharmacogenomic interactions	152	CP466722	ATM	NF1_mut	GBM	8	35	0.0843266	0.19877	-0.83673	0.70165	0.152553	0.31464	-0.700595	0.502186
Other pharmacogenomic interactions	271	VNLG/124	HDAC,RAR	loss:cnaSKCM5 (PAX5)	SKCM	4	52	0.00858791	0.198777	-1.42248	0.701634	0.09146	0.54876	-0.863504	0.260618
Other pharmacogenomic interactions	184	BMS-754807	IGF1R, IR	loss:cnaKIRC16	KIRC	3	24	0.0523596	0.198967	-0.959418	0.70122	0.00628573	0.0662647	-1.32203	1.17872
Other pharmacogenomic interactions	1010	Gefitinib	EGFR	NF2_mut	KIRC	4	24	0.0332661	0.199003	-1.21917	0.70114	0.195369	0.309334	-0.986033	0.509572
Other pharmacogenomic interactions	155	Ponatinib	ABL, PDGFRA, VEGFR2, FGFR1, SRC, TIE2, FLT3	CDKN2A_mut	PAAD	4	30	0.022128	0.199152	-1.30669	0.700816	0.0482614	0.434353	-1.1346	0.362157
Other pharmacogenomic interactions	1170	CCT-018159	HSP90	gain:cnaLGG16 (EGFR)	LGG	5	17	0.122669	0.199177	-0.903506	0.70076	0.101073	0.235838	-0.968145	0.627387
Other pharmacogenomic interactions	1170	CCT-018159	HSP90	RB1_mut	LGG	7	17	0.159604	0.199177	-0.702086	0.70076	0.45885	0.600005	-0.357174	0.221845
Other pharmacogenomic interactions	1375	Temozolomide	DNA alkylating agent	gain:cnaESCA11 (CCND1,CTTN)	ESCA	13	32	0.012454	0.199264	-0.815044	0.700571	0.000159049	0.00254478	-1.02473	2.59435
Other pharmacogenomic interactions	1013	Nilotinib	ABL	loss:cnaSTAD27 (MAP2K4)	STAD	4	22	0.0225257	0.199294	-1.34641	0.700505	0.17343	0.748045	-0.342919	0.126072
Other pharmacogenomic interactions	1013	Nilotinib	ABL	loss:cnaSTAD11	STAD	4	22	0.0276983	0.199294	-1.3742	0.700505	0.415659	0.817124	-0.284633	0.0877119
Other pharmacogenomic interactions	1013	Nilotinib	ABL	loss:cnaSTAD12	STAD	4	22	0.0503934	0.199294	-1.23636	0.700505	0.58366	0.817124	-0.220049	0.0877119
Other pharmacogenomic interactions	1013	Nilotinib	ABL	loss:cnaSTAD7	STAD	5	22	0.043191	0.199294	-1.09634	0.700505	0.981127	0.981127	-0.145675	0.00827497
Other pharmacogenomic interactions	1013	Nilotinib	ABL	loss:cnaSTAD42	STAD	4	22	0.0569412	0.199294	-1.13535	0.700505	0.417954	0.817124	0.38228	-0.0877119
Other pharmacogenomic interactions	1013	Nilotinib	ABL	gain:cnaSTAD45 (MET)	STAD	3	22	0.0481425	0.199294	-1.42064	0.700505	0.184031	0.748045	0.583261	-0.126072
Other pharmacogenomic interactions	302	PI-103	PI3Kalpha, DAPK3, CLK4, PIM3, HIPK2	RNF43_mut	COREAD	10	46	0.00226641	0.199444	-1.31671	0.700179	0.00969974	0.426788	-1.30035	0.369787
Other pharmacogenomic interactions	29	AZ628	BRAF	loss:cnaCOREAD19	COREAD	4	15	0.00767681	0.199597	-2.25402	0.699846	0.00756242	0.0983114	-2.35243	1.0074
Other pharmacogenomic interactions	258	STF-62247	Autophagy inducer	loss:cnaKIRC22	KIRC	9	30	0.0525482	0.199683	-0.889731	0.699659	0.0784574	0.219228	-0.738489	0.659104
Other pharmacogenomic interactions	1377	Afatinib	ERBB2, EGFR	loss:cnaLUAD16	LUAD	5	58	0.00975844	0.200048	-1.29194	0.698866	0.0192333	0.262855	-1.15705	0.580283
Other pharmacogenomic interactions	333	T0901317	LXR, FXR	loss:cnaKIRC12	KIRC	12	31	0.0381069	0.200061	-0.478475	0.698837	0.499404	0.806729	-0.0702274	0.0932724
Other pharmacogenomic interactions	333	T0901317	LXR, FXR	loss:cnaKIRC13	KIRC	12	31	0.0381069	0.200061	-0.478475	0.698837	0.499404	0.806729	-0.0702274	0.0932724
Other pharmacogenomic interactions	333	T0901317	LXR, FXR	loss:cnaKIRC14	KIRC	12	31	0.0381069	0.200061	-0.478475	0.698837	0.499404	0.806729	-0.0702274	0.0932724
Other pharmacogenomic interactions	333	T0901317	LXR, FXR	loss:cnaKIRC15	KIRC	12	31	0.0381069	0.200061	-0.478475	0.698837	0.499404	0.806729	-0.0702274	0.0932724
Other pharmacogenomic interactions	37	Crizotinib	MET, ALK, ROS1	gain:cnaSKCM12 (KRAS)	SKCM	4	18	0.0222505	0.200255	-0.90761	0.698417	0.654792	0.736642	-0.0796538	0.132744
Other pharmacogenomic interactions	110	Seliciclib	CDK2, CDK7, CDK9	loss:cnaSTAD13	STAD	3	7	0.100474	0.200948	-0.808686	0.696915	0.467125	0.622834	-0.683968	0.205628
Other pharmacogenomic interactions	207	AS601245	JNK1, JNK2, JNK2	loss:cnaKIRC22	KIRC	6	24	0.060156	0.201062	-0.650584	0.696671	0.131744	0.395731	-0.426673	0.4026
Other pharmacogenomic interactions	207	AS601245	JNK1, JNK2, JNK2	loss:cnaKIRC3	KIRC	3	24	0.0740754	0.201062	-0.430259	0.696671	0.166624	0.395731	-0.133775	0.4026
Other pharmacogenomic interactions	207	AS601245	JNK1, JNK2, JNK2	loss:cnaKIRC4	KIRC	3	24	0.0740754	0.201062	-0.430259	0.696671	0.166624	0.395731	-0.133775	0.4026
Other pharmacogenomic interactions	1008	Methotrexate	Antimetabolite	gain:cnaBRCA47 (EGFR)	BRCA	7	45	0.00427857	0.201093	-1.12079	0.696603	0.0017746	0.083406	-1.07697	1.0788
Other pharmacogenomic interactions	1023	GW441756	NTRK1	loss:cnaSKCM4 (BNC2,CDKN2A,JAK2,PSIP1)	SKCM	30	46	0.0317696	0.201208	-0.79399	0.696356	0.478626	0.731089	-0.319091	0.13603
Other pharmacogenomic interactions	1377	Afatinib	ERBB2, EGFR	SMAD4_mut	HNSC	5	40	0.0309765	0.201348	-1.09824	0.696054	0.0212229	0.183932	-1.17528	0.735344
Other pharmacogenomic interactions	1377	Afatinib	ERBB2, EGFR	gain:cnaHNSC2 (EGFR)	HNSC	11	40	0.0291734	0.201348	-0.812137	0.696054	0.0405871	0.263816	-0.760318	0.578699
Other pharmacogenomic interactions	253	XMD14-99	ALK, CDK7, LTK, others	loss:cnaLIHC7 (CDKN2A)	LIHC	4	17	0.0671971	0.201591	-1.25062	0.695529	0.704056	0.737615	0.137336	-0.13217
Other pharmacogenomic interactions	150	Bicalutamide	AR	BCOR_mut	STAD	3	20	0.010083	0.20166	-1.83059	0.69538	0.0337251	0.168625	-1.36467	0.773077
Other pharmacogenomic interactions	59	WZ-1-84	BMX	TP53_mut	SKCM	3	18	0.134461	0.201691	-0.171483	0.695314	0.00827384	0.0744645	-0.849037	1.12805
Other pharmacogenomic interactions	59	WZ-1-84	BMX	gain:cnaSKCM12 (KRAS)	SKCM	4	18	0.0884543	0.201691	-0.617639	0.695314	0.0388706	0.174918	-1.13264	0.757166
Other pharmacogenomic interactions	59	WZ-1-84	BMX	NRAS_mut	SKCM	6	18	0.124377	0.201691	-0.568293	0.695314	0.231795	0.347693	-0.547712	0.458804
Other pharmacogenomic interactions	59	WZ-1-84	BMX	loss:cnaSKCM27 (CASP1)	SKCM	3	18	0.0755848	0.201691	-0.56738	0.695314	0.357382	0.426775	-0.394902	0.369801
Other pharmacogenomic interactions	29	AZ628	BRAF	SACS_mut	COREAD	3	15	0.0155237	0.201808	-2.30554	0.695061	0.00584294	0.0983114	-2.75955	1.0074
Other pharmacogenomic interactions	293	Amuvatinib	KIT, PDGFRA, FLT3	MLL2_mut	ESCA	3	35	0.0252515	0.202012	-1.30432	0.694623	0.162505	0.650021	-0.900254	0.187073
Other pharmacogenomic interactions	1006	Cytarabine	Antimetabolite	MLL2_mut	DLBC	8	30	0.0505562	0.202225	-0.929189	0.694166	0.0237224	0.18978	-1.04911	0.721751
Other pharmacogenomic interactions	288	WHI-P97	JAK3	gain:cnaGBM123 (EGFR)	GBM	10	35	0.0849535	0.202242	-0.624512	0.694129	0.48434	0.726511	-0.189151	0.138758
Other pharmacogenomic interactions	288	WHI-P97	JAK3	NF1_mut	GBM	8	35	0.0857996	0.202242	-0.774481	0.694129	0.829091	0.943449	-0.196913	0.0252818
Other pharmacogenomic interactions	282	Pelitinib	EGFR	loss:cnaGBM47	GBM	6	35	0.0736545	0.20255	-0.913105	0.693468	0.0712972	0.325349	-0.850966	0.487651
Other pharmacogenomic interactions	303	PIK-93	PI3Kgamma	loss:cnaKIRC12	KIRC	12	31	0.0482503	0.202651	-0.33765	0.693251	0.113764	0.298631	-0.313088	0.524864
Other pharmacogenomic interactions	303	PIK-93	PI3Kgamma	loss:cnaKIRC13	KIRC	12	31	0.0482503	0.202651	-0.33765	0.693251	0.113764	0.298631	-0.313088	0.524864
Other pharmacogenomic interactions	303	PIK-93	PI3Kgamma	loss:cnaKIRC14	KIRC	12	31	0.0482503	0.202651	-0.33765	0.693251	0.113764	0.298631	-0.313088	0.524864
Other pharmacogenomic interactions	303	PIK-93	PI3Kgamma	loss:cnaKIRC15	KIRC	12	31	0.0482503	0.202651	-0.33765	0.693251	0.113764	0.298631	-0.313088	0.524864
Other pharmacogenomic interactions	202	GSK1904529A	IGF1R, IR	BRAF_mut	COREAD	9	38	0.00273901	0.202687	-1.08895	0.693175	0.115523	0.69973	-0.640473	0.15507
Other pharmacogenomic interactions	38	Saracatinib	ABL, SRC	CREBBP_mut	DLBC	7	27	0.0507009	0.202804	-0.988475	0.692924	0.215367	0.3524	-0.62608	0.452964
Other pharmacogenomic interactions	38	Saracatinib	ABL, SRC	EP300_mut	DLBC	5	27	0.0306466	0.202804	-0.982305	0.692924	0.266154	0.3524	-0.460255	0.452964
Other pharmacogenomic interactions	158	PF-562271	FAK, FAK2	NCOR1_mut	COREAD	6	39	0.00540848	0.202818	-1.42482	0.692893	0.0235175	0.490345	-1.20302	0.309498
Other pharmacogenomic interactions	256	JW-7-24-1	LCK	gain:cnaESCA2 (KRAS)	ESCA	3	35	0.0253536	0.202829	-0.672463	0.69287	0.0171324	0.137059	-0.750338	0.863093
Other pharmacogenomic interactions	256	JW-7-24-1	LCK	gain:cnaESCA3 (KRAS)	ESCA	3	35	0.0253536	0.202829	-0.672463	0.69287	0.0171324	0.137059	-0.750338	0.863093
Other pharmacogenomic interactions	185	Linsitinib	IGF1R	gain:cnaESCA9 (EGFR)	ESCA	6	26	0.0639207	0.203019	-0.532969	0.692463	0.0944813	0.238457	-0.576984	0.622591
Other pharmacogenomic interactions	185	Linsitinib	IGF1R	NFE2L2_mut	ESCA	3	26	0.0725068	0.203019	-0.781134	0.692463	0.0617294	0.238457	-0.967982	0.622591
Other pharmacogenomic interactions	185	Linsitinib	IGF1R	NOTCH1_mut	ESCA	4	26	0.03215	0.203019	-1.53154	0.692463	0.05505	0.238457	-1.39779	0.622591
Other pharmacogenomic interactions	170	Shikonin	not defined	gain:cnaLGG16 (EGFR)	LGG	5	17	0.10493	0.203033	-0.847607	0.692433	0.0973795	0.191109	-0.901537	0.718718
Other pharmacogenomic interactions	170	Shikonin	not defined	RB1_mut	LGG	7	17	0.116019	0.203033	-0.852676	0.692433	0.109205	0.191109	-0.880364	0.718718
Other pharmacogenomic interactions	208	Ispinesib Mesylate	KSP	loss:cnaHNSC32 (FAT1)	HNSC	13	40	0.00781308	0.20314	-0.930179	0.692205	0.0228072	0.545858	-0.778293	0.262921
Other pharmacogenomic interactions	192	LFM-A13	BTK	loss:cnaSTAD42	STAD	3	20	0.0101618	0.203236	-2.2547	0.691999	0.0443333	0.443333	0.772994	-0.35327
Other pharmacogenomic interactions	193	GW-2580	CSF1R	gain:cnaBRCA19	BRCA	4	48	0.00902634	0.203459	-1.20989	0.691524	0.105444	0.843682	-0.310673	0.0738211
Other pharmacogenomic interactions	193	GW-2580	CSF1R	loss:cnaBRCA22 (SYNCRIP,ZNF292)	BRCA	18	48	0.0127162	0.203459	-0.591163	0.691524	0.676614	0.966195	0.138335	-0.014935
Other pharmacogenomic interactions	1009	Tretinoin	Retinoic acid	TP53_mut	SKCM	16	47	0.017257	0.203541	-0.587949	0.691349	0.0326199	0.342509	-0.480707	0.465328
Other pharmacogenomic interactions	1009	Tretinoin	Retinoic acid	loss:cnaSKCM9	SKCM	3	47	0.0193848	0.203541	-1.38863	0.691349	0.356701	0.84973	-0.518861	0.070719
Other pharmacogenomic interactions	1143	HG-5-88-01	EGFR, ADCK4	loss:cnaOV54	OV	5	22	0.0717185	0.203597	-1.07303	0.691228	0.0656632	0.615647	-1.00237	0.210668
Other pharmacogenomic interactions	1143	HG-5-88-01	EGFR, ADCK4	loss:cnaOV16	OV	3	22	0.0975569	0.203597	-1.25558	0.691228	0.57422	0.744934	-0.609573	0.127882
Other pharmacogenomic interactions	1143	HG-5-88-01	EGFR, ADCK4	loss:cnaOV17	OV	3	22	0.0975569	0.203597	-1.25558	0.691228	0.57422	0.744934	-0.609573	0.127882
Other pharmacogenomic interactions	1143	HG-5-88-01	EGFR, ADCK4	loss:cnaOV41	OV	3	22	0.0975569	0.203597	-1.25558	0.691228	0.57422	0.744934	-0.609573	0.127882
Other pharmacogenomic interactions	1143	HG-5-88-01	EGFR, ADCK4	loss:cnaOV42	OV	3	22	0.0975569	0.203597	-1.25558	0.691228	0.57422	0.744934	-0.609573	0.127882
Other pharmacogenomic interactions	1143	HG-5-88-01	EGFR, ADCK4	loss:cnaOV43 (NF1)	OV	3	22	0.0975569	0.203597	-1.25558	0.691228	0.57422	0.744934	-0.609573	0.127882
Other pharmacogenomic interactions	1143	HG-5-88-01	EGFR, ADCK4	loss:cnaOV44	OV	3	22	0.0975569	0.203597	-1.25558	0.691228	0.57422	0.744934	-0.609573	0.127882
Other pharmacogenomic interactions	172	Embelin	XIAP	loss:cnaSKCM4 (BNC2,CDKN2A,JAK2,PSIP1)	SKCM	35	51	0.0177276	0.203867	-0.878631	0.690653	0.007295	0.0838925	-0.89587	1.07628
Other pharmacogenomic interactions	258	STF-62247	Autophagy inducer	PTEN_mut	DLBC	6	29	0.0254895	0.203916	-1.20654	0.690549	0.0624667	0.499733	-0.962528	0.301262
Other pharmacogenomic interactions	294	MPS-1-IN-1	MPS1	gain:cnaGBM25 (CDK4)	GBM	4	35	0.0123709	0.20412	-1.31259	0.690114	0.0634784	0.698262	-0.938034	0.155981
Other pharmacogenomic interactions	272	AR-42	HDAC1	loss:cnaCOREAD65	COREAD	27	45	0.0366527	0.204216	-0.837345	0.68991	0.0557887	0.238931	-0.784946	0.621727
Other pharmacogenomic interactions	281	Alectinib	ALK	loss:cnaESCA5 (PAX5)	ESCA	3	35	0.0388255	0.204281	-1.2492	0.689772	0.0886051	0.472561	-1.22834	0.325542
Other pharmacogenomic interactions	281	Alectinib	ALK	loss:cnaESCA1	ESCA	6	35	0.0270352	0.204281	-0.868401	0.689772	0.122762	0.491046	-0.841528	0.308878
Other pharmacogenomic interactions	281	Alectinib	ALK	loss:cnaESCA12	ESCA	8	35	0.0510703	0.204281	-0.689509	0.689772	0.162626	0.49603	-0.74172	0.304492
Other pharmacogenomic interactions	281	Alectinib	ALK	SMAD4_mut	ESCA	4	35	0.0469176	0.204281	-1.21386	0.689772	0.394041	0.700518	-0.48632	0.154581
Other pharmacogenomic interactions	1057	Dactolisib	PI3K (Class 1), MTORC1, MTORC2	TP53_mut	THCA	9	13	0.0681255	0.204376	-1.08807	0.689569	0.0533956	0.160187	-1.11359	0.795373
Other pharmacogenomic interactions	1133	Serdemetan	MDM2	gain:cnaLGG16 (EGFR)	LGG	5	17	0.0292111	0.204478	-1.34176	0.689353	0.0404268	0.282987	-1.23074	0.548233
Other pharmacogenomic interactions	186	Bexarotene	Retinioic X receptor (RXR) agonist	loss:cnaKIRC19	KIRC	5	22	0.0240935	0.204795	-1.24298	0.688681	0.170169	0.262988	-0.750145	0.580064
Other pharmacogenomic interactions	173	FH535	PPARgamma, PPARdelta	TP53_mut	THCA	11	16	0.0683496	0.205049	-0.809049	0.688143	0.0861149	0.258345	-0.649275	0.5878
Other pharmacogenomic interactions	293	Amuvatinib	KIT, PDGFRA, FLT3	loss:cnaLGG1 (BNC2,CDKN2A,JAK2,PSIP1)	LGG	9	17	0.0293771	0.20564	-1.2774	0.686893	0.323789	0.637667	-0.602712	0.195406
Other pharmacogenomic interactions	186	Bexarotene	Retinioic X receptor (RXR) agonist	BPTF_mut	COREAD	4	38	0.0179493	0.205692	-0.0636464	0.686783	0.0881271	0.528628	-0.145375	0.27685
Other pharmacogenomic interactions	306	Fedratinib	JAK2	loss:cnaBRCA25 (ARID1B,MAP3K4,MLLT4)	BRCA	5	48	0.00970351	0.205766	-1.10692	0.686627	0.0168235	0.30947	-1.01084	0.509381
Other pharmacogenomic interactions	306	Fedratinib	JAK2	gain:cnaBRCA19	BRCA	4	48	0.0157409	0.205766	-1.24868	0.686627	0.0387606	0.406982	-0.985491	0.390425
Other pharmacogenomic interactions	306	Fedratinib	JAK2	loss:cnaBRCA17	BRCA	10	48	0.0171471	0.205766	-0.923219	0.686627	0.042394	0.406982	-0.787733	0.390425
Other pharmacogenomic interactions	1039	SL0101	RSK, AURKB, PIM1, PIM3	TP53_mut	LAML	12	23	0.0823352	0.206204	-0.754614	0.685703	0.0733066	0.366533	-0.905208	0.435887
Other pharmacogenomic interactions	1039	SL0101	RSK, AURKB, PIM1, PIM3	NRAS_mut	LAML	7	23	0.0824815	0.206204	-0.805593	0.685703	0.558305	0.697881	-0.348587	0.156218
Other pharmacogenomic interactions	200	Dacinostat	HDAC1	ARID1A_mut	STAD	5	20	0.010331	0.20662	-0.500973	0.684828	0.0227604	0.190903	-0.441865	0.719187
Other pharmacogenomic interactions	1259	Talazoparib	PARP1, PARP2	TP53_mut	PAAD	23	27	0.0517742	0.207097	-1.11995	0.683827	0.0883846	0.353538	-0.959868	0.451563
Other pharmacogenomic interactions	263	FR-180204	ERK1, ERK2	BMPR2_mut	COREAD	13	46	0.00235435	0.207183	-0.247683	0.683646	0.118276	0.748514	-0.426449	0.1258
Other pharmacogenomic interactions	1054	Palbociclib	CDK4, CDK6	SMAD4_mut	HNSC	4	35	0.0172664	0.207197	-1.34527	0.683616	0.0193694	0.438262	-1.33141	0.358266
Other pharmacogenomic interactions	156	AZD6482	PI3Kbeta	RNF43_mut	PAAD	3	29	0.0230875	0.207788	-1.49549	0.68238	0.0827116	0.2486	-1.15114	0.604498
Other pharmacogenomic interactions	200	Dacinostat	HDAC1	TP53_mut	THCA	11	16	0.0693008	0.207902	-0.920036	0.68214	0.110428	0.331283	-0.859653	0.4798
Other pharmacogenomic interactions	1164	XMD8-92	MAPK7	PTEN_mut	DLBC	3	13	0.0346536	0.207921	-1.22349	0.682101	0.00793725	0.0476235	-1.55419	1.32218
Other pharmacogenomic interactions	294	MPS-1-IN-1	MPS1	BRAF_mut	THCA	7	16	0.0693221	0.207966	-0.869612	0.682007	0.0129533	0.0388599	-1.38366	1.4105
Other pharmacogenomic interactions	263	FR-180204	ERK1, ERK2	GNAS_mut	COREAD	3	46	0.00711308	0.20865	-2.11805	0.680581	0.19058	0.748514	-1.23214	0.1258
Other pharmacogenomic interactions	295	NVP-BHG712	EPHB4	gain:cnaGBM124	GBM	4	35	0.0253229	0.208914	-1.27535	0.680032	0.287925	0.486943	-0.537164	0.312522
Other pharmacogenomic interactions	295	NVP-BHG712	EPHB4	gain:cnaGBM122	GBM	9	35	0.0232363	0.208914	-0.833374	0.680032	0.345407	0.518111	-0.25342	0.285578
Other pharmacogenomic interactions	304	SB52334	ALK5	NF1_mut	GBM	8	35	0.0063366	0.209108	-1.15533	0.67963	0.047265	0.677179	-0.909865	0.169296
Other pharmacogenomic interactions	292	Masitinib	KIT, PDGFRA, PDGFRB	loss:cnaKIRC23	KIRC	4	31	0.0896225	0.209119	-0.85046	0.679606	0.135233	0.315545	-0.627113	0.500939
Other pharmacogenomic interactions	238	Idelalisib	PI3Kdelta	EP300_mut	DLBC	6	29	0.0261577	0.209262	-0.978349	0.67931	0.023558	0.188464	-1.04845	0.724771
Other pharmacogenomic interactions	260	NG-25	TAK1, MAP4K2	loss:cnaKIRC23	KIRC	4	31	0.0597914	0.20927	-0.786815	0.679293	0.0497223	0.199097	-0.759751	0.700936
Other pharmacogenomic interactions	199	Pazopanib	CSF1R, KIT, PDGFRA, PDGFRB	ASH1L_mut	BRCA	3	48	0.00439797	0.209346	-1.18004	0.679135	0.0830045	0.481633	-0.792227	0.317284
Other pharmacogenomic interactions	199	Pazopanib	CSF1R, KIT, PDGFRA, PDGFRB	BRCA2_mut	BRCA	6	48	0.0123145	0.209346	-1.31011	0.679135	0.189308	0.788663	-0.689814	0.103109
Other pharmacogenomic interactions	329	QL-XI-92	DDR1	loss:cnaESCA12	ESCA	8	35	0.0524486	0.209794	-1.11313	0.678206	0.151618	0.303236	-0.852426	0.518219
Other pharmacogenomic interactions	329	QL-XI-92	DDR1	SMAD4_mut	ESCA	4	35	0.0521739	0.209794	-0.840716	0.678206	0.2553	0.453868	-0.432275	0.343071
Other pharmacogenomic interactions	1072	Avagacestat	Amyloid beta20, Amyloid beta40	SMAD4_mut	PAAD	8	30	0.0466503	0.209926	-0.713254	0.677933	0.0366237	0.329613	-0.873175	0.481995
Other pharmacogenomic interactions	310	YM201636	PYKFYVE	BRAF_mut	THCA	7	16	0.0700137	0.210041	-0.648843	0.677696	0.0535472	0.160642	-1.02562	0.794142
Other pharmacogenomic interactions	182	Obatoclax Mesylate	BCL2, BCL-XL, BCL-W, MCL1	gain:cnaBLCA23 (MYC)	BLCA	4	19	0.019774	0.210127	-1.36491	0.677518	0.0383749	0.230249	-1.33306	0.637802
Other pharmacogenomic interactions	182	Obatoclax Mesylate	BCL2, BCL-XL, BCL-W, MCL1	RB1_mut	BLCA	6	19	0.0350212	0.210127	-1.1515	0.677518	0.0221886	0.230249	-1.29915	0.637802
Other pharmacogenomic interactions	197	Bryostatin 1	PKC	loss:cnaOV64 (ARID1B,MAP3K4,MLLT4)	OV	3	19	0.0420495	0.210248	-1.4263	0.677269	0.75706	0.874884	0.332434	-0.0580494
Other pharmacogenomic interactions	134	Etoposide	TOP2	VHL_mut	KIRC	8	24	0.0110669	0.210271	-1.13148	0.67722	0.08556	0.40641	-0.685892	0.391036
Other pharmacogenomic interactions	1158	XMD11-85h	BRSK2, FLT4, MARK4, PRKCD, RET, SPRK1	loss:cnaLUSC4	LUSC	4	9	0.0350515	0.210309	-1.90762	0.677142	0.0533889	0.27159	-1.69032	0.566086
Other pharmacogenomic interactions	119	Lapatinib	ERBB2, EGFR	NF2_mut	KIRC	3	9	0.0350749	0.210449	-1.08278	0.676853	0.0309688	0.185813	-1.7521	0.730924
Other pharmacogenomic interactions	1042	Doramapimod	p38, JNK2	BRAF_mut	COREAD	11	41	0.00547294	0.210708	-1.01203	0.676318	0.159856	0.868815	-0.596199	0.0610726
Other pharmacogenomic interactions	265	Tubastatin A	HDAC1, HDAC6, HDAC8	BRAF_mut	THCA	7	16	0.140558	0.210837	-0.781314	0.676053	0.187191	0.557118	-0.848877	0.254053
Other pharmacogenomic interactions	265	Tubastatin A	HDAC1, HDAC6, HDAC8	TP53_mut	THCA	11	16	0.115783	0.210837	-0.838255	0.676053	0.371412	0.557118	-0.366173	0.254053
Other pharmacogenomic interactions	1032	Afatinib	ERBB2, EGFR	TP53_mut	HNSC	30	34	0.0317312	0.210861	-1.20982	0.676003	0.024155	0.253627	-1.27304	0.595804
Other pharmacogenomic interactions	1032	Afatinib	ERBB2, EGFR	SMAD4_mut	HNSC	4	34	0.0401641	0.210861	-1.09559	0.676003	0.042407	0.296849	-1.0816	0.527464
Other pharmacogenomic interactions	182	Obatoclax Mesylate	BCL2, BCL-XL, BCL-W, MCL1	BRAF_mut	THCA	7	16	0.140632	0.210948	-0.936442	0.675824	0.175281	0.337726	-0.837349	0.471435
Other pharmacogenomic interactions	1053	MK-2206	AKT1, AKT2	TP53_mut	DLBC	19	32	0.0454583	0.211123	-0.890427	0.675465	0.0385982	0.308786	-0.847279	0.510342
Other pharmacogenomic interactions	1053	MK-2206	AKT1, AKT2	EP300_mut	DLBC	6	32	0.0527807	0.211123	-1.07535	0.675465	0.0840766	0.322204	-0.914312	0.491869
Other pharmacogenomic interactions	260	NG-25	TAK1, MAP4K2	loss:cnaKIRC24 (FAT1,IRF2)	KIRC	8	31	0.0703908	0.211172	-0.677926	0.675363	0.0700378	0.199097	-0.646614	0.700936
Other pharmacogenomic interactions	171	AKT inhibitor VIII	AKT1, AKT2, AKT3	loss:cnaSKCM5 (PAX5)	SKCM	4	51	0.0183923	0.211511	-1.33388	0.674667	0.747504	0.949761	0.149088	-0.0223855
Other pharmacogenomic interactions	300	CX-5461	RNA Polymerase 1	NF1_mut	GBM	8	35	0.00641179	0.211589	-0.817245	0.674506	0.02364	0.285418	-0.633285	0.544519
Other pharmacogenomic interactions	104	Bortezomib	Proteasome	loss:cnaCOREAD19	COREAD	4	15	0.0081414	0.211676	-1.08846	0.674328	0.00424578	0.11039	-1.29877	0.957069
Other pharmacogenomic interactions	204	Tipifarnib	Farnesyl-transferase (FNTA)	loss:cnaLIHC10 (RB1)	LIHC	3	17	0.120889	0.211758	-1.08719	0.67416	0.0863185	0.129478	-1.21311	0.887805
Other pharmacogenomic interactions	1014	Refametinib	MEK1, MEK2	gain:cnaBLCA15 (ASXL1)	BLCA	4	15	0.0192533	0.211787	-1.64935	0.674102	0.0203747	0.224122	-1.62993	0.649516
Other pharmacogenomic interactions	63	BMS-509744	ITK	NOTCH1_mut	ESCA	3	11	0.141559	0.212338	-1.30642	0.672972	0.12357	0.185355	-1.36894	0.731996
Other pharmacogenomic interactions	60	BI-2536	PLK1, PLK2, PLK3	loss:cnaCOREAD19	COREAD	4	15	0.00885534	0.212528	-2.25786	0.672584	0.000951269	0.0228305	-3.03301	1.64149
Other pharmacogenomic interactions	1142	HG-5-113-01	LOK, LTK, TRCB, ABL(T315I)	MLL2_mut	COREAD	12	38	0.00817866	0.212645	-0.122702	0.672344	0.0221238	0.575218	-0.235148	0.240168
Other pharmacogenomic interactions	211	TL-2-105	not defined	gain:cnaBRCA9 (KRAS)	BRCA	4	49	0.0041721	0.212777	-1.22124	0.672076	0.0948361	0.625942	-0.751709	0.203466
Other pharmacogenomic interactions	196	Phenformin	Biguanide agent	gain:cnaBLCA15 (ASXL1)	BLCA	6	19	0.0177399	0.212879	-1.35314	0.671868	0.095022	0.570132	-0.912246	0.244024
Other pharmacogenomic interactions	1133	Serdemetan	MDM2	gain:cnaESCA9 (EGFR)	ESCA	8	33	0.0728347	0.213029	-0.807749	0.671561	0.0330823	0.154384	-0.966421	0.811398
Other pharmacogenomic interactions	1133	Serdemetan	MDM2	gain:cnaESCA2 (KRAS)	ESCA	3	33	0.0820031	0.213029	-1.05132	0.671561	0.169858	0.396334	-0.839502	0.401938
Other pharmacogenomic interactions	1133	Serdemetan	MDM2	gain:cnaESCA3 (KRAS)	ESCA	3	33	0.0820031	0.213029	-1.05132	0.671561	0.169858	0.396334	-0.839502	0.401938
Other pharmacogenomic interactions	1371	PLX-4720	BRAF	loss:cnaKIRC16	KIRC	7	30	0.0106607	0.213215	-1.15682	0.671183	0.0129372	0.214014	-1.07142	0.669559
Other pharmacogenomic interactions	301	PHA-793887	CDK2, CDK7, CDK5	gain:cnaBRCA47 (EGFR)	BRCA	7	48	0.00444483	0.213352	-0.873309	0.670904	0.00439773	0.211091	-0.774406	0.67553
Other pharmacogenomic interactions	1262	UNC1215	L3MBTL3	gain:cnaBLCA15 (ASXL1)	BLCA	6	18	0.0440009	0.213606	-1.15614	0.670386	0.301878	0.824795	-0.564663	0.0836538
Other pharmacogenomic interactions	1262	UNC1215	L3MBTL3	gain:cnaBLCA23 (MYC)	BLCA	4	18	0.0970937	0.213606	-1.13371	0.670386	0.497513	0.824795	-0.443487	0.0836538
Other pharmacogenomic interactions	1262	UNC1215	L3MBTL3	gain:cnaBLCA9	BLCA	4	18	0.0778093	0.213606	-1.05858	0.670386	0.35236	0.824795	0.566856	-0.0836538
Other pharmacogenomic interactions	300	CX-5461	RNA Polymerase 1	loss:cnaCOREAD27 (MAP2K4)	COREAD	4	46	0.00485484	0.213613	-1.29926	0.670372	0.0448243	0.904198	-0.752953	0.0437363
Other pharmacogenomic interactions	1218	JQ1	BRD2, BRD3, BRD4, BRDT	SACS_mut	COREAD	9	49	0.00949884	0.213724	-0.675783	0.670147	0.00702414	0.316086	-0.87098	0.500194
Other pharmacogenomic interactions	1218	JQ1	BRD2, BRD3, BRD4, BRDT	CTCF_mut	COREAD	8	49	0.00785797	0.213724	-0.287522	0.670147	0.357903	0.92816	-0.0193124	0.032377
Other pharmacogenomic interactions	1218	JQ1	BRD2, BRD3, BRD4, BRDT	loss:cnaCOREAD42 (B2M,BUB1B,MGA,TP53BP1)	COREAD	3	49	0.00796363	0.213724	-0.933355	0.670147	0.779187	0.92816	0.449765	-0.032377
Other pharmacogenomic interactions	223	ZSTK474	PI3K (class 1)	gain:cnaBRCA39 (FOXA1,NKX2-1,PSMA6)	BRCA	7	49	0.00784682	0.213992	-1.06088	0.669602	0.00433336	0.221001	-1.11107	0.655605
Other pharmacogenomic interactions	223	ZSTK474	PI3K (class 1)	gain:cnaBRCA26 (CDK12,ERBB2,MED24)	BRCA	15	49	0.0114607	0.213992	-0.900309	0.669602	0.0150711	0.241604	-0.859034	0.616896
Other pharmacogenomic interactions	308	WIKI4	TNKS1, TNKS2	loss:cnaGBM93	GBM	6	35	0.116815	0.214162	-0.685447	0.669258	0.0897195	0.185047	-0.777116	0.732719
Other pharmacogenomic interactions	308	WIKI4	TNKS1, TNKS2	loss:cnaGBM94	GBM	6	35	0.116815	0.214162	-0.685447	0.669258	0.0897195	0.185047	-0.777116	0.732719
Other pharmacogenomic interactions	308	WIKI4	TNKS1, TNKS2	loss:cnaGBM95	GBM	6	35	0.116815	0.214162	-0.685447	0.669258	0.0897195	0.185047	-0.777116	0.732719
Other pharmacogenomic interactions	308	WIKI4	TNKS1, TNKS2	loss:cnaGBM45	GBM	3	35	0.0931853	0.214162	-1.08838	0.669258	0.280055	0.378513	-0.698317	0.421919
Other pharmacogenomic interactions	279	BIX02189	MEK5, ERK5	loss:cnaGBM100	GBM	3	35	0.0584185	0.214201	-1.20872	0.669178	0.0727297	0.218189	-1.07272	0.661167
Other pharmacogenomic interactions	279	BIX02189	MEK5, ERK5	loss:cnaGBM102	GBM	3	35	0.0584185	0.214201	-1.20872	0.669178	0.0727297	0.218189	-1.07272	0.661167
Other pharmacogenomic interactions	279	BIX02189	MEK5, ERK5	loss:cnaGBM103	GBM	3	35	0.0584185	0.214201	-1.20872	0.669178	0.0727297	0.218189	-1.07272	0.661167
Other pharmacogenomic interactions	279	BIX02189	MEK5, ERK5	loss:cnaGBM104	GBM	3	35	0.0584185	0.214201	-1.20872	0.669178	0.0727297	0.218189	-1.07272	0.661167
Other pharmacogenomic interactions	279	BIX02189	MEK5, ERK5	loss:cnaGBM105	GBM	3	35	0.0584185	0.214201	-1.20872	0.669178	0.0727297	0.218189	-1.07272	0.661167
Other pharmacogenomic interactions	279	BIX02189	MEK5, ERK5	loss:cnaGBM106	GBM	3	35	0.0584185	0.214201	-1.20872	0.669178	0.0727297	0.218189	-1.07272	0.661167
Other pharmacogenomic interactions	279	BIX02189	MEK5, ERK5	loss:cnaGBM97	GBM	3	35	0.0584185	0.214201	-1.20872	0.669178	0.0727297	0.218189	-1.07272	0.661167
Other pharmacogenomic interactions	279	BIX02189	MEK5, ERK5	loss:cnaGBM98	GBM	3	35	0.0584185	0.214201	-1.20872	0.669178	0.0727297	0.218189	-1.07272	0.661167
Other pharmacogenomic interactions	279	BIX02189	MEK5, ERK5	loss:cnaGBM99 (ANK3)	GBM	3	35	0.0584185	0.214201	-1.20872	0.669178	0.0727297	0.218189	-1.07272	0.661167
Other pharmacogenomic interactions	1372	Trametinib	MEK1, MEK2	loss:cnaGBM101	GBM	4	34	0.110385	0.214278	-0.849414	0.669023	0.203946	0.336512	-0.688646	0.473
Other pharmacogenomic interactions	119	Lapatinib	ERBB2, EGFR	gain:cnaBRCA16	BRCA	3	13	0.0504445	0.214389	-1.46449	0.668797	0.0381391	0.176307	-1.57144	0.75373
Other pharmacogenomic interactions	119	Lapatinib	ERBB2, EGFR	loss:cnaBRCA22 (SYNCRIP,ZNF292)	BRCA	3	13	0.0382414	0.214389	-1.56708	0.668797	0.0414841	0.176307	-1.54026	0.75373
Other pharmacogenomic interactions	53	CGP-60474	CDK1,CDK2,CDK5,CDK7,CDK9, PKC	RB1_mut	LGG	5	11	0.143077	0.214615	-0.993911	0.668339	0.109291	0.163937	-1.10799	0.785324
Other pharmacogenomic interactions	261	TL-1-85	TAK	loss:cnaESCA1	ESCA	6	35	0.0134322	0.214915	-1.45387	0.667733	0.0444935	0.51662	-1.3405	0.286829
Other pharmacogenomic interactions	1013	Nilotinib	ABL	loss:cnaSTAD16	STAD	8	22	0.071751	0.215253	-0.890087	0.667051	0.213682	0.748045	-0.643828	0.126072
Other pharmacogenomic interactions	3	Rapamycin	MTORC1	BRAF_mut	SKCM	8	14	0.0717522	0.215257	-0.324173	0.667044	0.0892765	0.26783	-0.332911	0.572142
Other pharmacogenomic interactions	1047	Nutlin-3a (-)	MDM2	NFE2L2_mut	ESCA	3	31	0.0143531	0.215296	-1.55516	0.666963	0.0292013	0.21901	-1.52203	0.659537
Other pharmacogenomic interactions	206	Ruxolitinib	JAK1, JAK2	BRAF_mut	THCA	7	16	0.143532	0.215298	-0.761581	0.666961	0.327026	0.612263	-0.814876	0.213062
Other pharmacogenomic interactions	341	Selisistat	SIRT1	loss:cnaLUAD14	LUAD	7	61	0.0102532	0.215318	-1.15971	0.66692	0.0177761	0.373298	-1.15227	0.427945
Other pharmacogenomic interactions	164	JQ12	HDAC1, HDAC2	VHL_mut	KIRC	8	24	0.15872	0.215405	-0.408107	0.666743	0.0134518	0.127792	-0.774782	0.893495
Other pharmacogenomic interactions	164	JQ12	HDAC1, HDAC2	TP53_mut	KIRC	9	24	0.150468	0.215405	-0.313332	0.666743	0.503537	0.735938	-0.0515229	0.133159
Other pharmacogenomic interactions	200	Dacinostat	HDAC1	loss:cnaCOREAD19	COREAD	16	38	0.0203787	0.215432	-0.782779	0.66669	0.0129301	0.159471	-0.889007	0.797318
Other pharmacogenomic interactions	260	NG-25	TAK1, MAP4K2	loss:cnaBLCA18 (CHD9,CNOT1,CYLD,MMP2,NUP93)	BLCA	3	19	0.0594409	0.215536	-1.26725	0.66648	0.0669588	0.302788	-1.25028	0.518862
Other pharmacogenomic interactions	341	Selisistat	SIRT1	loss:cnaSKCM9	SKCM	4	52	0.062894	0.215636	-0.994559	0.666278	0.246261	0.580768	-0.692175	0.235997
Other pharmacogenomic interactions	1047	Nutlin-3a (-)	MDM2	STK11_mut	LUAD	9	54	0.0239679	0.215711	-0.668487	0.666128	0.0391755	0.470106	-0.653905	0.327804
Other pharmacogenomic interactions	1047	Nutlin-3a (-)	MDM2	ARID1A_mut	LUAD	3	54	0.0184066	0.215711	-1.43339	0.666128	0.306611	0.788428	-0.587388	0.103238
Other pharmacogenomic interactions	286	KIN001-236	Angiopoietin-1 receptor	gain:cnaLUSC25	LUSC	4	14	0.0809328	0.215821	-1.1716	0.665907	0.195644	0.447187	-0.842898	0.349511
Other pharmacogenomic interactions	156	AZD6482	PI3Kbeta	gain:cnaBRCA47 (EGFR)	BRCA	7	47	0.0180038	0.216046	-1.04429	0.665454	0.0856936	0.369205	-0.781193	0.432732
Other pharmacogenomic interactions	159	HG6-64-1	BRAF	TP53_mut	LGG	12	17	0.0926008	0.216068	-1.06536	0.665409	0.238888	0.697111	-0.754962	0.156698
Other pharmacogenomic interactions	223	ZSTK474	PI3K (class 1)	BCOR_mut	STAD	3	21	0.0363168	0.216383	-1.21756	0.664778	0.0727066	0.374972	-1.03232	0.426001
Other pharmacogenomic interactions	223	ZSTK474	PI3K (class 1)	loss:cnaSTAD30	STAD	9	21	0.044203	0.216383	-0.977166	0.664778	0.119243	0.374972	-0.738654	0.426001
Other pharmacogenomic interactions	269	NSC-207895	MDM4	TP53_mut	THCA	11	16	0.0721869	0.216561	-0.879105	0.66442	0.00718091	0.0215427	-1.38643	1.6667
Other pharmacogenomic interactions	1527	Pictilisib	PI3K (class 1)	gain:cnaBRCA26 (CDK12,ERBB2,MED24)	BRCA	13	45	0.0194677	0.216579	-0.798987	0.664384	0.0267042	0.333802	-0.795388	0.476511
Other pharmacogenomic interactions	158	PF-562271	FAK, FAK2	CDKN1A_mut	BLCA	3	19	0.0722017	0.216605	-1.27779	0.664331	0.0743163	0.22594	-1.27513	0.646007
Other pharmacogenomic interactions	158	PF-562271	FAK, FAK2	loss:cnaBLCA18 (CHD9,CNOT1,CYLD,MMP2,NUP93)	BLCA	3	19	0.0700242	0.216605	-1.28848	0.664331	0.0753133	0.22594	-1.27046	0.646007
Other pharmacogenomic interactions	158	PF-562271	FAK, FAK2	TP53_mut	BLCA	15	19	0.0489527	0.216605	-1.20527	0.664331	0.0717788	0.22594	-1.08131	0.646007
Other pharmacogenomic interactions	206	Ruxolitinib	JAK1, JAK2	loss:cnaBRCA33	BRCA	6	49	0.0297391	0.216671	-1.10429	0.6642	8.8621e-05	0.00451967	-2.03064	2.34489
Other pharmacogenomic interactions	206	Ruxolitinib	JAK1, JAK2	loss:cnaBRCA20	BRCA	3	49	0.0243229	0.216671	-1.24935	0.6642	0.00652834	0.120917	-1.50072	0.917511
Other pharmacogenomic interactions	206	Ruxolitinib	JAK1, JAK2	loss:cnaBRCA60	BRCA	3	49	0.0225568	0.216671	-1.26752	0.6642	0.0204716	0.149151	-1.2487	0.826375
Other pharmacogenomic interactions	206	Ruxolitinib	JAK1, JAK2	loss:cnaBRCA18	BRCA	16	49	0.0168877	0.216671	-0.804836	0.6642	0.124717	0.425811	-0.510771	0.370783
Other pharmacogenomic interactions	206	Ruxolitinib	JAK1, JAK2	loss:cnaBRCA28 (GPS2)	BRCA	4	49	0.0277028	0.216671	-1.09116	0.6642	0.152815	0.458445	-0.648719	0.338712
Other pharmacogenomic interactions	206	Ruxolitinib	JAK1, JAK2	gain:cnaBRCA13 (FGFR1,WHSC1L1)	BRCA	11	49	0.0222399	0.216671	-0.834655	0.6642	0.880939	0.98449	-0.0779279	0.00678868
Other pharmacogenomic interactions	277	Linifanib	VEGFR1, VEGFR2, VEGFR3, CSF1R, FLT3, KIT	loss:cnaLIHC10 (RB1)	LIHC	3	17	0.0722883	0.216865	-1.28118	0.663811	0.129845	0.389535	-1.06052	0.409454
Other pharmacogenomic interactions	87	GW843682X	PLK1	TP53_mut	LGG	8	11	0.0560817	0.217138	-1.57781	0.663264	0.0321991	0.131109	-1.75504	0.882367
Other pharmacogenomic interactions	1527	Pictilisib	PI3K (class 1)	BRAF_mut	THCA	6	14	0.0723841	0.217152	-1.01095	0.663235	0.0240249	0.0720746	-1.1794	1.14222
Other pharmacogenomic interactions	203	BMS-345541	IKK1, IKK2	loss:cnaKIRC24 (FAT1,IRF2)	KIRC	8	31	0.0724539	0.217362	-0.584806	0.662817	0.300004	0.630009	-0.241586	0.200653
Other pharmacogenomic interactions	202	GSK1904529A	IGF1R, IR	NF1_mut	LGG	3	16	0.155523	0.217733	-0.328152	0.662077	0.742887	0.972686	1.21662	-0.0120273
Other pharmacogenomic interactions	1014	Refametinib	MEK1, MEK2	NRAS_mut	THCA	3	13	0.128285	0.218384	-1.16239	0.660779	0.0790077	0.237023	-1.35084	0.625209
Other pharmacogenomic interactions	1014	Refametinib	MEK1, MEK2	TP53_mut	THCA	9	13	0.145589	0.218384	-0.772146	0.660779	0.366514	0.549772	-0.471427	0.259818
Other pharmacogenomic interactions	328	SNX-2112	HSP90	loss:cnaKIRC7 (CDKN2A)	KIRC	26	30	0.0625163	0.218807	-1.08675	0.659939	0.12216	0.427561	-0.906391	0.369002
Other pharmacogenomic interactions	1199	Tamoxifen	ESR1	MLL2_mut	ESCA	3	34	0.0273641	0.218913	-1.27913	0.659729	0.625101	0.808629	-0.269109	0.0922506
Other pharmacogenomic interactions	254	Quizartinib	FLT3	loss:cnaSTAD30	STAD	9	21	0.0101737	0.219304	-1.08158	0.658953	0.076722	0.527313	-0.51879	0.277932
Other pharmacogenomic interactions	254	Quizartinib	FLT3	loss:cnaSTAD48 (FAT1,IRF2)	STAD	8	21	0.0199368	0.219304	-1.09386	0.658953	0.526738	0.772549	-0.142793	0.112074
Other pharmacogenomic interactions	272	AR-42	HDAC1	loss:cnaKIRC7 (CDKN2A)	KIRC	25	30	0.0692734	0.219366	-0.973491	0.658831	0.0735876	0.199738	-0.954863	0.69954
Other pharmacogenomic interactions	1259	Talazoparib	PARP1, PARP2	gain:cnaCOREAD47 (MYC)	COREAD	6	46	0.00530047	0.21997	-0.710017	0.657637	0.021359	0.552144	-0.5086	0.257948
Other pharmacogenomic interactions	1268	XAV939	TNKS1, TNKS2	NRAS_mut	BLCA	3	18	0.0390091	0.220228	-1.36553	0.657128	0.883932	0.963518	0.0414584	-0.0161404
Other pharmacogenomic interactions	224	AS605240	PI3Kgamma	loss:cnaSTAD30	STAD	9	21	0.0508951	0.22026	-0.904248	0.657064	0.0374218	0.164656	-0.878467	0.783423
Other pharmacogenomic interactions	224	AS605240	PI3Kgamma	loss:cnaSTAD13	STAD	11	21	0.0700827	0.22026	-0.862633	0.657064	0.190695	0.362945	-0.575199	0.440159
Other pharmacogenomic interactions	252	WZ3105	SRC, ROCK2, NTRK2, FLT3, IRAK1, others	loss:cnaOV52	OV	8	32	0.0139869	0.220293	-1.02509	0.657	0.08334	0.734736	-0.719713	0.133868
Other pharmacogenomic interactions	252	WZ3105	SRC, ROCK2, NTRK2, FLT3, IRAK1, others	loss:cnaOV53	OV	8	32	0.0139869	0.220293	-1.02509	0.657	0.08334	0.734736	-0.719713	0.133868
Other pharmacogenomic interactions	253	XMD14-99	ALK, CDK7, LTK, others	loss:cnaGBM101	GBM	5	35	0.120211	0.220387	-0.664166	0.656815	0.404331	0.513189	-0.370624	0.289723
Other pharmacogenomic interactions	290	KIN001-260	IKKB	TP53_mut	THCA	11	16	0.173559	0.220413	-1.15835	0.656763	0.213617	0.278151	-0.548102	0.555719
Other pharmacogenomic interactions	158	PF-562271	FAK, FAK2	gain:cnaESCA11 (CCND1,CTTN)	ESCA	15	26	0.0283934	0.220449	-0.547003	0.656692	0.100876	0.745575	-0.427889	0.127509
Other pharmacogenomic interactions	158	PF-562271	FAK, FAK2	gain:cnaESCA2 (KRAS)	ESCA	3	26	0.0508729	0.220449	-1.06919	0.656692	0.229408	0.745575	-0.644439	0.127509
Other pharmacogenomic interactions	158	PF-562271	FAK, FAK2	gain:cnaESCA3 (KRAS)	ESCA	3	26	0.0508729	0.220449	-1.06919	0.656692	0.229408	0.745575	-0.644439	0.127509
Other pharmacogenomic interactions	1164	XMD8-92	MAPK7	EP300_mut	DLBC	3	13	0.0735009	0.220503	-1.57274	0.656586	0.162426	0.487278	-0.883122	0.312223
Other pharmacogenomic interactions	152	CP466722	ATM	loss:cnaSTAD30	STAD	9	21	0.0100418	0.22092	-1.01014	0.655766	0.0184686	0.40631	-1.02973	0.391142
Other pharmacogenomic interactions	1007	Docetaxel	Microtubule stabiliser	loss:cnaLUSC3	LUSC	6	13	0.0368342	0.221005	-1.32099	0.655597	0.0467244	0.212732	-1.31452	0.672168
Other pharmacogenomic interactions	222	BX-912	PDK1 (PDPK1)	gain:cnaBLCA23 (MYC)	BLCA	4	19	0.092109	0.221062	-0.550046	0.655486	0.309677	0.530875	-0.242065	0.275007
Other pharmacogenomic interactions	221	TAK-715	p38alpha, p38beta	gain:cnaLGG16 (EGFR)	LGG	5	17	0.063213	0.221246	-1.02712	0.655125	0.0258576	0.0607698	-1.25839	1.21631
Other pharmacogenomic interactions	200	Dacinostat	HDAC1	NF1_mut	GBM	6	30	0.0369024	0.221415	-0.97461	0.654794	0.0721411	0.432847	-0.833453	0.363666
Other pharmacogenomic interactions	206	Ruxolitinib	JAK1, JAK2	gain:cnaLUAD5 (CUL2,EPC1)	LUAD	4	61	0.0105451	0.221447	-1.62611	0.65473	0.786931	0.87345	-0.112437	0.0587621
Other pharmacogenomic interactions	299	OSI-027	MTORC1, MTORC2	loss:cnaSTAD13	STAD	11	21	0.0302824	0.222071	-0.978956	0.653509	0.0361179	0.198649	-0.959554	0.701915
Other pharmacogenomic interactions	1199	Tamoxifen	ESR1	CREBBP_mut	DLBC	6	30	0.0370284	0.22217	-1.01551	0.653314	0.0990405	0.594243	-0.759111	0.226036
Other pharmacogenomic interactions	273	CUDC-101	HDAC1-10, EGFR, ERBB2	loss:cnaKIRC16	KIRC	6	30	0.0351122	0.222377	-0.932293	0.65291	0.011985	0.227715	-1.15202	0.642609
Other pharmacogenomic interactions	258	STF-62247	Autophagy inducer	loss:cnaKIRC16	KIRC	6	30	0.0704104	0.222966	-0.959609	0.651761	0.0807682	0.219228	-0.840268	0.659104
Other pharmacogenomic interactions	166	FTI-277	Farnesyl-transferase (FNTA)	B2M_mut	COREAD	8	39	0.0208106	0.22297	-0.849092	0.651753	0.0140842	0.239173	-0.83899	0.621287
Other pharmacogenomic interactions	262	VX-11e	ERK2	CDKN2A_mut	PAAD	4	29	0.024822	0.223398	-1.28538	0.650921	0.073116	0.408817	-0.962057	0.388471
Other pharmacogenomic interactions	310	YM201636	PYKFYVE	CDH1_mut	BRCA	4	49	0.0087626	0.223446	-0.881397	0.650827	0.0152971	0.544754	-0.896529	0.2638
Other pharmacogenomic interactions	1037	BX796	TBK1, PDK1 (PDPK1), IKK, AURKB, AURKC	gain:cnaESCA11 (CCND1,CTTN)	ESCA	14	31	0.0261839	0.223701	-1.10917	0.650332	0.00212563	0.0318845	-1.65665	1.49642
Other pharmacogenomic interactions	1004	Vinblastine	Microtubule destabiliser	loss:cnaSTAD16	STAD	8	22	0.0106546	0.223748	-1.11391	0.650242	0.00503568	0.105749	-1.41655	0.975723
Other pharmacogenomic interactions	283	Omipalisib	PI3K (class 1), MTORC1, MTORC2	loss:cnaSTAD30	STAD	9	21	0.0101848	0.224067	-1.20538	0.649623	0.00337324	0.0742112	-1.4485	1.12953
Other pharmacogenomic interactions	165	DMOG	HIF-PH	loss:cnaBRCA17	BRCA	10	46	0.0197701	0.224181	-0.849689	0.649401	0.00930729	0.206326	-0.965566	0.685446
Other pharmacogenomic interactions	165	DMOG	HIF-PH	loss:cnaBRCA18	BRCA	15	46	0.0145766	0.224181	-0.827782	0.649401	0.0128954	0.206326	-0.807911	0.685446
Other pharmacogenomic interactions	165	DMOG	HIF-PH	gain:cnaBRCA12 (TERT)	BRCA	9	46	0.0233522	0.224181	-0.874438	0.649401	0.0426401	0.255841	-0.795998	0.59203
Other pharmacogenomic interactions	1067	CCT007093	PPM1D	CTCF_mut	UCEC	4	9	0.0160308	0.224431	-1.41409	0.648917	0.0745474	0.347888	-2.7316	0.45856
Other pharmacogenomic interactions	277	Linifanib	VEGFR1, VEGFR2, VEGFR3, CSF1R, FLT3, KIT	loss:cnaLIHC7 (CDKN2A)	LIHC	4	17	0.149689	0.224533	-0.863916	0.648719	0.658091	0.658091	-0.23309	0.181714
Other pharmacogenomic interactions	166	FTI-277	Farnesyl-transferase (FNTA)	loss:cnaKIRC19	KIRC	6	24	0.0591161	0.224641	-0.852422	0.648511	0.191567	0.519967	-0.597046	0.284025
Other pharmacogenomic interactions	177	GSK650394	SGK2, SGK3	NRAS_mut	THCA	3	16	0.0748995	0.224698	-1.38533	0.6484	0.14166	0.424981	-1.14698	0.37163
Other pharmacogenomic interactions	1004	Vinblastine	Microtubule destabiliser	BRAF_mut	SKCM	36	47	0.021411	0.224815	-0.588748	0.648174	0.0621834	0.478005	-0.444741	0.320568
Other pharmacogenomic interactions	1025	SB216763	GSK3A, GSK3B	MLL2_mut	DLBC	8	30	0.0562112	0.224845	-0.790908	0.648117	0.706238	0.814927	-0.219441	0.0888815
Other pharmacogenomic interactions	1067	CCT007093	PPM1D	gain:cnaESCA7 (ERBB2)	ESCA	10	35	0.0281194	0.224956	-0.809216	0.647903	0.63717	0.845997	-0.0274106	0.0726312
Other pharmacogenomic interactions	221	TAK-715	p38alpha, p38beta	loss:cnaBRCA23	BRCA	3	49	0.0132391	0.225065	-1.45206	0.647692	0.0573605	0.456768	-1.02014	0.340304
Other pharmacogenomic interactions	224	AS605240	PI3Kgamma	PIK3CA_mut	STAD	4	21	0.0897575	0.225247	-1.10956	0.647342	0.093644	0.343361	-1.17425	0.464249
Other pharmacogenomic interactions	224	AS605240	PI3Kgamma	loss:cnaSTAD48 (FAT1,IRF2)	STAD	8	21	0.092544	0.225247	-0.845131	0.647342	0.230965	0.362945	-0.549258	0.440159
Other pharmacogenomic interactions	91	GSK319347A	IKK	MLL2_mut	DLBC	9	27	0.0643572	0.22525	-0.802409	0.647335	0.560534	0.953211	0.303334	-0.0208111
Other pharmacogenomic interactions	344	THZ-2-49	CDK9	loss:cnaLGG1 (BNC2,CDKN2A,JAK2,PSIP1)	LGG	9	17	0.032186	0.225302	-1.26158	0.647235	0.141516	0.495306	-0.86745	0.305127
Other pharmacogenomic interactions	64	CMK	RSK2	gain:cnaBRCA15	BRCA	6	12	0.0177059	0.225602	-1.94741	0.646657	0.00791106	0.118666	-2.05654	0.925674
Other pharmacogenomic interactions	64	CMK	RSK2	gain:cnaBRCA14 (RAD21)	BRCA	6	12	0.0300803	0.225602	-1.95292	0.646657	0.0459081	0.344311	-1.80974	0.463049
Other pharmacogenomic interactions	1170	CCT-018159	HSP90	TP53_mut	LGG	12	17	0.22563	0.22563	-0.797135	0.646604	0.51429	0.600005	-0.454451	0.221845
Other pharmacogenomic interactions	223	ZSTK474	PI3K (class 1)	PIK3CA_mut	BRCA	17	49	0.0202814	0.225958	-0.624434	0.645973	0.0189493	0.241604	-0.607408	0.616896
Other pharmacogenomic interactions	223	ZSTK474	PI3K (class 1)	gain:cnaBRCA62	BRCA	10	49	0.0221527	0.225958	-0.905764	0.645973	0.0242668	0.247522	-0.939853	0.606387
Other pharmacogenomic interactions	1029	Motesanib	VEGFR, RET, KIT, PDGFR	loss:cnaGBM45	GBM	3	33	0.109399	0.226092	-1.05838	0.645716	0.982994	0.988564	-0.0600443	0.00499514
Other pharmacogenomic interactions	1009	Tretinoin	Retinoic acid	ARID1B_mut	UCEC	4	8	0.0411567	0.226362	-0.873359	0.645196	0.143762	0.395346	-0.0386283	0.403023
Other pharmacogenomic interactions	228	AKT inhibitor VIII	AKT1, AKT2, AKT3	EP300_mut	DLBC	6	29	0.0283273	0.226618	-1.0426	0.644705	0.00935376	0.0748301	-1.24108	1.12592
Other pharmacogenomic interactions	1067	CCT007093	PPM1D	gain:cnaCOREAD37 (ING1,IRS2,TFDP1)	COREAD	6	45	0.0081917	0.226637	-1.22504	0.644669	0.442756	0.97596	0.0943914	-0.0105681
Other pharmacogenomic interactions	1004	Vinblastine	Microtubule destabiliser	TP53_mut	BLCA	10	14	0.0566611	0.226644	-1.23405	0.644655	0.148278	0.578145	-0.922629	0.237964
Other pharmacogenomic interactions	185	Linsitinib	IGF1R	loss:cnaKIRC3	KIRC	3	24	0.0358138	0.226821	-1.43524	0.644317	0.0809634	0.384576	-0.97517	0.415018
Other pharmacogenomic interactions	185	Linsitinib	IGF1R	loss:cnaKIRC4	KIRC	3	24	0.0358138	0.226821	-1.43524	0.644317	0.0809634	0.384576	-0.97517	0.415018
Other pharmacogenomic interactions	185	Linsitinib	IGF1R	loss:cnaKIRC16	KIRC	3	24	0.0148886	0.226821	-1.56979	0.644317	0.201904	0.767235	-0.668784	0.115071
Other pharmacogenomic interactions	203	BMS-345541	IKK1, IKK2	ASXL1_mut	LAML	5	26	0.075626	0.226878	-1.05186	0.644208	0.0739597	0.221879	-1.07412	0.653883
Other pharmacogenomic interactions	1058	Pictilisib	PI3K (class 1)	PIK3CA_mut	UCEC	4	8	0.0453902	0.226951	-0.240044	0.644068	0.451116	0.787502	0.300446	-0.103748
Other pharmacogenomic interactions	176	IPA-3	PAK1	TP53_mut	LGG	11	16	0.194539	0.226962	-0.685049	0.644046	0.222008	0.228938	-0.58979	0.640283
Other pharmacogenomic interactions	30	Sorafenib	PDGFR, KIT, VEGFR, RAF	SACS_mut	COREAD	3	15	0.0174629	0.227018	-2.23741	0.643939	0.114793	0.746155	-1.25686	0.127171
Other pharmacogenomic interactions	1218	JQ1	BRD2, BRD3, BRD4, BRDT	loss:cnaLUAD25	LUAD	4	61	0.027034	0.227086	-1.1021	0.64381	0.449096	0.843521	-0.555433	0.0739041
Other pharmacogenomic interactions	288	WHI-P97	JAK3	loss:cnaGBM101	GBM	5	35	0.103238	0.227123	-0.778462	0.643738	0.344915	0.632344	-0.386632	0.199047
Other pharmacogenomic interactions	86	A-443654	AKT1, AKT2, AKT3	TP53_mut	LGG	8	11	0.0379296	0.227578	-1.35419	0.64287	0.00740225	0.0444135	-2.14943	1.35249
Other pharmacogenomic interactions	228	AKT inhibitor VIII	AKT1, AKT2, AKT3	BRAF_mut	THCA	7	16	0.0759486	0.227846	-0.952209	0.642359	0.112398	0.337195	-1.00918	0.472119
Other pharmacogenomic interactions	262	VX-11e	ERK2	NRAS_mut	BLCA	3	19	0.0225958	0.227851	-1.6759	0.642349	0.0596927	0.220677	-1.36889	0.656243
Other pharmacogenomic interactions	1502	Bicalutamide	AR	CDK12_mut	COREAD	3	46	0.00549375	0.227991	-1.52303	0.642083	0.591935	0.998387	-0.102831	0.000701014
Other pharmacogenomic interactions	71	Pyrimethamine	Dihydrofolate reductase (DHFR)	loss:cnaSKCM4 (BNC2,CDKN2A,JAK2,PSIP1)	SKCM	11	17	0.050678	0.228051	-0.662574	0.641968	0.056953	0.512577	-0.603949	0.290241
Other pharmacogenomic interactions	71	Pyrimethamine	Dihydrofolate reductase (DHFR)	TP53_mut	SKCM	3	17	0.037006	0.228051	-0.0887294	0.641968	0.190198	0.662121	-0.625867	0.179062
Other pharmacogenomic interactions	157	JNK-9L	JNK2, JNK3	gain:cnaLGG16 (EGFR)	LGG	5	17	0.120927	0.22828	-0.788883	0.641532	0.0186195	0.0651681	-1.37346	1.18596
Other pharmacogenomic interactions	1042	Doramapimod	p38, JNK2	loss:cnaKIRC27	KIRC	3	23	0.0268674	0.228373	-1.09861	0.641355	0.199507	0.423952	0.219847	-0.372684
Other pharmacogenomic interactions	1149	TW 37	BCL2, BCL-XL, MCL1	loss:cnaBLCA5 (FAT1,IRF2)	BLCA	5	19	0.03807	0.22842	-1.1857	0.641266	0.0109507	0.110377	-1.53667	0.957119
Other pharmacogenomic interactions	290	KIN001-260	IKKB	loss:cnaBLCA18 (CHD9,CNOT1,CYLD,MMP2,NUP93)	BLCA	3	19	0.0190653	0.228784	-1.57558	0.640574	0.0133673	0.160408	-1.6924	0.794774
Other pharmacogenomic interactions	1005	Cisplatin	DNA crosslinker	gain:cnaBRCA47 (EGFR)	BRCA	7	45	0.0243499	0.228889	-1.00717	0.640375	0.152404	0.473789	-0.641796	0.324415
Other pharmacogenomic interactions	64	CMK	RSK2	RB1_mut	LGG	5	11	0.152682	0.229022	-0.936534	0.640122	0.0796074	0.159215	-1.18312	0.798017
Other pharmacogenomic interactions	152	CP466722	ATM	loss:cnaKIRC12	KIRC	12	31	0.0654353	0.229023	-0.279605	0.64012	0.188769	0.495518	-0.154668	0.304941
Other pharmacogenomic interactions	152	CP466722	ATM	loss:cnaKIRC13	KIRC	12	31	0.0654353	0.229023	-0.279605	0.64012	0.188769	0.495518	-0.154668	0.304941
Other pharmacogenomic interactions	152	CP466722	ATM	loss:cnaKIRC14	KIRC	12	31	0.0654353	0.229023	-0.279605	0.64012	0.188769	0.495518	-0.154668	0.304941
Other pharmacogenomic interactions	152	CP466722	ATM	loss:cnaKIRC15	KIRC	12	31	0.0654353	0.229023	-0.279605	0.64012	0.188769	0.495518	-0.154668	0.304941
Other pharmacogenomic interactions	152	CP466722	ATM	loss:cnaKIRC23	KIRC	4	31	0.0640725	0.229023	-0.629159	0.64012	0.276302	0.523594	-0.292796	0.281006
Other pharmacogenomic interactions	186	Bexarotene	Retinioic X receptor (RXR) agonist	KDM6A_mut	COREAD	3	38	0.0247607	0.229037	-0.0343941	0.640095	0.463288	0.902193	-0.533669	0.0447006
Other pharmacogenomic interactions	345	KIN001-270	CDK9	CDKN1A_mut	BLCA	3	19	0.0381797	0.229078	-1.35618	0.640016	0.13826	0.414779	-0.952685	0.382183
Other pharmacogenomic interactions	345	KIN001-270	CDK9	loss:cnaBLCA18 (CHD9,CNOT1,CYLD,MMP2,NUP93)	BLCA	3	19	0.0264411	0.229078	-1.46785	0.640016	0.0507058	0.414779	-1.29595	0.382183
Other pharmacogenomic interactions	249	Cabozantinib	VEGFR, MET, RET, KIT, FLT1, FLT3, FLT4, TIE2,AXL	gain:cnaGBM123 (EGFR)	GBM	10	35	0.111096	0.229136	-0.567906	0.639907	0.232461	0.38356	-0.443613	0.416167
Other pharmacogenomic interactions	249	Cabozantinib	VEGFR, MET, RET, KIT, FLT1, FLT3, FLT4, TIE2,AXL	gain:cnaGBM125 (AKAP9)	GBM	9	35	0.109325	0.229136	-0.590058	0.639907	0.263216	0.413624	-0.423196	0.383394
Other pharmacogenomic interactions	1067	CCT007093	PPM1D	ARID1A_mut	PAAD	3	30	0.0764938	0.229481	-1.18646	0.639252	0.423176	0.658555	-0.555438	0.181408
Other pharmacogenomic interactions	1067	CCT007093	PPM1D	CDKN2A_mut	PAAD	4	30	0.0731423	0.229481	-1.03126	0.639252	0.658555	0.658555	-0.260062	0.181408
Other pharmacogenomic interactions	1495	Olaparib	PARP1, PARP2	loss:cnaLUSC3	LUSC	7	15	0.0559642	0.229484	-1.2111	0.639247	0.324565	0.709361	-0.65115	0.149133
Other pharmacogenomic interactions	205	Avagacestat	Amyloid beta20, Amyloid beta40	NRAS_mut	BLCA	3	19	0.0956785	0.229629	-1.0464	0.638974	0.219869	0.623693	-0.797907	0.205029
Other pharmacogenomic interactions	178	BAY-61-3606	SYK	loss:cnaKIRC7 (CDKN2A)	KIRC	19	23	0.102178	0.229901	-0.695147	0.638459	0.0912254	0.273676	-0.663525	0.562763
Other pharmacogenomic interactions	164	JQ12	HDAC1, HDAC2	gain:cnaLGG16 (EGFR)	LGG	5	17	0.0657943	0.23028	-0.980966	0.637744	0.0807714	0.2827	-1.02924	0.548675
Other pharmacogenomic interactions	165	DMOG	HIF-PH	loss:cnaLIHC10 (RB1)	LIHC	3	17	0.0767778	0.230333	-1.11457	0.637643	0.0806084	0.241825	-1.10443	0.616498
Other pharmacogenomic interactions	1025	SB216763	GSK3A, GSK3B	PIK3CA_mut	UCEC	4	8	0.0419233	0.230578	-1.73033	0.637182	0.136053	0.681394	-0.652833	0.166602
Other pharmacogenomic interactions	1194	SB-505124	ALK4, ALK5	loss:cnaESCA1	ESCA	6	34	0.0323959	0.230703	-0.726895	0.636946	0.242014	0.535338	-0.293964	0.271372
Other pharmacogenomic interactions	1194	SB-505124	ALK4, ALK5	loss:cnaESCA5 (PAX5)	ESCA	3	34	0.0432569	0.230703	-1.11979	0.636946	0.236422	0.535338	-0.555832	0.271372
Other pharmacogenomic interactions	1194	SB-505124	ALK4, ALK5	PIK3CA_mut	ESCA	5	34	0.0344562	0.230703	-1.05081	0.636946	0.152731	0.535338	-0.741237	0.271372
Other pharmacogenomic interactions	127	GSK269962A	ROCK1, ROCK2	loss:cnaSKCM4 (BNC2,CDKN2A,JAK2,PSIP1)	SKCM	11	17	0.0256343	0.230709	-1.16941	0.636936	0.0795206	0.529708	-1.00667	0.275964
Other pharmacogenomic interactions	147	NSC-87877	SHP-1 (PTPN6), SHP-2 (PTPN11)	RB1_mut	BLCA	6	19	0.0192275	0.23073	-1.32588	0.636897	0.365501	0.711796	-0.458785	0.147644
Other pharmacogenomic interactions	261	TL-1-85	TAK	loss:cnaKIRC22	KIRC	10	31	0.0738598	0.230795	-0.546683	0.636773	0.0975102	0.279459	-0.434232	0.553682
Other pharmacogenomic interactions	178	BAY-61-3606	SYK	loss:cnaCOREAD11	COREAD	17	38	0.0132312	0.230882	-0.757725	0.63661	0.0190116	0.366086	-0.636406	0.436417
Other pharmacogenomic interactions	178	BAY-61-3606	SYK	loss:cnaCOREAD54 (SMAD4)	COREAD	10	38	0.0100704	0.230882	-0.849563	0.63661	0.0347413	0.428477	-0.640794	0.368073
Other pharmacogenomic interactions	1050	ZM447439	AURKA, AURKB	ATRX_mut	COREAD	3	39	0.0124865	0.231	-1.84696	0.636388	0.0245798	0.363781	-1.68892	0.43916
Other pharmacogenomic interactions	295	NVP-BHG712	EPHB4	BRAF_mut	THCA	7	16	0.114846	0.231153	-1.08256	0.636101	0.0161433	0.04843	-1.6288	1.31489
Other pharmacogenomic interactions	295	NVP-BHG712	EPHB4	TP53_mut	THCA	11	16	0.154102	0.231153	-0.615139	0.636101	0.18514	0.27771	-0.647725	0.556409
Other pharmacogenomic interactions	185	Linsitinib	IGF1R	gain:cnaHNSC14 (ASXL1)	HNSC	6	42	0.0444663	0.231225	-0.9128	0.635965	0.170167	0.715163	-0.628675	0.145595
Other pharmacogenomic interactions	245	UNC0638	G9a and GLP methyltransferases	MKL1_mut	UCEC	3	9	0.0330333	0.231233	-2.19674	0.635951	0.0341222	0.238856	-2.32335	0.621864
Other pharmacogenomic interactions	1175	Rucaparib	PARP1, PARP2	PTEN_mut	DLBC	5	30	0.0289704	0.231763	-1.18799	0.634956	0.303036	0.994979	-0.371584	0.00218592
Other pharmacogenomic interactions	310	YM201636	PYKFYVE	NF1_mut	GBM	8	35	0.112625	0.232289	-0.627171	0.633971	0.937083	0.937083	-0.0673833	0.0282219
Other pharmacogenomic interactions	175	PAC-1	Procaspase-3, Procaspase-7	BRAF_mut	THCA	7	16	0.0774941	0.232482	-0.896246	0.63361	0.102864	0.308592	-0.973764	0.510615
Other pharmacogenomic interactions	300	CX-5461	RNA Polymerase 1	loss:cnaSKCM26	SKCM	3	52	0.00968925	0.232542	-1.04516	0.633499	0.0688243	0.512457	-0.726758	0.290343
Other pharmacogenomic interactions	290	KIN001-260	IKKB	loss:cnaKIRC24 (FAT1,IRF2)	KIRC	8	31	0.0221698	0.232782	-0.915004	0.63305	0.625416	0.923994	-0.146386	0.0343308
Other pharmacogenomic interactions	288	WHI-P97	JAK3	SMARCA4_mut	OV	3	32	0.0196	0.232792	-1.78176	0.633032	0.172532	0.608935	-0.983445	0.215429
Other pharmacogenomic interactions	1006	Cytarabine	Antimetabolite	loss:cnaCOREAD12 (PCDH18)	COREAD	3	42	0.00306458	0.232908	-0.997446	0.632815	0.00882082	0.670383	-0.713805	0.173677
Other pharmacogenomic interactions	1230	IOX2	EGLN1	TP53_mut	LGG	12	17	0.0998245	0.232924	-0.853719	0.632786	0.0727078	0.13184	-0.981412	0.879952
Other pharmacogenomic interactions	156	AZD6482	PI3Kbeta	TP53_mut	DLBC	17	30	0.0582859	0.233144	-0.816887	0.632376	0.199834	0.503334	-0.5529	0.298144
Other pharmacogenomic interactions	254	Quizartinib	FLT3	loss:cnaGBM47	GBM	6	35	0.14838	0.233169	-0.720666	0.632329	0.128177	0.201421	-0.832624	0.695894
Other pharmacogenomic interactions	294	MPS-1-IN-1	MPS1	loss:cnaBLCA18 (CHD9,CNOT1,CYLD,MMP2,NUP93)	BLCA	3	19	0.0776444	0.233332	-1.26243	0.632025	0.0986333	0.394533	-1.18243	0.403916
Other pharmacogenomic interactions	294	MPS-1-IN-1	MPS1	gain:cnaBLCA23 (MYC)	BLCA	4	19	0.034718	0.233332	-1.12363	0.632025	0.153676	0.452637	-0.692658	0.34425
Other pharmacogenomic interactions	294	MPS-1-IN-1	MPS1	TP53_mut	BLCA	15	19	0.0972218	0.233332	-0.983861	0.632025	0.273783	0.452637	-0.622933	0.34425
Other pharmacogenomic interactions	1033	Vismodegib	SMO	EP300_mut	BLCA	3	14	0.0583374	0.23335	-1.30258	0.631993	0.203718	0.649842	-0.974169	0.187192
Other pharmacogenomic interactions	1033	Vismodegib	SMO	NRAS_mut	BLCA	3	14	0.0299455	0.23335	-1.53259	0.631993	0.462151	0.663483	-0.577744	0.17817
Other pharmacogenomic interactions	186	Bexarotene	Retinioic X receptor (RXR) agonist	ITSN1_mut	COREAD	3	38	0.0283877	0.23341	-2.32497	0.63188	0.0607131	0.528628	-1.97715	0.27685
Other pharmacogenomic interactions	1242	(5Z)-7-Oxozeaenol	TAK1	loss:cnaLIHC10 (RB1)	LIHC	3	16	0.163223	0.233464	-0.973338	0.63178	0.0947532	0.14213	-1.17364	0.847315
Other pharmacogenomic interactions	1529	Pevonedistat	NAE	gain:cnaPAAD3	PAAD	4	19	0.0379548	0.233741	-1.57571	0.631264	0.0390204	0.236915	-1.60775	0.625408
Other pharmacogenomic interactions	1047	Nutlin-3a (-)	MDM2	loss:cnaLGG7 (RPL22)	LGG	3	15	0.117051	0.234102	-1.22495	0.630594	0.464747	0.557696	-0.616962	0.253602
Other pharmacogenomic interactions	201	Epothilone B	Microtubule stabiliser	loss:cnaKIRC12	KIRC	6	24	0.0493078	0.234212	-0.574485	0.630391	0.127603	0.404076	-0.326582	0.393537
Other pharmacogenomic interactions	201	Epothilone B	Microtubule stabiliser	loss:cnaKIRC13	KIRC	6	24	0.0493078	0.234212	-0.574485	0.630391	0.127603	0.404076	-0.326582	0.393537
Other pharmacogenomic interactions	201	Epothilone B	Microtubule stabiliser	loss:cnaKIRC14	KIRC	6	24	0.0493078	0.234212	-0.574485	0.630391	0.127603	0.404076	-0.326582	0.393537
Other pharmacogenomic interactions	201	Epothilone B	Microtubule stabiliser	loss:cnaKIRC15	KIRC	6	24	0.0493078	0.234212	-0.574485	0.630391	0.127603	0.404076	-0.326582	0.393537
Other pharmacogenomic interactions	51	Dasatinib	ABL, SRC, Ephrins, PDGFR, KIT	CREBBP_mut	DLBC	6	24	0.0355046	0.234223	-1.15798	0.63037	0.0416944	0.3113	-1.11776	0.506821
Other pharmacogenomic interactions	51	Dasatinib	ABL, SRC, Ephrins, PDGFR, KIT	EP300_mut	DLBC	5	24	0.0878338	0.234223	-0.732597	0.63037	0.145502	0.313591	-0.61368	0.503637
Other pharmacogenomic interactions	1018	Veliparib	PARP1, PARP2	EP300_mut	BLCA	3	14	0.0292879	0.234303	-1.46399	0.630222	0.0847963	0.346343	-1.26274	0.460494
Other pharmacogenomic interactions	1038	NU7441	DNAPK	ARID1A_mut	COREAD	8	41	0.00305737	0.235418	-1.48972	0.628161	0.0101952	0.392514	-1.32789	0.406145
Other pharmacogenomic interactions	1008	Methotrexate	Antimetabolite	NOTCH1_mut	ESCA	4	31	0.0314642	0.235981	-0.659325	0.627123	0.0231099	0.173324	-0.848912	0.761141
Other pharmacogenomic interactions	345	KIN001-270	CDK9	MLL3_mut	BRCA	3	49	0.0046322	0.236242	-1.01541	0.626643	0.00592262	0.302054	-0.881461	0.519916
Other pharmacogenomic interactions	277	Linifanib	VEGFR1, VEGFR2, VEGFR3, CSF1R, FLT3, KIT	loss:cnaGBM100	GBM	3	35	0.0860265	0.236573	-1.16417	0.626035	0.0174944	0.0641461	-1.62061	1.19283
Other pharmacogenomic interactions	277	Linifanib	VEGFR1, VEGFR2, VEGFR3, CSF1R, FLT3, KIT	loss:cnaGBM102	GBM	3	35	0.0860265	0.236573	-1.16417	0.626035	0.0174944	0.0641461	-1.62061	1.19283
Other pharmacogenomic interactions	277	Linifanib	VEGFR1, VEGFR2, VEGFR3, CSF1R, FLT3, KIT	loss:cnaGBM103	GBM	3	35	0.0860265	0.236573	-1.16417	0.626035	0.0174944	0.0641461	-1.62061	1.19283
Other pharmacogenomic interactions	277	Linifanib	VEGFR1, VEGFR2, VEGFR3, CSF1R, FLT3, KIT	loss:cnaGBM104	GBM	3	35	0.0860265	0.236573	-1.16417	0.626035	0.0174944	0.0641461	-1.62061	1.19283
Other pharmacogenomic interactions	277	Linifanib	VEGFR1, VEGFR2, VEGFR3, CSF1R, FLT3, KIT	loss:cnaGBM105	GBM	3	35	0.0860265	0.236573	-1.16417	0.626035	0.0174944	0.0641461	-1.62061	1.19283
Other pharmacogenomic interactions	277	Linifanib	VEGFR1, VEGFR2, VEGFR3, CSF1R, FLT3, KIT	loss:cnaGBM106	GBM	3	35	0.0860265	0.236573	-1.16417	0.626035	0.0174944	0.0641461	-1.62061	1.19283
Other pharmacogenomic interactions	277	Linifanib	VEGFR1, VEGFR2, VEGFR3, CSF1R, FLT3, KIT	loss:cnaGBM97	GBM	3	35	0.0860265	0.236573	-1.16417	0.626035	0.0174944	0.0641461	-1.62061	1.19283
Other pharmacogenomic interactions	277	Linifanib	VEGFR1, VEGFR2, VEGFR3, CSF1R, FLT3, KIT	loss:cnaGBM98	GBM	3	35	0.0860265	0.236573	-1.16417	0.626035	0.0174944	0.0641461	-1.62061	1.19283
Other pharmacogenomic interactions	277	Linifanib	VEGFR1, VEGFR2, VEGFR3, CSF1R, FLT3, KIT	loss:cnaGBM99 (ANK3)	GBM	3	35	0.0860265	0.236573	-1.16417	0.626035	0.0174944	0.0641461	-1.62061	1.19283
Other pharmacogenomic interactions	277	Linifanib	VEGFR1, VEGFR2, VEGFR3, CSF1R, FLT3, KIT	gain:cnaGBM123 (EGFR)	GBM	10	35	0.016551	0.236573	-0.97245	0.626035	0.0563521	0.185962	-0.761469	0.730576
Other pharmacogenomic interactions	277	Linifanib	VEGFR1, VEGFR2, VEGFR3, CSF1R, FLT3, KIT	gain:cnaGBM124	GBM	4	35	0.0254619	0.236573	-1.30239	0.626035	0.216708	0.401576	-0.720137	0.396233
Other pharmacogenomic interactions	330	XMD13-2	RIPK1	loss:cnaKIRC24 (FAT1,IRF2)	KIRC	8	31	0.0338091	0.236664	-0.885325	0.625868	0.270933	0.856891	-0.407177	0.0670745
Other pharmacogenomic interactions	298	OSI-930	KIT	NRAS_mut	BLCA	3	19	0.0394925	0.236955	-1.25067	0.625334	0.135023	0.540091	-0.977233	0.267533
Other pharmacogenomic interactions	193	GW-2580	CSF1R	RB1_mut	LGG	7	17	0.112954	0.237087	-0.853626	0.625092	0.0496726	0.0869271	-1.09654	1.06085
Other pharmacogenomic interactions	193	GW-2580	CSF1R	TP53_mut	LGG	12	17	0.135478	0.237087	-0.849656	0.625092	0.340912	0.340912	-0.32149	0.467358
Other pharmacogenomic interactions	1161	ZG-10	JNK1	TP53_mut	GBM	13	18	0.0431389	0.237264	-1.16548	0.624768	0.0115651	0.127216	-1.47666	0.895459
Other pharmacogenomic interactions	134	Etoposide	TOP2	gain:cnaPAAD3	PAAD	4	30	0.0454887	0.237294	-1.33593	0.624713	0.023176	0.208584	-1.48853	0.680719
Other pharmacogenomic interactions	304	SB52334	ALK5	MLL3_mut	BRCA	3	49	0.00931958	0.237649	-1.04332	0.624063	0.00746003	0.190231	-1.09207	0.720719
Other pharmacogenomic interactions	345	KIN001-270	CDK9	loss:cnaHNSC3	HNSC	3	40	0.00951109	0.237777	-1.66075	0.62383	0.0850578	0.903449	-1.10816	0.0440965
Other pharmacogenomic interactions	140	Vinorelbine	Microtubule destabiliser	loss:cnaBRCA25 (ARID1B,MAP3K4,MLLT4)	BRCA	5	47	0.0320011	0.238074	-0.921439	0.623288	0.0221382	0.325681	-0.979269	0.487208
Other pharmacogenomic interactions	140	Vinorelbine	Microtubule destabiliser	gain:cnaBRCA47 (EGFR)	BRCA	7	47	0.0347191	0.238074	-0.755791	0.623288	0.0834721	0.428911	-0.586774	0.367633
Other pharmacogenomic interactions	1049	PD173074	FGFR1, FGFR3	TP53_mut	SKCM	14	43	0.0226989	0.238339	-0.625839	0.622806	0.0353659	0.247561	-0.477315	0.606318
Other pharmacogenomic interactions	163	JQ1	BRD2, BRD3, BRD4, BRDT	gain:cnaESCA2 (KRAS)	ESCA	3	27	0.0340615	0.238431	-0.986398	0.622638	0.0155032	0.108522	-1.18971	0.964481
Other pharmacogenomic interactions	163	JQ1	BRD2, BRD3, BRD4, BRDT	gain:cnaESCA3 (KRAS)	ESCA	3	27	0.0340615	0.238431	-0.986398	0.622638	0.0155032	0.108522	-1.18971	0.964481
Other pharmacogenomic interactions	310	YM201636	PYKFYVE	loss:cnaSTAD30	STAD	9	21	0.0216804	0.238485	-1.32689	0.622539	0.0689428	0.310559	-1.07002	0.507855
Other pharmacogenomic interactions	208	Ispinesib Mesylate	KSP	gain:cnaBLCA23 (MYC)	BLCA	4	19	0.0397822	0.238693	-1.11994	0.62216	0.11434	0.421628	-0.841597	0.37507
Other pharmacogenomic interactions	260	NG-25	TAK1, MAP4K2	loss:cnaKIRC16	KIRC	6	31	0.124383	0.238709	-0.582295	0.622131	0.0928967	0.199097	-0.605884	0.700936
Other pharmacogenomic interactions	260	NG-25	TAK1, MAP4K2	loss:cnaKIRC3	KIRC	3	31	0.125038	0.238709	-0.730388	0.622131	0.0919972	0.199097	-0.755626	0.700936
Other pharmacogenomic interactions	260	NG-25	TAK1, MAP4K2	loss:cnaKIRC4	KIRC	3	31	0.125038	0.238709	-0.730388	0.622131	0.0919972	0.199097	-0.755626	0.700936
Other pharmacogenomic interactions	1022	AZD7762	CHEK1, CHEK2	ASXL1_mut	LAML	5	24	0.0673646	0.239463	-0.965155	0.620762	0.0613146	0.183944	-1.02159	0.735315
Other pharmacogenomic interactions	196	Phenformin	Biguanide agent	BRAF_mut	THCA	7	16	0.0798607	0.239582	-0.984726	0.620546	0.176923	0.530769	-0.910853	0.275094
Other pharmacogenomic interactions	1372	Trametinib	MEK1, MEK2	MLL2_mut	LUSC	3	15	0.134636	0.23963	-0.217337	0.620459	0.0879966	0.143994	-0.189036	0.841654
Other pharmacogenomic interactions	199	Pazopanib	CSF1R, KIT, PDGFRA, PDGFRB	gain:cnaGBM122	GBM	7	29	0.0226949	0.239718	-0.881267	0.620299	0.247001	0.766239	-0.412764	0.115636
Other pharmacogenomic interactions	199	Pazopanib	CSF1R, KIT, PDGFRA, PDGFRB	gain:cnaGBM124	GBM	3	29	0.0206839	0.239718	-1.57039	0.620299	0.369075	0.766239	-0.695989	0.115636
Other pharmacogenomic interactions	199	Pazopanib	CSF1R, KIT, PDGFRA, PDGFRB	gain:cnaGBM125 (AKAP9)	GBM	6	29	0.0420451	0.239718	-1.12164	0.620299	0.0493748	0.766239	-1.07496	0.115636
Other pharmacogenomic interactions	199	Pazopanib	CSF1R, KIT, PDGFRA, PDGFRB	RB1_mut	GBM	5	29	0.0439607	0.239718	-0.973379	0.620299	0.508416	0.766239	-0.338623	0.115636
Other pharmacogenomic interactions	249	Cabozantinib	VEGFR, MET, RET, KIT, FLT1, FLT3, FLT4, TIE2,AXL	loss:cnaSTAD13	STAD	11	21	0.0435933	0.239763	-1.0337	0.620217	0.0684853	0.251113	-0.876139	0.600131
Other pharmacogenomic interactions	1043	JNK Inhibitor VIII	JNK	KRAS_mut	LUAD	17	54	0.00666248	0.239849	-0.847242	0.620061	0.0161707	0.582146	-0.732345	0.234968
Other pharmacogenomic interactions	286	KIN001-236	Angiopoietin-1 receptor	gain:cnaLUSC30	LUSC	3	14	0.120071	0.240142	-0.998999	0.619532	0.253171	0.450081	-0.726762	0.346709
Other pharmacogenomic interactions	286	KIN001-236	Angiopoietin-1 receptor	gain:cnaLUSC32 (BCL11A,REL,XPO1)	LUSC	3	14	0.120071	0.240142	-0.998999	0.619532	0.253171	0.450081	-0.726762	0.346709
Other pharmacogenomic interactions	299	OSI-027	MTORC1, MTORC2	loss:cnaSTAD48 (FAT1,IRF2)	STAD	8	21	0.0460056	0.240313	-0.840702	0.619223	0.00689219	0.151628	-1.13775	0.81922
Other pharmacogenomic interactions	299	OSI-027	MTORC1, MTORC2	loss:cnaSTAD12	STAD	4	21	0.0546166	0.240313	-1.14093	0.619223	0.0153177	0.168495	-1.38322	0.773412
Other pharmacogenomic interactions	211	TL-2-105	not defined	loss:cnaSTAD30	STAD	9	21	0.032807	0.240585	-0.812774	0.618732	0.0605003	0.362239	-0.641981	0.441004
Other pharmacogenomic interactions	1268	XAV939	TNKS1, TNKS2	MECOM_mut	SKCM	3	54	0.0200778	0.240933	-0.781353	0.618103	0.0210149	0.504358	-1.24239	0.297261
Other pharmacogenomic interactions	1268	XAV939	TNKS1, TNKS2	loss:cnaSKCM4 (BNC2,CDKN2A,JAK2,PSIP1)	SKCM	38	54	0.0123448	0.240933	-0.70229	0.618103	0.241683	0.626835	-0.314945	0.202847
Other pharmacogenomic interactions	341	Selisistat	SIRT1	loss:cnaBRCA25 (ARID1B,MAP3K4,MLLT4)	BRCA	6	49	0.00472946	0.241203	-1.24538	0.617618	0.00480183	0.244893	-1.00576	0.611023
Other pharmacogenomic interactions	328	SNX-2112	HSP90	BRAF_mut	THCA	6	15	0.11003	0.241519	-1.31412	0.617048	0.118404	0.289869	-0.739551	0.537799
Other pharmacogenomic interactions	328	SNX-2112	HSP90	TP53_mut	THCA	11	15	0.161013	0.241519	-0.429445	0.617048	0.193246	0.289869	-1.1049	0.537799
Other pharmacogenomic interactions	1373	Dabrafenib	BRAF	loss:cnaLGG1 (BNC2,CDKN2A,JAK2,PSIP1)	LGG	9	16	0.0927825	0.242194	-1.01219	0.615838	0.292142	0.511248	-0.595497	0.291368
Other pharmacogenomic interactions	1373	Dabrafenib	BRAF	NF1_mut	LGG	3	16	0.103797	0.242194	-0.570514	0.615838	0.531472	0.620051	-0.224698	0.207573
Other pharmacogenomic interactions	272	AR-42	HDAC1	gain:cnaESCA7 (ERBB2)	ESCA	10	35	0.0454732	0.242524	-0.727753	0.615246	0.114818	0.45927	-0.567157	0.337932
Other pharmacogenomic interactions	178	BAY-61-3606	SYK	ASH1L_mut	BRCA	3	48	0.0047665	0.243091	-1.57747	0.61423	0.039075	0.50966	-1.27114	0.292719
Other pharmacogenomic interactions	275	I-BET-762	BRD2, BRD3, BRD4	CDKN2A_mut	PAAD	4	29	0.0270247	0.243223	-1.21117	0.613996	0.0488499	0.439649	-1.00627	0.356894
Other pharmacogenomic interactions	206	Ruxolitinib	JAK1, JAK2	loss:cnaSTAD17 (CDKN2A)	STAD	8	21	0.0171615	0.243415	-0.866763	0.613654	0.0264679	0.582294	-0.680885	0.234858
Other pharmacogenomic interactions	206	Ruxolitinib	JAK1, JAK2	loss:cnaSTAD12	STAD	4	21	0.022554	0.243415	-1.28236	0.613654	0.146548	0.975564	-0.805408	0.0107442
Other pharmacogenomic interactions	206	Ruxolitinib	JAK1, JAK2	loss:cnaSTAD42	STAD	4	21	0.0331929	0.243415	-1.36602	0.613654	0.490734	0.975564	-0.444078	0.0107442
Other pharmacogenomic interactions	346	THZ-2-102-1	CDK7	PIK3CA_mut	OV	6	32	0.0966651	0.243596	-0.537159	0.61333	0.0531427	0.258058	-0.59217	0.588283
Other pharmacogenomic interactions	346	THZ-2-102-1	CDK7	gain:cnaOV51 (MYC)	OV	8	32	0.0942222	0.243596	-0.758703	0.61333	0.123238	0.3235	-0.714273	0.490125
Other pharmacogenomic interactions	1129	PF-4708671	S6K1	gain:cnaOV48 (SOX17)	OV	3	32	0.0036967	0.243982	-1.91083	0.612642	0.121772	0.356825	-0.839249	0.447545
Other pharmacogenomic interactions	1241	CHIR-99021	GSK3A, GSK3B	NOTCH1_mut	ESCA	4	33	0.0305791	0.244633	-0.756735	0.611486	0.115106	0.460423	-0.69594	0.336843
Other pharmacogenomic interactions	179	5-Fluorouracil	Antimetabolite (DNA & RNA)	loss:cnaDLBC2	DLBC	4	29	0.0630808	0.245152	-1.09747	0.610565	0.0590635	0.236254	-1.13494	0.626621
Other pharmacogenomic interactions	179	5-Fluorouracil	Antimetabolite (DNA & RNA)	loss:cnaDLBC4 (CDKN2A)	DLBC	7	29	0.0919318	0.245152	-0.334296	0.610565	0.0953886	0.25437	-0.331291	0.594535
Other pharmacogenomic interactions	106	XMD8-85	ERK5, BET	loss:cnaCOREAD65	COREAD	9	15	0.0377565	0.245418	-1.64467	0.610094	0.0150226	0.207403	-1.67542	0.683185
Other pharmacogenomic interactions	106	XMD8-85	ERK5, BET	SACS_mut	COREAD	3	15	0.0328036	0.245418	-1.89137	0.610094	0.0654271	0.340221	-1.55432	0.468239
Other pharmacogenomic interactions	228	AKT inhibitor VIII	AKT1, AKT2, AKT3	loss:cnaGBM2 (CDKN2A)	GBM	26	35	0.119002	0.245441	-0.68371	0.610053	0.296285	0.474652	-0.475056	0.323624
Other pharmacogenomic interactions	255	CP724714	ERBB2	loss:cnaLUAD2 (PAX5)	LUAD	5	61	0.017538	0.245533	-0.838529	0.609891	0.0273036	0.299379	-0.685954	0.523779
Other pharmacogenomic interactions	308	WIKI4	TNKS1, TNKS2	gain:cnaSTAD45 (MET)	STAD	3	21	0.0216429	0.245628	-1.23056	0.609723	0.0519051	0.228382	-1.23305	0.641337
Other pharmacogenomic interactions	308	WIKI4	TNKS1, TNKS2	loss:cnaSTAD12	STAD	4	21	0.0334947	0.245628	-1.12295	0.609723	0.0147558	0.228382	-1.3772	0.641337
Other pharmacogenomic interactions	177	GSK650394	SGK2, SGK3	ASH1L_mut	BRCA	3	47	0.0101526	0.245994	-1.93918	0.609075	0.0304549	0.420688	-1.71225	0.376039
Other pharmacogenomic interactions	177	GSK650394	SGK2, SGK3	gain:cnaBRCA27 (CLTC,PPM1D)	BRCA	9	47	0.0142351	0.245994	-0.831122	0.609075	0.0779028	0.506573	-0.527271	0.295358
Other pharmacogenomic interactions	177	GSK650394	SGK2, SGK3	gain:cnaBLCA23 (MYC)	BLCA	4	19	0.0205484	0.246581	-1.24777	0.60804	0.0248646	0.298375	-1.18547	0.525238
Other pharmacogenomic interactions	303	PIK-93	PI3Kgamma	NF1_mut	GBM	8	35	0.0074788	0.2468	-1.04738	0.607654	0.0118483	0.390993	-1.15564	0.407831
Other pharmacogenomic interactions	310	YM201636	PYKFYVE	loss:cnaGBM134	GBM	3	35	0.134727	0.247	-0.742859	0.607302	0.337448	0.506171	-0.408113	0.295702
Other pharmacogenomic interactions	310	YM201636	PYKFYVE	loss:cnaGBM135	GBM	3	35	0.134727	0.247	-0.742859	0.607302	0.337448	0.506171	-0.408113	0.295702
Other pharmacogenomic interactions	1218	JQ1	BRD2, BRD3, BRD4, BRDT	MLL2_mut	ESCA	3	33	0.0617737	0.247095	-1.09835	0.607136	0.962334	0.972241	-0.0202002	0.0122259
Other pharmacogenomic interactions	1060	PD0325901	MEK1, MEK2	NRAS_mut	THCA	3	13	0.101205	0.247161	-1.17778	0.60702	0.0904804	0.271441	-1.17983	0.566324
Other pharmacogenomic interactions	1060	PD0325901	MEK1, MEK2	TP53_mut	THCA	9	13	0.164774	0.247161	-0.628818	0.60702	0.229903	0.344855	-0.488083	0.462364
Other pharmacogenomic interactions	1262	UNC1215	L3MBTL3	loss:cnaKIRC12	KIRC	13	30	0.0619803	0.247921	-0.652525	0.605687	0.754286	0.951753	0.346922	-0.0214759
Other pharmacogenomic interactions	1262	UNC1215	L3MBTL3	loss:cnaKIRC13	KIRC	13	30	0.0619803	0.247921	-0.652525	0.605687	0.754286	0.951753	0.346922	-0.0214759
Other pharmacogenomic interactions	1262	UNC1215	L3MBTL3	loss:cnaKIRC14	KIRC	13	30	0.0619803	0.247921	-0.652525	0.605687	0.754286	0.951753	0.346922	-0.0214759
Other pharmacogenomic interactions	1262	UNC1215	L3MBTL3	loss:cnaKIRC15	KIRC	13	30	0.0619803	0.247921	-0.652525	0.605687	0.754286	0.951753	0.346922	-0.0214759
Other pharmacogenomic interactions	1262	UNC1215	L3MBTL3	loss:cnaKIRC22	KIRC	10	30	0.0584218	0.247921	-0.746758	0.605687	0.597434	0.951753	0.343676	-0.0214759
Other pharmacogenomic interactions	328	SNX-2112	HSP90	loss:cnaCOREAD65	COREAD	27	46	0.0366047	0.247922	-0.965625	0.605685	0.220996	0.654664	-0.680728	0.183982
Other pharmacogenomic interactions	163	JQ1	BRD2, BRD3, BRD4, BRDT	TP53_mut	LGG	12	17	0.10629	0.24801	-0.572148	0.605531	0.0223023	0.0520388	-0.970111	1.28367
Other pharmacogenomic interactions	346	THZ-2-102-1	CDK7	gain:cnaESCA9 (EGFR)	ESCA	8	35	0.0465353	0.248188	-0.841996	0.605219	0.122472	0.489889	-0.686271	0.309902
Other pharmacogenomic interactions	1009	Tretinoin	Retinoic acid	loss:cnaSKCM5 (PAX5)	SKCM	4	47	0.0612288	0.248189	-0.988406	0.605217	0.0168308	0.342509	-1.29083	0.465328
Other pharmacogenomic interactions	1009	Tretinoin	Retinoic acid	loss:cnaSKCM22	SKCM	7	47	0.077323	0.248189	-0.879366	0.605217	0.136171	0.7149	-0.765202	0.145755
Other pharmacogenomic interactions	1009	Tretinoin	Retinoic acid	loss:cnaSKCM23	SKCM	4	47	0.0945482	0.248189	-0.988349	0.605217	0.127102	0.7149	-0.913628	0.145755
Other pharmacogenomic interactions	1009	Tretinoin	Retinoic acid	loss:cnaSKCM26	SKCM	3	47	0.0718405	0.248189	-0.542225	0.605217	0.180859	0.759607	-0.459951	0.119411
Other pharmacogenomic interactions	1009	Tretinoin	Retinoic acid	loss:cnaSKCM24	SKCM	8	47	0.0938597	0.248189	-0.708882	0.605217	0.601387	0.884705	-0.247413	0.0532017
Other pharmacogenomic interactions	1009	Tretinoin	Retinoic acid	loss:cnaSKCM25	SKCM	8	47	0.0938597	0.248189	-0.708882	0.605217	0.601387	0.884705	-0.247413	0.0532017
Other pharmacogenomic interactions	64	CMK	RSK2	gain:cnaBRCA16	BRCA	3	12	0.0827893	0.248368	-1.04415	0.604904	0.121134	0.401421	-0.937855	0.3964
Other pharmacogenomic interactions	271	VNLG/124	HDAC,RAR	loss:cnaHNSC11 (CDKN2A)	HNSC	14	40	0.0224558	0.248448	-0.806771	0.604764	0.0728958	0.553502	-0.594348	0.256881
Other pharmacogenomic interactions	271	VNLG/124	HDAC,RAR	loss:cnaHNSC32 (FAT1)	HNSC	13	40	0.0298138	0.248448	-0.786478	0.604764	0.0603597	0.553502	-0.599319	0.256881
Other pharmacogenomic interactions	1262	UNC1215	L3MBTL3	ARID1A_mut	BLCA	4	18	0.135817	0.248998	-0.880926	0.603805	0.0371281	0.408409	1.34246	-0.388904
Other pharmacogenomic interactions	308	WIKI4	TNKS1, TNKS2	loss:cnaGBM101	GBM	5	35	0.143626	0.249456	-0.706003	0.603006	0.153124	0.280728	-0.709905	0.551714
Other pharmacogenomic interactions	86	A-443654	AKT1, AKT2, AKT3	loss:cnaKIRC12	KIRC	4	11	0.0767915	0.249572	-0.558237	0.602803	0.200903	0.652933	-0.130045	0.185131
Other pharmacogenomic interactions	86	A-443654	AKT1, AKT2, AKT3	loss:cnaKIRC13	KIRC	4	11	0.0767915	0.249572	-0.558237	0.602803	0.200903	0.652933	-0.130045	0.185131
Other pharmacogenomic interactions	86	A-443654	AKT1, AKT2, AKT3	loss:cnaKIRC14	KIRC	4	11	0.0767915	0.249572	-0.558237	0.602803	0.200903	0.652933	-0.130045	0.185131
Other pharmacogenomic interactions	86	A-443654	AKT1, AKT2, AKT3	loss:cnaKIRC15	KIRC	4	11	0.0767915	0.249572	-0.558237	0.602803	0.200903	0.652933	-0.130045	0.185131
Other pharmacogenomic interactions	310	YM201636	PYKFYVE	loss:cnaSTAD13	STAD	11	21	0.0340434	0.249652	-1.19503	0.602666	0.0850085	0.310559	-0.975347	0.507855
Other pharmacogenomic interactions	1052	RO-3306	CDK1	gain:cnaBLCA23 (MYC)	BLCA	3	15	0.0227218	0.249939	-1.41847	0.602166	0.0896974	0.493336	-0.987844	0.306857
Other pharmacogenomic interactions	1019	Bosutinib	SRC, ABL, TEC	CDKN2A_mut	PAAD	3	25	0.100089	0.250223	-1.04523	0.601673	0.454078	0.63413	-0.432355	0.197822
Other pharmacogenomic interactions	1170	CCT-018159	HSP90	TP53_mut	PAAD	24	29	0.139077	0.250338	-0.670828	0.601473	0.102282	0.153423	-0.812795	0.81411
Other pharmacogenomic interactions	1066	AZD6482	PI3Kbeta	gain:cnaBRCA39 (FOXA1,NKX2-1,PSMA6)	BRCA	5	43	0.0102222	0.250445	-1.2514	0.601288	0.00830334	0.203432	-1.28351	0.691581
Other pharmacogenomic interactions	253	XMD14-99	ALK, CDK7, LTK, others	NCOR1_mut	COREAD	7	46	0.00284975	0.250778	-1.17654	0.60071	0.0130115	0.605269	-1.10756	0.218052
Other pharmacogenomic interactions	38	Saracatinib	ABL, SRC	NOTCH1_mut	ESCA	3	11	0.167215	0.250823	-1.20934	0.600632	0.177095	0.265642	-1.14348	0.575703
Other pharmacogenomic interactions	1028	VX-702	p38	gain:cnaLGG16 (EGFR)	LGG	5	15	0.0418766	0.251259	-1.27434	0.599878	0.0064813	0.0388878	-1.59637	1.41019
Other pharmacogenomic interactions	1262	UNC1215	L3MBTL3	gain:cnaLGG16 (EGFR)	LGG	5	17	0.107821	0.251583	-0.950866	0.599319	0.00325451	0.0227816	-1.94896	1.64242
Other pharmacogenomic interactions	1262	UNC1215	L3MBTL3	TP53_mut	LGG	12	17	0.0731358	0.251583	-1.07875	0.599319	0.290264	0.338641	-0.5775	0.47026
Other pharmacogenomic interactions	1053	MK-2206	AKT1, AKT2	loss:cnaCOREAD49	COREAD	14	41	0.00327124	0.251885	-1.0833	0.598797	0.0108547	0.439123	-1.0002	0.357413
Other pharmacogenomic interactions	176	IPA-3	PAK1	loss:cnaLIHC10 (RB1)	LIHC	3	17	0.16801	0.252014	-0.892242	0.598575	0.131946	0.231677	-1.00793	0.635117
Other pharmacogenomic interactions	153	Midostaurin	PKC, PPK, FLT1, c-FGR, others	CDKN2A_mut	PAAD	4	30	0.0840208	0.252062	-0.978719	0.598492	0.146391	0.439172	-0.819151	0.357366
Other pharmacogenomic interactions	1019	Bosutinib	SRC, ABL, TEC	gain:cnaCOREAD31	COREAD	6	43	0.00630381	0.252153	-1.14866	0.598337	0.0451036	0.537959	-0.732625	0.269251
Other pharmacogenomic interactions	272	AR-42	HDAC1	loss:cnaCOREAD48	COREAD	6	45	0.060228	0.252384	-0.564474	0.597938	0.0184744	0.135159	-0.778774	0.869156
Other pharmacogenomic interactions	1019	Bosutinib	SRC, ABL, TEC	TP53_mut	BLCA	10	14	0.0632172	0.252869	-1.03901	0.597105	0.022378	0.179024	-1.44741	0.747089
Other pharmacogenomic interactions	1019	Bosutinib	SRC, ABL, TEC	RB1_mut	BLCA	5	14	0.0445193	0.252869	-1.108	0.597105	0.354726	0.704363	-0.51614	0.152203
Other pharmacogenomic interactions	211	TL-2-105	not defined	gain:cnaBRCA19	BRCA	4	49	0.00992883	0.253185	-1.19288	0.596562	0.00843036	0.168154	-1.30329	0.774293
Other pharmacogenomic interactions	1142	HG-5-113-01	LOK, LTK, TRCB, ABL(T315I)	gain:cnaBLCA15 (ASXL1)	BLCA	3	7	0.253369	0.253369	-1.48379	0.596247	0.191875	0.191875	-1.76271	0.716982
Other pharmacogenomic interactions	230	GSK429286A	ROCK1, ROCK2	loss:cnaOV41	OV	5	32	0.0362401	0.253681	-1.1565	0.595712	0.579981	0.85541	-0.19054	0.0678256
Other pharmacogenomic interactions	147	NSC-87877	SHP-1 (PTPN6), SHP-2 (PTPN11)	SOX9_mut	COREAD	4	39	0.0161713	0.253682	-1.56571	0.595711	0.128447	0.932068	-1.09197	0.0305525
Other pharmacogenomic interactions	1038	NU7441	DNAPK	FBXW7_mut	COREAD	10	41	0.00659691	0.253981	-1.20098	0.595199	0.0429046	0.825913	-0.840054	0.0830658
Other pharmacogenomic interactions	185	Linsitinib	IGF1R	loss:cnaBRCA36 (FAT1,IRF2)	BRCA	9	48	0.00498243	0.254104	-1.08405	0.594988	0.164854	0.814442	-0.571606	0.0891396
Other pharmacogenomic interactions	1199	Tamoxifen	ESR1	loss:cnaESCA14	ESCA	10	34	0.0476485	0.254125	-0.844084	0.594952	0.241874	0.808629	-0.505885	0.0922506
Other pharmacogenomic interactions	277	Linifanib	VEGFR1, VEGFR2, VEGFR3, CSF1R, FLT3, KIT	ASXL1_mut	LAML	5	26	0.084742	0.254226	-1.08416	0.59478	0.235073	0.43145	-0.760714	0.36507
Other pharmacogenomic interactions	194	Luminespib	HSP90	gain:cnaPAAD3	PAAD	4	30	0.113018	0.25429	-0.708134	0.594671	0.121236	0.272781	-0.717267	0.564186
Other pharmacogenomic interactions	1262	UNC1215	L3MBTL3	loss:cnaOV61	OV	3	33	0.0269714	0.254302	-1.42597	0.59465	0.0781252	0.516331	1.23648	-0.287072
Other pharmacogenomic interactions	1262	UNC1215	L3MBTL3	loss:cnaOV62	OV	3	33	0.0269714	0.254302	-1.42597	0.59465	0.0781252	0.516331	1.23648	-0.287072
Other pharmacogenomic interactions	1262	UNC1215	L3MBTL3	loss:cnaOV63	OV	3	33	0.0269714	0.254302	-1.42597	0.59465	0.0781252	0.516331	1.23648	-0.287072
Other pharmacogenomic interactions	309	Y-39983	ROCK	KRAS_mut	LAML	3	25	0.127306	0.254612	-1.08705	0.594121	0.0762697	0.152539	-1.21612	0.816618
Other pharmacogenomic interactions	1069	EHT-1864	RAC1, RAC2, RAC3	loss:cnaHNSC26	HNSC	14	41	0.019587	0.254631	-0.749628	0.594089	0.157116	0.670959	-0.495347	0.173304
Other pharmacogenomic interactions	279	BIX02189	MEK5, ERK5	loss:cnaOV41	OV	5	32	0.0404339	0.254734	-1.13311	0.593913	0.0108466	0.113889	-1.36427	0.943518
Other pharmacogenomic interactions	279	BIX02189	MEK5, ERK5	loss:cnaOV42	OV	4	32	0.0391772	0.254734	-1.27285	0.593913	0.0232703	0.183254	-1.39084	0.736947
Other pharmacogenomic interactions	279	BIX02189	MEK5, ERK5	loss:cnaOV82	OV	3	32	0.022469	0.254734	-1.61843	0.593913	0.0362498	0.253749	-1.53458	0.595596
Other pharmacogenomic interactions	279	BIX02189	MEK5, ERK5	loss:cnaOV36	OV	3	32	0.0277225	0.254734	-1.56011	0.593913	0.0478024	0.273777	-1.45419	0.562603
Other pharmacogenomic interactions	279	BIX02189	MEK5, ERK5	TP53_mut	OV	22	32	0.033473	0.254734	-0.722382	0.593913	0.0463342	0.273777	-0.574449	0.562603
Other pharmacogenomic interactions	219	AT-7519	CDK1, CDK2, CDK4, CDK6, CDK9	CDKN1A_mut	BLCA	3	19	0.0916051	0.254897	-1.201	0.593635	0.0820661	0.246198	-1.23189	0.608715
Other pharmacogenomic interactions	219	AT-7519	CDK1, CDK2, CDK4, CDK6, CDK9	loss:cnaBLCA18 (CHD9,CNOT1,CYLD,MMP2,NUP93)	BLCA	3	19	0.0759943	0.254897	-1.26028	0.593635	0.032794	0.246198	-1.50522	0.608715
Other pharmacogenomic interactions	219	AT-7519	CDK1, CDK2, CDK4, CDK6, CDK9	NRAS_mut	BLCA	3	19	0.106207	0.254897	-1.15302	0.593635	0.174125	0.323572	-0.982569	0.490029
Other pharmacogenomic interactions	167	OSU-03012	PDK1 (PDPK1)	TP53_mut	BLCA	15	19	0.0212552	0.255062	-1.39364	0.593354	0.0139697	0.167637	-1.58529	0.775631
Other pharmacogenomic interactions	180	Thapsigargin	SERCA	loss:cnaLUSC51	LUSC	6	14	0.0478501	0.255201	-1.20513	0.593118	0.0370496	0.296397	-1.35128	0.528126
Other pharmacogenomic interactions	180	Thapsigargin	SERCA	gain:cnaLUSC30	LUSC	3	14	0.0412203	0.255201	-1.57642	0.593118	0.115815	0.439309	-0.853046	0.35723
Other pharmacogenomic interactions	180	Thapsigargin	SERCA	gain:cnaLUSC32 (BCL11A,REL,XPO1)	LUSC	3	14	0.0412203	0.255201	-1.57642	0.593118	0.115815	0.439309	-0.853046	0.35723
Other pharmacogenomic interactions	292	Masitinib	KIT, PDGFRA, PDGFRB	gain:cnaLGG16 (EGFR)	LGG	5	17	0.0729398	0.255289	-1.04881	0.592967	0.0413416	0.0964637	-1.20645	1.01564
Other pharmacogenomic interactions	1020	Lenalidomide	CRBN	CTCF_mut	UCEC	3	8	0.11613	0.255487	-1.53684	0.592632	0.597897	0.737355	-1.52835	0.132324
Other pharmacogenomic interactions	254	Quizartinib	FLT3	loss:cnaGBM134	GBM	3	35	0.178152	0.255609	-0.869885	0.592423	0.128062	0.201421	-1.00753	0.695894
Other pharmacogenomic interactions	254	Quizartinib	FLT3	loss:cnaGBM135	GBM	3	35	0.178152	0.255609	-0.869885	0.592423	0.128062	0.201421	-1.00753	0.695894
Other pharmacogenomic interactions	1023	GW441756	NTRK1	NR4A2_mut	COREAD	5	43	0.00320371	0.256297	-1.66717	0.591257	0.00997127	0.398851	-1.63428	0.39919
Other pharmacogenomic interactions	302	PI-103	PI3Kalpha, DAPK3, CLK4, PIM3, HIPK2	loss:cnaLIHC10 (RB1)	LIHC	3	17	0.170901	0.256351	-0.851021	0.591165	0.627577	0.644387	-0.280025	0.190853
Other pharmacogenomic interactions	308	WIKI4	TNKS1, TNKS2	NF1_mut	GBM	8	35	0.163161	0.256395	-0.423515	0.59109	0.114122	0.221532	-0.560285	0.654564
Other pharmacogenomic interactions	308	WIKI4	TNKS1, TNKS2	loss:cnaGBM132	GBM	3	35	0.16174	0.256395	-0.906228	0.59109	0.50572	0.618102	-0.435508	0.20894
Other pharmacogenomic interactions	272	AR-42	HDAC1	TP53_mut	THCA	11	16	0.141842	0.256515	-0.596841	0.590887	0.181402	0.380654	-0.515917	0.41947
Other pharmacogenomic interactions	283	Omipalisib	PI3K (class 1), MTORC1, MTORC2	gain:cnaBRCA26 (CDK12,ERBB2,MED24)	BRCA	14	48	0.0106938	0.256651	-0.829062	0.590657	0.00247028	0.088174	-1.05975	1.05466
Other pharmacogenomic interactions	272	AR-42	HDAC1	loss:cnaKIRC16	KIRC	6	30	0.0946809	0.256991	-0.75466	0.590082	0.0381519	0.144977	-0.920872	0.8387
Other pharmacogenomic interactions	1016	Temsirolimus	MTOR	ASXL1_mut	LAML	5	24	0.128524	0.257049	-0.716691	0.589985	0.114758	0.279231	-0.754999	0.554036
Other pharmacogenomic interactions	277	Linifanib	VEGFR1, VEGFR2, VEGFR3, CSF1R, FLT3, KIT	gain:cnaGBM122	GBM	9	35	0.101316	0.257188	-0.609433	0.58975	0.696917	0.766609	-0.108025	0.115426
Other pharmacogenomic interactions	156	AZD6482	PI3Kbeta	EP300_mut	PAAD	3	29	0.085734	0.257202	-1.39385	0.589725	0.0828668	0.2486	-1.33435	0.604498
Other pharmacogenomic interactions	1143	HG-5-88-01	EGFR, ADCK4	ARID1A_mut	UCEC	3	7	0.0735183	0.257314	-0.778726	0.589537	0.0814503	0.285076	-0.152398	0.545039
Other pharmacogenomic interactions	1143	HG-5-88-01	EGFR, ADCK4	PIK3CA_mut	UCEC	4	7	0.0735183	0.257314	-0.503558	0.589537	0.0814503	0.285076	-0.112479	0.545039
Other pharmacogenomic interactions	1061	SB590885	BRAF	loss:cnaOV21	OV	3	33	0.00781491	0.257892	-1.85071	0.588562	0.114933	0.575921	-1.0274	0.239637
Other pharmacogenomic interactions	1061	SB590885	BRAF	loss:cnaOV22	OV	3	33	0.00781491	0.257892	-1.85071	0.588562	0.114933	0.575921	-1.0274	0.239637
Other pharmacogenomic interactions	1050	ZM447439	AURKA, AURKB	loss:cnaLUSC17 (FAT1,IRF2)	LUSC	5	12	0.0368615	0.258031	-1.48855	0.588329	0.127723	0.846478	-0.99451	0.0723843
Other pharmacogenomic interactions	332	XMD15-27	CAMK2	gain:cnaOV94	OV	7	32	0.0328276	0.258517	-0.880236	0.587511	0.987075	0.987075	0.195264	-0.00564988
Other pharmacogenomic interactions	332	XMD15-27	CAMK2	gain:cnaOV51 (MYC)	OV	8	32	0.0272102	0.258517	-0.882764	0.587511	0.840074	0.882077	0.145617	-0.0544933
Other pharmacogenomic interactions	332	XMD15-27	CAMK2	gain:cnaOV18 (CCNE1)	OV	4	32	0.0210776	0.258517	-1.21687	0.587511	0.431218	0.631474	0.561657	-0.199644
Other pharmacogenomic interactions	292	Masitinib	KIT, PDGFRA, PDGFRB	PTEN_mut	UCEC	6	9	0.055445	0.258743	-1.49414	0.587131	0.0604661	0.282175	-1.6928	0.549481
Other pharmacogenomic interactions	203	BMS-345541	IKK1, IKK2	NRAS_mut	THCA	3	16	0.17275	0.259125	-1.00156	0.586491	0.119941	0.359823	-1.18057	0.443911
Other pharmacogenomic interactions	203	BMS-345541	IKK1, IKK2	BRAF_mut	THCA	7	16	0.113968	0.259125	-1.0753	0.586491	0.479243	0.718864	-0.590102	0.143353
Other pharmacogenomic interactions	328	SNX-2112	HSP90	loss:cnaKIRC19	KIRC	8	30	0.0864339	0.259302	-0.717709	0.586195	0.268475	0.704747	-0.469261	0.151967
Other pharmacogenomic interactions	193	GW-2580	CSF1R	loss:cnaBLCA18 (CHD9,CNOT1,CYLD,MMP2,NUP93)	BLCA	3	19	0.0783145	0.259317	-1.26589	0.586169	0.100351	0.401403	-1.19022	0.39642
Other pharmacogenomic interactions	193	GW-2580	CSF1R	EP300_mut	BLCA	4	19	0.086439	0.259317	-1.06479	0.586169	0.591703	0.792433	-0.337804	0.101038
Other pharmacogenomic interactions	193	GW-2580	CSF1R	NRAS_mut	BLCA	3	19	0.0618251	0.259317	-1.34803	0.586169	0.820333	0.838261	-0.240718	0.0766208
Other pharmacogenomic interactions	1028	VX-702	p38	MKL1_mut	UCEC	3	8	0.047175	0.259463	-2.34354	0.585925	0.87853	0.87853	-0.297672	0.0562435
Other pharmacogenomic interactions	1028	VX-702	p38	PTEN_mut	UCEC	5	8	0.047175	0.259463	-0.177882	0.585925	0.87853	0.87853	-0.797248	0.0562435
Other pharmacogenomic interactions	1529	Pevonedistat	NAE	loss:cnaGBM47	GBM	4	24	0.0865103	0.259531	-0.559681	0.585811	0.141964	0.393594	-0.464312	0.404951
Other pharmacogenomic interactions	1005	Cisplatin	DNA crosslinker	loss:cnaSTAD16	STAD	8	22	0.0123613	0.259588	-1.26706	0.585716	0.00333095	0.06995	-1.33449	1.15521
Other pharmacogenomic interactions	308	WIKI4	TNKS1, TNKS2	BRAF_mut	THCA	7	15	0.129817	0.259635	-1.02918	0.585637	0.147447	0.294895	-1.0209	0.530333
Other pharmacogenomic interactions	1268	XAV939	TNKS1, TNKS2	gain:cnaOV48 (SOX17)	OV	3	32	0.00851352	0.259662	-1.63567	0.585591	0.0153529	0.212154	-1.51792	0.67335
Other pharmacogenomic interactions	1268	XAV939	TNKS1, TNKS2	gain:cnaOV94	OV	7	32	0.00581702	0.259662	-1.38277	0.585591	0.102245	0.261782	-0.80984	0.58206
Other pharmacogenomic interactions	1059	AZD8055	MTORC1, MTORC2	TP53_mut	THCA	9	13	0.0865856	0.259757	-0.475342	0.585433	0.820569	0.820569	0.311251	-0.085885
Other pharmacogenomic interactions	260	NG-25	TAK1, MAP4K2	BRAF_mut	THCA	7	16	0.173279	0.259919	-0.956209	0.585163	0.175716	0.271334	-0.933963	0.566496
Other pharmacogenomic interactions	224	AS605240	PI3Kgamma	loss:cnaLUAD14	LUAD	7	61	0.00620039	0.260416	-0.891541	0.584332	0.00270636	0.113667	-1.08394	0.944364
Other pharmacogenomic interactions	32	Tozasertib	AURKA, AURKB, AURKC, others	loss:cnaCOREAD19	COREAD	4	15	0.0500064	0.260603	-2.55111	0.584021	0.0186463	0.14917	-1.99435	0.826318
Other pharmacogenomic interactions	32	Tozasertib	AURKA, AURKB, AURKC, others	BRAF_mut	COREAD	5	15	0.0543601	0.260603	-1.60921	0.584021	0.0613899	0.36834	-1.70682	0.433752
Other pharmacogenomic interactions	32	Tozasertib	AURKA, AURKB, AURKC, others	AKAP9_mut	COREAD	3	15	0.0368566	0.260603	-0.34579	0.584021	0.143755	0.690022	-0.153633	0.161137
Other pharmacogenomic interactions	32	Tozasertib	AURKA, AURKB, AURKC, others	EP300_mut	COREAD	4	15	0.0651507	0.260603	-2.46365	0.584021	0.310585	0.778604	-1.33898	0.108684
Other pharmacogenomic interactions	229	Enzastaurin	PKCB	loss:cnaSKCM4 (BNC2,CDKN2A,JAK2,PSIP1)	SKCM	36	52	0.0108602	0.260644	-0.829545	0.583953	0.0138484	0.16618	-0.788627	0.77942
Other pharmacogenomic interactions	271	VNLG/124	HDAC,RAR	loss:cnaSKCM28	SKCM	7	52	0.0371644	0.260647	-0.600461	0.583947	0.298801	0.717123	-0.404548	0.144406
Other pharmacogenomic interactions	271	VNLG/124	HDAC,RAR	loss:cnaSKCM27 (CASP1)	SKCM	6	52	0.0434412	0.260647	-0.707802	0.583947	0.531047	0.772786	-0.350087	0.111941
Other pharmacogenomic interactions	279	BIX02189	MEK5, ERK5	gain:cnaGBM25 (CDK4)	GBM	4	35	0.0790543	0.260879	-0.994869	0.583561	0.196552	0.408101	-0.665841	0.389233
Other pharmacogenomic interactions	1018	Veliparib	PARP1, PARP2	loss:cnaSTAD16	STAD	8	22	0.0265767	0.2609	-0.934596	0.583526	0.124882	0.594208	-0.860588	0.226061
Other pharmacogenomic interactions	1018	Veliparib	PARP1, PARP2	loss:cnaSTAD27 (MAP2K4)	STAD	4	22	0.0372715	0.2609	-1.76292	0.583526	0.239789	0.629445	-0.410464	0.201042
Other pharmacogenomic interactions	1018	Veliparib	PARP1, PARP2	loss:cnaSTAD11	STAD	4	22	0.033773	0.2609	-1.5507	0.583526	0.567097	0.861239	0.46029	-0.0648765
Other pharmacogenomic interactions	222	BX-912	PDK1 (PDPK1)	ASXL1_mut	LAML	5	26	0.130499	0.260998	-0.888912	0.583362	0.186005	0.37201	-0.813622	0.429445
Other pharmacogenomic interactions	1009	Tretinoin	Retinoic acid	TP53_mut	LIHC	10	14	0.130503	0.261007	-0.884143	0.583348	0.853891	0.915821	0.083446	-0.0381893
Other pharmacogenomic interactions	37	Crizotinib	MET, ALK, ROS1	loss:cnaSKCM27 (CASP1)	SKCM	3	18	0.0580052	0.261023	-1.11272	0.583321	0.169744	0.647554	0.66128	-0.188724
Other pharmacogenomic interactions	1527	Pictilisib	PI3K (class 1)	gain:cnaLUSC41 (AKAP9)	LUSC	4	15	0.0319346	0.261163	-1.19528	0.583088	0.0509089	0.329428	-1.05155	0.482239
Other pharmacogenomic interactions	1527	Pictilisib	PI3K (class 1)	loss:cnaLUSC4	LUSC	7	15	0.0870544	0.261163	-1.08322	0.583088	0.225624	0.399816	-0.781224	0.39814
Other pharmacogenomic interactions	152	CP466722	ATM	loss:cnaGBM133	GBM	3	35	0.118781	0.261319	-0.446906	0.582829	0.0725285	0.184111	-0.659547	0.734921
Other pharmacogenomic interactions	167	OSU-03012	PDK1 (PDPK1)	loss:cnaLIHC10 (RB1)	LIHC	3	17	0.174374	0.261561	-0.930825	0.582428	0.309292	0.309292	-0.696337	0.509632
Other pharmacogenomic interactions	1091	BMS-536924	IGF1R, IR	loss:cnaCOREAD18	COREAD	10	49	0.00808064	0.261614	-0.88863	0.58234	0.036649	0.321232	-0.739925	0.493182
Other pharmacogenomic interactions	1372	Trametinib	MEK1, MEK2	NF1_mut	GBM	8	34	0.142721	0.261655	-0.825073	0.582272	0.173414	0.313026	-0.754198	0.50442
Other pharmacogenomic interactions	155	Ponatinib	ABL, PDGFRA, VEGFR2, FGFR1, SRC, TIE2, FLT3	loss:cnaLIHC10 (RB1)	LIHC	3	17	0.0872417	0.261725	-1.19393	0.582155	0.0538311	0.161493	-1.37091	0.791845
Other pharmacogenomic interactions	1372	Trametinib	MEK1, MEK2	NRAS_mut	BLCA	3	15	0.0872462	0.261739	-1.23121	0.582132	0.0210241	0.189217	-1.79398	0.723041
Other pharmacogenomic interactions	256	JW-7-24-1	LCK	BRAF_mut	THCA	7	16	0.0872747	0.261824	-1.1049	0.58199	0.061633	0.184899	-1.17309	0.733065
Other pharmacogenomic interactions	175	PAC-1	Procaspase-3, Procaspase-7	gain:cnaBLCA9	BLCA	4	19	0.0218238	0.261886	-1.44145	0.581887	0.182836	0.438807	-0.816863	0.357727
Other pharmacogenomic interactions	341	Selisistat	SIRT1	EP300_mut	BLCA	4	19	0.0849459	0.262425	-0.941243	0.580994	0.0946959	0.280389	-1.01893	0.55224
Other pharmacogenomic interactions	341	Selisistat	SIRT1	MLL2_mut	BLCA	3	19	0.0833333	0.262425	-0.962796	0.580994	0.116829	0.280389	-1.03981	0.55224
Other pharmacogenomic interactions	341	Selisistat	SIRT1	NRAS_mut	BLCA	3	19	0.0874752	0.262425	-0.948104	0.580994	0.677586	0.739185	-0.253443	0.131247
Other pharmacogenomic interactions	300	CX-5461	RNA Polymerase 1	SMARCA4_mut	OV	3	31	0.0043058	0.262654	-1.541	0.580616	0.00852709	0.382799	-1.24964	0.417029
Other pharmacogenomic interactions	333	T0901317	LXR, FXR	NF1_mut	COREAD	7	45	0.00604238	0.262844	-1.3696	0.580303	0.192675	0.989032	-0.686957	0.00478959
[truncated: 98,814 more rows]
