# Supplementary material for: A statistical framework for assessing pharmacological response and biomarkers using uncertainty estimates
Source: bioRxiv preprint, doi:10.1101/2020.05.01.072983, version 3 (2020-06-21)
Supplement: Supplementary Table 2 [file 072983_file04.xlsx]

## Sheet: Supplementary_Table2
Table S2 - Pharmacogenomic associations based on Bayesian testing of GP curve fits.
Biomarker	Drug_Name	GDSC_Drug_ID	Mutant_Cell_Lines	Total_Cell_Lines	Cancer_Name	Bayesian_Effect_Size	Bayesian_Effect_SD	Bayesian_Posterior_Probability
ARID1A	(5Z)-7-Oxozeaenol 1242	1242	5	19	BLCA	-0.0258112	0.12292	0.4425
CDKN1A	(5Z)-7-Oxozeaenol 1242	1242	3	19	BLCA	0.0134868	0.115775	0.46125
EP300	(5Z)-7-Oxozeaenol 1242	1242	4	19	BLCA	-0.0440256	0.151529	0.3975
MLL2	(5Z)-7-Oxozeaenol 1242	1242	3	19	BLCA	-0.057313	0.166777	0.37375
NRAS	(5Z)-7-Oxozeaenol 1242	1242	3	19	BLCA	-0.0850757	0.19528	0.3375
RB1	(5Z)-7-Oxozeaenol 1242	1242	6	19	BLCA	0.0654081	0.152167	0.34
TP53	(5Z)-7-Oxozeaenol 1242	1242	15	19	BLCA	0.0336868	0.127387	0.41375
loss:cnaBLCA5 (FAT1,IRF2)	(5Z)-7-Oxozeaenol 1242	1242	5	19	BLCA	-0.0187416	0.11296	0.45375
gain:cnaBLCA9	(5Z)-7-Oxozeaenol 1242	1242	4	19	BLCA	0.0265034	0.126062	0.43625
gain:cnaBLCA15 (ASXL1)	(5Z)-7-Oxozeaenol 1242	1242	6	19	BLCA	-0.0314907	0.12131	0.43125
loss:cnaBLCA18 (CHD9,CNOT1,CYLD,MMP2,NUP93)	(5Z)-7-Oxozeaenol 1242	1242	3	19	BLCA	0.00977855	0.125842	0.4825
gain:cnaBLCA23 (MYC)	(5Z)-7-Oxozeaenol 1242	1242	4	19	BLCA	-0.0061381	0.115998	0.49625
ARID1A	(5Z)-7-Oxozeaenol 1242	1242	5	46	BRCA	-0.0296748	0.121943	0.43875
ASH1L	(5Z)-7-Oxozeaenol 1242	1242	3	46	BRCA	-0.0741308	0.1748	0.33
BRCA1	(5Z)-7-Oxozeaenol 1242	1242	4	46	BRCA	0.0204809	0.123438	0.44875
BRCA2	(5Z)-7-Oxozeaenol 1242	1242	5	46	BRCA	-0.0161671	0.107361	0.45625
CDH1	(5Z)-7-Oxozeaenol 1242	1242	5	46	BRCA	0.0179022	0.105451	0.44125
MACF1	(5Z)-7-Oxozeaenol 1242	1242	3	46	BRCA	0.0033395	0.110634	0.4975
MLL3	(5Z)-7-Oxozeaenol 1242	1242	3	46	BRCA	0.021783	0.131157	0.45875
NF1	(5Z)-7-Oxozeaenol 1242	1242	5	46	BRCA	0.0130957	0.101218	0.47125
PIK3CA	(5Z)-7-Oxozeaenol 1242	1242	16	46	BRCA	0.0125921	0.0963925	0.465
POLR2B	(5Z)-7-Oxozeaenol 1242	1242	3	46	BRCA	-0.00751634	0.119451	0.4775
PTEN	(5Z)-7-Oxozeaenol 1242	1242	8	46	BRCA	-0.0287738	0.1023	0.4025
TP53	(5Z)-7-Oxozeaenol 1242	1242	36	46	BRCA	0.0402707	0.118829	0.4025
gain:cnaBRCA5 (GATA3,KLF6,LARP4B,VIM)	(5Z)-7-Oxozeaenol 1242	1242	6	46	BRCA	0.00155751	0.105946	0.4925
loss:cnaBRCA7 (FAS,PTEN)	(5Z)-7-Oxozeaenol 1242	1242	4	46	BRCA	0.033243	0.12765	0.4
gain:cnaBRCA8 (CHD4,WNK1)	(5Z)-7-Oxozeaenol 1242	1242	3	46	BRCA	0.0208371	0.130206	0.4375
gain:cnaBRCA9 (KRAS)	(5Z)-7-Oxozeaenol 1242	1242	4	46	BRCA	0.00752439	0.117689	0.48125
gain:cnaBRCA10 (MDM2,NUP107)	(5Z)-7-Oxozeaenol 1242	1242	3	46	BRCA	-0.00344632	0.109866	0.49
gain:cnaBRCA12 (TERT)	(5Z)-7-Oxozeaenol 1242	1242	10	46	BRCA	-0.0112235	0.0983946	0.44625
gain:cnaBRCA13 (FGFR1,WHSC1L1)	(5Z)-7-Oxozeaenol 1242	1242	9	46	BRCA	-0.00229472	0.101643	0.5
gain:cnaBRCA14 (RAD21)	(5Z)-7-Oxozeaenol 1242	1242	20	46	BRCA	0.0471582	0.113584	0.3675
gain:cnaBRCA15	(5Z)-7-Oxozeaenol 1242	1242	21	46	BRCA	0.0326041	0.101122	0.38625
gain:cnaBRCA16	(5Z)-7-Oxozeaenol 1242	1242	16	46	BRCA	0.0639163	0.130503	0.32125
loss:cnaBRCA17	(5Z)-7-Oxozeaenol 1242	1242	9	46	BRCA	0.0572707	0.140959	0.37
loss:cnaBRCA18	(5Z)-7-Oxozeaenol 1242	1242	15	46	BRCA	0.0708858	0.135992	0.30875
gain:cnaBRCA19	(5Z)-7-Oxozeaenol 1242	1242	4	46	BRCA	0.0179231	0.113073	0.45125
loss:cnaBRCA20	(5Z)-7-Oxozeaenol 1242	1242	3	46	BRCA	0.0205084	0.123682	0.45875
loss:cnaBRCA22 (SYNCRIP,ZNF292)	(5Z)-7-Oxozeaenol 1242	1242	18	46	BRCA	0.0555533	0.123233	0.3425
loss:cnaBRCA23	(5Z)-7-Oxozeaenol 1242	1242	3	46	BRCA	0.0488425	0.145712	0.3975
loss:cnaBRCA24	(5Z)-7-Oxozeaenol 1242	1242	3	46	BRCA	0.0532994	0.171046	0.3975
loss:cnaBRCA25 (ARID1B,MAP3K4,MLLT4)	(5Z)-7-Oxozeaenol 1242	1242	6	46	BRCA	0.0330629	0.120978	0.415
gain:cnaBRCA26 (CDK12,ERBB2,MED24)	(5Z)-7-Oxozeaenol 1242	1242	14	46	BRCA	0.113978	0.170954	0.25125
gain:cnaBRCA27 (CLTC,PPM1D)	(5Z)-7-Oxozeaenol 1242	1242	10	46	BRCA	0.0814228	0.151594	0.2925
loss:cnaBRCA28 (GPS2)	(5Z)-7-Oxozeaenol 1242	1242	4	46	BRCA	0.0191611	0.115429	0.465
loss:cnaBRCA29 (MAP2K4)	(5Z)-7-Oxozeaenol 1242	1242	7	46	BRCA	-0.0105685	0.110544	0.47125
gain:cnaBRCA30 (CRNKL1,FOXA2)	(5Z)-7-Oxozeaenol 1242	1242	5	46	BRCA	0.0505408	0.13855	0.37125
gain:cnaBRCA31	(5Z)-7-Oxozeaenol 1242	1242	14	46	BRCA	0.0661746	0.127844	0.30875
loss:cnaBRCA32 (PABPC3,SACS,ZMYM2)	(5Z)-7-Oxozeaenol 1242	1242	8	46	BRCA	0.00828721	0.108761	0.4875
loss:cnaBRCA33	(5Z)-7-Oxozeaenol 1242	1242	5	46	BRCA	-0.0545519	0.153933	0.37375
loss:cnaBRCA34	(5Z)-7-Oxozeaenol 1242	1242	5	46	BRCA	0.0187789	0.119983	0.46375
loss:cnaBRCA36 (FAT1,IRF2)	(5Z)-7-Oxozeaenol 1242	1242	9	46	BRCA	-0.0250405	0.103673	0.4075
loss:cnaBRCA38	(5Z)-7-Oxozeaenol 1242	1242	3	46	BRCA	0.0231815	0.134126	0.45625
gain:cnaBRCA39 (FOXA1,NKX2-1,PSMA6)	(5Z)-7-Oxozeaenol 1242	1242	6	46	BRCA	0.0186933	0.118833	0.46625
gain:cnaBRCA47 (EGFR)	(5Z)-7-Oxozeaenol 1242	1242	6	46	BRCA	-0.028798	0.107128	0.43625
gain:cnaBRCA48	(5Z)-7-Oxozeaenol 1242	1242	5	46	BRCA	-0.018154	0.110311	0.46375
loss:cnaBRCA57	(5Z)-7-Oxozeaenol 1242	1242	5	46	BRCA	0.0507023	0.146066	0.40125
gain:cnaBRCA58 (CCND1)	(5Z)-7-Oxozeaenol 1242	1242	9	46	BRCA	0.0032477	0.0926723	0.4925
loss:cnaBRCA60	(5Z)-7-Oxozeaenol 1242	1242	3	46	BRCA	0.0258933	0.131125	0.43
gain:cnaBRCA62	(5Z)-7-Oxozeaenol 1242	1242	8	46	BRCA	0.00803618	0.0984451	0.46125
gain:cnaBRCA63	(5Z)-7-Oxozeaenol 1242	1242	6	46	BRCA	-0.0012704	0.108407	0.495
gain:cnaBRCA64 (SDHC)	(5Z)-7-Oxozeaenol 1242	1242	9	46	BRCA	-0.0104627	0.115146	0.48875
AKAP9	(5Z)-7-Oxozeaenol 1242	1242	8	49	COREAD	-0.00836338	0.0958324	0.4625
APC	(5Z)-7-Oxozeaenol 1242	1242	36	49	COREAD	0.012998	0.0910594	0.4625
ARID1A	(5Z)-7-Oxozeaenol 1242	1242	11	49	COREAD	-0.0389459	0.104284	0.38625
ARID1B	(5Z)-7-Oxozeaenol 1242	1242	3	49	COREAD	0.0710963	0.176894	0.39125
ARID2	(5Z)-7-Oxozeaenol 1242	1242	7	49	COREAD	0.0197699	0.1047	0.45625
ASPM	(5Z)-7-Oxozeaenol 1242	1242	7	49	COREAD	-0.026118	0.108791	0.44375
ASXL2	(5Z)-7-Oxozeaenol 1242	1242	4	49	COREAD	0.0191914	0.11106	0.44625
ATM	(5Z)-7-Oxozeaenol 1242	1242	4	49	COREAD	0.0183353	0.114826	0.40125
ATRX	(5Z)-7-Oxozeaenol 1242	1242	4	49	COREAD	-0.000883351	0.116644	0.475
B2M	(5Z)-7-Oxozeaenol 1242	1242	9	49	COREAD	0.00219277	0.0935991	0.46125
BCOR	(5Z)-7-Oxozeaenol 1242	1242	5	49	COREAD	-0.0222299	0.109244	0.41125
BMPR2	(5Z)-7-Oxozeaenol 1242	1242	14	49	COREAD	-0.0101166	0.0958653	0.49
BPTF	(5Z)-7-Oxozeaenol 1242	1242	5	49	COREAD	0.0194828	0.116528	0.46375
BRAF	(5Z)-7-Oxozeaenol 1242	1242	11	49	COREAD	-0.0681053	0.132255	0.31375
BRWD1	(5Z)-7-Oxozeaenol 1242	1242	3	49	COREAD	-0.0487521	0.137953	0.37375
CDH1	(5Z)-7-Oxozeaenol 1242	1242	3	49	COREAD	-0.032821	0.125233	0.39
CDK12	(5Z)-7-Oxozeaenol 1242	1242	3	49	COREAD	0.0254311	0.124749	0.42375
CEP290	(5Z)-7-Oxozeaenol 1242	1242	6	49	COREAD	0.0734427	0.163769	0.33875
CHD4	(5Z)-7-Oxozeaenol 1242	1242	3	49	COREAD	-0.0103296	0.120409	0.46875
CHD9	(5Z)-7-Oxozeaenol 1242	1242	10	49	COREAD	0.0179102	0.101318	0.4475
CLSPN	(5Z)-7-Oxozeaenol 1242	1242	3	49	COREAD	0.0154982	0.126456	0.46625
CNOT1	(5Z)-7-Oxozeaenol 1242	1242	3	49	COREAD	0.05433	0.150702	0.3675
CREBBP	(5Z)-7-Oxozeaenol 1242	1242	7	49	COREAD	0.0608965	0.136281	0.36125
CTCF	(5Z)-7-Oxozeaenol 1242	1242	8	49	COREAD	0.0180634	0.108346	0.45
CTNNB1	(5Z)-7-Oxozeaenol 1242	1242	6	49	COREAD	-0.0119985	0.0982049	0.4425
DNMT3A	(5Z)-7-Oxozeaenol 1242	1242	3	49	COREAD	0.0160351	0.113963	0.435
EGFR	(5Z)-7-Oxozeaenol 1242	1242	4	49	COREAD	0.0109674	0.100197	0.46875
ELF3	(5Z)-7-Oxozeaenol 1242	1242	4	49	COREAD	0.0358964	0.138175	0.4325
EP300	(5Z)-7-Oxozeaenol 1242	1242	15	49	COREAD	0.0340839	0.103191	0.395
FAM123B	(5Z)-7-Oxozeaenol 1242	1242	5	49	COREAD	-0.00457312	0.108747	0.4875
FBXW7	(5Z)-7-Oxozeaenol 1242	1242	14	49	COREAD	-0.0176889	0.0901796	0.43375
ITSN1	(5Z)-7-Oxozeaenol 1242	1242	3	49	COREAD	-0.0299766	0.12976	0.4275
KDM6A	(5Z)-7-Oxozeaenol 1242	1242	3	49	COREAD	-0.0179414	0.118493	0.45875
KRAS	(5Z)-7-Oxozeaenol 1242	1242	26	49	COREAD	-0.0211704	0.0871954	0.4275
LARP4B	(5Z)-7-Oxozeaenol 1242	1242	5	49	COREAD	-0.00943218	0.104592	0.45875
LPHN2	(5Z)-7-Oxozeaenol 1242	1242	4	49	COREAD	0.01135	0.10051	0.44
MAP2K4	(5Z)-7-Oxozeaenol 1242	1242	5	49	COREAD	0.0346058	0.125672	0.405
MAP3K4	(5Z)-7-Oxozeaenol 1242	1242	3	49	COREAD	-0.0257739	0.116882	0.41125
MECOM	(5Z)-7-Oxozeaenol 1242	1242	5	49	COREAD	0.0222098	0.108724	0.40875
MGA	(5Z)-7-Oxozeaenol 1242	1242	6	49	COREAD	-0.00217153	0.0961402	0.495
MLL2	(5Z)-7-Oxozeaenol 1242	1242	14	49	COREAD	6.10353e-05	0.0979679	0.4725
NCOR1	(5Z)-7-Oxozeaenol 1242	1242	7	49	COREAD	-0.0325348	0.112394	0.3975
NF1	(5Z)-7-Oxozeaenol 1242	1242	7	49	COREAD	-0.00218656	0.0940725	0.4975
NR4A2	(5Z)-7-Oxozeaenol 1242	1242	5	49	COREAD	-0.0103806	0.10475	0.48125
NUP98	(5Z)-7-Oxozeaenol 1242	1242	5	49	COREAD	-0.0622804	0.149026	0.35875
PBRM1	(5Z)-7-Oxozeaenol 1242	1242	4	49	COREAD	-0.0217659	0.116923	0.44125
PIK3CA	(5Z)-7-Oxozeaenol 1242	1242	14	49	COREAD	0.0365747	0.11482	0.4025
PIK3R1	(5Z)-7-Oxozeaenol 1242	1242	5	49	COREAD	0.0992733	0.187737	0.3075
POLR2B	(5Z)-7-Oxozeaenol 1242	1242	3	49	COREAD	-0.00479243	0.114951	0.485
PTEN	(5Z)-7-Oxozeaenol 1242	1242	6	49	COREAD	0.053506	0.136668	0.345
RNF43	(5Z)-7-Oxozeaenol 1242	1242	10	49	COREAD	-0.000643721	0.0903541	0.48375
SACS	(5Z)-7-Oxozeaenol 1242	1242	9	49	COREAD	0.0169538	0.0982784	0.4525
SMAD4	(5Z)-7-Oxozeaenol 1242	1242	8	49	COREAD	0.0197164	0.104287	0.4475
SMARCA4	(5Z)-7-Oxozeaenol 1242	1242	4	49	COREAD	-0.0225195	0.128901	0.46
SOS2	(5Z)-7-Oxozeaenol 1242	1242	5	49	COREAD	0.0111097	0.110201	0.4725
SOX9	(5Z)-7-Oxozeaenol 1242	1242	6	49	COREAD	0.0137717	0.116803	0.45875
SRGAP3	(5Z)-7-Oxozeaenol 1242	1242	3	49	COREAD	-0.0169166	0.120802	0.45875
TCF7L2	(5Z)-7-Oxozeaenol 1242	1242	3	49	COREAD	0.015771	0.114796	0.4575
TP53	(5Z)-7-Oxozeaenol 1242	1242	37	49	COREAD	0.124415	0.165965	0.22
TP53BP1	(5Z)-7-Oxozeaenol 1242	1242	3	49	COREAD	-0.0430318	0.131916	0.36375
TRIO	(5Z)-7-Oxozeaenol 1242	1242	7	49	COREAD	0.0456172	0.124936	0.37125
ZC3H11A	(5Z)-7-Oxozeaenol 1242	1242	3	49	COREAD	0.0201157	0.130528	0.45
loss:cnaCOREAD11	(5Z)-7-Oxozeaenol 1242	1242	20	49	COREAD	-0.0085246	0.0890768	0.4675
loss:cnaCOREAD12 (PCDH18)	(5Z)-7-Oxozeaenol 1242	1242	3	49	COREAD	-0.000959474	0.110602	0.49375
loss:cnaCOREAD14	(5Z)-7-Oxozeaenol 1242	1242	3	49	COREAD	0.00348498	0.118766	0.49375
loss:cnaCOREAD18	(5Z)-7-Oxozeaenol 1242	1242	10	49	COREAD	-0.00595006	0.0939316	0.4675
loss:cnaCOREAD19	(5Z)-7-Oxozeaenol 1242	1242	19	49	COREAD	-0.0369109	0.0978068	0.37
loss:cnaCOREAD21	(5Z)-7-Oxozeaenol 1242	1242	3	49	COREAD	-0.0476163	0.139359	0.37875
loss:cnaCOREAD23	(5Z)-7-Oxozeaenol 1242	1242	3	49	COREAD	-0.0287313	0.126234	0.41875
loss:cnaCOREAD24	(5Z)-7-Oxozeaenol 1242	1242	11	49	COREAD	-0.0206799	0.102544	0.435
loss:cnaCOREAD27 (MAP2K4)	(5Z)-7-Oxozeaenol 1242	1242	4	49	COREAD	-0.0336945	0.117189	0.41
loss:cnaCOREAD28 (SOX9)	(5Z)-7-Oxozeaenol 1242	1242	3	49	COREAD	-0.0293248	0.123419	0.42
gain:cnaCOREAD31	(5Z)-7-Oxozeaenol 1242	1242	6	49	COREAD	-0.00270317	0.108368	0.4925
gain:cnaCOREAD32 (STK4)	(5Z)-7-Oxozeaenol 1242	1242	7	49	COREAD	-0.0108213	0.105141	0.45875
loss:cnaCOREAD33	(5Z)-7-Oxozeaenol 1242	1242	23	49	COREAD	-0.000960067	0.0874668	0.5
gain:cnaCOREAD35 (FLT3,WASF3)	(5Z)-7-Oxozeaenol 1242	1242	8	49	COREAD	0.0568798	0.135099	0.36
gain:cnaCOREAD36	(5Z)-7-Oxozeaenol 1242	1242	4	49	COREAD	0.106814	0.232027	0.305
gain:cnaCOREAD37 (ING1,IRS2,TFDP1)	(5Z)-7-Oxozeaenol 1242	1242	6	49	COREAD	0.0404722	0.133007	0.39625
loss:cnaCOREAD38 (CDKN2A)	(5Z)-7-Oxozeaenol 1242	1242	7	49	COREAD	0.0378538	0.113419	0.3925
loss:cnaCOREAD42 (B2M,BUB1B,MGA,TP53BP1)	(5Z)-7-Oxozeaenol 1242	1242	3	49	COREAD	0.00913019	0.130052	0.47375
gain:cnaCOREAD47 (MYC)	(5Z)-7-Oxozeaenol 1242	1242	6	49	COREAD	0.0106597	0.107798	0.4775
loss:cnaCOREAD48	(5Z)-7-Oxozeaenol 1242	1242	6	49	COREAD	0.0718963	0.159549	0.325
loss:cnaCOREAD49	(5Z)-7-Oxozeaenol 1242	1242	15	49	COREAD	-0.056934	0.116371	0.34625
gain:cnaCOREAD51 (MET)	(5Z)-7-Oxozeaenol 1242	1242	3	49	COREAD	-0.0995418	0.194383	0.3025
loss:cnaCOREAD53 (ARFGAP3)	(5Z)-7-Oxozeaenol 1242	1242	3	49	COREAD	-0.0275199	0.124679	0.41625
loss:cnaCOREAD54 (SMAD4)	(5Z)-7-Oxozeaenol 1242	1242	13	49	COREAD	-0.0154768	0.0955872	0.4475
loss:cnaCOREAD55	(5Z)-7-Oxozeaenol 1242	1242	13	49	COREAD	-0.0449323	0.125921	0.38625
loss:cnaCOREAD56	(5Z)-7-Oxozeaenol 1242	1242	13	49	COREAD	-0.0435473	0.11059	0.3625
loss:cnaCOREAD63 (APC)	(5Z)-7-Oxozeaenol 1242	1242	7	49	COREAD	0.0926098	0.165451	0.31375
loss:cnaCOREAD65	(5Z)-7-Oxozeaenol 1242	1242	31	49	COREAD	0.0417453	0.104744	0.3475
CREBBP	(5Z)-7-Oxozeaenol 1242	1242	6	29	DLBC	0.0390572	0.114936	0.365
EP300	(5Z)-7-Oxozeaenol 1242	1242	6	29	DLBC	0.0466432	0.123578	0.3775
MLL2	(5Z)-7-Oxozeaenol 1242	1242	9	29	DLBC	0.0179033	0.0946025	0.43375
PTEN	(5Z)-7-Oxozeaenol 1242	1242	5	29	DLBC	-0.0168583	0.101149	0.4425
TP53	(5Z)-7-Oxozeaenol 1242	1242	18	29	DLBC	0.0541456	0.127549	0.36
loss:cnaDLBC4 (CDKN2A)	(5Z)-7-Oxozeaenol 1242	1242	7	29	DLBC	-0.00159316	0.0967864	0.4925
EGFR	(5Z)-7-Oxozeaenol 1242	1242	3	33	ESCA	-0.0199157	0.12017	0.47125
EP300	(5Z)-7-Oxozeaenol 1242	1242	3	33	ESCA	0.0112885	0.108076	0.48625
MLL2	(5Z)-7-Oxozeaenol 1242	1242	3	33	ESCA	-0.03104	0.116993	0.40375
NFE2L2	(5Z)-7-Oxozeaenol 1242	1242	3	33	ESCA	0.012238	0.112029	0.47875
NOTCH1	(5Z)-7-Oxozeaenol 1242	1242	4	33	ESCA	-0.0309284	0.114375	0.415
PIK3CA	(5Z)-7-Oxozeaenol 1242	1242	5	33	ESCA	-0.00422264	0.103899	0.495
SMAD4	(5Z)-7-Oxozeaenol 1242	1242	4	33	ESCA	-0.0129335	0.0990813	0.46125
loss:cnaESCA1	(5Z)-7-Oxozeaenol 1242	1242	6	33	ESCA	0.0161727	0.102581	0.455
gain:cnaESCA2 (KRAS)	(5Z)-7-Oxozeaenol 1242	1242	3	33	ESCA	0.0234472	0.11666	0.445
gain:cnaESCA3 (KRAS)	(5Z)-7-Oxozeaenol 1242	1242	3	33	ESCA	0.0202023	0.106891	0.43625
loss:cnaESCA5 (PAX5)	(5Z)-7-Oxozeaenol 1242	1242	3	33	ESCA	0.0238073	0.122581	0.4375
gain:cnaESCA7 (ERBB2)	(5Z)-7-Oxozeaenol 1242	1242	9	33	ESCA	0.0569213	0.129864	0.34375
gain:cnaESCA9 (EGFR)	(5Z)-7-Oxozeaenol 1242	1242	8	33	ESCA	-0.006419	0.102977	0.49125
gain:cnaESCA11 (CCND1,CTTN)	(5Z)-7-Oxozeaenol 1242	1242	14	33	ESCA	-0.0192885	0.0891173	0.42375
loss:cnaESCA12	(5Z)-7-Oxozeaenol 1242	1242	8	33	ESCA	0.0110431	0.0965441	0.44
loss:cnaESCA14	(5Z)-7-Oxozeaenol 1242	1242	10	33	ESCA	0.0146857	0.0990493	0.4625
NF1	(5Z)-7-Oxozeaenol 1242	1242	8	35	GBM	0.00587387	0.100533	0.495
PTEN	(5Z)-7-Oxozeaenol 1242	1242	18	35	GBM	0.0339137	0.107625	0.37625
RB1	(5Z)-7-Oxozeaenol 1242	1242	5	35	GBM	0.0387301	0.131288	0.43
TP53	(5Z)-7-Oxozeaenol 1242	1242	21	35	GBM	0.11236	0.17346	0.26125
loss:cnaGBM1	(5Z)-7-Oxozeaenol 1242	1242	3	35	GBM	-0.0297886	0.123823	0.42125
loss:cnaGBM2 (CDKN2A)	(5Z)-7-Oxozeaenol 1242	1242	26	35	GBM	-0.015326	0.112598	0.44875
loss:cnaGBM19 (FAT1,IRF2)	(5Z)-7-Oxozeaenol 1242	1242	6	35	GBM	-0.00368519	0.101776	0.4925
gain:cnaGBM25 (CDK4)	(5Z)-7-Oxozeaenol 1242	1242	4	35	GBM	-0.0810676	0.178349	0.34375
loss:cnaGBM45	(5Z)-7-Oxozeaenol 1242	1242	3	35	GBM	-0.036456	0.130767	0.42625
loss:cnaGBM47	(5Z)-7-Oxozeaenol 1242	1242	6	35	GBM	-0.202543	0.287244	0.21125
loss:cnaGBM68 (CDKN2C,FAF1)	(5Z)-7-Oxozeaenol 1242	1242	6	35	GBM	-0.00180929	0.103567	0.48375
gain:cnaGBM71 (SOX2)	(5Z)-7-Oxozeaenol 1242	1242	3	35	GBM	-0.00467661	0.123267	0.47625
loss:cnaGBM93	(5Z)-7-Oxozeaenol 1242	1242	6	35	GBM	-0.0242265	0.11205	0.44625
loss:cnaGBM94	(5Z)-7-Oxozeaenol 1242	1242	6	35	GBM	-0.0256575	0.118605	0.43875
loss:cnaGBM95	(5Z)-7-Oxozeaenol 1242	1242	6	35	GBM	-0.0258012	0.112275	0.39875
loss:cnaGBM97	(5Z)-7-Oxozeaenol 1242	1242	3	35	GBM	-0.121741	0.247971	0.30125
loss:cnaGBM98	(5Z)-7-Oxozeaenol 1242	1242	3	35	GBM	-0.11994	0.254415	0.30625
loss:cnaGBM99 (ANK3)	(5Z)-7-Oxozeaenol 1242	1242	3	35	GBM	-0.112256	0.214332	0.29125
loss:cnaGBM100	(5Z)-7-Oxozeaenol 1242	1242	3	35	GBM	-0.123612	0.237527	0.3075
loss:cnaGBM101	(5Z)-7-Oxozeaenol 1242	1242	5	35	GBM	-0.0507804	0.137373	0.37875
loss:cnaGBM102	(5Z)-7-Oxozeaenol 1242	1242	3	35	GBM	-0.129766	0.260109	0.31375
loss:cnaGBM103	(5Z)-7-Oxozeaenol 1242	1242	3	35	GBM	-0.134062	0.227678	0.25125
loss:cnaGBM104	(5Z)-7-Oxozeaenol 1242	1242	3	35	GBM	-0.124032	0.24774	0.2875
loss:cnaGBM105	(5Z)-7-Oxozeaenol 1242	1242	3	35	GBM	-0.120002	0.2525	0.32875
loss:cnaGBM106	(5Z)-7-Oxozeaenol 1242	1242	3	35	GBM	-0.132585	0.247453	0.30125
gain:cnaGBM122	(5Z)-7-Oxozeaenol 1242	1242	9	35	GBM	0.0996105	0.178413	0.28625
gain:cnaGBM123 (EGFR)	(5Z)-7-Oxozeaenol 1242	1242	10	35	GBM	0.0169803	0.112458	0.445
gain:cnaGBM124	(5Z)-7-Oxozeaenol 1242	1242	4	35	GBM	0.0905447	0.186049	0.2975
gain:cnaGBM125 (AKAP9)	(5Z)-7-Oxozeaenol 1242	1242	9	35	GBM	0.0991793	0.177175	0.29
loss:cnaGBM132	(5Z)-7-Oxozeaenol 1242	1242	3	35	GBM	-0.0318256	0.133326	0.42875
loss:cnaGBM133	(5Z)-7-Oxozeaenol 1242	1242	3	35	GBM	-0.0287781	0.136875	0.4375
loss:cnaGBM134	(5Z)-7-Oxozeaenol 1242	1242	3	35	GBM	-0.0139307	0.110715	0.4575
loss:cnaGBM135	(5Z)-7-Oxozeaenol 1242	1242	3	35	GBM	-0.0165983	0.113366	0.4625
CASP8	(5Z)-7-Oxozeaenol 1242	1242	6	37	HNSC	-0.0168912	0.0981861	0.445
CDKN2A	(5Z)-7-Oxozeaenol 1242	1242	8	37	HNSC	0.0235741	0.095828	0.39625
FAT1	(5Z)-7-Oxozeaenol 1242	1242	6	37	HNSC	-0.00968615	0.0954837	0.47625
HLA-A	(5Z)-7-Oxozeaenol 1242	1242	3	37	HNSC	-0.0116572	0.121631	0.4625
NFE2L2	(5Z)-7-Oxozeaenol 1242	1242	3	37	HNSC	0.0102871	0.106685	0.4925
NOTCH1	(5Z)-7-Oxozeaenol 1242	1242	3	37	HNSC	-0.0218648	0.124888	0.44125
NSD1	(5Z)-7-Oxozeaenol 1242	1242	4	37	HNSC	-0.0241886	0.12851	0.455
PIK3CA	(5Z)-7-Oxozeaenol 1242	1242	8	37	HNSC	0.00706305	0.101998	0.47875
SMAD4	(5Z)-7-Oxozeaenol 1242	1242	4	37	HNSC	-0.029764	0.116614	0.4175
TP53	(5Z)-7-Oxozeaenol 1242	1242	33	37	HNSC	0.00637565	0.121489	0.48
gain:cnaHNSC1 (ACTB,CARD11,PMS2,RAC1)	(5Z)-7-Oxozeaenol 1242	1242	7	37	HNSC	0.00787752	0.0932224	0.49125
gain:cnaHNSC2 (EGFR)	(5Z)-7-Oxozeaenol 1242	1242	10	37	HNSC	-0.0164456	0.100295	0.43625
loss:cnaHNSC6	(5Z)-7-Oxozeaenol 1242	1242	15	37	HNSC	0.0467845	0.107153	0.345
gain:cnaHNSC8	(5Z)-7-Oxozeaenol 1242	1242	4	37	HNSC	0.00908932	0.0994379	0.46
loss:cnaHNSC11 (CDKN2A)	(5Z)-7-Oxozeaenol 1242	1242	13	37	HNSC	-0.0418492	0.105255	0.375
gain:cnaHNSC14 (ASXL1)	(5Z)-7-Oxozeaenol 1242	1242	6	37	HNSC	0.0160046	0.0962551	0.445
gain:cnaHNSC17 (CCND1,CTTN)	(5Z)-7-Oxozeaenol 1242	1242	14	37	HNSC	0.0541963	0.111999	0.33625
loss:cnaHNSC19 (MED17)	(5Z)-7-Oxozeaenol 1242	1242	4	37	HNSC	0.0213176	0.109339	0.44
loss:cnaHNSC20	(5Z)-7-Oxozeaenol 1242	1242	14	37	HNSC	-0.0136095	0.08536	0.44
gain:cnaHNSC21 (MCM3)	(5Z)-7-Oxozeaenol 1242	1242	3	37	HNSC	-0.0182504	0.111123	0.47125
loss:cnaHNSC26	(5Z)-7-Oxozeaenol 1242	1242	13	37	HNSC	0.0440029	0.105537	0.33125
loss:cnaHNSC28 (ATP1A1,CSDE1,NRAS)	(5Z)-7-Oxozeaenol 1242	1242	3	37	HNSC	0.0502907	0.152435	0.38375
loss:cnaHNSC29	(5Z)-7-Oxozeaenol 1242	1242	5	37	HNSC	0.0296946	0.110714	0.42
loss:cnaHNSC32 (FAT1)	(5Z)-7-Oxozeaenol 1242	1242	12	37	HNSC	-0.079272	0.13109	0.27625
gain:cnaHNSC33	(5Z)-7-Oxozeaenol 1242	1242	2	37	HNSC	0.021095	0.131207	0.48625
NF2	(5Z)-7-Oxozeaenol 1242	1242	6	30	KIRC	-0.0250908	0.115819	0.41375
PBRM1	(5Z)-7-Oxozeaenol 1242	1242	7	30	KIRC	0.0617959	0.143977	0.35625
PTEN	(5Z)-7-Oxozeaenol 1242	1242	3	30	KIRC	0.0554165	0.156614	0.385
SETD2	(5Z)-7-Oxozeaenol 1242	1242	5	30	KIRC	0.00625564	0.119559	0.4775
TP53	(5Z)-7-Oxozeaenol 1242	1242	11	30	KIRC	0.0738322	0.151758	0.31375
VHL	(5Z)-7-Oxozeaenol 1242	1242	11	30	KIRC	0.0902483	0.161367	0.31375
loss:cnaKIRC3	(5Z)-7-Oxozeaenol 1242	1242	3	30	KIRC	0.0264108	0.140327	0.4325
loss:cnaKIRC4	(5Z)-7-Oxozeaenol 1242	1242	3	30	KIRC	0.0282561	0.119571	0.40125
loss:cnaKIRC5	(5Z)-7-Oxozeaenol 1242	1242	3	30	KIRC	0.0296536	0.126562	0.4425
loss:cnaKIRC7 (CDKN2A)	(5Z)-7-Oxozeaenol 1242	1242	26	30	KIRC	-0.033058	0.125893	0.42125
loss:cnaKIRC12	(5Z)-7-Oxozeaenol 1242	1242	12	30	KIRC	0.09216	0.16074	0.28375
loss:cnaKIRC13	(5Z)-7-Oxozeaenol 1242	1242	12	30	KIRC	0.100995	0.170502	0.29375
loss:cnaKIRC14	(5Z)-7-Oxozeaenol 1242	1242	12	30	KIRC	0.0784827	0.156982	0.2925
loss:cnaKIRC15	(5Z)-7-Oxozeaenol 1242	1242	12	30	KIRC	0.0852926	0.168162	0.335
loss:cnaKIRC16	(5Z)-7-Oxozeaenol 1242	1242	7	30	KIRC	0.0716195	0.158027	0.3475
loss:cnaKIRC19	(5Z)-7-Oxozeaenol 1242	1242	8	30	KIRC	0.0144001	0.108132	0.46875
loss:cnaKIRC22	(5Z)-7-Oxozeaenol 1242	1242	9	30	KIRC	0.101118	0.187798	0.2975
loss:cnaKIRC23	(5Z)-7-Oxozeaenol 1242	1242	3	30	KIRC	0.0163199	0.119172	0.48125
loss:cnaKIRC24 (FAT1,IRF2)	(5Z)-7-Oxozeaenol 1242	1242	7	30	KIRC	0.0611084	0.144062	0.3325
loss:cnaKIRC27	(5Z)-7-Oxozeaenol 1242	1242	3	30	KIRC	0.0312593	0.127196	0.42125
ASXL1	(5Z)-7-Oxozeaenol 1242	1242	5	26	LAML	-0.0295272	0.129253	0.41125
CREBBP	(5Z)-7-Oxozeaenol 1242	1242	3	26	LAML	0.0199918	0.124641	0.42875
KRAS	(5Z)-7-Oxozeaenol 1242	1242	3	26	LAML	0.00521526	0.12759	0.46625
NRAS	(5Z)-7-Oxozeaenol 1242	1242	7	26	LAML	0.0396962	0.131494	0.39
SACS	(5Z)-7-Oxozeaenol 1242	1242	3	26	LAML	0.0469961	0.153979	0.40125
TP53	(5Z)-7-Oxozeaenol 1242	1242	14	26	LAML	0.0234224	0.116297	0.42375
NF1	(5Z)-7-Oxozeaenol 1242	1242	3	17	LGG	-0.000588838	0.121763	0.49125
RB1	(5Z)-7-Oxozeaenol 1242	1242	7	17	LGG	0.023052	0.127159	0.42
TP53	(5Z)-7-Oxozeaenol 1242	1242	12	17	LGG	0.113737	0.218656	0.2975
loss:cnaLGG1 (BNC2,CDKN2A,JAK2,PSIP1)	(5Z)-7-Oxozeaenol 1242	1242	9	17	LGG	-0.0102206	0.111212	0.48
loss:cnaLGG7 (RPL22)	(5Z)-7-Oxozeaenol 1242	1242	3	17	LGG	-0.0223967	0.140935	0.44125
loss:cnaLGG14 (CUL2)	(5Z)-7-Oxozeaenol 1242	1242	4	17	LGG	0.0143186	0.129904	0.45875
gain:cnaLGG16 (EGFR)	(5Z)-7-Oxozeaenol 1242	1242	5	17	LGG	-0.0402886	0.131145	0.3925
TP53	(5Z)-7-Oxozeaenol 1242	1242	11	15	LIHC	0.0495598	0.137616	0.3575
loss:cnaLIHC7 (CDKN2A)	(5Z)-7-Oxozeaenol 1242	1242	4	15	LIHC	0.0116089	0.124266	0.47875
loss:cnaLIHC10 (RB1)	(5Z)-7-Oxozeaenol 1242	1242	2	15	LIHC	-0.00679206	0.124252	0.47125
ARID1A	(5Z)-7-Oxozeaenol 1242	1242	4	60	LUAD	-0.00377697	0.101066	0.475
BRAF	(5Z)-7-Oxozeaenol 1242	1242	3	60	LUAD	0.0204052	0.129081	0.43375
EGFR	(5Z)-7-Oxozeaenol 1242	1242	5	60	LUAD	-0.00389454	0.0983253	0.48375
KDR	(5Z)-7-Oxozeaenol 1242	1242	3	60	LUAD	0.0396651	0.135171	0.39875
KRAS	(5Z)-7-Oxozeaenol 1242	1242	20	60	LUAD	-0.0691341	0.117522	0.27625
MGA	(5Z)-7-Oxozeaenol 1242	1242	3	60	LUAD	0.0060475	0.121376	0.48875
NF1	(5Z)-7-Oxozeaenol 1242	1242	3	60	LUAD	0.007082	0.103544	0.46375
RBM10	(5Z)-7-Oxozeaenol 1242	1242	3	60	LUAD	0.0158261	0.121601	0.44875
SMARCA4	(5Z)-7-Oxozeaenol 1242	1242	13	60	LUAD	-0.0276877	0.0924474	0.4
STK11	(5Z)-7-Oxozeaenol 1242	1242	11	60	LUAD	-0.0350005	0.0984396	0.3825
SVEP1	(5Z)-7-Oxozeaenol 1242	1242	3	60	LUAD	0.0140152	0.134899	0.46375
TP53	(5Z)-7-Oxozeaenol 1242	1242	48	60	LUAD	0.0333829	0.0904114	0.3725
U2AF1	(5Z)-7-Oxozeaenol 1242	1242	3	60	LUAD	0.00658305	0.107244	0.48
loss:cnaLUAD1 (CDKN2A)	(5Z)-7-Oxozeaenol 1242	1242	36	60	LUAD	0.02361	0.0807595	0.40875
loss:cnaLUAD2 (PAX5)	(5Z)-7-Oxozeaenol 1242	1242	5	60	LUAD	0.0279535	0.128972	0.4325
gain:cnaLUAD3 (TERT)	(5Z)-7-Oxozeaenol 1242	1242	10	60	LUAD	-0.0511697	0.113901	0.3575
gain:cnaLUAD5 (CUL2,EPC1)	(5Z)-7-Oxozeaenol 1242	1242	4	60	LUAD	-0.00489022	0.102813	0.48625
loss:cnaLUAD6 (SMARCA4)	(5Z)-7-Oxozeaenol 1242	1242	5	60	LUAD	0.046766	0.144813	0.40625
loss:cnaLUAD7	(5Z)-7-Oxozeaenol 1242	1242	4	60	LUAD	0.0634552	0.16578	0.35875
loss:cnaLUAD9	(5Z)-7-Oxozeaenol 1242	1242	3	60	LUAD	0.0212913	0.117247	0.43875
gain:cnaLUAD10 (AHR,HDAC9)	(5Z)-7-Oxozeaenol 1242	1242	8	60	LUAD	0.0285642	0.110202	0.405
gain:cnaLUAD11 (EGFR)	(5Z)-7-Oxozeaenol 1242	1242	10	60	LUAD	0.027231	0.0987132	0.42125
gain:cnaLUAD12	(5Z)-7-Oxozeaenol 1242	1242	5	60	LUAD	0.00259045	0.107133	0.48
gain:cnaLUAD13 (MET)	(5Z)-7-Oxozeaenol 1242	1242	6	60	LUAD	0.0229074	0.105195	0.4275
loss:cnaLUAD14	(5Z)-7-Oxozeaenol 1242	1242	7	60	LUAD	0.0240922	0.10941	0.44375
loss:cnaLUAD15	(5Z)-7-Oxozeaenol 1242	1242	7	60	LUAD	-0.00980828	0.100172	0.4725
loss:cnaLUAD16	(5Z)-7-Oxozeaenol 1242	1242	7	60	LUAD	0.00543142	0.0953185	0.44875
gain:cnaLUAD17 (KRAS)	(5Z)-7-Oxozeaenol 1242	1242	5	60	LUAD	-0.0378397	0.111864	0.395
gain:cnaLUAD18	(5Z)-7-Oxozeaenol 1242	1242	7	60	LUAD	-0.00995527	0.104756	0.49625
gain:cnaLUAD19 (CDK4)	(5Z)-7-Oxozeaenol 1242	1242	6	60	LUAD	0.0200424	0.102704	0.415
gain:cnaLUAD21 (FOXA2)	(5Z)-7-Oxozeaenol 1242	1242	8	60	LUAD	-0.0273286	0.11169	0.42875
gain:cnaLUAD22 (ASXL1)	(5Z)-7-Oxozeaenol 1242	1242	8	60	LUAD	0.0494209	0.134079	0.365
gain:cnaLUAD23 (ARFGAP1)	(5Z)-7-Oxozeaenol 1242	1242	4	60	LUAD	0.00276489	0.102436	0.4725
loss:cnaLUAD25	(5Z)-7-Oxozeaenol 1242	1242	4	60	LUAD	0.0063476	0.105543	0.49375
gain:cnaLUAD27 (MYC)	(5Z)-7-Oxozeaenol 1242	1242	16	60	LUAD	-0.0134359	0.0895034	0.48
loss:cnaLUAD28	(5Z)-7-Oxozeaenol 1242	1242	11	60	LUAD	0.0239598	0.0943405	0.42625
loss:cnaLUAD29 (TFDP1)	(5Z)-7-Oxozeaenol 1242	1242	10	60	LUAD	0.0295544	0.10202	0.39
gain:cnaLUAD30 (CCND1)	(5Z)-7-Oxozeaenol 1242	1242	6	60	LUAD	-0.0444872	0.112736	0.35125
loss:cnaLUAD31	(5Z)-7-Oxozeaenol 1242	1242	4	60	LUAD	0.0137816	0.116659	0.46125
gain:cnaLUAD32	(5Z)-7-Oxozeaenol 1242	1242	3	60	LUAD	0.007896	0.107769	0.45875
loss:cnaLUAD34 (FAT1,IRF2)	(5Z)-7-Oxozeaenol 1242	1242	19	60	LUAD	0.0291901	0.0903549	0.39625
gain:cnaLUAD35 (MECOM)	(5Z)-7-Oxozeaenol 1242	1242	4	60	LUAD	-0.0138823	0.107518	0.46375
MLL2	(5Z)-7-Oxozeaenol 1242	1242	3	15	LUSC	-0.0345032	0.127766	0.3925
loss:cnaLUSC3	(5Z)-7-Oxozeaenol 1242	1242	7	15	LUSC	-0.0068556	0.106114	0.48625
loss:cnaLUSC4	(5Z)-7-Oxozeaenol 1242	1242	7	15	LUSC	-0.0264624	0.117353	0.44625
gain:cnaLUSC6 (FGFR1,WHSC1L1)	(5Z)-7-Oxozeaenol 1242	1242	3	15	LUSC	-0.0147373	0.10748	0.4625
gain:cnaLUSC7 (MYC)	(5Z)-7-Oxozeaenol 1242	1242	3	15	LUSC	-0.010646	0.101404	0.475
loss:cnaLUSC8	(5Z)-7-Oxozeaenol 1242	1242	3	15	LUSC	0.0181569	0.117176	0.4375
loss:cnaLUSC10 (CDKN2A)	(5Z)-7-Oxozeaenol 1242	1242	10	15	LUSC	0.0173559	0.121021	0.46375
gain:cnaLUSC14 (CCT5,TERT,TRIO)	(5Z)-7-Oxozeaenol 1242	1242	5	15	LUSC	-0.00637058	0.109872	0.44625
loss:cnaLUSC16	(5Z)-7-Oxozeaenol 1242	1242	3	15	LUSC	0.0243627	0.12276	0.44125
loss:cnaLUSC17 (FAT1,IRF2)	(5Z)-7-Oxozeaenol 1242	1242	6	15	LUSC	0.043025	0.136502	0.38375
gain:cnaLUSC25	(5Z)-7-Oxozeaenol 1242	1242	4	15	LUSC	0.0148458	0.12002	0.46375
gain:cnaLUSC26 (SOX2)	(5Z)-7-Oxozeaenol 1242	1242	3	15	LUSC	0.0457778	0.142644	0.36375
gain:cnaLUSC30	(5Z)-7-Oxozeaenol 1242	1242	3	15	LUSC	0.0619722	0.153035	0.36375
gain:cnaLUSC32 (BCL11A,REL,XPO1)	(5Z)-7-Oxozeaenol 1242	1242	3	15	LUSC	0.0681423	0.17325	0.36125
gain:cnaLUSC37	(5Z)-7-Oxozeaenol 1242	1242	3	15	LUSC	-0.0146186	0.129675	0.47875
gain:cnaLUSC41 (AKAP9)	(5Z)-7-Oxozeaenol 1242	1242	4	15	LUSC	-0.0185215	0.118314	0.46625
loss:cnaLUSC51	(5Z)-7-Oxozeaenol 1242	1242	7	15	LUSC	0.0240327	0.118656	0.41375
loss:cnaLUSC54	(5Z)-7-Oxozeaenol 1242	1242	7	15	LUSC	-0.0280789	0.120018	0.43625
ARID1A	(5Z)-7-Oxozeaenol 1242	1242	9	32	OV	-0.00771746	0.0999729	0.48
BRCA1	(5Z)-7-Oxozeaenol 1242	1242	3	32	OV	0.0221673	0.1226	0.435
KRAS	(5Z)-7-Oxozeaenol 1242	1242	7	32	OV	-0.0823475	0.14596	0.3025
MLL2	(5Z)-7-Oxozeaenol 1242	1242	3	32	OV	-0.0167428	0.123525	0.44875
NF1	(5Z)-7-Oxozeaenol 1242	1242	4	32	OV	-0.0242076	0.114261	0.4275
PIK3CA	(5Z)-7-Oxozeaenol 1242	1242	7	32	OV	-0.00813698	0.103555	0.4925
PIK3R1	(5Z)-7-Oxozeaenol 1242	1242	5	32	OV	-0.000992503	0.102825	0.47875
PTEN	(5Z)-7-Oxozeaenol 1242	1242	4	32	OV	-0.0114271	0.104662	0.455
RB1	(5Z)-7-Oxozeaenol 1242	1242	3	32	OV	0.0054108	0.112034	0.47375
SMAD4	(5Z)-7-Oxozeaenol 1242	1242	4	32	OV	0.0362712	0.116548	0.3975
SMARCA4	(5Z)-7-Oxozeaenol 1242	1242	3	32	OV	-0.0225024	0.119228	0.445
TP53	(5Z)-7-Oxozeaenol 1242	1242	22	32	OV	0.0929386	0.167648	0.29
loss:cnaOV1	(5Z)-7-Oxozeaenol 1242	1242	3	32	OV	-0.00608834	0.106539	0.4725
gain:cnaOV4 (KRAS)	(5Z)-7-Oxozeaenol 1242	1242	7	32	OV	0.0593157	0.14131	0.34375
loss:cnaOV16	(5Z)-7-Oxozeaenol 1242	1242	6	32	OV	0.000726419	0.102062	0.48625
loss:cnaOV17	(5Z)-7-Oxozeaenol 1242	1242	6	32	OV	-0.000848094	0.0962749	0.48875
gain:cnaOV18 (CCNE1)	(5Z)-7-Oxozeaenol 1242	1242	4	32	OV	0.0535907	0.142805	0.36
gain:cnaOV19	(5Z)-7-Oxozeaenol 1242	1242	3	32	OV	0.036343	0.139339	0.41125
loss:cnaOV20	(5Z)-7-Oxozeaenol 1242	1242	5	32	OV	0.0320264	0.140069	0.44125
loss:cnaOV21	(5Z)-7-Oxozeaenol 1242	1242	3	32	OV	-0.000809814	0.124964	0.49125
loss:cnaOV22	(5Z)-7-Oxozeaenol 1242	1242	3	32	OV	0.00458732	0.11411	0.495
gain:cnaOV26	(5Z)-7-Oxozeaenol 1242	1242	3	32	OV	0.0379912	0.135446	0.41375
loss:cnaOV27	(5Z)-7-Oxozeaenol 1242	1242	5	32	OV	0.0465489	0.132398	0.37375
loss:cnaOV28	(5Z)-7-Oxozeaenol 1242	1242	5	32	OV	0.0450254	0.140627	0.39625
loss:cnaOV29	(5Z)-7-Oxozeaenol 1242	1242	5	32	OV	0.043413	0.126995	0.39625
loss:cnaOV30	(5Z)-7-Oxozeaenol 1242	1242	5	32	OV	0.0503253	0.147258	0.3775
loss:cnaOV33 (ZFHX3)	(5Z)-7-Oxozeaenol 1242	1242	4	32	OV	-0.0181447	0.115234	0.4625
loss:cnaOV34	(5Z)-7-Oxozeaenol 1242	1242	5	32	OV	-0.0216837	0.110934	0.41875
loss:cnaOV35	(5Z)-7-Oxozeaenol 1242	1242	5	32	OV	0.00969884	0.110863	0.4725
loss:cnaOV36	(5Z)-7-Oxozeaenol 1242	1242	3	32	OV	-0.00837489	0.122894	0.47125
loss:cnaOV38	(5Z)-7-Oxozeaenol 1242	1242	8	32	OV	0.00286097	0.0912394	0.4925
loss:cnaOV39	(5Z)-7-Oxozeaenol 1242	1242	9	32	OV	-0.0191368	0.0959351	0.4275
loss:cnaOV40	(5Z)-7-Oxozeaenol 1242	1242	7	32	OV	0.0132324	0.0906582	0.45
loss:cnaOV41	(5Z)-7-Oxozeaenol 1242	1242	5	32	OV	0.0184579	0.108757	0.4525
loss:cnaOV42	(5Z)-7-Oxozeaenol 1242	1242	4	32	OV	0.0138128	0.11789	0.46
loss:cnaOV43 (NF1)	(5Z)-7-Oxozeaenol 1242	1242	5	32	OV	0.0335115	0.117163	0.425
loss:cnaOV44	(5Z)-7-Oxozeaenol 1242	1242	3	32	OV	0.0112466	0.117524	0.46
gain:cnaOV48 (SOX17)	(5Z)-7-Oxozeaenol 1242	1242	3	32	OV	-0.0392205	0.137545	0.4125
gain:cnaOV49	(5Z)-7-Oxozeaenol 1242	1242	3	32	OV	-0.0402431	0.122394	0.40375
gain:cnaOV50	(5Z)-7-Oxozeaenol 1242	1242	4	32	OV	-0.0221614	0.113926	0.42125
gain:cnaOV51 (MYC)	(5Z)-7-Oxozeaenol 1242	1242	8	32	OV	0.00460052	0.0998696	0.47625
loss:cnaOV52	(5Z)-7-Oxozeaenol 1242	1242	8	32	OV	0.0352496	0.120836	0.4075
loss:cnaOV53	(5Z)-7-Oxozeaenol 1242	1242	8	32	OV	0.0425569	0.114743	0.37875
loss:cnaOV54	(5Z)-7-Oxozeaenol 1242	1242	10	32	OV	0.000133543	0.100361	0.49125
loss:cnaOV55	(5Z)-7-Oxozeaenol 1242	1242	7	32	OV	0.0258237	0.114763	0.43875
loss:cnaOV56	(5Z)-7-Oxozeaenol 1242	1242	3	32	OV	0.0123524	0.124073	0.47
loss:cnaOV57 (ZNRF3)	(5Z)-7-Oxozeaenol 1242	1242	4	32	OV	0.0117534	0.114356	0.47875
loss:cnaOV58	(5Z)-7-Oxozeaenol 1242	1242	5	32	OV	0.0205876	0.107831	0.43
loss:cnaOV59	(5Z)-7-Oxozeaenol 1242	1242	4	32	OV	0.0642695	0.165012	0.37375
loss:cnaOV61	(5Z)-7-Oxozeaenol 1242	1242	3	32	OV	0.0418897	0.123049	0.3675
loss:cnaOV62	(5Z)-7-Oxozeaenol 1242	1242	3	32	OV	0.0473827	0.141901	0.38375
loss:cnaOV63	(5Z)-7-Oxozeaenol 1242	1242	3	32	OV	0.0436439	0.137642	0.39625
loss:cnaOV64 (ARID1B,MAP3K4,MLLT4)	(5Z)-7-Oxozeaenol 1242	1242	7	32	OV	0.0330803	0.11956	0.4025
loss:cnaOV70	(5Z)-7-Oxozeaenol 1242	1242	3	32	OV	-0.0353141	0.132863	0.40125
gain:cnaOV72 (ASXL1)	(5Z)-7-Oxozeaenol 1242	1242	5	32	OV	0.0446063	0.130842	0.40875
loss:cnaOV81 (RB1)	(5Z)-7-Oxozeaenol 1242	1242	4	32	OV	0.013454	0.116106	0.4725
loss:cnaOV82	(5Z)-7-Oxozeaenol 1242	1242	3	32	OV	-0.0187189	0.133814	0.47
loss:cnaOV83	(5Z)-7-Oxozeaenol 1242	1242	5	32	OV	0.0359946	0.134934	0.42625
loss:cnaOV84	(5Z)-7-Oxozeaenol 1242	1242	6	32	OV	0.0255258	0.114589	0.42125
loss:cnaOV85	(5Z)-7-Oxozeaenol 1242	1242	7	32	OV	0.0406753	0.127263	0.385
loss:cnaOV87	(5Z)-7-Oxozeaenol 1242	1242	3	32	OV	0.0426825	0.147913	0.4075
loss:cnaOV88	(5Z)-7-Oxozeaenol 1242	1242	3	32	OV	0.048556	0.146277	0.37875
gain:cnaOV94	(5Z)-7-Oxozeaenol 1242	1242	7	32	OV	-0.0128243	0.100832	0.415
gain:cnaOV95 (MECOM)	(5Z)-7-Oxozeaenol 1242	1242	8	32	OV	0.0022737	0.0954818	0.4975
gain:cnaOV96	(5Z)-7-Oxozeaenol 1242	1242	4	32	OV	0.0351243	0.120506	0.39875
loss:cnaOV102	(5Z)-7-Oxozeaenol 1242	1242	3	32	OV	0.0824319	0.19734	0.35625
ARID1A	(5Z)-7-Oxozeaenol 1242	1242	3	27	PAAD	0.00634531	0.118039	0.48875
CDKN2A	(5Z)-7-Oxozeaenol 1242	1242	4	27	PAAD	0.0106604	0.125504	0.4775
EP300	(5Z)-7-Oxozeaenol 1242	1242	3	27	PAAD	-0.02411	0.120043	0.4525
RNF43	(5Z)-7-Oxozeaenol 1242	1242	4	27	PAAD	-0.00454376	0.12816	0.46125
SMAD4	(5Z)-7-Oxozeaenol 1242	1242	7	27	PAAD	0.013464	0.109679	0.4875
TP53	(5Z)-7-Oxozeaenol 1242	1242	22	27	PAAD	-0.0368797	0.126425	0.40875
gain:cnaPAAD2 (KRAS)	(5Z)-7-Oxozeaenol 1242	1242	10	27	PAAD	-0.0128396	0.108171	0.47625
gain:cnaPAAD3	(5Z)-7-Oxozeaenol 1242	1242	4	27	PAAD	0.000475652	0.101579	0.47625
loss:cnaPAAD4 (CDKN2A)	(5Z)-7-Oxozeaenol 1242	1242	14	27	PAAD	0.0103147	0.110733	0.46875
ARID2	(5Z)-7-Oxozeaenol 1242	1242	5	51	SKCM	0.0147015	0.114618	0.4825
BRAF	(5Z)-7-Oxozeaenol 1242	1242	38	51	SKCM	-0.36969	0.318798	0.11
CDKN2A	(5Z)-7-Oxozeaenol 1242	1242	6	51	SKCM	0.0454619	0.138574	0.38125
MECOM	(5Z)-7-Oxozeaenol 1242	1242	3	51	SKCM	0.0331238	0.139776	0.44125
NF1	(5Z)-7-Oxozeaenol 1242	1242	4	51	SKCM	0.068377	0.166847	0.34375
NRAS	(5Z)-7-Oxozeaenol 1242	1242	11	51	SKCM	0.164748	0.222814	0.2025
PTEN	(5Z)-7-Oxozeaenol 1242	1242	4	51	SKCM	-0.0233367	0.122477	0.4625
TP53	(5Z)-7-Oxozeaenol 1242	1242	15	51	SKCM	0.00992118	0.0951338	0.4675
loss:cnaSKCM3	(5Z)-7-Oxozeaenol 1242	1242	8	51	SKCM	0.126983	0.207128	0.2675
loss:cnaSKCM4 (BNC2,CDKN2A,JAK2,PSIP1)	(5Z)-7-Oxozeaenol 1242	1242	37	51	SKCM	-0.0971263	0.165343	0.29625
loss:cnaSKCM5 (PAX5)	(5Z)-7-Oxozeaenol 1242	1242	4	51	SKCM	-0.0137014	0.111577	0.48625
loss:cnaSKCM9	(5Z)-7-Oxozeaenol 1242	1242	4	51	SKCM	0.0311729	0.13243	0.43
gain:cnaSKCM12 (KRAS)	(5Z)-7-Oxozeaenol 1242	1242	7	51	SKCM	0.0419003	0.127015	0.40375
gain:cnaSKCM21 (FOXP1,MITF)	(5Z)-7-Oxozeaenol 1242	1242	8	51	SKCM	-0.0467381	0.122923	0.375
loss:cnaSKCM22	(5Z)-7-Oxozeaenol 1242	1242	6	51	SKCM	-0.0497573	0.142417	0.40625
loss:cnaSKCM23	(5Z)-7-Oxozeaenol 1242	1242	4	51	SKCM	-0.0190666	0.116324	0.45875
loss:cnaSKCM24	(5Z)-7-Oxozeaenol 1242	1242	8	51	SKCM	-0.0101294	0.101853	0.45
loss:cnaSKCM25	(5Z)-7-Oxozeaenol 1242	1242	8	51	SKCM	-0.00979531	0.106122	0.4925
loss:cnaSKCM26	(5Z)-7-Oxozeaenol 1242	1242	3	51	SKCM	-0.000278607	0.134072	0.4625
loss:cnaSKCM27 (CASP1)	(5Z)-7-Oxozeaenol 1242	1242	7	51	SKCM	0.0555333	0.143697	0.3725
loss:cnaSKCM28	(5Z)-7-Oxozeaenol 1242	1242	7	51	SKCM	0.0230865	0.108335	0.41375
loss:cnaSKCM30	(5Z)-7-Oxozeaenol 1242	1242	4	51	SKCM	-0.0150005	0.125131	0.4375
ARID1A	(5Z)-7-Oxozeaenol 1242	1242	4	20	STAD	0.0197134	0.0964835	0.4225
BCOR	(5Z)-7-Oxozeaenol 1242	1242	3	20	STAD	0.0650375	0.161648	0.375
PIK3CA	(5Z)-7-Oxozeaenol 1242	1242	3	20	STAD	0.0102081	0.113333	0.48
TP53	(5Z)-7-Oxozeaenol 1242	1242	14	20	STAD	-0.0195021	0.10417	0.45875
loss:cnaSTAD3	(5Z)-7-Oxozeaenol 1242	1242	4	20	STAD	0.0634686	0.159013	0.35125
loss:cnaSTAD7	(5Z)-7-Oxozeaenol 1242	1242	4	20	STAD	0.0231037	0.119393	0.42125
loss:cnaSTAD11	(5Z)-7-Oxozeaenol 1242	1242	4	20	STAD	0.014685	0.111492	0.485
loss:cnaSTAD12	(5Z)-7-Oxozeaenol 1242	1242	4	20	STAD	-0.014164	0.11251	0.4375
loss:cnaSTAD13	(5Z)-7-Oxozeaenol 1242	1242	11	20	STAD	-0.00218893	0.102361	0.48375
loss:cnaSTAD16	(5Z)-7-Oxozeaenol 1242	1242	9	20	STAD	-0.00922752	0.104729	0.4975
loss:cnaSTAD17 (CDKN2A)	(5Z)-7-Oxozeaenol 1242	1242	8	20	STAD	-0.0109376	0.104969	0.45375
gain:cnaSTAD26 (MYC)	(5Z)-7-Oxozeaenol 1242	1242	5	20	STAD	-0.015758	0.103949	0.45
loss:cnaSTAD27 (MAP2K4)	(5Z)-7-Oxozeaenol 1242	1242	4	20	STAD	0.0227437	0.120103	0.45
gain:cnaSTAD29 (STK4)	(5Z)-7-Oxozeaenol 1242	1242	3	20	STAD	-0.00189377	0.102357	0.475
loss:cnaSTAD30	(5Z)-7-Oxozeaenol 1242	1242	10	20	STAD	-0.00617534	0.102585	0.4975
loss:cnaSTAD41	(5Z)-7-Oxozeaenol 1242	1242	13	20	STAD	0.0327223	0.114567	0.42875
loss:cnaSTAD42	(5Z)-7-Oxozeaenol 1242	1242	3	20	STAD	-0.00746795	0.119685	0.49875
gain:cnaSTAD45 (MET)	(5Z)-7-Oxozeaenol 1242	1242	3	20	STAD	0.019526	0.120873	0.475
loss:cnaSTAD47	(5Z)-7-Oxozeaenol 1242	1242	8	20	STAD	-0.00757017	0.10055	0.47625
loss:cnaSTAD48 (FAT1,IRF2)	(5Z)-7-Oxozeaenol 1242	1242	9	20	STAD	0.0136568	0.103465	0.44
loss:cnaSTAD51	(5Z)-7-Oxozeaenol 1242	1242	3	20	STAD	0.0445443	0.153223	0.38
BRAF	(5Z)-7-Oxozeaenol 1242	1242	7	16	THCA	-0.133568	0.233166	0.2925
NRAS	(5Z)-7-Oxozeaenol 1242	1242	3	16	THCA	0.022347	0.128478	0.46
TP53	(5Z)-7-Oxozeaenol 1242	1242	11	16	THCA	0.0119026	0.114986	0.4875
ARID1A	17-AAG 1026	1026	5	15	BLCA	0.00187765	0.11184	0.4975
EP300	17-AAG 1026	1026	4	15	BLCA	0.0363445	0.130717	0.42375
MLL2	17-AAG 1026	1026	3	15	BLCA	0.0207174	0.118201	0.44125
NRAS	17-AAG 1026	1026	3	15	BLCA	0.0859786	0.185223	0.34625
RB1	17-AAG 1026	1026	5	15	BLCA	0.0123063	0.108893	0.4525
TP53	17-AAG 1026	1026	11	15	BLCA	-0.0419341	0.125543	0.37
loss:cnaBLCA5 (FAT1,IRF2)	17-AAG 1026	1026	3	15	BLCA	-0.0101631	0.117302	0.47875
gain:cnaBLCA9	17-AAG 1026	1026	3	15	BLCA	-0.0358027	0.125642	0.4075
gain:cnaBLCA15 (ASXL1)	17-AAG 1026	1026	4	15	BLCA	0.00849845	0.11007	0.45875
loss:cnaBLCA18 (CHD9,CNOT1,CYLD,MMP2,NUP93)	17-AAG 1026	1026	3	15	BLCA	-0.000710308	0.110225	0.48375
gain:cnaBLCA23 (MYC)	17-AAG 1026	1026	3	15	BLCA	0.00828336	0.115971	0.465
ARID1A	17-AAG 1026	1026	4	43	BRCA	-0.0146579	0.104202	0.46375
ASH1L	17-AAG 1026	1026	3	43	BRCA	0.0115471	0.112431	0.48875
BRCA1	17-AAG 1026	1026	4	43	BRCA	0.0212443	0.117175	0.445
BRCA2	17-AAG 1026	1026	5	43	BRCA	-0.00646781	0.107661	0.485
CDH1	17-AAG 1026	1026	4	43	BRCA	0.00736617	0.117771	0.485
MACF1	17-AAG 1026	1026	3	43	BRCA	-0.0200564	0.117256	0.43125
MLL3	17-AAG 1026	1026	3	43	BRCA	0.120895	0.250513	0.30625
NF1	17-AAG 1026	1026	4	43	BRCA	0.056114	0.152161	0.37
PIK3CA	17-AAG 1026	1026	15	43	BRCA	-0.0307976	0.102397	0.41375
POLR2B	17-AAG 1026	1026	3	43	BRCA	-0.0182559	0.119844	0.45375
PTEN	17-AAG 1026	1026	6	43	BRCA	-0.0152252	0.0955112	0.465
TP53	17-AAG 1026	1026	34	43	BRCA	-0.0191859	0.104503	0.4425
gain:cnaBRCA5 (GATA3,KLF6,LARP4B,VIM)	17-AAG 1026	1026	4	43	BRCA	0.0257249	0.127409	0.42375
loss:cnaBRCA7 (FAS,PTEN)	17-AAG 1026	1026	4	43	BRCA	0.0624316	0.150121	0.3475
gain:cnaBRCA8 (CHD4,WNK1)	17-AAG 1026	1026	3	43	BRCA	0.0462529	0.156328	0.39625
gain:cnaBRCA9 (KRAS)	17-AAG 1026	1026	4	43	BRCA	-0.00384928	0.106802	0.48625
gain:cnaBRCA10 (MDM2,NUP107)	17-AAG 1026	1026	3	43	BRCA	0.014086	0.117227	0.4525
gain:cnaBRCA12 (TERT)	17-AAG 1026	1026	9	43	BRCA	0.00990273	0.0918237	0.4625
gain:cnaBRCA13 (FGFR1,WHSC1L1)	17-AAG 1026	1026	8	43	BRCA	0.0319276	0.117921	0.4175
gain:cnaBRCA14 (RAD21)	17-AAG 1026	1026	19	43	BRCA	-0.00326133	0.0813444	0.49
gain:cnaBRCA15	17-AAG 1026	1026	20	43	BRCA	0.00170746	0.0775969	0.48125
gain:cnaBRCA16	17-AAG 1026	1026	14	43	BRCA	0.025557	0.105446	0.4175
loss:cnaBRCA17	17-AAG 1026	1026	6	43	BRCA	0.0557619	0.146584	0.36125
loss:cnaBRCA18	17-AAG 1026	1026	12	43	BRCA	0.0108929	0.078204	0.45875
gain:cnaBRCA19	17-AAG 1026	1026	3	43	BRCA	0.0143455	0.115075	0.45875
loss:cnaBRCA20	17-AAG 1026	1026	3	43	BRCA	0.0194046	0.118708	0.46875
loss:cnaBRCA22 (SYNCRIP,ZNF292)	17-AAG 1026	1026	16	43	BRCA	0.266557	0.243505	0.0925
loss:cnaBRCA25 (ARID1B,MAP3K4,MLLT4)	17-AAG 1026	1026	5	43	BRCA	0.0706034	0.15917	0.32125
gain:cnaBRCA26 (CDK12,ERBB2,MED24)	17-AAG 1026	1026	15	43	BRCA	-0.036279	0.0976422	0.38875
gain:cnaBRCA27 (CLTC,PPM1D)	17-AAG 1026	1026	10	43	BRCA	-0.0651374	0.131648	0.34
loss:cnaBRCA28 (GPS2)	17-AAG 1026	1026	3	43	BRCA	0.0178693	0.114653	0.46
loss:cnaBRCA29 (MAP2K4)	17-AAG 1026	1026	5	43	BRCA	0.0330187	0.114031	0.405
gain:cnaBRCA30 (CRNKL1,FOXA2)	17-AAG 1026	1026	4	43	BRCA	0.0144757	0.110389	0.4375
gain:cnaBRCA31	17-AAG 1026	1026	13	43	BRCA	-0.137802	0.176336	0.215
loss:cnaBRCA32 (PABPC3,SACS,ZMYM2)	17-AAG 1026	1026	8	43	BRCA	-0.0584794	0.127184	0.335
loss:cnaBRCA33	17-AAG 1026	1026	5	43	BRCA	0.0095959	0.102587	0.46875
loss:cnaBRCA34	17-AAG 1026	1026	5	43	BRCA	-0.0302284	0.108017	0.405
loss:cnaBRCA36 (FAT1,IRF2)	17-AAG 1026	1026	9	43	BRCA	-0.00916605	0.0961499	0.465
loss:cnaBRCA38	17-AAG 1026	1026	3	43	BRCA	-0.00887096	0.114134	0.46875
gain:cnaBRCA39 (FOXA1,NKX2-1,PSMA6)	17-AAG 1026	1026	6	43	BRCA	-0.0175133	0.0978076	0.42875
gain:cnaBRCA47 (EGFR)	17-AAG 1026	1026	6	43	BRCA	0.0373002	0.127292	0.40125
gain:cnaBRCA48	17-AAG 1026	1026	4	43	BRCA	-0.0166912	0.1094	0.43
loss:cnaBRCA57	17-AAG 1026	1026	5	43	BRCA	0.0382406	0.13312	0.3975
gain:cnaBRCA58 (CCND1)	17-AAG 1026	1026	8	43	BRCA	-0.0127223	0.0947483	0.46125
gain:cnaBRCA62	17-AAG 1026	1026	7	43	BRCA	0.0576201	0.137601	0.37125
gain:cnaBRCA63	17-AAG 1026	1026	5	43	BRCA	0.0330733	0.113769	0.40125
gain:cnaBRCA64 (SDHC)	17-AAG 1026	1026	7	43	BRCA	0.0114205	0.100598	0.45375
AKAP9	17-AAG 1026	1026	7	41	COREAD	0.0265414	0.111786	0.42625
APC	17-AAG 1026	1026	29	41	COREAD	0.0483859	0.108816	0.3525
ARID1A	17-AAG 1026	1026	8	41	COREAD	-0.0201407	0.0990759	0.4425
ARID2	17-AAG 1026	1026	5	41	COREAD	0.0145163	0.104572	0.4725
ASPM	17-AAG 1026	1026	6	41	COREAD	0.0107723	0.115567	0.48875
ATM	17-AAG 1026	1026	3	41	COREAD	0.0296088	0.131671	0.40125
ATRX	17-AAG 1026	1026	3	41	COREAD	-0.00837082	0.108748	0.49875
B2M	17-AAG 1026	1026	8	41	COREAD	0.0225448	0.108248	0.4375
BCOR	17-AAG 1026	1026	5	41	COREAD	0.0744284	0.160899	0.33125
BMPR2	17-AAG 1026	1026	13	41	COREAD	0.0268693	0.0968207	0.40125
BPTF	17-AAG 1026	1026	4	41	COREAD	0.00307544	0.10149	0.475
BRAF	17-AAG 1026	1026	11	41	COREAD	-0.0366241	0.10983	0.395
CHD4	17-AAG 1026	1026	3	41	COREAD	0.0146856	0.109738	0.46125
CHD9	17-AAG 1026	1026	7	41	COREAD	-0.0172369	0.109116	0.45125
CREBBP	17-AAG 1026	1026	7	41	COREAD	0.0236217	0.117091	0.43875
CTCF	17-AAG 1026	1026	6	41	COREAD	-0.00749036	0.0995663	0.45375
CTNNB1	17-AAG 1026	1026	6	41	COREAD	-0.039721	0.118959	0.415
DNMT3A	17-AAG 1026	1026	3	41	COREAD	0.0242365	0.125863	0.45125
EGFR	17-AAG 1026	1026	4	41	COREAD	-0.0361179	0.129051	0.4225
ELF3	17-AAG 1026	1026	3	41	COREAD	-0.017674	0.114009	0.45
EP300	17-AAG 1026	1026	12	41	COREAD	-0.00350433	0.0979291	0.475
FAM123B	17-AAG 1026	1026	4	41	COREAD	0.00832039	0.111027	0.48
FBXW7	17-AAG 1026	1026	10	41	COREAD	0.0443401	0.123308	0.3875
ITSN1	17-AAG 1026	1026	3	41	COREAD	0.00504689	0.112233	0.49625
KDM6A	17-AAG 1026	1026	3	41	COREAD	-0.0445171	0.129914	0.37625
KRAS	17-AAG 1026	1026	20	41	COREAD	0.0444442	0.106692	0.36625
LARP4B	17-AAG 1026	1026	4	41	COREAD	0.0115916	0.110832	0.4575
LPHN2	17-AAG 1026	1026	3	41	COREAD	0.0271016	0.136926	0.4625
MAP2K4	17-AAG 1026	1026	3	41	COREAD	0.0319369	0.131251	0.4175
MAP3K4	17-AAG 1026	1026	3	41	COREAD	-0.0268057	0.126681	0.41625
MECOM	17-AAG 1026	1026	4	41	COREAD	0.00787154	0.104164	0.45125
MGA	17-AAG 1026	1026	4	41	COREAD	0.0245349	0.122287	0.445
MLL2	17-AAG 1026	1026	12	41	COREAD	0.00755212	0.097149	0.46375
NCOR1	17-AAG 1026	1026	6	41	COREAD	-0.0342889	0.113156	0.4075
NF1	17-AAG 1026	1026	6	41	COREAD	-0.00720953	0.109415	0.46
NR4A2	17-AAG 1026	1026	5	41	COREAD	-0.0334798	0.121765	0.41
NUP98	17-AAG 1026	1026	5	41	COREAD	0.0169466	0.11378	0.44875
PBRM1	17-AAG 1026	1026	3	41	COREAD	0.0439535	0.148652	0.39125
PIK3CA	17-AAG 1026	1026	12	41	COREAD	-4.16938e-05	0.0922401	0.49875
PIK3R1	17-AAG 1026	1026	3	41	COREAD	0.052489	0.169998	0.3775
POLR2B	17-AAG 1026	1026	3	41	COREAD	0.0155555	0.115474	0.46625
PTEN	17-AAG 1026	1026	4	41	COREAD	0.00588001	0.103828	0.47875
RNF43	17-AAG 1026	1026	9	41	COREAD	-0.039797	0.114214	0.37
SACS	17-AAG 1026	1026	7	41	COREAD	-0.0227371	0.104744	0.42875
SMAD4	17-AAG 1026	1026	5	41	COREAD	-0.0228583	0.112258	0.42
SMARCA4	17-AAG 1026	1026	4	41	COREAD	0.0336785	0.122096	0.42125
SOS2	17-AAG 1026	1026	5	41	COREAD	0.103728	0.196575	0.31625
SOX9	17-AAG 1026	1026	5	41	COREAD	-0.000901109	0.102064	0.49875
TP53	17-AAG 1026	1026	30	41	COREAD	0.0907619	0.142284	0.25625
TP53BP1	17-AAG 1026	1026	3	41	COREAD	-0.0410057	0.141863	0.39875
TRIO	17-AAG 1026	1026	5	41	COREAD	0.118476	0.223289	0.2875
ZC3H11A	17-AAG 1026	1026	3	41	COREAD	-0.00308041	0.121967	0.4975
loss:cnaCOREAD11	17-AAG 1026	1026	16	41	COREAD	-0.0014964	0.090682	0.4975
loss:cnaCOREAD12 (PCDH18)	17-AAG 1026	1026	3	41	COREAD	0.00848762	0.112902	0.46375
loss:cnaCOREAD14	17-AAG 1026	1026	3	41	COREAD	0.000485191	0.122692	0.48
loss:cnaCOREAD18	17-AAG 1026	1026	9	41	COREAD	-0.0325639	0.10673	0.3875
loss:cnaCOREAD19	17-AAG 1026	1026	15	41	COREAD	-0.048092	0.117427	0.34875
loss:cnaCOREAD21	17-AAG 1026	1026	3	41	COREAD	-0.0067823	0.122608	0.4775
loss:cnaCOREAD24	17-AAG 1026	1026	10	41	COREAD	0.068223	0.147941	0.3525
loss:cnaCOREAD27 (MAP2K4)	17-AAG 1026	1026	3	41	COREAD	0.0256911	0.126639	0.415
loss:cnaCOREAD28 (SOX9)	17-AAG 1026	1026	3	41	COREAD	0.0237131	0.13674	0.43875
gain:cnaCOREAD31	17-AAG 1026	1026	5	41	COREAD	-0.00692958	0.102719	0.49125
gain:cnaCOREAD32 (STK4)	17-AAG 1026	1026	7	41	COREAD	0.00127735	0.10223	0.48625
loss:cnaCOREAD33	17-AAG 1026	1026	20	41	COREAD	-0.0065791	0.0925242	0.46875
gain:cnaCOREAD35 (FLT3,WASF3)	17-AAG 1026	1026	7	41	COREAD	-0.0165123	0.106675	0.44625
gain:cnaCOREAD36	17-AAG 1026	1026	3	41	COREAD	-0.021311	0.116296	0.4475
gain:cnaCOREAD37 (ING1,IRS2,TFDP1)	17-AAG 1026	1026	5	41	COREAD	-0.046745	0.123059	0.37375
loss:cnaCOREAD38 (CDKN2A)	17-AAG 1026	1026	5	41	COREAD	0.0289056	0.120007	0.4125
gain:cnaCOREAD47 (MYC)	17-AAG 1026	1026	5	41	COREAD	-0.0234315	0.111199	0.405
loss:cnaCOREAD48	17-AAG 1026	1026	4	41	COREAD	-0.00150568	0.112812	0.48375
loss:cnaCOREAD49	17-AAG 1026	1026	14	41	COREAD	0.0156227	0.0936948	0.4375
gain:cnaCOREAD51 (MET)	17-AAG 1026	1026	3	41	COREAD	-0.0306233	0.121534	0.4225
loss:cnaCOREAD54 (SMAD4)	17-AAG 1026	1026	10	41	COREAD	0.00177676	0.0973627	0.48375
loss:cnaCOREAD55	17-AAG 1026	1026	10	41	COREAD	0.00243723	0.0986564	0.49875
loss:cnaCOREAD56	17-AAG 1026	1026	10	41	COREAD	0.00237697	0.0920915	0.48125
loss:cnaCOREAD63 (APC)	17-AAG 1026	1026	6	41	COREAD	0.0835207	0.181353	0.3375
loss:cnaCOREAD65	17-AAG 1026	1026	26	41	COREAD	-0.0143962	0.0965306	0.44875
ARID1A	17-AAG 1026	1026	3	32	DLBC	-0.0244473	0.14282	0.44
CREBBP	17-AAG 1026	1026	7	32	DLBC	0.0273441	0.133946	0.4475
EP300	17-AAG 1026	1026	6	32	DLBC	0.00401215	0.120901	0.48625
MLL2	17-AAG 1026	1026	9	32	DLBC	0.0169287	0.118041	0.44875
PTEN	17-AAG 1026	1026	5	32	DLBC	-0.0635087	0.175163	0.33875
TP53	17-AAG 1026	1026	19	32	DLBC	0.00213666	0.114775	0.49375
loss:cnaDLBC2	17-AAG 1026	1026	3	32	DLBC	-0.0438277	0.167469	0.415
loss:cnaDLBC4 (CDKN2A)	17-AAG 1026	1026	8	32	DLBC	0.0272687	0.144494	0.45375
EP300	17-AAG 1026	1026	3	31	ESCA	-0.00763281	0.104187	0.47125
MLL2	17-AAG 1026	1026	3	31	ESCA	0.049026	0.140698	0.38125
NFE2L2	17-AAG 1026	1026	3	31	ESCA	-0.0169971	0.106955	0.465
NOTCH1	17-AAG 1026	1026	4	31	ESCA	0.00456879	0.0958028	0.4975
PIK3CA	17-AAG 1026	1026	4	31	ESCA	-0.0341752	0.120186	0.41625
SMAD4	17-AAG 1026	1026	4	31	ESCA	-0.0204159	0.109808	0.4525
loss:cnaESCA1	17-AAG 1026	1026	6	31	ESCA	-0.0158539	0.106758	0.44
gain:cnaESCA2 (KRAS)	17-AAG 1026	1026	3	31	ESCA	0.0300109	0.137338	0.45375
gain:cnaESCA3 (KRAS)	17-AAG 1026	1026	3	31	ESCA	0.0285045	0.134063	0.44625
loss:cnaESCA5 (PAX5)	17-AAG 1026	1026	3	31	ESCA	0.00209344	0.118008	0.48375
gain:cnaESCA7 (ERBB2)	17-AAG 1026	1026	10	31	ESCA	-0.0441317	0.118415	0.3775
gain:cnaESCA9 (EGFR)	17-AAG 1026	1026	7	31	ESCA	-0.017992	0.0982204	0.445
gain:cnaESCA11 (CCND1,CTTN)	17-AAG 1026	1026	14	31	ESCA	0.0229058	0.089989	0.42
loss:cnaESCA12	17-AAG 1026	1026	8	31	ESCA	0.00218453	0.0973573	0.485
loss:cnaESCA14	17-AAG 1026	1026	8	31	ESCA	0.0226617	0.101086	0.4
NF1	17-AAG 1026	1026	7	33	GBM	-0.0292295	0.104356	0.41375
PTEN	17-AAG 1026	1026	17	33	GBM	0.00511188	0.088473	0.4875
RB1	17-AAG 1026	1026	5	33	GBM	0.00713933	0.0969136	0.48125
TP53	17-AAG 1026	1026	19	33	GBM	-0.0353197	0.109324	0.395
loss:cnaGBM1	17-AAG 1026	1026	3	33	GBM	-0.0104647	0.104108	0.46375
loss:cnaGBM2 (CDKN2A)	17-AAG 1026	1026	24	33	GBM	-0.0248775	0.0985762	0.4225
loss:cnaGBM19 (FAT1,IRF2)	17-AAG 1026	1026	6	33	GBM	-0.0119399	0.0900411	0.46875
gain:cnaGBM25 (CDK4)	17-AAG 1026	1026	4	33	GBM	0.10764	0.196701	0.28625
loss:cnaGBM45	17-AAG 1026	1026	3	33	GBM	0.00887684	0.108193	0.4625
loss:cnaGBM47	17-AAG 1026	1026	5	33	GBM	0.00852795	0.113892	0.46
loss:cnaGBM68 (CDKN2C,FAF1)	17-AAG 1026	1026	5	33	GBM	-0.0460398	0.124167	0.37375
gain:cnaGBM71 (SOX2)	17-AAG 1026	1026	3	33	GBM	0.0341216	0.131627	0.42875
loss:cnaGBM93	17-AAG 1026	1026	5	33	GBM	0.0152905	0.0971746	0.44125
loss:cnaGBM94	17-AAG 1026	1026	5	33	GBM	0.027765	0.112674	0.43625
loss:cnaGBM95	17-AAG 1026	1026	5	33	GBM	0.0206607	0.10324	0.42875
loss:cnaGBM97	17-AAG 1026	1026	3	33	GBM	0.0111178	0.113631	0.47375
loss:cnaGBM98	17-AAG 1026	1026	3	33	GBM	0.00536953	0.110462	0.49375
loss:cnaGBM99 (ANK3)	17-AAG 1026	1026	3	33	GBM	0.00619978	0.117631	0.49625
loss:cnaGBM100	17-AAG 1026	1026	3	33	GBM	0.00953389	0.119569	0.47125
loss:cnaGBM101	17-AAG 1026	1026	4	33	GBM	0.00542788	0.0994452	0.48375
loss:cnaGBM102	17-AAG 1026	1026	3	33	GBM	0.0131894	0.121906	0.47375
loss:cnaGBM103	17-AAG 1026	1026	3	33	GBM	0.0139812	0.126077	0.46875
loss:cnaGBM104	17-AAG 1026	1026	3	33	GBM	0.00441628	0.112777	0.49375
loss:cnaGBM105	17-AAG 1026	1026	3	33	GBM	0.019053	0.120566	0.4475
loss:cnaGBM106	17-AAG 1026	1026	3	33	GBM	0.023171	0.12436	0.43375
gain:cnaGBM122	17-AAG 1026	1026	8	33	GBM	0.0337001	0.114332	0.39625
gain:cnaGBM123 (EGFR)	17-AAG 1026	1026	9	33	GBM	0.0258688	0.101495	0.4025
gain:cnaGBM124	17-AAG 1026	1026	3	33	GBM	0.0137714	0.109339	0.46375
gain:cnaGBM125 (AKAP9)	17-AAG 1026	1026	8	33	GBM	-0.011201	0.0914855	0.455
loss:cnaGBM132	17-AAG 1026	1026	3	33	GBM	0.03241	0.131245	0.41
loss:cnaGBM133	17-AAG 1026	1026	3	33	GBM	0.0277963	0.124825	0.4275
CASP8	17-AAG 1026	1026	5	34	HNSC	0.050673	0.122609	0.3375
CDKN2A	17-AAG 1026	1026	5	34	HNSC	0.0102034	0.101674	0.46375
FAT1	17-AAG 1026	1026	5	34	HNSC	-0.0180894	0.106973	0.4225
HLA-A	17-AAG 1026	1026	3	34	HNSC	0.0161327	0.105433	0.46375
NFE2L2	17-AAG 1026	1026	3	34	HNSC	-0.00816579	0.10569	0.45125
NSD1	17-AAG 1026	1026	3	34	HNSC	0.0273978	0.116412	0.4325
PIK3CA	17-AAG 1026	1026	7	34	HNSC	0.0245989	0.108937	0.4375
SMAD4	17-AAG 1026	1026	4	34	HNSC	0.00853255	0.105236	0.4825
TP53	17-AAG 1026	1026	30	34	HNSC	-0.0242195	0.110258	0.42125
gain:cnaHNSC1 (ACTB,CARD11,PMS2,RAC1)	17-AAG 1026	1026	5	34	HNSC	-0.0258428	0.108223	0.41875
gain:cnaHNSC2 (EGFR)	17-AAG 1026	1026	9	34	HNSC	-0.00872445	0.0862305	0.48
loss:cnaHNSC3	17-AAG 1026	1026	3	34	HNSC	-0.00273208	0.100893	0.485
loss:cnaHNSC6	17-AAG 1026	1026	15	34	HNSC	-0.00553369	0.0839296	0.48625
gain:cnaHNSC8	17-AAG 1026	1026	3	34	HNSC	-0.0137355	0.104942	0.46625
loss:cnaHNSC11 (CDKN2A)	17-AAG 1026	1026	13	34	HNSC	0.0321255	0.0978819	0.395
gain:cnaHNSC14 (ASXL1)	17-AAG 1026	1026	5	34	HNSC	-0.0165708	0.0952711	0.42125
gain:cnaHNSC17 (CCND1,CTTN)	17-AAG 1026	1026	11	34	HNSC	-0.0402965	0.103051	0.37375
loss:cnaHNSC19 (MED17)	17-AAG 1026	1026	4	34	HNSC	-0.00894611	0.0999414	0.465
loss:cnaHNSC20	17-AAG 1026	1026	16	34	HNSC	-0.0015272	0.0811351	0.48875
loss:cnaHNSC26	17-AAG 1026	1026	12	34	HNSC	-0.0217598	0.0924235	0.4325
loss:cnaHNSC28 (ATP1A1,CSDE1,NRAS)	17-AAG 1026	1026	3	34	HNSC	0.0515926	0.138569	0.3775
loss:cnaHNSC29	17-AAG 1026	1026	5	34	HNSC	-0.0114182	0.0879515	0.4725
loss:cnaHNSC32 (FAT1)	17-AAG 1026	1026	12	34	HNSC	0.00513068	0.0884361	0.47625
gain:cnaHNSC33	17-AAG 1026	1026	2	34	HNSC	0.0182694	0.118777	0.435
NF2	17-AAG 1026	1026	3	23	KIRC	-0.00320549	0.119796	0.49
PBRM1	17-AAG 1026	1026	6	23	KIRC	0.119696	0.210716	0.29125
SETD2	17-AAG 1026	1026	4	23	KIRC	0.030382	0.135996	0.425
TP53	17-AAG 1026	1026	8	23	KIRC	0.00745506	0.100354	0.46875
VHL	17-AAG 1026	1026	9	23	KIRC	-0.0228748	0.110324	0.425
loss:cnaKIRC3	17-AAG 1026	1026	3	23	KIRC	0.140868	0.285784	0.31125
loss:cnaKIRC4	17-AAG 1026	1026	3	23	KIRC	0.145089	0.308432	0.3
loss:cnaKIRC12	17-AAG 1026	1026	11	23	KIRC	0.118034	0.184254	0.23
loss:cnaKIRC13	17-AAG 1026	1026	11	23	KIRC	0.125633	0.197037	0.2725
loss:cnaKIRC14	17-AAG 1026	1026	11	23	KIRC	0.113953	0.188826	0.26875
loss:cnaKIRC15	17-AAG 1026	1026	11	23	KIRC	0.10955	0.177089	0.26875
loss:cnaKIRC16	17-AAG 1026	1026	6	23	KIRC	0.0417229	0.138287	0.42125
loss:cnaKIRC19	17-AAG 1026	1026	6	23	KIRC	0.00711653	0.115441	0.47375
loss:cnaKIRC22	17-AAG 1026	1026	8	23	KIRC	0.0772085	0.166529	0.32625
loss:cnaKIRC23	17-AAG 1026	1026	4	23	KIRC	0.0295864	0.132913	0.455
loss:cnaKIRC24 (FAT1,IRF2)	17-AAG 1026	1026	7	23	KIRC	0.0424569	0.126865	0.42
loss:cnaKIRC27	17-AAG 1026	1026	3	23	KIRC	-0.0184798	0.114174	0.4475
ASXL1	17-AAG 1026	1026	3	23	LAML	-0.0190653	0.13209	0.47625
CREBBP	17-AAG 1026	1026	3	23	LAML	0.0434936	0.142724	0.4075
NRAS	17-AAG 1026	1026	7	23	LAML	0.0426279	0.136146	0.3975
SACS	17-AAG 1026	1026	3	23	LAML	0.0741014	0.200973	0.37375
TP53	17-AAG 1026	1026	12	23	LAML	0.0330456	0.117506	0.41
RB1	17-AAG 1026	1026	6	15	LGG	-0.0122727	0.103017	0.46125
TP53	17-AAG 1026	1026	10	15	LGG	0.00661214	0.10291	0.4875
loss:cnaLGG1 (BNC2,CDKN2A,JAK2,PSIP1)	17-AAG 1026	1026	9	15	LGG	-0.0332926	0.113898	0.3875
loss:cnaLGG7 (RPL22)	17-AAG 1026	1026	3	15	LGG	0.0655343	0.170339	0.37
loss:cnaLGG14 (CUL2)	17-AAG 1026	1026	4	15	LGG	-0.000732143	0.0942948	0.47625
gain:cnaLGG16 (EGFR)	17-AAG 1026	1026	5	15	LGG	-0.0210013	0.117011	0.45125
TP53	17-AAG 1026	1026	10	13	LIHC	0.0128567	0.129279	0.4625
loss:cnaLIHC7 (CDKN2A)	17-AAG 1026	1026	4	13	LIHC	-0.00866835	0.124885	0.495
loss:cnaLIHC10 (RB1)	17-AAG 1026	1026	2	13	LIHC	0.00598734	0.128957	0.485
ARID1A	17-AAG 1026	1026	3	53	LUAD	-0.015499	0.12446	0.4475
EGFR	17-AAG 1026	1026	4	53	LUAD	-0.0314411	0.112161	0.395
KDR	17-AAG 1026	1026	3	53	LUAD	-0.00370635	0.104343	0.49875
KRAS	17-AAG 1026	1026	17	53	LUAD	-0.169551	0.16827	0.125
MGA	17-AAG 1026	1026	3	53	LUAD	-0.0182264	0.117063	0.445
RBM10	17-AAG 1026	1026	3	53	LUAD	-0.00239263	0.109016	0.48625
SMARCA4	17-AAG 1026	1026	11	53	LUAD	-0.00812388	0.0838771	0.47
STK11	17-AAG 1026	1026	9	53	LUAD	-0.0913283	0.136994	0.24375
TP53	17-AAG 1026	1026	43	53	LUAD	0.029972	0.100529	0.38625
loss:cnaLUAD1 (CDKN2A)	17-AAG 1026	1026	29	53	LUAD	-0.0838342	0.125423	0.235
loss:cnaLUAD2 (PAX5)	17-AAG 1026	1026	3	53	LUAD	0.0556428	0.155545	0.3675
gain:cnaLUAD3 (TERT)	17-AAG 1026	1026	11	53	LUAD	-0.0639207	0.114921	0.3225
gain:cnaLUAD5 (CUL2,EPC1)	17-AAG 1026	1026	4	53	LUAD	0.0659834	0.163138	0.34625
loss:cnaLUAD6 (SMARCA4)	17-AAG 1026	1026	4	53	LUAD	0.00101989	0.0950994	0.47875
loss:cnaLUAD9	17-AAG 1026	1026	3	53	LUAD	0.0491202	0.155739	0.38
gain:cnaLUAD10 (AHR,HDAC9)	17-AAG 1026	1026	7	53	LUAD	0.0234395	0.096651	0.40875
gain:cnaLUAD11 (EGFR)	17-AAG 1026	1026	8	53	LUAD	0.0754135	0.148475	0.315
gain:cnaLUAD12	17-AAG 1026	1026	4	53	LUAD	-0.0063386	0.0954939	0.49375
gain:cnaLUAD13 (MET)	17-AAG 1026	1026	5	53	LUAD	0.0534657	0.132089	0.36125
loss:cnaLUAD14	17-AAG 1026	1026	6	53	LUAD	0.0067041	0.0930411	0.46875
loss:cnaLUAD15	17-AAG 1026	1026	6	53	LUAD	0.0184903	0.0951536	0.42625
loss:cnaLUAD16	17-AAG 1026	1026	4	53	LUAD	0.0287547	0.110885	0.4025
gain:cnaLUAD17 (KRAS)	17-AAG 1026	1026	6	53	LUAD	-0.0296194	0.109005	0.40375
gain:cnaLUAD18	17-AAG 1026	1026	7	53	LUAD	0.0330617	0.106791	0.39125
gain:cnaLUAD19 (CDK4)	17-AAG 1026	1026	6	53	LUAD	0.062197	0.141311	0.34375
gain:cnaLUAD21 (FOXA2)	17-AAG 1026	1026	5	53	LUAD	0.01424	0.100571	0.475
gain:cnaLUAD22 (ASXL1)	17-AAG 1026	1026	6	53	LUAD	0.002959	0.096038	0.49875
gain:cnaLUAD23 (ARFGAP1)	17-AAG 1026	1026	4	53	LUAD	-0.059149	0.137903	0.34875
loss:cnaLUAD25	17-AAG 1026	1026	4	53	LUAD	0.0623832	0.172144	0.36875
gain:cnaLUAD27 (MYC)	17-AAG 1026	1026	15	53	LUAD	-0.0149015	0.0852749	0.4125
loss:cnaLUAD28	17-AAG 1026	1026	9	53	LUAD	-0.00712169	0.0940266	0.49375
loss:cnaLUAD29 (TFDP1)	17-AAG 1026	1026	8	53	LUAD	0.00709992	0.0956246	0.475
gain:cnaLUAD30 (CCND1)	17-AAG 1026	1026	7	53	LUAD	-0.0553265	0.121432	0.36
gain:cnaLUAD32	17-AAG 1026	1026	3	53	LUAD	0.0669106	0.174805	0.3625
loss:cnaLUAD34 (FAT1,IRF2)	17-AAG 1026	1026	17	53	LUAD	0.0994388	0.145489	0.235
gain:cnaLUAD35 (MECOM)	17-AAG 1026	1026	4	53	LUAD	0.0750055	0.165138	0.335
loss:cnaLUSC3	17-AAG 1026	1026	6	13	LUSC	0.00203846	0.112906	0.495
loss:cnaLUSC4	17-AAG 1026	1026	6	13	LUSC	-0.0184675	0.113569	0.465
loss:cnaLUSC8	17-AAG 1026	1026	3	13	LUSC	0.029228	0.122896	0.42875
loss:cnaLUSC10 (CDKN2A)	17-AAG 1026	1026	9	13	LUSC	-0.0129644	0.111889	0.44
gain:cnaLUSC14 (CCT5,TERT,TRIO)	17-AAG 1026	1026	4	13	LUSC	-0.0193895	0.121869	0.45625
loss:cnaLUSC16	17-AAG 1026	1026	3	13	LUSC	0.0222164	0.124147	0.445
loss:cnaLUSC17 (FAT1,IRF2)	17-AAG 1026	1026	6	13	LUSC	-0.0389598	0.12666	0.40875
gain:cnaLUSC25	17-AAG 1026	1026	3	13	LUSC	0.0375591	0.137208	0.4425
gain:cnaLUSC26 (SOX2)	17-AAG 1026	1026	3	13	LUSC	0.0405557	0.131745	0.3675
loss:cnaLUSC51	17-AAG 1026	1026	6	13	LUSC	0.0216139	0.121678	0.44
loss:cnaLUSC54	17-AAG 1026	1026	6	13	LUSC	0.0461797	0.157603	0.39625
ARID1A	17-AAG 1026	1026	9	33	OV	-0.0414837	0.105493	0.3725
BRCA1	17-AAG 1026	1026	4	33	OV	0.0718437	0.172884	0.3475
KRAS	17-AAG 1026	1026	7	33	OV	-0.163903	0.199247	0.21
MLL2	17-AAG 1026	1026	3	33	OV	-0.0757055	0.152452	0.31875
NF1	17-AAG 1026	1026	4	33	OV	-0.0822246	0.168459	0.31625
PIK3CA	17-AAG 1026	1026	7	33	OV	-0.0124031	0.0958939	0.48
PIK3R1	17-AAG 1026	1026	5	33	OV	-0.071057	0.144363	0.305
PTEN	17-AAG 1026	1026	4	33	OV	-0.0894566	0.163147	0.2825
RB1	17-AAG 1026	1026	3	33	OV	-0.0152534	0.104784	0.47375
SMAD4	17-AAG 1026	1026	4	33	OV	-0.0281095	0.129029	0.4425
SMARCA4	17-AAG 1026	1026	3	33	OV	-0.0257331	0.106432	0.42875
TP53	17-AAG 1026	1026	23	33	OV	0.0770444	0.1352	0.295
loss:cnaOV1	17-AAG 1026	1026	3	33	OV	-0.0140088	0.119342	0.46375
gain:cnaOV4 (KRAS)	17-AAG 1026	1026	7	33	OV	0.0701038	0.137118	0.30625
loss:cnaOV16	17-AAG 1026	1026	6	33	OV	0.0150001	0.112142	0.4475
loss:cnaOV17	17-AAG 1026	1026	6	33	OV	0.014872	0.100234	0.44875
gain:cnaOV18 (CCNE1)	17-AAG 1026	1026	4	33	OV	0.0754177	0.178523	0.34375
gain:cnaOV19	17-AAG 1026	1026	3	33	OV	0.0919036	0.194368	0.32375
loss:cnaOV20	17-AAG 1026	1026	5	33	OV	0.0226135	0.119132	0.43875
loss:cnaOV21	17-AAG 1026	1026	3	33	OV	-0.00820816	0.108067	0.46625
loss:cnaOV22	17-AAG 1026	1026	3	33	OV	-0.00711127	0.109138	0.465
gain:cnaOV26	17-AAG 1026	1026	3	33	OV	0.0240603	0.114839	0.4425
loss:cnaOV27	17-AAG 1026	1026	5	33	OV	0.0220186	0.117894	0.4225
loss:cnaOV28	17-AAG 1026	1026	5	33	OV	0.0224934	0.118272	0.445
loss:cnaOV29	17-AAG 1026	1026	5	33	OV	0.0211445	0.125614	0.44875
loss:cnaOV30	17-AAG 1026	1026	5	33	OV	0.0274315	0.106617	0.41625
loss:cnaOV33 (ZFHX3)	17-AAG 1026	1026	4	33	OV	0.0162163	0.107887	0.45125
loss:cnaOV34	17-AAG 1026	1026	5	33	OV	0.00816819	0.0975841	0.48625
loss:cnaOV35	17-AAG 1026	1026	5	33	OV	-0.0283938	0.108336	0.405
loss:cnaOV36	17-AAG 1026	1026	3	33	OV	0.0122342	0.107011	0.46375
loss:cnaOV38	17-AAG 1026	1026	8	33	OV	0.0235034	0.110075	0.44625
loss:cnaOV39	17-AAG 1026	1026	10	33	OV	0.0597618	0.128068	0.335
loss:cnaOV40	17-AAG 1026	1026	8	33	OV	0.0766383	0.160951	0.3275
loss:cnaOV41	17-AAG 1026	1026	5	33	OV	0.0557626	0.132546	0.35375
loss:cnaOV42	17-AAG 1026	1026	4	33	OV	0.0252202	0.109229	0.43375
loss:cnaOV43 (NF1)	17-AAG 1026	1026	5	33	OV	0.0938988	0.198053	0.31625
loss:cnaOV44	17-AAG 1026	1026	3	33	OV	0.0443971	0.134383	0.375
gain:cnaOV48 (SOX17)	17-AAG 1026	1026	3	33	OV	-0.0105905	0.107317	0.45375
gain:cnaOV49	17-AAG 1026	1026	3	33	OV	-0.0195198	0.116318	0.46375
gain:cnaOV50	17-AAG 1026	1026	4	33	OV	0.00492111	0.101415	0.45625
gain:cnaOV51 (MYC)	17-AAG 1026	1026	8	33	OV	0.040929	0.121105	0.39875
loss:cnaOV52	17-AAG 1026	1026	9	33	OV	0.0401535	0.121494	0.40875
loss:cnaOV53	17-AAG 1026	1026	9	33	OV	0.0358354	0.111375	0.3875
loss:cnaOV54	17-AAG 1026	1026	11	33	OV	0.0360327	0.101031	0.37
loss:cnaOV55	17-AAG 1026	1026	8	33	OV	0.0221589	0.111673	0.43375
loss:cnaOV56	17-AAG 1026	1026	3	33	OV	-0.0215962	0.117517	0.41625
loss:cnaOV57 (ZNRF3)	17-AAG 1026	1026	4	33	OV	-0.0483698	0.138197	0.3925
loss:cnaOV58	17-AAG 1026	1026	5	33	OV	-0.0248029	0.101548	0.43875
loss:cnaOV59	17-AAG 1026	1026	4	33	OV	-0.028739	0.100908	0.39625
loss:cnaOV61	17-AAG 1026	1026	3	33	OV	0.00257613	0.110218	0.4925
loss:cnaOV62	17-AAG 1026	1026	3	33	OV	0.000116663	0.106783	0.485
loss:cnaOV63	17-AAG 1026	1026	3	33	OV	-0.000560723	0.103082	0.48375
loss:cnaOV64 (ARID1B,MAP3K4,MLLT4)	17-AAG 1026	1026	8	33	OV	0.00806658	0.10582	0.45625
loss:cnaOV70	17-AAG 1026	1026	3	33	OV	0.0241953	0.116403	0.435
gain:cnaOV72 (ASXL1)	17-AAG 1026	1026	5	33	OV	0.0769991	0.168754	0.31875
loss:cnaOV81 (RB1)	17-AAG 1026	1026	4	33	OV	0.0895433	0.197512	0.3475
loss:cnaOV82	17-AAG 1026	1026	3	33	OV	0.0329874	0.127416	0.4225
loss:cnaOV83	17-AAG 1026	1026	5	33	OV	-0.00473808	0.102382	0.47375
loss:cnaOV84	17-AAG 1026	1026	6	33	OV	-0.0154615	0.113639	0.45875
loss:cnaOV85	17-AAG 1026	1026	7	33	OV	-0.00363649	0.106595	0.495
loss:cnaOV87	17-AAG 1026	1026	3	33	OV	0.0262176	0.120184	0.43
loss:cnaOV88	17-AAG 1026	1026	3	33	OV	0.0299675	0.124981	0.4075
gain:cnaOV94	17-AAG 1026	1026	7	33	OV	0.044459	0.125521	0.38375
gain:cnaOV95 (MECOM)	17-AAG 1026	1026	8	33	OV	0.0296029	0.101446	0.3925
gain:cnaOV96	17-AAG 1026	1026	4	33	OV	0.132509	0.252613	0.31375
loss:cnaOV102	17-AAG 1026	1026	3	33	OV	0.0739796	0.197803	0.3725
CDKN2A	17-AAG 1026	1026	3	23	PAAD	0.0474615	0.164263	0.4075
EP300	17-AAG 1026	1026	3	23	PAAD	-0.00914084	0.109548	0.44875
RNF43	17-AAG 1026	1026	3	23	PAAD	0.0389416	0.120414	0.395
SMAD4	17-AAG 1026	1026	6	23	PAAD	-0.0226342	0.106508	0.4425
gain:cnaPAAD2 (KRAS)	17-AAG 1026	1026	9	23	PAAD	0.0851976	0.155062	0.3175
loss:cnaPAAD4 (CDKN2A)	17-AAG 1026	1026	14	23	PAAD	-0.0128096	0.103942	0.46125
ARID2	17-AAG 1026	1026	3	43	SKCM	-0.0613105	0.153477	0.3525
BRAF	17-AAG 1026	1026	33	43	SKCM	-0.00819698	0.0876269	0.475
CDKN2A	17-AAG 1026	1026	4	43	SKCM	-0.0161716	0.110939	0.44375
EZH2	17-AAG 1026	1026	3	43	SKCM	0.0355972	0.13693	0.4325
NRAS	17-AAG 1026	1026	9	43	SKCM	0.0285503	0.0998019	0.415
PTEN	17-AAG 1026	1026	4	43	SKCM	-0.0154702	0.110634	0.44125
TP53	17-AAG 1026	1026	14	43	SKCM	-0.0402116	0.100319	0.375
loss:cnaSKCM3	17-AAG 1026	1026	6	43	SKCM	0.00854012	0.0993355	0.4775
loss:cnaSKCM4 (BNC2,CDKN2A,JAK2,PSIP1)	17-AAG 1026	1026	30	43	SKCM	-0.00385756	0.0848275	0.485
loss:cnaSKCM5 (PAX5)	17-AAG 1026	1026	3	43	SKCM	-0.0772288	0.16369	0.3175
loss:cnaSKCM9	17-AAG 1026	1026	3	43	SKCM	-0.0192472	0.115347	0.4475
gain:cnaSKCM12 (KRAS)	17-AAG 1026	1026	7	43	SKCM	-0.0358199	0.101887	0.37
gain:cnaSKCM21 (FOXP1,MITF)	17-AAG 1026	1026	7	43	SKCM	-0.00981117	0.086902	0.4675
loss:cnaSKCM22	17-AAG 1026	1026	6	43	SKCM	-0.113365	0.181702	0.25875
loss:cnaSKCM23	17-AAG 1026	1026	4	43	SKCM	-0.0102972	0.108527	0.46375
loss:cnaSKCM24	17-AAG 1026	1026	7	43	SKCM	0.0068643	0.0920408	0.49875
loss:cnaSKCM25	17-AAG 1026	1026	7	43	SKCM	0.0030833	0.101519	0.4975
loss:cnaSKCM26	17-AAG 1026	1026	3	43	SKCM	-0.0419097	0.13324	0.4075
loss:cnaSKCM27 (CASP1)	17-AAG 1026	1026	6	43	SKCM	-0.0233672	0.0987075	0.42125
loss:cnaSKCM28	17-AAG 1026	1026	5	43	SKCM	0.00213067	0.105289	0.48875
loss:cnaSKCM30	17-AAG 1026	1026	4	43	SKCM	-0.0595143	0.145371	0.37375
APC	17-AAG 1026	1026	3	23	STAD	-0.00891628	0.101327	0.455
ARID1A	17-AAG 1026	1026	4	23	STAD	0.00817411	0.108874	0.46875
ARID2	17-AAG 1026	1026	3	23	STAD	0.0113866	0.102369	0.485
CDH1	17-AAG 1026	1026	3	23	STAD	-0.0245291	0.114329	0.43
EP300	17-AAG 1026	1026	3	23	STAD	-0.01167	0.110896	0.475
PIK3CA	17-AAG 1026	1026	3	23	STAD	-0.0421097	0.121069	0.40125
TP53	17-AAG 1026	1026	17	23	STAD	-0.019545	0.113501	0.45375
loss:cnaSTAD3	17-AAG 1026	1026	5	23	STAD	-0.00561204	0.0984428	0.4625
loss:cnaSTAD7	17-AAG 1026	1026	4	23	STAD	-0.00969435	0.0891878	0.47
loss:cnaSTAD11	17-AAG 1026	1026	3	23	STAD	-0.045224	0.131083	0.4075
loss:cnaSTAD12	17-AAG 1026	1026	3	23	STAD	0.00552351	0.109618	0.4875
loss:cnaSTAD13	17-AAG 1026	1026	13	23	STAD	0.103615	0.16991	0.26625
loss:cnaSTAD16	17-AAG 1026	1026	8	23	STAD	-0.0469011	0.119041	0.355
loss:cnaSTAD17 (CDKN2A)	17-AAG 1026	1026	8	23	STAD	0.0441436	0.109121	0.36875
gain:cnaSTAD26 (MYC)	17-AAG 1026	1026	8	23	STAD	0.00829461	0.101223	0.5
loss:cnaSTAD27 (MAP2K4)	17-AAG 1026	1026	3	23	STAD	-0.0398833	0.126337	0.385
gain:cnaSTAD28 (FOXA2)	17-AAG 1026	1026	3	23	STAD	0.0380271	0.129773	0.4075
gain:cnaSTAD29 (STK4)	17-AAG 1026	1026	3	23	STAD	0.0788569	0.177742	0.335
loss:cnaSTAD30	17-AAG 1026	1026	9	23	STAD	0.00422097	0.0933423	0.4875
loss:cnaSTAD41	17-AAG 1026	1026	15	23	STAD	0.0211899	0.104478	0.41625
loss:cnaSTAD42	17-AAG 1026	1026	3	23	STAD	0.00651036	0.115187	0.47375
loss:cnaSTAD47	17-AAG 1026	1026	8	23	STAD	0.0157098	0.0939959	0.43875
loss:cnaSTAD48 (FAT1,IRF2)	17-AAG 1026	1026	7	23	STAD	0.0293993	0.107668	0.41875
BRAF	17-AAG 1026	1026	6	14	THCA	0.00714082	0.108309	0.465
NRAS	17-AAG 1026	1026	3	14	THCA	0.00382072	0.121687	0.46375
TP53	17-AAG 1026	1026	9	14	THCA	-0.0341569	0.125852	0.44
ARID1A	5-Fluorouracil 179	179	5	19	BLCA	0.0511229	0.171832	0.41375
CDKN1A	5-Fluorouracil 179	179	3	19	BLCA	-0.0336125	0.132061	0.41875
EP300	5-Fluorouracil 179	179	4	19	BLCA	0.0146217	0.134824	0.4875
MLL2	5-Fluorouracil 179	179	3	19	BLCA	0.0189676	0.145536	0.46625
NRAS	5-Fluorouracil 179	179	3	19	BLCA	0.0135779	0.133296	0.46625
RB1	5-Fluorouracil 179	179	6	19	BLCA	0.0179454	0.133416	0.475
TP53	5-Fluorouracil 179	179	15	19	BLCA	-0.0109745	0.119905	0.4775
loss:cnaBLCA5 (FAT1,IRF2)	5-Fluorouracil 179	179	5	19	BLCA	-0.0900422	0.211931	0.33625
gain:cnaBLCA9	5-Fluorouracil 179	179	4	19	BLCA	0.0148741	0.141521	0.475
gain:cnaBLCA15 (ASXL1)	5-Fluorouracil 179	179	6	19	BLCA	0.03811	0.140782	0.425
loss:cnaBLCA18 (CHD9,CNOT1,CYLD,MMP2,NUP93)	5-Fluorouracil 179	179	3	19	BLCA	0.00292631	0.128469	0.4925
gain:cnaBLCA23 (MYC)	5-Fluorouracil 179	179	4	19	BLCA	-0.0129464	0.127849	0.475
ARID1A	5-Fluorouracil 179	179	5	49	BRCA	-0.0279946	0.126952	0.4225
ASH1L	5-Fluorouracil 179	179	3	49	BRCA	-0.0711407	0.189551	0.3575
BRCA1	5-Fluorouracil 179	179	4	49	BRCA	0.0248198	0.139668	0.4425
BRCA2	5-Fluorouracil 179	179	6	49	BRCA	-0.00459616	0.11331	0.47625
CDH1	5-Fluorouracil 179	179	4	49	BRCA	-0.0469545	0.151197	0.37125
MLL3	5-Fluorouracil 179	179	3	49	BRCA	0.00696722	0.129408	0.4675
NF1	5-Fluorouracil 179	179	5	49	BRCA	0.0404956	0.147608	0.38625
PIK3CA	5-Fluorouracil 179	179	17	49	BRCA	0.0100689	0.103218	0.47625
POLR2B	5-Fluorouracil 179	179	3	49	BRCA	0.00125239	0.124356	0.4725
PTEN	5-Fluorouracil 179	179	9	49	BRCA	-0.0338823	0.127989	0.405
TP53	5-Fluorouracil 179	179	38	49	BRCA	0.0288753	0.129745	0.425
gain:cnaBRCA5 (GATA3,KLF6,LARP4B,VIM)	5-Fluorouracil 179	179	6	49	BRCA	-0.0774295	0.16731	0.35625
loss:cnaBRCA7 (FAS,PTEN)	5-Fluorouracil 179	179	4	49	BRCA	0.0157816	0.142684	0.465
gain:cnaBRCA8 (CHD4,WNK1)	5-Fluorouracil 179	179	4	49	BRCA	0.0108014	0.126153	0.48375
gain:cnaBRCA9 (KRAS)	5-Fluorouracil 179	179	4	49	BRCA	-0.0268753	0.125142	0.4225
gain:cnaBRCA10 (MDM2,NUP107)	5-Fluorouracil 179	179	5	49	BRCA	0.0401922	0.15315	0.45625
gain:cnaBRCA12 (TERT)	5-Fluorouracil 179	179	9	49	BRCA	-0.0220005	0.119231	0.43125
gain:cnaBRCA13 (FGFR1,WHSC1L1)	5-Fluorouracil 179	179	11	49	BRCA	-0.00366739	0.122434	0.4875
gain:cnaBRCA14 (RAD21)	5-Fluorouracil 179	179	21	49	BRCA	-0.0369324	0.127192	0.43
gain:cnaBRCA15	5-Fluorouracil 179	179	22	49	BRCA	-0.0260193	0.114208	0.425
gain:cnaBRCA16	5-Fluorouracil 179	179	16	49	BRCA	-0.00880049	0.114658	0.465
loss:cnaBRCA17	5-Fluorouracil 179	179	11	49	BRCA	-0.0644572	0.165692	0.3575
loss:cnaBRCA18	5-Fluorouracil 179	179	16	49	BRCA	-0.0348077	0.131826	0.44125
gain:cnaBRCA19	5-Fluorouracil 179	179	4	49	BRCA	0.0164766	0.13914	0.45875
loss:cnaBRCA20	5-Fluorouracil 179	179	3	49	BRCA	0.0109825	0.134924	0.4625
loss:cnaBRCA22 (SYNCRIP,ZNF292)	5-Fluorouracil 179	179	19	49	BRCA	0.0268968	0.125841	0.41375
loss:cnaBRCA23	5-Fluorouracil 179	179	3	49	BRCA	0.016541	0.132571	0.46875
loss:cnaBRCA24	5-Fluorouracil 179	179	3	49	BRCA	0.00308415	0.121546	0.495
loss:cnaBRCA25 (ARID1B,MAP3K4,MLLT4)	5-Fluorouracil 179	179	6	49	BRCA	-0.0104528	0.119863	0.4675
gain:cnaBRCA26 (CDK12,ERBB2,MED24)	5-Fluorouracil 179	179	15	49	BRCA	0.0635717	0.157536	0.33625
gain:cnaBRCA27 (CLTC,PPM1D)	5-Fluorouracil 179	179	9	49	BRCA	0.0249862	0.131392	0.45375
loss:cnaBRCA28 (GPS2)	5-Fluorouracil 179	179	4	49	BRCA	0.00238947	0.144642	0.4925
loss:cnaBRCA29 (MAP2K4)	5-Fluorouracil 179	179	7	49	BRCA	-0.00134408	0.109979	0.46625
gain:cnaBRCA30 (CRNKL1,FOXA2)	5-Fluorouracil 179	179	5	49	BRCA	0.00241763	0.130352	0.4875
gain:cnaBRCA31	5-Fluorouracil 179	179	16	49	BRCA	0.0257848	0.111376	0.42375
loss:cnaBRCA32 (PABPC3,SACS,ZMYM2)	5-Fluorouracil 179	179	9	49	BRCA	0.0550847	0.155437	0.37875
loss:cnaBRCA33	5-Fluorouracil 179	179	6	49	BRCA	-0.104041	0.216587	0.31875
loss:cnaBRCA34	5-Fluorouracil 179	179	5	49	BRCA	0.0140752	0.12288	0.455
loss:cnaBRCA36 (FAT1,IRF2)	5-Fluorouracil 179	179	9	49	BRCA	0.00510626	0.108011	0.4675
loss:cnaBRCA38	5-Fluorouracil 179	179	4	49	BRCA	-0.0038025	0.127694	0.49375
gain:cnaBRCA39 (FOXA1,NKX2-1,PSMA6)	5-Fluorouracil 179	179	7	49	BRCA	0.00140313	0.121158	0.495
loss:cnaBRCA42	5-Fluorouracil 179	179	3	49	BRCA	-0.0424785	0.151372	0.4275
gain:cnaBRCA47 (EGFR)	5-Fluorouracil 179	179	7	49	BRCA	-0.0340333	0.130186	0.42375
gain:cnaBRCA48	5-Fluorouracil 179	179	5	49	BRCA	-0.020468	0.126075	0.4125
loss:cnaBRCA57	5-Fluorouracil 179	179	5	49	BRCA	0.0548506	0.165588	0.3625
gain:cnaBRCA58 (CCND1)	5-Fluorouracil 179	179	10	49	BRCA	0.0235719	0.131315	0.46625
loss:cnaBRCA60	5-Fluorouracil 179	179	3	49	BRCA	-0.00174528	0.129295	0.49875
gain:cnaBRCA61 (NOTCH2)	5-Fluorouracil 179	179	3	49	BRCA	-0.0159949	0.138823	0.47125
gain:cnaBRCA62	5-Fluorouracil 179	179	10	49	BRCA	-0.0805349	0.170589	0.33
gain:cnaBRCA63	5-Fluorouracil 179	179	7	49	BRCA	-0.0554393	0.156501	0.3625
gain:cnaBRCA64 (SDHC)	5-Fluorouracil 179	179	8	49	BRCA	-0.0550925	0.164918	0.4
AKAP9	5-Fluorouracil 179	179	8	46	COREAD	-0.120386	0.184243	0.25625
APC	5-Fluorouracil 179	179	34	46	COREAD	0.056504	0.127367	0.35375
ARID1A	5-Fluorouracil 179	179	11	46	COREAD	-0.0250039	0.113122	0.43125
ARID1B	5-Fluorouracil 179	179	3	46	COREAD	-0.0195798	0.12167	0.465
ARID2	5-Fluorouracil 179	179	7	46	COREAD	-0.0751582	0.157687	0.32625
ASPM	5-Fluorouracil 179	179	6	46	COREAD	-0.065633	0.148552	0.3475
ASXL2	5-Fluorouracil 179	179	4	46	COREAD	-0.00609132	0.120966	0.47875
ATM	5-Fluorouracil 179	179	4	46	COREAD	-0.00391406	0.116227	0.495
ATRX	5-Fluorouracil 179	179	3	46	COREAD	-0.000106917	0.124559	0.48375
B2M	5-Fluorouracil 179	179	9	46	COREAD	-0.0566774	0.137045	0.3775
BCOR	5-Fluorouracil 179	179	5	46	COREAD	-0.0649582	0.154328	0.3625
BMPR2	5-Fluorouracil 179	179	13	46	COREAD	-0.309571	0.285089	0.11875
BPTF	5-Fluorouracil 179	179	5	46	COREAD	-0.030888	0.120236	0.41125
BRAF	5-Fluorouracil 179	179	10	46	COREAD	-0.0466551	0.126384	0.3775
BRWD1	5-Fluorouracil 179	179	3	46	COREAD	0.0697543	0.188179	0.3675
CDH1	5-Fluorouracil 179	179	3	46	COREAD	-0.00437074	0.115641	0.4925
CDK12	5-Fluorouracil 179	179	3	46	COREAD	-0.0358275	0.129379	0.4225
CEP290	5-Fluorouracil 179	179	6	46	COREAD	0.0321367	0.132505	0.42625
CHD4	5-Fluorouracil 179	179	3	46	COREAD	-0.033153	0.128763	0.39625
CHD9	5-Fluorouracil 179	179	10	46	COREAD	-0.066708	0.146117	0.32625
CLSPN	5-Fluorouracil 179	179	3	46	COREAD	-0.0564739	0.15085	0.34625
CNOT1	5-Fluorouracil 179	179	3	46	COREAD	-0.0269234	0.130358	0.45
CREBBP	5-Fluorouracil 179	179	5	46	COREAD	-0.0390157	0.128632	0.41125
CTCF	5-Fluorouracil 179	179	8	46	COREAD	0.00975366	0.107701	0.4875
CTNNB1	5-Fluorouracil 179	179	6	46	COREAD	-0.0356686	0.12212	0.38625
DNMT3A	5-Fluorouracil 179	179	3	46	COREAD	-0.000551437	0.116159	0.4925
EGFR	5-Fluorouracil 179	179	4	46	COREAD	-0.0537789	0.157008	0.37375
ELF3	5-Fluorouracil 179	179	4	46	COREAD	0.0236099	0.126592	0.43875
EP300	5-Fluorouracil 179	179	15	46	COREAD	-0.103425	0.160351	0.2425
FAM123B	5-Fluorouracil 179	179	3	46	COREAD	0.00548876	0.113205	0.465
FBXW7	5-Fluorouracil 179	179	15	46	COREAD	-0.0170277	0.10023	0.42375
GNAS	5-Fluorouracil 179	179	3	46	COREAD	-0.00902807	0.103903	0.4575
ITSN1	5-Fluorouracil 179	179	3	46	COREAD	-0.0735186	0.171627	0.34875
KDM6A	5-Fluorouracil 179	179	3	46	COREAD	-0.00417674	0.116419	0.48625
KRAS	5-Fluorouracil 179	179	26	46	COREAD	-0.0301099	0.108909	0.42625
LARP4B	5-Fluorouracil 179	179	5	46	COREAD	-0.0535011	0.132101	0.35375
LPHN2	5-Fluorouracil 179	179	4	46	COREAD	-0.0456925	0.133659	0.37375
MAP2K4	5-Fluorouracil 179	179	5	46	COREAD	-0.055241	0.147617	0.38
MAP3K4	5-Fluorouracil 179	179	3	46	COREAD	-0.0196636	0.118007	0.4575
MECOM	5-Fluorouracil 179	179	5	46	COREAD	-0.0409266	0.127658	0.3975
MGA	5-Fluorouracil 179	179	6	46	COREAD	0.0260226	0.117401	0.4275
MLL2	5-Fluorouracil 179	179	15	46	COREAD	-0.159617	0.210079	0.20375
NCOR1	5-Fluorouracil 179	179	7	46	COREAD	-0.00785378	0.1043	0.46375
NF1	5-Fluorouracil 179	179	7	46	COREAD	-0.0669225	0.138248	0.32875
NR4A2	5-Fluorouracil 179	179	5	46	COREAD	0.00631363	0.116879	0.5
NUP98	5-Fluorouracil 179	179	4	46	COREAD	-0.024171	0.114017	0.415
PBRM1	5-Fluorouracil 179	179	5	46	COREAD	-0.0117742	0.109776	0.47875
PIK3CA	5-Fluorouracil 179	179	12	46	COREAD	-0.0223387	0.105034	0.41375
PIK3R1	5-Fluorouracil 179	179	6	46	COREAD	-0.0366171	0.124563	0.40125
POLR2B	5-Fluorouracil 179	179	3	46	COREAD	-0.0300116	0.127706	0.41
PTEN	5-Fluorouracil 179	179	6	46	COREAD	-0.0769871	0.162705	0.33375
RNF43	5-Fluorouracil 179	179	10	46	COREAD	-0.0973171	0.165324	0.27625
SACS	5-Fluorouracil 179	179	10	46	COREAD	-0.0347092	0.116765	0.4325
SMAD2	5-Fluorouracil 179	179	3	46	COREAD	-0.0346876	0.145772	0.4225
SMAD4	5-Fluorouracil 179	179	9	46	COREAD	0.0439716	0.13308	0.4025
SMARCA4	5-Fluorouracil 179	179	5	46	COREAD	-0.0857746	0.155399	0.29625
SOS2	5-Fluorouracil 179	179	5	46	COREAD	-0.077479	0.158072	0.2975
SOX9	5-Fluorouracil 179	179	4	46	COREAD	-0.0258944	0.118546	0.44
SRGAP3	5-Fluorouracil 179	179	3	46	COREAD	-0.000150215	0.116597	0.47625
TCF7L2	5-Fluorouracil 179	179	3	46	COREAD	-0.00533882	0.126079	0.4825
TP53	5-Fluorouracil 179	179	33	46	COREAD	0.0577051	0.134192	0.365
TRIO	5-Fluorouracil 179	179	7	46	COREAD	-0.0438095	0.130775	0.375
loss:cnaCOREAD11	5-Fluorouracil 179	179	19	46	COREAD	0.0300591	0.10656	0.39875
loss:cnaCOREAD12 (PCDH18)	5-Fluorouracil 179	179	3	46	COREAD	0.048788	0.159676	0.39625
loss:cnaCOREAD14	5-Fluorouracil 179	179	3	46	COREAD	0.0187879	0.113075	0.4575
loss:cnaCOREAD18	5-Fluorouracil 179	179	9	46	COREAD	-0.0107886	0.106741	0.4675
loss:cnaCOREAD19	5-Fluorouracil 179	179	18	46	COREAD	-0.117487	0.177622	0.23
loss:cnaCOREAD23	5-Fluorouracil 179	179	3	46	COREAD	0.0631094	0.166531	0.36375
loss:cnaCOREAD24	5-Fluorouracil 179	179	10	46	COREAD	0.0279098	0.121021	0.41625
loss:cnaCOREAD27 (MAP2K4)	5-Fluorouracil 179	179	4	46	COREAD	0.0276871	0.137107	0.43125
loss:cnaCOREAD28 (SOX9)	5-Fluorouracil 179	179	3	46	COREAD	0.0847051	0.234565	0.3875
gain:cnaCOREAD31	5-Fluorouracil 179	179	4	46	COREAD	0.174969	0.321171	0.26875
gain:cnaCOREAD32 (STK4)	5-Fluorouracil 179	179	5	46	COREAD	0.129615	0.240348	0.26875
loss:cnaCOREAD33	5-Fluorouracil 179	179	20	46	COREAD	-0.0335529	0.108604	0.40375
gain:cnaCOREAD35 (FLT3,WASF3)	5-Fluorouracil 179	179	6	46	COREAD	-0.00584151	0.117415	0.49
gain:cnaCOREAD36	5-Fluorouracil 179	179	3	46	COREAD	-0.010901	0.106338	0.45625
gain:cnaCOREAD37 (ING1,IRS2,TFDP1)	5-Fluorouracil 179	179	5	46	COREAD	-0.0140507	0.122055	0.46375
loss:cnaCOREAD38 (CDKN2A)	5-Fluorouracil 179	179	7	46	COREAD	0.0984309	0.187153	0.305
loss:cnaCOREAD42 (B2M,BUB1B,MGA,TP53BP1)	5-Fluorouracil 179	179	3	46	COREAD	0.0298521	0.135478	0.4275
gain:cnaCOREAD47 (MYC)	5-Fluorouracil 179	179	6	46	COREAD	0.00186783	0.107963	0.49375
loss:cnaCOREAD48	5-Fluorouracil 179	179	6	46	COREAD	0.0635025	0.159955	0.37125
loss:cnaCOREAD49	5-Fluorouracil 179	179	15	46	COREAD	-0.129997	0.197531	0.23625
loss:cnaCOREAD53 (ARFGAP3)	5-Fluorouracil 179	179	3	46	COREAD	0.0660525	0.177542	0.375
loss:cnaCOREAD54 (SMAD4)	5-Fluorouracil 179	179	12	46	COREAD	0.0325255	0.112848	0.40375
loss:cnaCOREAD55	5-Fluorouracil 179	179	12	46	COREAD	0.0424562	0.131193	0.40875
loss:cnaCOREAD56	5-Fluorouracil 179	179	12	46	COREAD	0.0408806	0.11766	0.3775
loss:cnaCOREAD63 (APC)	5-Fluorouracil 179	179	6	46	COREAD	0.0412004	0.133959	0.37375
loss:cnaCOREAD65	5-Fluorouracil 179	179	27	46	COREAD	-0.470449	0.331258	0.06
ARID1A	5-Fluorouracil 179	179	3	29	DLBC	-0.0310209	0.133476	0.43125
CREBBP	5-Fluorouracil 179	179	6	29	DLBC	0.0375457	0.129513	0.4325
EP300	5-Fluorouracil 179	179	6	29	DLBC	0.0478027	0.137871	0.37125
MLL2	5-Fluorouracil 179	179	9	29	DLBC	0.0387532	0.121886	0.38
PTEN	5-Fluorouracil 179	179	6	29	DLBC	0.0118192	0.100926	0.44625
TP53	5-Fluorouracil 179	179	17	29	DLBC	0.0704775	0.143674	0.31125
loss:cnaDLBC2	5-Fluorouracil 179	179	4	29	DLBC	-0.085721	0.17522	0.32125
loss:cnaDLBC4 (CDKN2A)	5-Fluorouracil 179	179	7	29	DLBC	-0.0368733	0.121415	0.4075
EGFR	5-Fluorouracil 179	179	3	35	ESCA	-0.0326344	0.131175	0.42875
EP300	5-Fluorouracil 179	179	3	35	ESCA	0.0279522	0.140006	0.4225
MLL2	5-Fluorouracil 179	179	3	35	ESCA	-0.00733148	0.124168	0.45375
NFE2L2	5-Fluorouracil 179	179	3	35	ESCA	0.0337389	0.134645	0.42375
NOTCH1	5-Fluorouracil 179	179	4	35	ESCA	-0.0140241	0.134351	0.46875
PIK3CA	5-Fluorouracil 179	179	5	35	ESCA	-0.0137587	0.12634	0.4575
SMAD4	5-Fluorouracil 179	179	4	35	ESCA	-0.081556	0.188596	0.31875
loss:cnaESCA1	5-Fluorouracil 179	179	6	35	ESCA	-0.132973	0.244834	0.27625
gain:cnaESCA2 (KRAS)	5-Fluorouracil 179	179	3	35	ESCA	0.0313379	0.153283	0.435
gain:cnaESCA3 (KRAS)	5-Fluorouracil 179	179	3	35	ESCA	0.0329676	0.136652	0.39625
loss:cnaESCA5 (PAX5)	5-Fluorouracil 179	179	3	35	ESCA	-0.0225803	0.142241	0.445
gain:cnaESCA7 (ERBB2)	5-Fluorouracil 179	179	10	35	ESCA	0.0113752	0.116308	0.46125
gain:cnaESCA9 (EGFR)	5-Fluorouracil 179	179	8	35	ESCA	0.00161696	0.119717	0.4925
gain:cnaESCA11 (CCND1,CTTN)	5-Fluorouracil 179	179	16	35	ESCA	0.0113993	0.125918	0.48375
loss:cnaESCA12	5-Fluorouracil 179	179	8	35	ESCA	-0.0995653	0.186479	0.30375
loss:cnaESCA14	5-Fluorouracil 179	179	10	35	ESCA	-0.00517713	0.104351	0.4675
NF1	5-Fluorouracil 179	179	8	35	GBM	-0.0400898	0.153342	0.44125
PTEN	5-Fluorouracil 179	179	18	35	GBM	0.0141869	0.115969	0.46375
RB1	5-Fluorouracil 179	179	5	35	GBM	0.0119054	0.12406	0.4875
TP53	5-Fluorouracil 179	179	21	35	GBM	0.0390455	0.138626	0.42125
loss:cnaGBM1	5-Fluorouracil 179	179	3	35	GBM	0.00499409	0.130953	0.48875
loss:cnaGBM2 (CDKN2A)	5-Fluorouracil 179	179	26	35	GBM	-0.0242996	0.123045	0.45875
loss:cnaGBM19 (FAT1,IRF2)	5-Fluorouracil 179	179	6	35	GBM	0.0151007	0.125644	0.48
gain:cnaGBM25 (CDK4)	5-Fluorouracil 179	179	4	35	GBM	-0.0427217	0.138952	0.39
loss:cnaGBM45	5-Fluorouracil 179	179	3	35	GBM	0.0082093	0.141723	0.48375
loss:cnaGBM47	5-Fluorouracil 179	179	6	35	GBM	-0.00780965	0.122921	0.5
loss:cnaGBM68 (CDKN2C,FAF1)	5-Fluorouracil 179	179	6	35	GBM	-0.00245642	0.135294	0.4825
gain:cnaGBM71 (SOX2)	5-Fluorouracil 179	179	3	35	GBM	0.0147461	0.132768	0.46625
loss:cnaGBM93	5-Fluorouracil 179	179	6	35	GBM	0.0209824	0.141284	0.45375
loss:cnaGBM94	5-Fluorouracil 179	179	6	35	GBM	0.0190578	0.123143	0.44875
loss:cnaGBM95	5-Fluorouracil 179	179	6	35	GBM	0.0140169	0.115076	0.46875
loss:cnaGBM97	5-Fluorouracil 179	179	3	35	GBM	0.0318011	0.149626	0.42875
loss:cnaGBM98	5-Fluorouracil 179	179	3	35	GBM	0.0207969	0.15859	0.47625
loss:cnaGBM99 (ANK3)	5-Fluorouracil 179	179	3	35	GBM	0.0199419	0.142135	0.45875
loss:cnaGBM100	5-Fluorouracil 179	179	3	35	GBM	0.0366409	0.139605	0.40125
loss:cnaGBM101	5-Fluorouracil 179	179	5	35	GBM	0.0538074	0.162333	0.37625
loss:cnaGBM102	5-Fluorouracil 179	179	3	35	GBM	0.027258	0.138127	0.46625
loss:cnaGBM103	5-Fluorouracil 179	179	3	35	GBM	0.0211878	0.130623	0.43625
loss:cnaGBM104	5-Fluorouracil 179	179	3	35	GBM	0.021691	0.137379	0.4425
loss:cnaGBM105	5-Fluorouracil 179	179	3	35	GBM	0.0284229	0.130099	0.41125
loss:cnaGBM106	5-Fluorouracil 179	179	3	35	GBM	0.0232398	0.141678	0.45625
gain:cnaGBM122	5-Fluorouracil 179	179	9	35	GBM	0.027762	0.122475	0.435
gain:cnaGBM123 (EGFR)	5-Fluorouracil 179	179	10	35	GBM	0.0722612	0.180272	0.35125
gain:cnaGBM124	5-Fluorouracil 179	179	4	35	GBM	0.0479114	0.167773	0.41375
gain:cnaGBM125 (AKAP9)	5-Fluorouracil 179	179	9	35	GBM	0.0384141	0.14431	0.40375
loss:cnaGBM132	5-Fluorouracil 179	179	3	35	GBM	0.0137099	0.126087	0.465
loss:cnaGBM133	5-Fluorouracil 179	179	3	35	GBM	0.0114492	0.132561	0.47875
loss:cnaGBM134	5-Fluorouracil 179	179	3	35	GBM	-0.00201578	0.114256	0.4925
loss:cnaGBM135	5-Fluorouracil 179	179	3	35	GBM	-0.0143889	0.128863	0.48
CASP8	5-Fluorouracil 179	179	6	39	HNSC	-0.0112872	0.112267	0.46125
CDKN2A	5-Fluorouracil 179	179	9	39	HNSC	-0.0344082	0.131483	0.4
FAT1	5-Fluorouracil 179	179	7	39	HNSC	0.020864	0.127861	0.46625
HLA-A	5-Fluorouracil 179	179	3	39	HNSC	-0.0152933	0.126349	0.465
NFE2L2	5-Fluorouracil 179	179	3	39	HNSC	0.0121393	0.128977	0.4625
NOTCH1	5-Fluorouracil 179	179	3	39	HNSC	0.0195014	0.125388	0.45
NSD1	5-Fluorouracil 179	179	4	39	HNSC	0.0110492	0.121326	0.4775
PIK3CA	5-Fluorouracil 179	179	7	39	HNSC	0.00693057	0.120433	0.47875
SMAD4	5-Fluorouracil 179	179	6	39	HNSC	-0.161622	0.279409	0.285
TP53	5-Fluorouracil 179	179	35	39	HNSC	-0.0191001	0.136719	0.4625
gain:cnaHNSC1 (ACTB,CARD11,PMS2,RAC1)	5-Fluorouracil 179	179	8	39	HNSC	-0.0215255	0.123902	0.44125
gain:cnaHNSC2 (EGFR)	5-Fluorouracil 179	179	11	39	HNSC	0.0056473	0.116551	0.48625
loss:cnaHNSC6	5-Fluorouracil 179	179	18	39	HNSC	-0.00190812	0.110806	0.49375
gain:cnaHNSC8	5-Fluorouracil 179	179	4	39	HNSC	0.00220464	0.122379	0.495
loss:cnaHNSC11 (CDKN2A)	5-Fluorouracil 179	179	13	39	HNSC	0.0138456	0.116098	0.43375
gain:cnaHNSC14 (ASXL1)	5-Fluorouracil 179	179	6	39	HNSC	0.0151429	0.119209	0.4675
gain:cnaHNSC17 (CCND1,CTTN)	5-Fluorouracil 179	179	16	39	HNSC	0.00821887	0.107596	0.45625
loss:cnaHNSC19 (MED17)	5-Fluorouracil 179	179	5	39	HNSC	0.0273868	0.134188	0.4425
loss:cnaHNSC20	5-Fluorouracil 179	179	18	39	HNSC	0.00851858	0.108732	0.4775
gain:cnaHNSC21 (MCM3)	5-Fluorouracil 179	179	3	39	HNSC	0.0205535	0.14817	0.45625
loss:cnaHNSC26	5-Fluorouracil 179	179	15	39	HNSC	0.00262469	0.123307	0.4975
loss:cnaHNSC28 (ATP1A1,CSDE1,NRAS)	5-Fluorouracil 179	179	4	39	HNSC	0.0219082	0.123214	0.42
loss:cnaHNSC29	5-Fluorouracil 179	179	5	39	HNSC	0.0407871	0.147268	0.42
loss:cnaHNSC32 (FAT1)	5-Fluorouracil 179	179	13	39	HNSC	-0.0484386	0.147815	0.38375
BAP1	5-Fluorouracil 179	179	3	30	KIRC	0.0161055	0.142538	0.48625
NF2	5-Fluorouracil 179	179	6	30	KIRC	0.0193752	0.131154	0.42625
PBRM1	5-Fluorouracil 179	179	5	30	KIRC	0.012076	0.132007	0.45875
PTEN	5-Fluorouracil 179	179	3	30	KIRC	-0.0213674	0.136891	0.44375
SETD2	5-Fluorouracil 179	179	5	30	KIRC	0.00854307	0.139973	0.46
TP53	5-Fluorouracil 179	179	11	30	KIRC	0.0169056	0.121512	0.44625
VHL	5-Fluorouracil 179	179	11	30	KIRC	-0.0109892	0.119244	0.45625
loss:cnaKIRC5	5-Fluorouracil 179	179	3	30	KIRC	0.0109442	0.126132	0.49875
loss:cnaKIRC7 (CDKN2A)	5-Fluorouracil 179	179	25	30	KIRC	-0.038823	0.170618	0.44
loss:cnaKIRC12	5-Fluorouracil 179	179	11	30	KIRC	-0.0325115	0.138849	0.44125
loss:cnaKIRC13	5-Fluorouracil 179	179	11	30	KIRC	-0.0408303	0.134908	0.40375
loss:cnaKIRC14	5-Fluorouracil 179	179	11	30	KIRC	-0.0326514	0.136476	0.4475
loss:cnaKIRC15	5-Fluorouracil 179	179	11	30	KIRC	-0.0417201	0.141139	0.3825
loss:cnaKIRC16	5-Fluorouracil 179	179	6	30	KIRC	0.00857903	0.133277	0.47625
loss:cnaKIRC19	5-Fluorouracil 179	179	7	30	KIRC	-0.0155429	0.118329	0.46
loss:cnaKIRC22	5-Fluorouracil 179	179	9	30	KIRC	-0.0289528	0.130302	0.455
loss:cnaKIRC23	5-Fluorouracil 179	179	4	30	KIRC	-0.000130451	0.138497	0.48
loss:cnaKIRC24 (FAT1,IRF2)	5-Fluorouracil 179	179	7	30	KIRC	0.0134477	0.145331	0.45375
loss:cnaKIRC27	5-Fluorouracil 179	179	3	30	KIRC	0.0171236	0.127094	0.47875
ASXL1	5-Fluorouracil 179	179	4	25	LAML	-0.00848857	0.105899	0.47125
CREBBP	5-Fluorouracil 179	179	3	25	LAML	0.0418594	0.135744	0.39625
KRAS	5-Fluorouracil 179	179	3	25	LAML	0.00540777	0.108948	0.48125
NRAS	5-Fluorouracil 179	179	7	25	LAML	0.0957947	0.166166	0.27875
SACS	5-Fluorouracil 179	179	3	25	LAML	0.099036	0.200144	0.3125
TP53	5-Fluorouracil 179	179	12	25	LAML	0.165224	0.208454	0.19875
NF1	5-Fluorouracil 179	179	3	17	LGG	0.0120719	0.134509	0.47
RB1	5-Fluorouracil 179	179	7	17	LGG	-0.00948959	0.116537	0.45375
TP53	5-Fluorouracil 179	179	12	17	LGG	0.00289318	0.124293	0.5
loss:cnaLGG1 (BNC2,CDKN2A,JAK2,PSIP1)	5-Fluorouracil 179	179	9	17	LGG	0.0275722	0.138577	0.41
loss:cnaLGG7 (RPL22)	5-Fluorouracil 179	179	3	17	LGG	0.0182688	0.13661	0.47125
loss:cnaLGG14 (CUL2)	5-Fluorouracil 179	179	4	17	LGG	0.0184207	0.131033	0.485
gain:cnaLGG16 (EGFR)	5-Fluorouracil 179	179	5	17	LGG	-0.0646847	0.192903	0.37625
TP53	5-Fluorouracil 179	179	12	16	LIHC	0.0039204	0.110681	0.4975
loss:cnaLIHC7 (CDKN2A)	5-Fluorouracil 179	179	4	16	LIHC	0.0376864	0.149632	0.425
loss:cnaLIHC10 (RB1)	5-Fluorouracil 179	179	2	16	LIHC	0.0145379	0.116807	0.45875
ARID1A	5-Fluorouracil 179	179	4	60	LUAD	0.00970797	0.129121	0.46875
BRAF	5-Fluorouracil 179	179	3	60	LUAD	0.0253983	0.132475	0.45
EGFR	5-Fluorouracil 179	179	4	60	LUAD	-0.00730782	0.125204	0.47125
KDR	5-Fluorouracil 179	179	3	60	LUAD	0.000914376	0.133975	0.48875
KRAS	5-Fluorouracil 179	179	20	60	LUAD	-0.0445642	0.11807	0.35
MGA	5-Fluorouracil 179	179	3	60	LUAD	0.0219434	0.127852	0.435
NF1	5-Fluorouracil 179	179	3	60	LUAD	0.00418088	0.131207	0.49875
RB1	5-Fluorouracil 179	179	3	60	LUAD	0.00737622	0.148901	0.495
RBM10	5-Fluorouracil 179	179	3	60	LUAD	-0.00795677	0.123023	0.49125
SMARCA4	5-Fluorouracil 179	179	12	60	LUAD	0.0218521	0.114637	0.4425
STK11	5-Fluorouracil 179	179	11	60	LUAD	0.0394012	0.127056	0.37375
SVEP1	5-Fluorouracil 179	179	3	60	LUAD	0.023728	0.137552	0.47375
TP53	5-Fluorouracil 179	179	49	60	LUAD	0.00373938	0.111287	0.49875
U2AF1	5-Fluorouracil 179	179	3	60	LUAD	-0.0117768	0.125984	0.46625
loss:cnaLUAD1 (CDKN2A)	5-Fluorouracil 179	179	35	60	LUAD	0.0151533	0.0986682	0.455
loss:cnaLUAD2 (PAX5)	5-Fluorouracil 179	179	5	60	LUAD	0.010066	0.122407	0.46
gain:cnaLUAD3 (TERT)	5-Fluorouracil 179	179	12	60	LUAD	-0.0321855	0.11788	0.41625
gain:cnaLUAD5 (CUL2,EPC1)	5-Fluorouracil 179	179	4	60	LUAD	0.0286241	0.1414	0.4125
loss:cnaLUAD6 (SMARCA4)	5-Fluorouracil 179	179	5	60	LUAD	-0.0128821	0.120189	0.48625
loss:cnaLUAD7	5-Fluorouracil 179	179	4	60	LUAD	-0.00795821	0.122865	0.4625
gain:cnaLUAD10 (AHR,HDAC9)	5-Fluorouracil 179	179	8	60	LUAD	0.0133084	0.11334	0.46125
gain:cnaLUAD11 (EGFR)	5-Fluorouracil 179	179	10	60	LUAD	0.0376805	0.131346	0.4075
gain:cnaLUAD12	5-Fluorouracil 179	179	5	60	LUAD	0.0305075	0.144514	0.4475
gain:cnaLUAD13 (MET)	5-Fluorouracil 179	179	6	60	LUAD	0.0249213	0.131062	0.41875
loss:cnaLUAD14	5-Fluorouracil 179	179	7	60	LUAD	-0.000869851	0.129232	0.48
loss:cnaLUAD15	5-Fluorouracil 179	179	7	60	LUAD	-0.00985327	0.10836	0.47
loss:cnaLUAD16	5-Fluorouracil 179	179	6	60	LUAD	-0.0114026	0.118971	0.43625
gain:cnaLUAD17 (KRAS)	5-Fluorouracil 179	179	6	60	LUAD	-0.0357326	0.137841	0.41875
gain:cnaLUAD18	5-Fluorouracil 179	179	7	60	LUAD	0.0330704	0.133492	0.405
gain:cnaLUAD19 (CDK4)	5-Fluorouracil 179	179	6	60	LUAD	0.0428719	0.14084	0.3975
gain:cnaLUAD21 (FOXA2)	5-Fluorouracil 179	179	8	60	LUAD	0.0409903	0.136455	0.40625
gain:cnaLUAD22 (ASXL1)	5-Fluorouracil 179	179	8	60	LUAD	0.0444033	0.148971	0.43125
gain:cnaLUAD23 (ARFGAP1)	5-Fluorouracil 179	179	5	60	LUAD	-0.0575401	0.157661	0.37375
loss:cnaLUAD25	5-Fluorouracil 179	179	4	60	LUAD	0.0178494	0.138226	0.48
gain:cnaLUAD27 (MYC)	5-Fluorouracil 179	179	17	60	LUAD	-0.00218253	0.113061	0.5
loss:cnaLUAD28	5-Fluorouracil 179	179	10	60	LUAD	0.0474051	0.149457	0.38375
loss:cnaLUAD29 (TFDP1)	5-Fluorouracil 179	179	9	60	LUAD	0.0303953	0.129397	0.4175
gain:cnaLUAD30 (CCND1)	5-Fluorouracil 179	179	7	60	LUAD	-0.0527886	0.151714	0.38375
loss:cnaLUAD31	5-Fluorouracil 179	179	3	60	LUAD	0.00324642	0.134501	0.47
gain:cnaLUAD32	5-Fluorouracil 179	179	3	60	LUAD	0.0224778	0.13573	0.44
loss:cnaLUAD34 (FAT1,IRF2)	5-Fluorouracil 179	179	19	60	LUAD	-0.0276544	0.109132	0.415
gain:cnaLUAD35 (MECOM)	5-Fluorouracil 179	179	5	60	LUAD	0.0403315	0.139224	0.3875
MLL2	5-Fluorouracil 179	179	3	14	LUSC	-0.0404764	0.147838	0.4225
loss:cnaLUSC3	5-Fluorouracil 179	179	6	14	LUSC	0.0105751	0.114137	0.45375
loss:cnaLUSC4	5-Fluorouracil 179	179	6	14	LUSC	0.00586714	0.107682	0.4925
gain:cnaLUSC6 (FGFR1,WHSC1L1)	5-Fluorouracil 179	179	3	14	LUSC	-0.0110664	0.1334	0.485
gain:cnaLUSC7 (MYC)	5-Fluorouracil 179	179	3	14	LUSC	-0.00725946	0.131414	0.4775
loss:cnaLUSC10 (CDKN2A)	5-Fluorouracil 179	179	10	14	LUSC	0.194237	0.354458	0.28125
gain:cnaLUSC14 (CCT5,TERT,TRIO)	5-Fluorouracil 179	179	5	14	LUSC	-0.0186526	0.124174	0.44125
loss:cnaLUSC17 (FAT1,IRF2)	5-Fluorouracil 179	179	6	14	LUSC	0.0171121	0.130171	0.4375
gain:cnaLUSC25	5-Fluorouracil 179	179	4	14	LUSC	0.0151477	0.14411	0.49875
gain:cnaLUSC26 (SOX2)	5-Fluorouracil 179	179	3	14	LUSC	0.000669936	0.127078	0.49875
gain:cnaLUSC30	5-Fluorouracil 179	179	3	14	LUSC	-0.00936151	0.132582	0.4875
gain:cnaLUSC32 (BCL11A,REL,XPO1)	5-Fluorouracil 179	179	3	14	LUSC	-0.0076882	0.128341	0.4875
gain:cnaLUSC37	5-Fluorouracil 179	179	3	14	LUSC	-0.0142164	0.129633	0.4725
gain:cnaLUSC41 (AKAP9)	5-Fluorouracil 179	179	4	14	LUSC	-0.00369105	0.126039	0.48625
loss:cnaLUSC51	5-Fluorouracil 179	179	6	14	LUSC	0.000863526	0.119498	0.49375
loss:cnaLUSC54	5-Fluorouracil 179	179	6	14	LUSC	-0.0201903	0.125387	0.44125
ARID1A	5-Fluorouracil 179	179	8	31	OV	-0.0258636	0.124691	0.42625
KRAS	5-Fluorouracil 179	179	7	31	OV	-0.0301575	0.129744	0.42125
NF1	5-Fluorouracil 179	179	4	31	OV	0.0212417	0.136557	0.43875
PIK3CA	5-Fluorouracil 179	179	6	31	OV	-0.0266845	0.142232	0.41375
PIK3R1	5-Fluorouracil 179	179	5	31	OV	0.00565883	0.119	0.5
PTEN	5-Fluorouracil 179	179	3	31	OV	-0.0153151	0.123555	0.47
SMAD4	5-Fluorouracil 179	179	3	31	OV	0.0222021	0.129743	0.4625
SMARCA4	5-Fluorouracil 179	179	3	31	OV	-0.0154323	0.11894	0.4375
TP53	5-Fluorouracil 179	179	21	31	OV	0.00189531	0.112048	0.47875
loss:cnaOV1	5-Fluorouracil 179	179	3	31	OV	0.0268655	0.140671	0.43
gain:cnaOV4 (KRAS)	5-Fluorouracil 179	179	7	31	OV	-0.00290196	0.11078	0.49375
loss:cnaOV16	5-Fluorouracil 179	179	6	31	OV	0.0418471	0.15187	0.41875
loss:cnaOV17	5-Fluorouracil 179	179	6	31	OV	0.0531283	0.166495	0.4075
gain:cnaOV18 (CCNE1)	5-Fluorouracil 179	179	3	31	OV	0.0344106	0.147775	0.43625
loss:cnaOV20	5-Fluorouracil 179	179	5	31	OV	0.049913	0.165136	0.38
loss:cnaOV21	5-Fluorouracil 179	179	3	31	OV	0.0234287	0.147909	0.44125
loss:cnaOV22	5-Fluorouracil 179	179	3	31	OV	0.026622	0.1294	0.4225
loss:cnaOV27	5-Fluorouracil 179	179	5	31	OV	0.0562338	0.164317	0.38125
loss:cnaOV28	5-Fluorouracil 179	179	5	31	OV	0.0595483	0.171359	0.3875
loss:cnaOV29	5-Fluorouracil 179	179	5	31	OV	0.0493027	0.165368	0.4025
loss:cnaOV30	5-Fluorouracil 179	179	5	31	OV	0.0666033	0.193402	0.3975
loss:cnaOV33 (ZFHX3)	5-Fluorouracil 179	179	4	31	OV	0.0447076	0.159868	0.42
loss:cnaOV34	5-Fluorouracil 179	179	5	31	OV	0.000118621	0.11395	0.4975
loss:cnaOV35	5-Fluorouracil 179	179	5	31	OV	0.00509268	0.114582	0.48375
loss:cnaOV36	5-Fluorouracil 179	179	3	31	OV	0.0293448	0.153555	0.4375
loss:cnaOV38	5-Fluorouracil 179	179	8	31	OV	0.00597972	0.113198	0.49125
loss:cnaOV39	5-Fluorouracil 179	179	9	31	OV	0.0153435	0.108019	0.44125
loss:cnaOV40	5-Fluorouracil 179	179	7	31	OV	0.00524406	0.116845	0.4775
loss:cnaOV41	5-Fluorouracil 179	179	5	31	OV	0.0577629	0.175553	0.395
loss:cnaOV42	5-Fluorouracil 179	179	4	31	OV	0.0467012	0.162022	0.39875
loss:cnaOV43 (NF1)	5-Fluorouracil 179	179	5	31	OV	0.0528535	0.148802	0.4
loss:cnaOV44	5-Fluorouracil 179	179	3	31	OV	0.0398621	0.163323	0.40875
gain:cnaOV48 (SOX17)	5-Fluorouracil 179	179	3	31	OV	-0.0367082	0.155308	0.43375
gain:cnaOV49	5-Fluorouracil 179	179	3	31	OV	-0.0211976	0.137906	0.42875
gain:cnaOV50	5-Fluorouracil 179	179	4	31	OV	-0.00582766	0.134499	0.485
gain:cnaOV51 (MYC)	5-Fluorouracil 179	179	7	31	OV	-0.0109449	0.125871	0.48
loss:cnaOV52	5-Fluorouracil 179	179	8	31	OV	0.0355262	0.134483	0.405
loss:cnaOV53	5-Fluorouracil 179	179	8	31	OV	0.0283909	0.132289	0.4125
loss:cnaOV54	5-Fluorouracil 179	179	10	31	OV	0.0292283	0.136673	0.43125
loss:cnaOV55	5-Fluorouracil 179	179	7	31	OV	0.0249634	0.135383	0.42375
loss:cnaOV56	5-Fluorouracil 179	179	3	31	OV	0.0296666	0.154218	0.45125
loss:cnaOV57 (ZNRF3)	5-Fluorouracil 179	179	4	31	OV	0.0223318	0.132979	0.45875
loss:cnaOV58	5-Fluorouracil 179	179	5	31	OV	0.0310636	0.135086	0.40875
loss:cnaOV59	5-Fluorouracil 179	179	4	31	OV	0.031895	0.149375	0.4075
loss:cnaOV61	5-Fluorouracil 179	179	3	31	OV	0.0196153	0.158514	0.43625
loss:cnaOV62	5-Fluorouracil 179	179	3	31	OV	0.01456	0.127189	0.4525
loss:cnaOV63	5-Fluorouracil 179	179	3	31	OV	0.0247495	0.129718	0.43
loss:cnaOV64 (ARID1B,MAP3K4,MLLT4)	5-Fluorouracil 179	179	7	31	OV	0.0146911	0.119036	0.46
loss:cnaOV70	5-Fluorouracil 179	179	3	31	OV	0.0223107	0.14494	0.46875
gain:cnaOV72 (ASXL1)	5-Fluorouracil 179	179	4	31	OV	0.0173131	0.133238	0.465
loss:cnaOV81 (RB1)	5-Fluorouracil 179	179	4	31	OV	0.0295705	0.139971	0.4225
loss:cnaOV82	5-Fluorouracil 179	179	3	31	OV	0.0267007	0.149615	0.45125
loss:cnaOV83	5-Fluorouracil 179	179	5	31	OV	0.0494507	0.173432	0.40625
loss:cnaOV84	5-Fluorouracil 179	179	6	31	OV	0.00712813	0.132225	0.49
loss:cnaOV85	5-Fluorouracil 179	179	7	31	OV	0.0134759	0.113928	0.44
loss:cnaOV87	5-Fluorouracil 179	179	3	31	OV	0.0433184	0.170506	0.4325
loss:cnaOV88	5-Fluorouracil 179	179	3	31	OV	0.034334	0.150001	0.4275
gain:cnaOV94	5-Fluorouracil 179	179	6	31	OV	0.00587386	0.121831	0.48875
gain:cnaOV95 (MECOM)	5-Fluorouracil 179	179	8	31	OV	0.00387077	0.117357	0.495
gain:cnaOV96	5-Fluorouracil 179	179	4	31	OV	0.013839	0.115578	0.455
loss:cnaOV102	5-Fluorouracil 179	179	3	31	OV	0.0164366	0.13338	0.44625
ARID1A	5-Fluorouracil 179	179	3	29	PAAD	-0.010448	0.125837	0.48375
CDKN2A	5-Fluorouracil 179	179	4	29	PAAD	-0.028437	0.132926	0.4375
EP300	5-Fluorouracil 179	179	3	29	PAAD	-0.0421131	0.146678	0.415
RNF43	5-Fluorouracil 179	179	4	29	PAAD	-0.00838474	0.133564	0.48375
SMAD4	5-Fluorouracil 179	179	8	29	PAAD	0.0331734	0.12984	0.42375
TP53	5-Fluorouracil 179	179	24	29	PAAD	-0.0338993	0.128522	0.41875
gain:cnaPAAD2 (KRAS)	5-Fluorouracil 179	179	9	29	PAAD	-0.00329969	0.11392	0.4725
gain:cnaPAAD3	5-Fluorouracil 179	179	4	29	PAAD	-0.00726142	0.136851	0.4925
loss:cnaPAAD4 (CDKN2A)	5-Fluorouracil 179	179	16	29	PAAD	-0.0427103	0.121059	0.395
ARID2	5-Fluorouracil 179	179	5	52	SKCM	-0.0103671	0.134709	0.4725
BRAF	5-Fluorouracil 179	179	39	52	SKCM	-0.00965888	0.118849	0.49375
CDKN2A	5-Fluorouracil 179	179	6	52	SKCM	0.0210223	0.113994	0.44625
EZH2	5-Fluorouracil 179	179	3	52	SKCM	-0.024661	0.136597	0.43375
MECOM	5-Fluorouracil 179	179	3	52	SKCM	0.0276835	0.1455	0.4625
NF1	5-Fluorouracil 179	179	4	52	SKCM	0.0289788	0.1447	0.43875
NRAS	5-Fluorouracil 179	179	11	52	SKCM	-0.0148626	0.116193	0.47625
PLCB1	5-Fluorouracil 179	179	3	52	SKCM	0.014399	0.137757	0.46125
PTEN	5-Fluorouracil 179	179	5	52	SKCM	-0.000273157	0.11071	0.47375
TP53	5-Fluorouracil 179	179	17	52	SKCM	-0.0705435	0.169205	0.35
loss:cnaSKCM3	5-Fluorouracil 179	179	8	52	SKCM	-0.00397833	0.111487	0.49375
loss:cnaSKCM4 (BNC2,CDKN2A,JAK2,PSIP1)	5-Fluorouracil 179	179	36	52	SKCM	0.0134084	0.107454	0.46125
loss:cnaSKCM5 (PAX5)	5-Fluorouracil 179	179	4	52	SKCM	-0.0183857	0.121784	0.43
loss:cnaSKCM9	5-Fluorouracil 179	179	4	52	SKCM	0.0207526	0.145344	0.46375
gain:cnaSKCM12 (KRAS)	5-Fluorouracil 179	179	6	52	SKCM	0.0288427	0.141223	0.4425
gain:cnaSKCM21 (FOXP1,MITF)	5-Fluorouracil 179	179	7	52	SKCM	-0.00798693	0.113976	0.48625
loss:cnaSKCM22	5-Fluorouracil 179	179	7	52	SKCM	-0.00602829	0.11209	0.49
loss:cnaSKCM23	5-Fluorouracil 179	179	4	52	SKCM	0.0173119	0.132077	0.42875
loss:cnaSKCM24	5-Fluorouracil 179	179	7	52	SKCM	-0.0087423	0.103842	0.4875
loss:cnaSKCM25	5-Fluorouracil 179	179	7	52	SKCM	0.000171325	0.115109	0.49875
loss:cnaSKCM26	5-Fluorouracil 179	179	3	52	SKCM	-0.0148188	0.126176	0.43625
loss:cnaSKCM27 (CASP1)	5-Fluorouracil 179	179	6	52	SKCM	0.0341525	0.138273	0.39
loss:cnaSKCM28	5-Fluorouracil 179	179	7	52	SKCM	-0.0010554	0.113026	0.48125
loss:cnaSKCM30	5-Fluorouracil 179	179	3	52	SKCM	0.0172544	0.126523	0.4875
APC	5-Fluorouracil 179	179	3	21	STAD	-0.00720542	0.123608	0.4975
ARID1A	5-Fluorouracil 179	179	5	21	STAD	-0.0109238	0.121059	0.44875
ARID2	5-Fluorouracil 179	179	3	21	STAD	0.00210012	0.115192	0.49625
BCOR	5-Fluorouracil 179	179	3	21	STAD	-0.0152344	0.124571	0.455
CDH1	5-Fluorouracil 179	179	4	21	STAD	0.0290465	0.140428	0.4475
EP300	5-Fluorouracil 179	179	3	21	STAD	-0.0060504	0.131007	0.4725
PIK3CA	5-Fluorouracil 179	179	4	21	STAD	0.0260257	0.12271	0.4525
TP53	5-Fluorouracil 179	179	15	21	STAD	0.0538749	0.161594	0.38375
loss:cnaSTAD3	5-Fluorouracil 179	179	5	21	STAD	0.0109655	0.110435	0.44625
loss:cnaSTAD7	5-Fluorouracil 179	179	5	21	STAD	-6.1311e-05	0.118423	0.49875
loss:cnaSTAD11	5-Fluorouracil 179	179	3	21	STAD	0.0126283	0.13768	0.49875
loss:cnaSTAD12	5-Fluorouracil 179	179	4	21	STAD	-0.00789633	0.120318	0.49625
loss:cnaSTAD13	5-Fluorouracil 179	179	11	21	STAD	-0.0669843	0.167147	0.35625
loss:cnaSTAD16	5-Fluorouracil 179	179	8	21	STAD	0.0147562	0.120344	0.445
loss:cnaSTAD17 (CDKN2A)	5-Fluorouracil 179	179	8	21	STAD	0.0155953	0.132176	0.4675
gain:cnaSTAD26 (MYC)	5-Fluorouracil 179	179	6	21	STAD	-0.0109119	0.127535	0.4925
loss:cnaSTAD30	5-Fluorouracil 179	179	9	21	STAD	-0.00012346	0.112929	0.48875
loss:cnaSTAD41	5-Fluorouracil 179	179	13	21	STAD	-0.00830159	0.124701	0.46125
loss:cnaSTAD42	5-Fluorouracil 179	179	4	21	STAD	0.024816	0.141072	0.44125
gain:cnaSTAD45 (MET)	5-Fluorouracil 179	179	3	21	STAD	0.0154289	0.13462	0.4925
loss:cnaSTAD47	5-Fluorouracil 179	179	7	21	STAD	-0.00684362	0.112327	0.49625
loss:cnaSTAD48 (FAT1,IRF2)	5-Fluorouracil 179	179	8	21	STAD	-0.0166531	0.122635	0.46125
BRAF	5-Fluorouracil 179	179	7	16	THCA	-0.0653866	0.194778	0.4125
NRAS	5-Fluorouracil 179	179	3	16	THCA	0.0121318	0.142154	0.46625
TP53	5-Fluorouracil 179	179	11	16	THCA	0.0117246	0.131438	0.47125
ARID1A	681640 1046	1046	5	15	BLCA	-0.000652744	0.1368	0.49375
EP300	681640 1046	1046	4	15	BLCA	0.0156912	0.121669	0.46
MLL2	681640 1046	1046	3	15	BLCA	0.0155243	0.134079	0.46375
NRAS	681640 1046	1046	3	15	BLCA	-0.0220987	0.133728	0.44
RB1	681640 1046	1046	5	15	BLCA	0.03141	0.162766	0.445
TP53	681640 1046	1046	11	15	BLCA	-0.0337649	0.144493	0.43375
loss:cnaBLCA5 (FAT1,IRF2)	681640 1046	1046	3	15	BLCA	-0.00217707	0.131394	0.4975
gain:cnaBLCA9	681640 1046	1046	3	15	BLCA	-0.0145773	0.147075	0.47
gain:cnaBLCA15 (ASXL1)	681640 1046	1046	4	15	BLCA	0.000139775	0.13482	0.48
loss:cnaBLCA18 (CHD9,CNOT1,CYLD,MMP2,NUP93)	681640 1046	1046	3	15	BLCA	-0.0251094	0.140808	0.44875
gain:cnaBLCA23 (MYC)	681640 1046	1046	3	15	BLCA	-0.0448488	0.175636	0.42
ARID1A	681640 1046	1046	4	36	BRCA	0.00618394	0.126315	0.47875
ASH1L	681640 1046	1046	3	36	BRCA	0.00156321	0.13365	0.48875
BRCA1	681640 1046	1046	3	36	BRCA	0.0103363	0.118785	0.49
BRCA2	681640 1046	1046	5	36	BRCA	-0.00727607	0.14252	0.475
CDH1	681640 1046	1046	4	36	BRCA	0.0329206	0.145902	0.46125
MACF1	681640 1046	1046	3	36	BRCA	-0.0124353	0.121055	0.4675
MLL3	681640 1046	1046	3	36	BRCA	-0.0075298	0.125663	0.47375
NF1	681640 1046	1046	4	36	BRCA	-0.11451	0.275745	0.36625
PIK3CA	681640 1046	1046	13	36	BRCA	0.0140414	0.111334	0.445
POLR2B	681640 1046	1046	3	36	BRCA	0.00253326	0.129628	0.47875
PTEN	681640 1046	1046	4	36	BRCA	-0.0229204	0.123771	0.47
TP53	681640 1046	1046	27	36	BRCA	-0.0239896	0.141755	0.4575
gain:cnaBRCA5 (GATA3,KLF6,LARP4B,VIM)	681640 1046	1046	3	36	BRCA	0.0180222	0.13611	0.44625
loss:cnaBRCA7 (FAS,PTEN)	681640 1046	1046	4	36	BRCA	-0.0222594	0.160734	0.46
gain:cnaBRCA8 (CHD4,WNK1)	681640 1046	1046	3	36	BRCA	0.0117875	0.131039	0.48625
gain:cnaBRCA9 (KRAS)	681640 1046	1046	3	36	BRCA	0.0271806	0.14203	0.44125
gain:cnaBRCA10 (MDM2,NUP107)	681640 1046	1046	3	36	BRCA	0.0140577	0.139898	0.46125
gain:cnaBRCA12 (TERT)	681640 1046	1046	8	36	BRCA	0.0306673	0.135414	0.43125
gain:cnaBRCA13 (FGFR1,WHSC1L1)	681640 1046	1046	6	36	BRCA	0.0102712	0.131029	0.46
gain:cnaBRCA14 (RAD21)	681640 1046	1046	17	36	BRCA	0.0107526	0.124859	0.46
gain:cnaBRCA15	681640 1046	1046	19	36	BRCA	-0.0058834	0.115349	0.46
gain:cnaBRCA16	681640 1046	1046	13	36	BRCA	0.00317656	0.113539	0.49125
loss:cnaBRCA17	681640 1046	1046	6	36	BRCA	-0.00580408	0.132787	0.4875
loss:cnaBRCA18	681640 1046	1046	12	36	BRCA	0.00086717	0.130512	0.49625
gain:cnaBRCA19	681640 1046	1046	3	36	BRCA	0.00899248	0.151446	0.49375
loss:cnaBRCA20	681640 1046	1046	3	36	BRCA	0.000949629	0.120637	0.48625
loss:cnaBRCA22 (SYNCRIP,ZNF292)	681640 1046	1046	15	36	BRCA	-0.013674	0.117197	0.46125
loss:cnaBRCA25 (ARID1B,MAP3K4,MLLT4)	681640 1046	1046	5	36	BRCA	0.00213627	0.113635	0.49375
gain:cnaBRCA26 (CDK12,ERBB2,MED24)	681640 1046	1046	12	36	BRCA	0.0253031	0.122948	0.42125
gain:cnaBRCA27 (CLTC,PPM1D)	681640 1046	1046	9	36	BRCA	0.02955	0.138994	0.42625
loss:cnaBRCA28 (GPS2)	681640 1046	1046	3	36	BRCA	-0.0121382	0.130228	0.4425
loss:cnaBRCA29 (MAP2K4)	681640 1046	1046	5	36	BRCA	-0.00425404	0.129692	0.46875
gain:cnaBRCA30 (CRNKL1,FOXA2)	681640 1046	1046	4	36	BRCA	0.0366783	0.148511	0.43375
gain:cnaBRCA31	681640 1046	1046	11	36	BRCA	-0.0174763	0.122483	0.46625
loss:cnaBRCA32 (PABPC3,SACS,ZMYM2)	681640 1046	1046	6	36	BRCA	-0.0450227	0.157846	0.42875
loss:cnaBRCA33	681640 1046	1046	4	36	BRCA	0.0142349	0.135848	0.4725
loss:cnaBRCA34	681640 1046	1046	3	36	BRCA	-0.0150181	0.138965	0.495
loss:cnaBRCA36 (FAT1,IRF2)	681640 1046	1046	8	36	BRCA	-0.0308292	0.137479	0.41375
loss:cnaBRCA38	681640 1046	1046	3	36	BRCA	-0.00440331	0.136035	0.48875
gain:cnaBRCA39 (FOXA1,NKX2-1,PSMA6)	681640 1046	1046	6	36	BRCA	0.00642078	0.136726	0.45875
gain:cnaBRCA47 (EGFR)	681640 1046	1046	5	36	BRCA	0.020033	0.136593	0.46875
gain:cnaBRCA48	681640 1046	1046	3	36	BRCA	0.00610614	0.134389	0.475
loss:cnaBRCA57	681640 1046	1046	3	36	BRCA	0.00371186	0.132948	0.49125
gain:cnaBRCA58 (CCND1)	681640 1046	1046	6	36	BRCA	0.0252704	0.145275	0.42375
gain:cnaBRCA62	681640 1046	1046	7	36	BRCA	0.0166461	0.129746	0.465
gain:cnaBRCA63	681640 1046	1046	5	36	BRCA	0.0212918	0.122027	0.475
gain:cnaBRCA64 (SDHC)	681640 1046	1046	6	36	BRCA	0.0193	0.137476	0.44625
AKAP9	681640 1046	1046	7	39	COREAD	-0.0514997	0.151415	0.3675
APC	681640 1046	1046	27	39	COREAD	0.0121392	0.111603	0.475
ARID1A	681640 1046	1046	8	39	COREAD	-0.123111	0.236258	0.30375
ARID2	681640 1046	1046	5	39	COREAD	0.0180376	0.114909	0.44125
ASPM	681640 1046	1046	6	39	COREAD	-0.0774221	0.218447	0.385
ATM	681640 1046	1046	3	39	COREAD	0.0226078	0.152149	0.43375
ATRX	681640 1046	1046	3	39	COREAD	0.00131774	0.120458	0.4875
B2M	681640 1046	1046	8	39	COREAD	-0.0816199	0.18236	0.3475
BCOR	681640 1046	1046	5	39	COREAD	-0.0140907	0.1245	0.47125
BMPR2	681640 1046	1046	13	39	COREAD	-0.205783	0.308474	0.23
BPTF	681640 1046	1046	4	39	COREAD	-0.0253415	0.131692	0.42125
BRAF	681640 1046	1046	11	39	COREAD	0.0320583	0.126572	0.4325
CHD4	681640 1046	1046	3	39	COREAD	0.00932107	0.132579	0.47
CHD9	681640 1046	1046	7	39	COREAD	-0.0793031	0.184139	0.36875
CREBBP	681640 1046	1046	7	39	COREAD	0.0235979	0.133705	0.45375
CTCF	681640 1046	1046	6	39	COREAD	-0.0335402	0.13179	0.4275
CTNNB1	681640 1046	1046	6	39	COREAD	-0.0423914	0.149344	0.385
DNMT3A	681640 1046	1046	3	39	COREAD	0.0220655	0.135622	0.4475
EGFR	681640 1046	1046	4	39	COREAD	-0.000723091	0.128998	0.4975
ELF3	681640 1046	1046	3	39	COREAD	-0.0191917	0.131897	0.4775
EP300	681640 1046	1046	12	39	COREAD	-0.0125539	0.107032	0.4725
FAM123B	681640 1046	1046	4	39	COREAD	0.020187	0.143434	0.4625
FBXW7	681640 1046	1046	9	39	COREAD	-0.0161125	0.114692	0.495
ITSN1	681640 1046	1046	3	39	COREAD	-0.109172	0.24898	0.34
KDM6A	681640 1046	1046	3	39	COREAD	-0.0231361	0.143458	0.45875
KRAS	681640 1046	1046	18	39	COREAD	-0.0115517	0.105259	0.4475
LARP4B	681640 1046	1046	4	39	COREAD	-0.0353342	0.140226	0.41875
LPHN2	681640 1046	1046	3	39	COREAD	0.026373	0.134002	0.4225
MAP2K4	681640 1046	1046	3	39	COREAD	0.0206395	0.141433	0.4625
MAP3K4	681640 1046	1046	3	39	COREAD	-0.0227902	0.13823	0.4575
MECOM	681640 1046	1046	4	39	COREAD	-0.0294988	0.135881	0.4325
MGA	681640 1046	1046	4	39	COREAD	-0.0240658	0.12075	0.41625
MLL2	681640 1046	1046	12	39	COREAD	-0.110583	0.207882	0.32375
NCOR1	681640 1046	1046	6	39	COREAD	-0.00874119	0.117468	0.49375
NF1	681640 1046	1046	6	39	COREAD	0.00560058	0.124947	0.495
NR4A2	681640 1046	1046	5	39	COREAD	-0.037661	0.143102	0.4025
NUP98	681640 1046	1046	5	39	COREAD	-0.00649337	0.114941	0.46125
PBRM1	681640 1046	1046	3	39	COREAD	0.0260309	0.147414	0.44625
PIK3CA	681640 1046	1046	12	39	COREAD	0.0119719	0.1178	0.46375
PIK3R1	681640 1046	1046	3	39	COREAD	0.0363553	0.151719	0.41875
POLR2B	681640 1046	1046	3	39	COREAD	0.0206006	0.141362	0.44875
PTEN	681640 1046	1046	4	39	COREAD	0.00403918	0.144697	0.4675
RNF43	681640 1046	1046	9	39	COREAD	-0.0319765	0.121155	0.4275
SACS	681640 1046	1046	7	39	COREAD	-0.000606233	0.108367	0.49
SMAD4	681640 1046	1046	5	39	COREAD	-0.00891188	0.104971	0.4825
SMARCA4	681640 1046	1046	4	39	COREAD	0.011388	0.125958	0.455
SOS2	681640 1046	1046	5	39	COREAD	-0.0878825	0.199841	0.34
SOX9	681640 1046	1046	5	39	COREAD	-0.00346943	0.155361	0.4925
TP53	681640 1046	1046	29	39	COREAD	0.0503019	0.139699	0.3675
TP53BP1	681640 1046	1046	3	39	COREAD	-0.00689312	0.136995	0.48875
TRIO	681640 1046	1046	5	39	COREAD	-0.106882	0.23342	0.3325
ZC3H11A	681640 1046	1046	3	39	COREAD	-0.00944039	0.128717	0.4975
loss:cnaCOREAD11	681640 1046	1046	16	39	COREAD	-0.0306905	0.128518	0.42625
loss:cnaCOREAD12 (PCDH18)	681640 1046	1046	3	39	COREAD	0.00344897	0.142225	0.495
loss:cnaCOREAD14	681640 1046	1046	3	39	COREAD	0.00220681	0.13488	0.495
loss:cnaCOREAD18	681640 1046	1046	9	39	COREAD	-0.000692911	0.11549	0.48375
loss:cnaCOREAD19	681640 1046	1046	15	39	COREAD	-0.00884005	0.103434	0.48875
loss:cnaCOREAD24	681640 1046	1046	9	39	COREAD	-0.0239712	0.116649	0.4525
gain:cnaCOREAD31	681640 1046	1046	5	39	COREAD	0.0386296	0.144423	0.42625
gain:cnaCOREAD32 (STK4)	681640 1046	1046	7	39	COREAD	0.0170494	0.135381	0.45
loss:cnaCOREAD33	681640 1046	1046	20	39	COREAD	0.0331647	0.122329	0.4025
gain:cnaCOREAD35 (FLT3,WASF3)	681640 1046	1046	6	39	COREAD	0.0395761	0.13458	0.38375
gain:cnaCOREAD36	681640 1046	1046	3	39	COREAD	0.0467146	0.164112	0.4
gain:cnaCOREAD37 (ING1,IRS2,TFDP1)	681640 1046	1046	4	39	COREAD	0.0428742	0.148478	0.41625
loss:cnaCOREAD38 (CDKN2A)	681640 1046	1046	5	39	COREAD	0.00229552	0.131438	0.47
gain:cnaCOREAD47 (MYC)	681640 1046	1046	4	39	COREAD	0.00768232	0.13482	0.48625
loss:cnaCOREAD48	681640 1046	1046	4	39	COREAD	0.00105298	0.112122	0.475
loss:cnaCOREAD49	681640 1046	1046	13	39	COREAD	-0.0246818	0.106792	0.39875
loss:cnaCOREAD54 (SMAD4)	681640 1046	1046	9	39	COREAD	0.00954103	0.108663	0.49125
loss:cnaCOREAD55	681640 1046	1046	8	39	COREAD	0.0065073	0.117646	0.48875
loss:cnaCOREAD56	681640 1046	1046	8	39	COREAD	0.00972332	0.106797	0.47375
loss:cnaCOREAD63 (APC)	681640 1046	1046	6	39	COREAD	-0.0110724	0.126846	0.46875
loss:cnaCOREAD65	681640 1046	1046	26	39	COREAD	-0.0318674	0.134134	0.3975
ARID1A	681640 1046	1046	3	32	DLBC	0.00730394	0.129053	0.4925
CREBBP	681640 1046	1046	7	32	DLBC	-0.0182447	0.12988	0.44125
EP300	681640 1046	1046	6	32	DLBC	0.0185125	0.11603	0.43875
MLL2	681640 1046	1046	9	32	DLBC	-0.0218664	0.123366	0.4775
PTEN	681640 1046	1046	5	32	DLBC	0.00692329	0.12945	0.495
TP53	681640 1046	1046	19	32	DLBC	0.00421757	0.119987	0.49875
loss:cnaDLBC2	681640 1046	1046	3	32	DLBC	0.0118808	0.135519	0.47
loss:cnaDLBC4 (CDKN2A)	681640 1046	1046	8	32	DLBC	-0.028828	0.121666	0.39625
EP300	681640 1046	1046	3	26	ESCA	-0.0441101	0.153533	0.395
MLL2	681640 1046	1046	3	26	ESCA	0.0288334	0.146809	0.43875
NOTCH1	681640 1046	1046	4	26	ESCA	-0.0288552	0.139619	0.41625
PIK3CA	681640 1046	1046	3	26	ESCA	0.0221487	0.132242	0.43375
SMAD4	681640 1046	1046	4	26	ESCA	0.00209325	0.133823	0.485
loss:cnaESCA1	681640 1046	1046	4	26	ESCA	0.0243614	0.138915	0.44375
gain:cnaESCA2 (KRAS)	681640 1046	1046	3	26	ESCA	-0.0323205	0.138699	0.43375
gain:cnaESCA3 (KRAS)	681640 1046	1046	3	26	ESCA	-0.0290083	0.146315	0.43125
loss:cnaESCA5 (PAX5)	681640 1046	1046	3	26	ESCA	0.057281	0.17685	0.3825
gain:cnaESCA7 (ERBB2)	681640 1046	1046	8	26	ESCA	0.0729137	0.181891	0.365
gain:cnaESCA9 (EGFR)	681640 1046	1046	5	26	ESCA	-0.00513562	0.114213	0.48
gain:cnaESCA11 (CCND1,CTTN)	681640 1046	1046	13	26	ESCA	-0.0241592	0.131549	0.46
loss:cnaESCA12	681640 1046	1046	7	26	ESCA	0.0230707	0.114485	0.43125
loss:cnaESCA14	681640 1046	1046	7	26	ESCA	0.0194001	0.131604	0.45125
NF1	681640 1046	1046	7	32	GBM	-0.0358446	0.134991	0.44125
PTEN	681640 1046	1046	16	32	GBM	0.0166719	0.124496	0.435
RB1	681640 1046	1046	5	32	GBM	0.0342663	0.144191	0.45
TP53	681640 1046	1046	18	32	GBM	-0.0278507	0.123925	0.43875
loss:cnaGBM1	681640 1046	1046	3	32	GBM	0.0382087	0.140015	0.3975
loss:cnaGBM2 (CDKN2A)	681640 1046	1046	23	32	GBM	-0.01878	0.123591	0.47625
loss:cnaGBM19 (FAT1,IRF2)	681640 1046	1046	5	32	GBM	0.00471937	0.114199	0.4975
gain:cnaGBM25 (CDK4)	681640 1046	1046	4	32	GBM	0.0354817	0.159764	0.41875
loss:cnaGBM45	681640 1046	1046	3	32	GBM	-0.00490822	0.134266	0.48375
loss:cnaGBM47	681640 1046	1046	5	32	GBM	0.000995796	0.131756	0.5
loss:cnaGBM68 (CDKN2C,FAF1)	681640 1046	1046	5	32	GBM	-0.0518291	0.150203	0.37625
gain:cnaGBM71 (SOX2)	681640 1046	1046	3	32	GBM	0.0323198	0.133972	0.43625
loss:cnaGBM93	681640 1046	1046	5	32	GBM	0.0208057	0.122987	0.44125
loss:cnaGBM94	681640 1046	1046	5	32	GBM	0.0085013	0.119748	0.48125
loss:cnaGBM95	681640 1046	1046	5	32	GBM	0.0097009	0.128542	0.495
loss:cnaGBM97	681640 1046	1046	3	32	GBM	-0.0134184	0.133746	0.4825
loss:cnaGBM98	681640 1046	1046	3	32	GBM	-0.0159929	0.129311	0.4575
loss:cnaGBM99 (ANK3)	681640 1046	1046	3	32	GBM	-0.0159463	0.131012	0.4625
loss:cnaGBM100	681640 1046	1046	3	32	GBM	-0.0198328	0.143379	0.455
loss:cnaGBM101	681640 1046	1046	4	32	GBM	-0.0104929	0.127713	0.47375
loss:cnaGBM102	681640 1046	1046	3	32	GBM	-0.0177716	0.135756	0.45125
loss:cnaGBM103	681640 1046	1046	3	32	GBM	-0.0214751	0.145086	0.4575
loss:cnaGBM104	681640 1046	1046	3	32	GBM	-0.0165906	0.128933	0.48125
loss:cnaGBM105	681640 1046	1046	3	32	GBM	-0.0075486	0.117909	0.445
loss:cnaGBM106	681640 1046	1046	3	32	GBM	-0.0166453	0.118394	0.445
gain:cnaGBM122	681640 1046	1046	8	32	GBM	-0.00449422	0.107005	0.4925
gain:cnaGBM123 (EGFR)	681640 1046	1046	9	32	GBM	0.0245733	0.118162	0.41125
gain:cnaGBM124	681640 1046	1046	3	32	GBM	0.0347374	0.138172	0.41
gain:cnaGBM125 (AKAP9)	681640 1046	1046	8	32	GBM	-0.00795365	0.111189	0.4825
loss:cnaGBM132	681640 1046	1046	3	32	GBM	0.0271785	0.157497	0.44375
loss:cnaGBM133	681640 1046	1046	3	32	GBM	0.0321373	0.1503	0.46125
CASP8	681640 1046	1046	5	25	HNSC	0.0593695	0.166905	0.375
CDKN2A	681640 1046	1046	5	25	HNSC	0.046345	0.167714	0.39875
FAT1	681640 1046	1046	4	25	HNSC	0.00379605	0.110863	0.4875
HLA-A	681640 1046	1046	3	25	HNSC	0.0226543	0.139131	0.4475
NFE2L2	681640 1046	1046	3	25	HNSC	0.0479057	0.179578	0.41125
PIK3CA	681640 1046	1046	7	25	HNSC	0.0145166	0.126204	0.45
SMAD4	681640 1046	1046	3	25	HNSC	0.00878207	0.136092	0.48625
TP53	681640 1046	1046	21	25	HNSC	-0.00610356	0.112814	0.48375
gain:cnaHNSC1 (ACTB,CARD11,PMS2,RAC1)	681640 1046	1046	3	25	HNSC	-0.011691	0.120206	0.47375
gain:cnaHNSC2 (EGFR)	681640 1046	1046	7	25	HNSC	-0.0380254	0.128747	0.40125
loss:cnaHNSC3	681640 1046	1046	3	25	HNSC	-0.0168393	0.141411	0.46375
loss:cnaHNSC6	681640 1046	1046	11	25	HNSC	0.00369797	0.111702	0.4875
loss:cnaHNSC11 (CDKN2A)	681640 1046	1046	10	25	HNSC	-0.0267864	0.123457	0.42875
gain:cnaHNSC14 (ASXL1)	681640 1046	1046	4	25	HNSC	-0.15798	0.286362	0.265
gain:cnaHNSC17 (CCND1,CTTN)	681640 1046	1046	6	25	HNSC	-0.0381364	0.134369	0.41125
loss:cnaHNSC20	681640 1046	1046	13	25	HNSC	-0.0303153	0.132183	0.43375
loss:cnaHNSC26	681640 1046	1046	10	25	HNSC	0.0206324	0.126862	0.4625
loss:cnaHNSC28 (ATP1A1,CSDE1,NRAS)	681640 1046	1046	3	25	HNSC	-0.0251927	0.140178	0.425
loss:cnaHNSC29	681640 1046	1046	5	25	HNSC	-0.063105	0.16073	0.37375
loss:cnaHNSC32 (FAT1)	681640 1046	1046	9	25	HNSC	0.0500604	0.156626	0.3725
PBRM1	681640 1046	1046	3	14	KIRC	0.0303633	0.141373	0.44875
TP53	681640 1046	1046	5	14	KIRC	-0.00640689	0.117645	0.48125
VHL	681640 1046	1046	7	14	KIRC	0.00898598	0.137285	0.47875
loss:cnaKIRC12	681640 1046	1046	5	14	KIRC	0.016677	0.131857	0.4725
loss:cnaKIRC13	681640 1046	1046	5	14	KIRC	0.0291577	0.143198	0.43625
loss:cnaKIRC14	681640 1046	1046	5	14	KIRC	0.0226779	0.147439	0.46375
loss:cnaKIRC15	681640 1046	1046	5	14	KIRC	0.0233762	0.136764	0.44625
loss:cnaKIRC16	681640 1046	1046	3	14	KIRC	0.0260955	0.143292	0.45625
loss:cnaKIRC19	681640 1046	1046	3	14	KIRC	0.022164	0.142442	0.46125
loss:cnaKIRC22	681640 1046	1046	4	14	KIRC	0.0150336	0.142061	0.49
loss:cnaKIRC24 (FAT1,IRF2)	681640 1046	1046	4	14	KIRC	0.0132274	0.136746	0.4775
ASXL1	681640 1046	1046	3	23	LAML	-0.00411894	0.138252	0.48625
CREBBP	681640 1046	1046	3	23	LAML	0.0302467	0.137007	0.40125
NRAS	681640 1046	1046	7	23	LAML	0.0293515	0.140183	0.44375
SACS	681640 1046	1046	3	23	LAML	0.00418299	0.135992	0.485
TP53	681640 1046	1046	12	23	LAML	-0.0334637	0.152289	0.41375
RB1	681640 1046	1046	6	14	LGG	-0.00466228	0.119546	0.47125
TP53	681640 1046	1046	9	14	LGG	0.025338	0.149531	0.4325
loss:cnaLGG1 (BNC2,CDKN2A,JAK2,PSIP1)	681640 1046	1046	9	14	LGG	0.0012018	0.123198	0.4975
loss:cnaLGG7 (RPL22)	681640 1046	1046	3	14	LGG	0.0185943	0.126983	0.4525
loss:cnaLGG14 (CUL2)	681640 1046	1046	4	14	LGG	0.0527953	0.179875	0.3775
gain:cnaLGG16 (EGFR)	681640 1046	1046	4	14	LGG	-0.084204	0.213744	0.33875
TP53	681640 1046	1046	10	13	LIHC	0.0299677	0.140586	0.4575
loss:cnaLIHC7 (CDKN2A)	681640 1046	1046	4	13	LIHC	-0.0112828	0.132423	0.49
loss:cnaLIHC10 (RB1)	681640 1046	1046	2	13	LIHC	0.0109375	0.132724	0.47375
EGFR	681640 1046	1046	4	47	LUAD	-0.00453623	0.124181	0.475
KRAS	681640 1046	1046	15	47	LUAD	-0.0996314	0.20328	0.315
MGA	681640 1046	1046	3	47	LUAD	0.0186875	0.146811	0.47625
SMARCA4	681640 1046	1046	8	47	LUAD	-0.0373012	0.135399	0.41125
STK11	681640 1046	1046	7	47	LUAD	-0.0305111	0.122667	0.4275
TP53	681640 1046	1046	39	47	LUAD	-0.0202649	0.120277	0.46
loss:cnaLUAD1 (CDKN2A)	681640 1046	1046	25	47	LUAD	-0.0342388	0.126971	0.42625
loss:cnaLUAD2 (PAX5)	681640 1046	1046	3	47	LUAD	0.0282102	0.152691	0.4175
gain:cnaLUAD3 (TERT)	681640 1046	1046	11	47	LUAD	-0.0128666	0.114148	0.44125
gain:cnaLUAD5 (CUL2,EPC1)	681640 1046	1046	4	47	LUAD	0.0291724	0.154636	0.4175
loss:cnaLUAD9	681640 1046	1046	3	47	LUAD	0.0122728	0.135789	0.485
gain:cnaLUAD10 (AHR,HDAC9)	681640 1046	1046	7	47	LUAD	0.0393194	0.164972	0.43875
gain:cnaLUAD11 (EGFR)	681640 1046	1046	8	47	LUAD	0.0145705	0.116879	0.455
gain:cnaLUAD12	681640 1046	1046	4	47	LUAD	-0.0363555	0.140415	0.415
gain:cnaLUAD13 (MET)	681640 1046	1046	5	47	LUAD	0.0390933	0.154796	0.415
loss:cnaLUAD14	681640 1046	1046	5	47	LUAD	-0.0132864	0.132925	0.4575
loss:cnaLUAD15	681640 1046	1046	4	47	LUAD	0.0346839	0.1409	0.41375
loss:cnaLUAD16	681640 1046	1046	3	47	LUAD	0.0180557	0.143419	0.48125
gain:cnaLUAD17 (KRAS)	681640 1046	1046	5	47	LUAD	-0.0187941	0.128409	0.45125
gain:cnaLUAD18	681640 1046	1046	7	47	LUAD	-0.0149523	0.119823	0.4575
gain:cnaLUAD19 (CDK4)	681640 1046	1046	6	47	LUAD	0.0358723	0.133662	0.4175
gain:cnaLUAD21 (FOXA2)	681640 1046	1046	5	47	LUAD	0.0153334	0.12847	0.45625
gain:cnaLUAD22 (ASXL1)	681640 1046	1046	6	47	LUAD	-0.0306194	0.135053	0.405
gain:cnaLUAD23 (ARFGAP1)	681640 1046	1046	4	47	LUAD	0.0389971	0.160908	0.4175
loss:cnaLUAD25	681640 1046	1046	3	47	LUAD	0.0233126	0.136692	0.46125
gain:cnaLUAD27 (MYC)	681640 1046	1046	15	47	LUAD	0.00790588	0.114896	0.44875
loss:cnaLUAD28	681640 1046	1046	9	47	LUAD	-0.0124081	0.109085	0.47625
loss:cnaLUAD29 (TFDP1)	681640 1046	1046	7	47	LUAD	0.0158067	0.124068	0.4825
gain:cnaLUAD30 (CCND1)	681640 1046	1046	6	47	LUAD	-0.0145604	0.132244	0.48
gain:cnaLUAD32	681640 1046	1046	3	47	LUAD	0.0275648	0.141539	0.41875
loss:cnaLUAD34 (FAT1,IRF2)	681640 1046	1046	14	47	LUAD	0.0244453	0.132777	0.43625
gain:cnaLUAD35 (MECOM)	681640 1046	1046	4	47	LUAD	0.0223402	0.145819	0.4525
PIK3CA	681640 1046	1046	4	11	OV	0.0059936	0.13604	0.49125
gain:cnaOV4 (KRAS)	681640 1046	1046	4	11	OV	0.0113923	0.135643	0.48625
gain:cnaOV18 (CCNE1)	681640 1046	1046	3	11	OV	0.0211337	0.156797	0.45
loss:cnaOV39	681640 1046	1046	3	11	OV	-0.00632799	0.119166	0.49625
loss:cnaOV40	681640 1046	1046	3	11	OV	-0.0272147	0.147299	0.45375
loss:cnaOV43 (NF1)	681640 1046	1046	3	11	OV	0.0281792	0.151895	0.43625
gain:cnaOV51 (MYC)	681640 1046	1046	3	11	OV	0.0269458	0.148902	0.47125
loss:cnaOV52	681640 1046	1046	3	11	OV	-0.00651246	0.119428	0.49125
loss:cnaOV53	681640 1046	1046	3	11	OV	0.00114935	0.126161	0.4975
loss:cnaOV54	681640 1046	1046	3	11	OV	0.0174774	0.134479	0.4675
gain:cnaOV72 (ASXL1)	681640 1046	1046	3	11	OV	0.014431	0.129921	0.4775
loss:cnaOV85	681640 1046	1046	3	11	OV	-0.0110867	0.128074	0.48
gain:cnaOV95 (MECOM)	681640 1046	1046	4	11	OV	0.0462703	0.171051	0.41625
EP300	681640 1046	1046	3	20	PAAD	0.00792977	0.156944	0.47625
RNF43	681640 1046	1046	3	20	PAAD	0.0104349	0.149812	0.49375
SMAD4	681640 1046	1046	5	20	PAAD	0.00606889	0.11822	0.485
gain:cnaPAAD2 (KRAS)	681640 1046	1046	8	20	PAAD	0.00609932	0.112705	0.4925
loss:cnaPAAD4 (CDKN2A)	681640 1046	1046	13	20	PAAD	-0.0132106	0.134121	0.44
ARID2	681640 1046	1046	3	41	SKCM	-0.0183431	0.12166	0.44125
BRAF	681640 1046	1046	31	41	SKCM	0.0242929	0.116362	0.4475
CDKN2A	681640 1046	1046	4	41	SKCM	-0.0295532	0.128952	0.41375
EZH2	681640 1046	1046	3	41	SKCM	0.00447753	0.127534	0.49375
NRAS	681640 1046	1046	9	41	SKCM	0.00593144	0.114802	0.49625
PTEN	681640 1046	1046	4	41	SKCM	-0.00481965	0.12728	0.48875
TP53	681640 1046	1046	12	41	SKCM	-0.260827	0.327399	0.18375
loss:cnaSKCM3	681640 1046	1046	5	41	SKCM	-0.0306989	0.139581	0.4225
loss:cnaSKCM4 (BNC2,CDKN2A,JAK2,PSIP1)	681640 1046	1046	30	41	SKCM	0.0396571	0.132967	0.42125
loss:cnaSKCM5 (PAX5)	681640 1046	1046	3	41	SKCM	-0.0235181	0.130848	0.44625
loss:cnaSKCM9	681640 1046	1046	3	41	SKCM	-0.0295754	0.13253	0.425
gain:cnaSKCM12 (KRAS)	681640 1046	1046	7	41	SKCM	-0.0367673	0.143565	0.42375
gain:cnaSKCM21 (FOXP1,MITF)	681640 1046	1046	6	41	SKCM	0.00534817	0.134291	0.49125
loss:cnaSKCM22	681640 1046	1046	6	41	SKCM	-0.0571301	0.169181	0.37875
loss:cnaSKCM23	681640 1046	1046	4	41	SKCM	-0.0328049	0.134802	0.41875
loss:cnaSKCM24	681640 1046	1046	7	41	SKCM	0.000386728	0.120325	0.4825
loss:cnaSKCM25	681640 1046	1046	7	41	SKCM	-0.00296996	0.118076	0.475
loss:cnaSKCM26	681640 1046	1046	3	41	SKCM	-0.00714689	0.11612	0.46625
loss:cnaSKCM27 (CASP1)	681640 1046	1046	6	41	SKCM	0.000148892	0.113241	0.4675
loss:cnaSKCM28	681640 1046	1046	5	41	SKCM	-0.00300893	0.120782	0.4975
loss:cnaSKCM30	681640 1046	1046	4	41	SKCM	-0.0250605	0.130535	0.45875
APC	681640 1046	1046	3	21	STAD	0.0238485	0.14187	0.42875
ARID1A	681640 1046	1046	3	21	STAD	-0.0123517	0.136545	0.46
ARID2	681640 1046	1046	3	21	STAD	0.00626382	0.122311	0.49
CDH1	681640 1046	1046	3	21	STAD	0.0287447	0.147012	0.42
EP300	681640 1046	1046	3	21	STAD	-0.00822308	0.132066	0.47375
PIK3CA	681640 1046	1046	3	21	STAD	0.0152157	0.132488	0.4625
TP53	681640 1046	1046	15	21	STAD	-0.0245097	0.141745	0.4425
loss:cnaSTAD3	681640 1046	1046	4	21	STAD	0.0278073	0.142967	0.41625
loss:cnaSTAD7	681640 1046	1046	3	21	STAD	-0.00950407	0.128973	0.46125
loss:cnaSTAD11	681640 1046	1046	3	21	STAD	-0.0424587	0.156829	0.4375
loss:cnaSTAD12	681640 1046	1046	3	21	STAD	-0.0300123	0.14377	0.43375
loss:cnaSTAD13	681640 1046	1046	12	21	STAD	0.0054431	0.105889	0.47
loss:cnaSTAD16	681640 1046	1046	8	21	STAD	-0.00131216	0.130922	0.48625
loss:cnaSTAD17 (CDKN2A)	681640 1046	1046	8	21	STAD	-0.0658158	0.192791	0.36625
gain:cnaSTAD26 (MYC)	681640 1046	1046	7	21	STAD	0.00941956	0.125111	0.45375
gain:cnaSTAD28 (FOXA2)	681640 1046	1046	3	21	STAD	0.0140124	0.140449	0.475
gain:cnaSTAD29 (STK4)	681640 1046	1046	3	21	STAD	0.0109761	0.133626	0.48125
loss:cnaSTAD30	681640 1046	1046	9	21	STAD	0.0475759	0.163308	0.39125
loss:cnaSTAD41	681640 1046	1046	13	21	STAD	0.074725	0.194738	0.3525
loss:cnaSTAD47	681640 1046	1046	8	21	STAD	0.0195108	0.135577	0.475
loss:cnaSTAD48 (FAT1,IRF2)	681640 1046	1046	7	21	STAD	-0.0300215	0.127184	0.43625
BRAF	681640 1046	1046	6	12	THCA	-0.0159556	0.120088	0.43625
TP53	681640 1046	1046	7	12	THCA	0.0203411	0.142468	0.4775
PIK3CA	A-443654 86	86	4	12	BRCA	-0.0430947	0.13356	0.39375
TP53	A-443654 86	86	9	12	BRCA	-0.00609681	0.108767	0.49
gain:cnaBRCA13 (FGFR1,WHSC1L1)	A-443654 86	86	3	12	BRCA	-0.0179738	0.119555	0.4725
gain:cnaBRCA14 (RAD21)	A-443654 86	86	6	12	BRCA	-0.0361515	0.122328	0.3925
gain:cnaBRCA15	A-443654 86	86	6	12	BRCA	-0.0530214	0.13613	0.3775
gain:cnaBRCA16	A-443654 86	86	3	12	BRCA	-0.0366326	0.118803	0.40875
loss:cnaBRCA17	A-443654 86	86	3	12	BRCA	-0.0125275	0.106512	0.4575
loss:cnaBRCA18	A-443654 86	86	5	12	BRCA	0.0132657	0.111693	0.455
loss:cnaBRCA22 (SYNCRIP,ZNF292)	A-443654 86	86	3	12	BRCA	-0.023087	0.122446	0.425
gain:cnaBRCA26 (CDK12,ERBB2,MED24)	A-443654 86	86	3	12	BRCA	-0.0254393	0.121417	0.45
gain:cnaBRCA27 (CLTC,PPM1D)	A-443654 86	86	3	12	BRCA	-0.0199906	0.118502	0.4675
gain:cnaBRCA31	A-443654 86	86	3	12	BRCA	0.0104484	0.104164	0.46375
loss:cnaBRCA32 (PABPC3,SACS,ZMYM2)	A-443654 86	86	3	12	BRCA	0.0567457	0.142214	0.3775
loss:cnaBRCA33	A-443654 86	86	4	12	BRCA	0.0267298	0.117208	0.42625
gain:cnaBRCA62	A-443654 86	86	4	12	BRCA	0.0220904	0.122883	0.435
AKAP9	A-443654 86	86	3	15	COREAD	-0.00384446	0.108089	0.455
APC	A-443654 86	86	10	15	COREAD	-0.0103921	0.110029	0.48625
ARID1A	A-443654 86	86	5	15	COREAD	-0.0129473	0.108485	0.45125
BPTF	A-443654 86	86	3	15	COREAD	-0.00592775	0.113163	0.46
BRAF	A-443654 86	86	5	15	COREAD	-0.0252939	0.123968	0.43375
CHD9	A-443654 86	86	3	15	COREAD	-0.0070766	0.117532	0.48125
EP300	A-443654 86	86	4	15	COREAD	-0.0250502	0.120517	0.4325
KRAS	A-443654 86	86	6	15	COREAD	-0.02082	0.117703	0.45375
MGA	A-443654 86	86	3	15	COREAD	0.0245216	0.126844	0.45
NF1	A-443654 86	86	3	15	COREAD	-0.00344694	0.118667	0.49375
PTEN	A-443654 86	86	3	15	COREAD	-0.00543298	0.118128	0.48375
RNF43	A-443654 86	86	5	15	COREAD	-0.0551696	0.156822	0.36375
TP53	A-443654 86	86	11	15	COREAD	-0.0404167	0.127568	0.4025
loss:cnaCOREAD11	A-443654 86	86	3	15	COREAD	-0.0384673	0.124588	0.3975
loss:cnaCOREAD19	A-443654 86	86	4	15	COREAD	-0.0988654	0.204463	0.335
loss:cnaCOREAD24	A-443654 86	86	4	15	COREAD	0.00597314	0.123988	0.47125
gain:cnaCOREAD32 (STK4)	A-443654 86	86	3	15	COREAD	0.0402726	0.161765	0.425
loss:cnaCOREAD33	A-443654 86	86	6	15	COREAD	-0.0554807	0.136843	0.385
loss:cnaCOREAD38 (CDKN2A)	A-443654 86	86	4	15	COREAD	-0.00569482	0.112565	0.475
loss:cnaCOREAD49	A-443654 86	86	6	15	COREAD	0.024647	0.115792	0.4275
loss:cnaCOREAD54 (SMAD4)	A-443654 86	86	5	15	COREAD	-0.0519063	0.146322	0.37125
loss:cnaCOREAD55	A-443654 86	86	5	15	COREAD	-0.0502325	0.147602	0.385
loss:cnaCOREAD56	A-443654 86	86	5	15	COREAD	-0.0560165	0.144013	0.35
loss:cnaCOREAD65	A-443654 86	86	9	15	COREAD	-0.00893641	0.111957	0.48375
ARID1A	A-443654 86	86	3	25	DLBC	0.00271727	0.0961764	0.48125
CREBBP	A-443654 86	86	6	25	DLBC	-0.00863006	0.0866463	0.48
EP300	A-443654 86	86	5	25	DLBC	0.0147545	0.0967497	0.44875
MLL2	A-443654 86	86	8	25	DLBC	-0.0235721	0.0904935	0.4325
PTEN	A-443654 86	86	4	25	DLBC	0.129606	0.209391	0.26875
TP53	A-443654 86	86	15	25	DLBC	-0.0313208	0.09269	0.3575
loss:cnaDLBC2	A-443654 86	86	4	25	DLBC	-0.000793103	0.100822	0.485
loss:cnaDLBC4 (CDKN2A)	A-443654 86	86	8	25	DLBC	0.0205366	0.0897612	0.4075
NOTCH1	A-443654 86	86	3	11	ESCA	-0.00879565	0.119677	0.49375
gain:cnaESCA11 (CCND1,CTTN)	A-443654 86	86	7	11	ESCA	0.023061	0.129196	0.44625
loss:cnaESCA14	A-443654 86	86	3	11	ESCA	0.158306	0.286084	0.28
NF1	A-443654 86	86	4	12	GBM	-0.0104925	0.111158	0.45
PTEN	A-443654 86	86	5	12	GBM	0.0561217	0.145517	0.35
TP53	A-443654 86	86	6	12	GBM	-0.00618412	0.113093	0.48875
gain:cnaGBM122	A-443654 86	86	3	12	GBM	0.0231513	0.125396	0.445
NF2	A-443654 86	86	3	11	KIRC	-0.0163905	0.132695	0.47625
TP53	A-443654 86	86	3	11	KIRC	0.00150729	0.110245	0.48125
VHL	A-443654 86	86	3	11	KIRC	0.0350064	0.126192	0.3825
loss:cnaKIRC3	A-443654 86	86	3	11	KIRC	0.00125713	0.115422	0.49
loss:cnaKIRC4	A-443654 86	86	3	11	KIRC	0.00170588	0.116767	0.4975
loss:cnaKIRC12	A-443654 86	86	4	11	KIRC	-0.0118451	0.109203	0.46375
loss:cnaKIRC13	A-443654 86	86	4	11	KIRC	-0.0192822	0.109459	0.475
loss:cnaKIRC14	A-443654 86	86	4	11	KIRC	-0.00880309	0.10212	0.4825
loss:cnaKIRC15	A-443654 86	86	4	11	KIRC	-0.0143932	0.118262	0.475
loss:cnaKIRC16	A-443654 86	86	3	11	KIRC	-0.00511432	0.106956	0.4875
loss:cnaKIRC19	A-443654 86	86	4	11	KIRC	0.00985284	0.121624	0.485
loss:cnaKIRC22	A-443654 86	86	3	11	KIRC	-0.00127021	0.116203	0.47875
loss:cnaKIRC24 (FAT1,IRF2)	A-443654 86	86	3	11	KIRC	5.00554e-07	0.113791	0.4775
ASXL1	A-443654 86	86	5	26	LAML	-0.0110241	0.0948539	0.45375
CREBBP	A-443654 86	86	3	26	LAML	0.0393856	0.124335	0.395
KRAS	A-443654 86	86	3	26	LAML	-0.00762531	0.107396	0.45375
NRAS	A-443654 86	86	7	26	LAML	0.108759	0.171684	0.25
SACS	A-443654 86	86	3	26	LAML	0.0290009	0.12245	0.405
TP53	A-443654 86	86	13	26	LAML	0.112309	0.158114	0.2275
NF1	A-443654 86	86	3	11	LGG	0.00273861	0.108025	0.4925
RB1	A-443654 86	86	5	11	LGG	-0.0281527	0.12067	0.4225
TP53	A-443654 86	86	8	11	LGG	-0.0517973	0.162436	0.39625
loss:cnaLGG1 (BNC2,CDKN2A,JAK2,PSIP1)	A-443654 86	86	5	11	LGG	0.0366157	0.12371	0.385
loss:cnaLGG7 (RPL22)	A-443654 86	86	3	11	LGG	0.0324099	0.143455	0.4325
loss:cnaLGG14 (CUL2)	A-443654 86	86	3	11	LGG	0.0193969	0.120644	0.45
KRAS	A-443654 86	86	4	13	LUAD	-0.0256256	0.11404	0.4225
STK11	A-443654 86	86	3	13	LUAD	0.0709135	0.173445	0.365
loss:cnaLUAD1 (CDKN2A)	A-443654 86	86	7	13	LUAD	0.00931379	0.10524	0.47875
gain:cnaLUAD27 (MYC)	A-443654 86	86	4	13	LUAD	-0.0153013	0.101577	0.4375
gain:cnaLUAD30 (CCND1)	A-443654 86	86	4	13	LUAD	-0.00582748	0.103131	0.46625
loss:cnaLUAD34 (FAT1,IRF2)	A-443654 86	86	3	13	LUAD	0.0680457	0.183036	0.3725
BRAF	A-443654 86	86	12	18	SKCM	0.000997672	0.104134	0.49
MECOM	A-443654 86	86	3	18	SKCM	0.0138484	0.125678	0.48
NRAS	A-443654 86	86	6	18	SKCM	0.00549871	0.107228	0.475
TP53	A-443654 86	86	3	18	SKCM	0.0290281	0.117635	0.445
loss:cnaSKCM3	A-443654 86	86	3	18	SKCM	0.0348705	0.133827	0.44875
loss:cnaSKCM4 (BNC2,CDKN2A,JAK2,PSIP1)	A-443654 86	86	12	18	SKCM	-0.0714138	0.152437	0.35125
gain:cnaSKCM12 (KRAS)	A-443654 86	86	4	18	SKCM	0.0221192	0.10666	0.42
loss:cnaSKCM27 (CASP1)	A-443654 86	86	3	18	SKCM	0.0196526	0.122604	0.47125
loss:cnaSKCM28	A-443654 86	86	3	18	SKCM	-0.0105031	0.101076	0.4675
PIK3CA	A-770041 55	55	4	12	BRCA	0.0178924	0.131996	0.4675
TP53	A-770041 55	55	9	12	BRCA	0.0339216	0.15129	0.42375
gain:cnaBRCA13 (FGFR1,WHSC1L1)	A-770041 55	55	3	12	BRCA	-0.0129727	0.130978	0.4475
gain:cnaBRCA14 (RAD21)	A-770041 55	55	6	12	BRCA	-0.0301235	0.144014	0.45
gain:cnaBRCA15	A-770041 55	55	6	12	BRCA	-0.0366017	0.153766	0.41875
gain:cnaBRCA16	A-770041 55	55	3	12	BRCA	-0.00715557	0.144771	0.4925
loss:cnaBRCA17	A-770041 55	55	3	12	BRCA	0.0260187	0.139064	0.465
loss:cnaBRCA18	A-770041 55	55	5	12	BRCA	0.0340073	0.145485	0.43
loss:cnaBRCA22 (SYNCRIP,ZNF292)	A-770041 55	55	3	12	BRCA	-0.0131739	0.137921	0.47125
gain:cnaBRCA26 (CDK12,ERBB2,MED24)	A-770041 55	55	3	12	BRCA	0.000333174	0.144791	0.485
gain:cnaBRCA27 (CLTC,PPM1D)	A-770041 55	55	3	12	BRCA	-0.0162592	0.135497	0.46625
gain:cnaBRCA31	A-770041 55	55	3	12	BRCA	-0.00120293	0.12686	0.4975
loss:cnaBRCA32 (PABPC3,SACS,ZMYM2)	A-770041 55	55	3	12	BRCA	0.0122208	0.132523	0.485
loss:cnaBRCA33	A-770041 55	55	4	12	BRCA	0.0237968	0.149325	0.46375
gain:cnaBRCA62	A-770041 55	55	4	12	BRCA	0.0207827	0.142267	0.43375
AKAP9	A-770041 55	55	3	15	COREAD	0.00184033	0.122069	0.49375
APC	A-770041 55	55	10	15	COREAD	-0.0163941	0.126193	0.46875
ARID1A	A-770041 55	55	5	15	COREAD	0.0173998	0.131498	0.47125
BPTF	A-770041 55	55	3	15	COREAD	0.00339488	0.122076	0.4925
BRAF	A-770041 55	55	5	15	COREAD	0.015676	0.118291	0.45875
CHD9	A-770041 55	55	3	15	COREAD	0.00874231	0.121223	0.48125
EP300	A-770041 55	55	4	15	COREAD	0.00785311	0.128982	0.4725
KRAS	A-770041 55	55	6	15	COREAD	0.0039732	0.12516	0.48
MGA	A-770041 55	55	3	15	COREAD	-0.0390409	0.157309	0.42125
NF1	A-770041 55	55	3	15	COREAD	-0.00153064	0.129971	0.4975
PTEN	A-770041 55	55	3	15	COREAD	0.0193748	0.131502	0.43375
RNF43	A-770041 55	55	5	15	COREAD	0.000596223	0.153561	0.49125
TP53	A-770041 55	55	11	15	COREAD	-0.00967826	0.121264	0.4725
loss:cnaCOREAD11	A-770041 55	55	3	15	COREAD	-0.0170476	0.120855	0.46875
loss:cnaCOREAD19	A-770041 55	55	4	15	COREAD	-0.0126933	0.127327	0.44875
loss:cnaCOREAD24	A-770041 55	55	4	15	COREAD	0.0183244	0.13691	0.45375
gain:cnaCOREAD32 (STK4)	A-770041 55	55	3	15	COREAD	-0.0205844	0.134449	0.445
loss:cnaCOREAD33	A-770041 55	55	6	15	COREAD	0.00512746	0.110595	0.475
loss:cnaCOREAD38 (CDKN2A)	A-770041 55	55	4	15	COREAD	0.00931446	0.129457	0.4625
loss:cnaCOREAD49	A-770041 55	55	6	15	COREAD	0.0492713	0.166437	0.415
loss:cnaCOREAD54 (SMAD4)	A-770041 55	55	5	15	COREAD	0.000230401	0.12471	0.4925
loss:cnaCOREAD55	A-770041 55	55	5	15	COREAD	0.00142545	0.119829	0.48125
loss:cnaCOREAD56	A-770041 55	55	5	15	COREAD	-0.00503626	0.127867	0.5
loss:cnaCOREAD65	A-770041 55	55	9	15	COREAD	0.0234497	0.119114	0.41375
ARID1A	A-770041 55	55	3	25	DLBC	0.0357095	0.152975	0.42625
CREBBP	A-770041 55	55	6	25	DLBC	-0.0297385	0.130938	0.45
EP300	A-770041 55	55	5	25	DLBC	-0.023692	0.129872	0.45
MLL2	A-770041 55	55	8	25	DLBC	-0.00871743	0.111782	0.45625
PTEN	A-770041 55	55	4	25	DLBC	0.0535964	0.162728	0.39375
TP53	A-770041 55	55	15	25	DLBC	-0.0636368	0.172045	0.38
loss:cnaDLBC2	A-770041 55	55	4	25	DLBC	0.0528182	0.161286	0.39125
loss:cnaDLBC4 (CDKN2A)	A-770041 55	55	8	25	DLBC	0.0174697	0.12077	0.43625
NOTCH1	A-770041 55	55	3	11	ESCA	-0.026758	0.128994	0.44375
gain:cnaESCA11 (CCND1,CTTN)	A-770041 55	55	7	11	ESCA	0.0208943	0.124158	0.45375
loss:cnaESCA14	A-770041 55	55	3	11	ESCA	0.102498	0.245087	0.3425
NF1	A-770041 55	55	4	12	GBM	-0.0130122	0.118121	0.45125
PTEN	A-770041 55	55	5	12	GBM	0.101386	0.239961	0.3375
TP53	A-770041 55	55	6	12	GBM	-0.00953161	0.120993	0.475
gain:cnaGBM122	A-770041 55	55	3	12	GBM	-0.000383035	0.121903	0.4925
NF2	A-770041 55	55	3	11	KIRC	-0.02672	0.130899	0.4275
TP53	A-770041 55	55	3	11	KIRC	0.00829649	0.1173	0.47375
VHL	A-770041 55	55	3	11	KIRC	0.0349183	0.147639	0.42375
loss:cnaKIRC3	A-770041 55	55	3	11	KIRC	0.0325367	0.144311	0.44125
loss:cnaKIRC4	A-770041 55	55	3	11	KIRC	0.028997	0.145215	0.445
loss:cnaKIRC12	A-770041 55	55	4	11	KIRC	-0.00364984	0.112425	0.49375
loss:cnaKIRC13	A-770041 55	55	4	11	KIRC	-0.00647463	0.1193	0.48625
loss:cnaKIRC14	A-770041 55	55	4	11	KIRC	-0.00289626	0.119563	0.485
loss:cnaKIRC15	A-770041 55	55	4	11	KIRC	-0.00450229	0.121951	0.475
loss:cnaKIRC16	A-770041 55	55	3	11	KIRC	-0.020034	0.115519	0.4475
loss:cnaKIRC19	A-770041 55	55	4	11	KIRC	-0.00953472	0.114879	0.475
loss:cnaKIRC22	A-770041 55	55	3	11	KIRC	0.0293057	0.141753	0.42875
loss:cnaKIRC24 (FAT1,IRF2)	A-770041 55	55	3	11	KIRC	0.00644899	0.11133	0.485
ASXL1	A-770041 55	55	5	26	LAML	0.0361077	0.158565	0.4225
CREBBP	A-770041 55	55	3	26	LAML	0.0180931	0.140503	0.445
KRAS	A-770041 55	55	3	26	LAML	0.0170304	0.13384	0.4475
NRAS	A-770041 55	55	7	26	LAML	0.00759636	0.125562	0.49
SACS	A-770041 55	55	3	26	LAML	-0.0253453	0.154241	0.45125
TP53	A-770041 55	55	13	26	LAML	0.0735807	0.186014	0.36625
NF1	A-770041 55	55	3	11	LGG	0.00765576	0.125285	0.4725
RB1	A-770041 55	55	5	11	LGG	-0.0276634	0.135668	0.45625
TP53	A-770041 55	55	8	11	LGG	-0.0095497	0.139065	0.49875
loss:cnaLGG1 (BNC2,CDKN2A,JAK2,PSIP1)	A-770041 55	55	5	11	LGG	-0.00869353	0.12288	0.47
loss:cnaLGG7 (RPL22)	A-770041 55	55	3	11	LGG	0.0723998	0.202454	0.3775
loss:cnaLGG14 (CUL2)	A-770041 55	55	3	11	LGG	0.00248081	0.114964	0.49625
KRAS	A-770041 55	55	4	13	LUAD	0.0112516	0.125925	0.46875
STK11	A-770041 55	55	3	13	LUAD	0.0470905	0.177081	0.41875
loss:cnaLUAD1 (CDKN2A)	A-770041 55	55	7	13	LUAD	-0.00300514	0.114702	0.4825
gain:cnaLUAD27 (MYC)	A-770041 55	55	4	13	LUAD	-0.0183926	0.115877	0.4425
gain:cnaLUAD30 (CCND1)	A-770041 55	55	4	13	LUAD	-0.0161545	0.128534	0.47375
loss:cnaLUAD34 (FAT1,IRF2)	A-770041 55	55	3	13	LUAD	0.0519373	0.183891	0.4325
BRAF	A-770041 55	55	12	18	SKCM	-0.0383611	0.143436	0.4275
MECOM	A-770041 55	55	3	18	SKCM	-0.0128063	0.140159	0.46625
NRAS	A-770041 55	55	6	18	SKCM	0.0303371	0.143762	0.4375
TP53	A-770041 55	55	3	18	SKCM	-0.0155195	0.1194	0.44875
loss:cnaSKCM3	A-770041 55	55	3	18	SKCM	0.00531725	0.122868	0.48375
loss:cnaSKCM4 (BNC2,CDKN2A,JAK2,PSIP1)	A-770041 55	55	12	18	SKCM	0.0100051	0.120546	0.4925
gain:cnaSKCM12 (KRAS)	A-770041 55	55	4	18	SKCM	-0.0260014	0.146459	0.4525
loss:cnaSKCM27 (CASP1)	A-770041 55	55	3	18	SKCM	0.0158947	0.130688	0.4525
loss:cnaSKCM28	A-770041 55	55	3	18	SKCM	0.0251223	0.144158	0.45375
ARID1A	AC220 254	254	5	19	BLCA	0.0023183	0.126672	0.4675
CDKN1A	AC220 254	254	3	19	BLCA	0.0139722	0.137301	0.4775
EP300	AC220 254	254	4	19	BLCA	0.0135695	0.133696	0.48125
MLL2	AC220 254	254	3	19	BLCA	0.0186618	0.150036	0.48375
NRAS	AC220 254	254	3	19	BLCA	0.0147654	0.135185	0.45
RB1	AC220 254	254	6	19	BLCA	0.021219	0.134409	0.4575
TP53	AC220 254	254	15	19	BLCA	-0.00236451	0.115944	0.485
loss:cnaBLCA5 (FAT1,IRF2)	AC220 254	254	5	19	BLCA	0.00273383	0.134741	0.48625
gain:cnaBLCA9	AC220 254	254	4	19	BLCA	0.00970634	0.136809	0.47625
gain:cnaBLCA15 (ASXL1)	AC220 254	254	6	19	BLCA	0.0242435	0.129154	0.455
loss:cnaBLCA18 (CHD9,CNOT1,CYLD,MMP2,NUP93)	AC220 254	254	3	19	BLCA	0.0082665	0.146431	0.4675
gain:cnaBLCA23 (MYC)	AC220 254	254	4	19	BLCA	-0.012486	0.138279	0.48375
ARID1A	AC220 254	254	5	48	BRCA	0.0011568	0.115594	0.4925
ASH1L	AC220 254	254	3	48	BRCA	-0.0002751	0.116149	0.495
BRCA1	AC220 254	254	4	48	BRCA	0.0163895	0.125394	0.44875
BRCA2	AC220 254	254	6	48	BRCA	0.00217291	0.119043	0.48375
CDH1	AC220 254	254	4	48	BRCA	0.00168147	0.122285	0.4875
NF1	AC220 254	254	4	48	BRCA	-0.00180836	0.110301	0.49875
PIK3CA	AC220 254	254	16	48	BRCA	-0.0108847	0.104307	0.4825
POLR2B	AC220 254	254	3	48	BRCA	0.00308796	0.119254	0.49
PTEN	AC220 254	254	9	48	BRCA	0.0100838	0.115996	0.4575
TP53	AC220 254	254	37	48	BRCA	0.00528261	0.114405	0.45375
gain:cnaBRCA5 (GATA3,KLF6,LARP4B,VIM)	AC220 254	254	6	48	BRCA	0.0053449	0.12227	0.47
loss:cnaBRCA7 (FAS,PTEN)	AC220 254	254	4	48	BRCA	0.00410118	0.12992	0.47875
gain:cnaBRCA8 (CHD4,WNK1)	AC220 254	254	4	48	BRCA	-0.0252276	0.146457	0.445
gain:cnaBRCA9 (KRAS)	AC220 254	254	4	48	BRCA	0.00206694	0.122922	0.48625
gain:cnaBRCA10 (MDM2,NUP107)	AC220 254	254	5	48	BRCA	-0.0115108	0.131009	0.48875
gain:cnaBRCA12 (TERT)	AC220 254	254	9	48	BRCA	0.0283781	0.137174	0.42875
gain:cnaBRCA13 (FGFR1,WHSC1L1)	AC220 254	254	11	48	BRCA	0.000738466	0.113732	0.47125
gain:cnaBRCA14 (RAD21)	AC220 254	254	21	48	BRCA	-0.0470805	0.135863	0.37625
gain:cnaBRCA15	AC220 254	254	22	48	BRCA	-0.00236422	0.112041	0.48875
gain:cnaBRCA16	AC220 254	254	16	48	BRCA	0.00498163	0.100429	0.47125
loss:cnaBRCA17	AC220 254	254	10	48	BRCA	-0.0517835	0.143626	0.37875
loss:cnaBRCA18	AC220 254	254	15	48	BRCA	-0.0551621	0.138756	0.3575
gain:cnaBRCA19	AC220 254	254	4	48	BRCA	-0.00903786	0.119085	0.47375
loss:cnaBRCA20	AC220 254	254	3	48	BRCA	-0.0110884	0.124251	0.43875
loss:cnaBRCA22 (SYNCRIP,ZNF292)	AC220 254	254	18	48	BRCA	0.0124645	0.108719	0.4825
loss:cnaBRCA25 (ARID1B,MAP3K4,MLLT4)	AC220 254	254	5	48	BRCA	-0.00777712	0.142024	0.455
gain:cnaBRCA26 (CDK12,ERBB2,MED24)	AC220 254	254	14	48	BRCA	-0.00880937	0.118041	0.47875
gain:cnaBRCA27 (CLTC,PPM1D)	AC220 254	254	9	48	BRCA	0.00631793	0.117495	0.49375
loss:cnaBRCA28 (GPS2)	AC220 254	254	4	48	BRCA	0.00754985	0.114716	0.49
loss:cnaBRCA29 (MAP2K4)	AC220 254	254	7	48	BRCA	0.00839121	0.122378	0.47
gain:cnaBRCA30 (CRNKL1,FOXA2)	AC220 254	254	5	48	BRCA	-0.00408327	0.124313	0.49125
gain:cnaBRCA31	AC220 254	254	16	48	BRCA	-0.0112475	0.119435	0.47375
loss:cnaBRCA32 (PABPC3,SACS,ZMYM2)	AC220 254	254	9	48	BRCA	0.0113901	0.114846	0.455
loss:cnaBRCA33	AC220 254	254	6	48	BRCA	-0.0603402	0.168515	0.3875
loss:cnaBRCA34	AC220 254	254	5	48	BRCA	0.00109102	0.128058	0.5
loss:cnaBRCA36 (FAT1,IRF2)	AC220 254	254	9	48	BRCA	0.010694	0.117361	0.47875
loss:cnaBRCA38	AC220 254	254	4	48	BRCA	0.00386007	0.130128	0.4825
gain:cnaBRCA39 (FOXA1,NKX2-1,PSMA6)	AC220 254	254	7	48	BRCA	-0.0127564	0.123604	0.48
loss:cnaBRCA42	AC220 254	254	3	48	BRCA	0.0042781	0.129073	0.49875
gain:cnaBRCA47 (EGFR)	AC220 254	254	7	48	BRCA	0.0156582	0.115102	0.48125
gain:cnaBRCA48	AC220 254	254	5	48	BRCA	0.0327823	0.136658	0.40625
loss:cnaBRCA57	AC220 254	254	5	48	BRCA	0.012785	0.117098	0.48
gain:cnaBRCA58 (CCND1)	AC220 254	254	10	48	BRCA	0.029631	0.133703	0.41625
loss:cnaBRCA60	AC220 254	254	3	48	BRCA	-0.00202991	0.141766	0.49375
gain:cnaBRCA61 (NOTCH2)	AC220 254	254	3	48	BRCA	-0.00359572	0.134749	0.5
gain:cnaBRCA62	AC220 254	254	10	48	BRCA	0.00619184	0.120308	0.49375
gain:cnaBRCA63	AC220 254	254	7	48	BRCA	0.00186255	0.110011	0.4725
gain:cnaBRCA64 (SDHC)	AC220 254	254	8	48	BRCA	-0.00112697	0.128508	0.4825
AKAP9	AC220 254	254	8	46	COREAD	0.00693289	0.113431	0.4675
APC	AC220 254	254	34	46	COREAD	0.027517	0.11985	0.41125
ARID1A	AC220 254	254	11	46	COREAD	-0.00328389	0.11341	0.49625
ARID1B	AC220 254	254	3	46	COREAD	-0.00311549	0.118306	0.48875
ARID2	AC220 254	254	7	46	COREAD	-0.00859139	0.106499	0.455
ASPM	AC220 254	254	6	46	COREAD	-0.0130812	0.123417	0.46375
ASXL2	AC220 254	254	4	46	COREAD	0.00495125	0.129618	0.49625
ATM	AC220 254	254	4	46	COREAD	0.0235927	0.138483	0.42375
ATRX	AC220 254	254	3	46	COREAD	-0.0171314	0.140214	0.47625
B2M	AC220 254	254	9	46	COREAD	-0.00593212	0.114421	0.47875
BCOR	AC220 254	254	5	46	COREAD	0.0146195	0.13086	0.455
BMPR2	AC220 254	254	13	46	COREAD	-0.00644805	0.11719	0.49
BPTF	AC220 254	254	5	46	COREAD	0.00165662	0.122733	0.4925
BRAF	AC220 254	254	10	46	COREAD	0.0182658	0.111483	0.44875
BRWD1	AC220 254	254	3	46	COREAD	0.000139865	0.123517	0.47625
CDH1	AC220 254	254	3	46	COREAD	-0.00315423	0.11674	0.49
CDK12	AC220 254	254	3	46	COREAD	-0.00758243	0.141097	0.4825
CEP290	AC220 254	254	6	46	COREAD	-0.00968694	0.113694	0.46875
CHD4	AC220 254	254	3	46	COREAD	0.016457	0.15214	0.4675
CHD9	AC220 254	254	10	46	COREAD	0.013253	0.118014	0.49375
CLSPN	AC220 254	254	3	46	COREAD	0.00183821	0.122953	0.49
CNOT1	AC220 254	254	3	46	COREAD	-0.00896718	0.154204	0.4975
CREBBP	AC220 254	254	5	46	COREAD	-0.000297095	0.129169	0.49625
CTCF	AC220 254	254	8	46	COREAD	0.00832887	0.120172	0.47875
CTNNB1	AC220 254	254	6	46	COREAD	-0.0166256	0.122696	0.46375
DNMT3A	AC220 254	254	3	46	COREAD	0.0196385	0.130946	0.45875
EGFR	AC220 254	254	4	46	COREAD	-0.00489523	0.129589	0.49375
ELF3	AC220 254	254	4	46	COREAD	0.00127136	0.138998	0.49625
EP300	AC220 254	254	15	46	COREAD	0.00502049	0.123722	0.48
FAM123B	AC220 254	254	3	46	COREAD	-0.001327	0.127065	0.4875
FBXW7	AC220 254	254	15	46	COREAD	-8.32233e-05	0.113712	0.495
GNAS	AC220 254	254	3	46	COREAD	-0.0541009	0.185433	0.4025
ITSN1	AC220 254	254	3	46	COREAD	0.00991296	0.127635	0.4525
KDM6A	AC220 254	254	3	46	COREAD	0.013642	0.134142	0.45875
KRAS	AC220 254	254	26	46	COREAD	-0.0118068	0.119171	0.45125
LARP4B	AC220 254	254	5	46	COREAD	-0.00129761	0.116572	0.49625
LPHN2	AC220 254	254	4	46	COREAD	0.0187204	0.152608	0.4825
MAP2K4	AC220 254	254	5	46	COREAD	0.00609766	0.128094	0.49375
MAP3K4	AC220 254	254	3	46	COREAD	0.0090507	0.137827	0.48
MECOM	AC220 254	254	5	46	COREAD	-0.00631527	0.129375	0.48875
MGA	AC220 254	254	6	46	COREAD	-0.00699775	0.125129	0.47875
MLL2	AC220 254	254	15	46	COREAD	-0.0269964	0.117701	0.42625
NCOR1	AC220 254	254	7	46	COREAD	0.0180354	0.115367	0.475
NF1	AC220 254	254	7	46	COREAD	-0.0240926	0.132446	0.4375
NR4A2	AC220 254	254	5	46	COREAD	-0.0138763	0.138498	0.4725
NUP98	AC220 254	254	4	46	COREAD	-0.00228864	0.146019	0.4675
PBRM1	AC220 254	254	5	46	COREAD	-0.0297922	0.1382	0.42375
PIK3CA	AC220 254	254	12	46	COREAD	-0.0490498	0.157234	0.39125
PIK3R1	AC220 254	254	6	46	COREAD	-0.0275239	0.140697	0.42125
POLR2B	AC220 254	254	3	46	COREAD	-0.0118943	0.145403	0.45875
PTEN	AC220 254	254	6	46	COREAD	-0.00697255	0.119573	0.47625
RNF43	AC220 254	254	10	46	COREAD	-0.0112728	0.108913	0.4625
SACS	AC220 254	254	10	46	COREAD	-0.0265525	0.124107	0.44125
SMAD2	AC220 254	254	3	46	COREAD	-0.0276372	0.144856	0.44125
SMAD4	AC220 254	254	9	46	COREAD	-0.00816447	0.1253	0.4575
SMARCA4	AC220 254	254	5	46	COREAD	-0.0224614	0.135474	0.45125
SOS2	AC220 254	254	5	46	COREAD	0.0246852	0.147882	0.43375
SOX9	AC220 254	254	4	46	COREAD	-0.0133283	0.128727	0.49625
SRGAP3	AC220 254	254	3	46	COREAD	0.00582732	0.127001	0.4625
TCF7L2	AC220 254	254	3	46	COREAD	-0.037373	0.146808	0.44125
TP53	AC220 254	254	33	46	COREAD	0.00108569	0.114659	0.49875
TRIO	AC220 254	254	7	46	COREAD	0.00226545	0.116247	0.48875
loss:cnaCOREAD11	AC220 254	254	19	46	COREAD	0.0176039	0.116132	0.43375
loss:cnaCOREAD12 (PCDH18)	AC220 254	254	3	46	COREAD	0.0119788	0.116708	0.49125
loss:cnaCOREAD14	AC220 254	254	3	46	COREAD	0.0186615	0.138761	0.45625
loss:cnaCOREAD18	AC220 254	254	9	46	COREAD	0.0156846	0.12541	0.45875
loss:cnaCOREAD19	AC220 254	254	18	46	COREAD	0.0323911	0.141648	0.405
loss:cnaCOREAD23	AC220 254	254	3	46	COREAD	0.017568	0.133376	0.4525
loss:cnaCOREAD24	AC220 254	254	10	46	COREAD	0.00531267	0.11238	0.4975
loss:cnaCOREAD27 (MAP2K4)	AC220 254	254	4	46	COREAD	0.00163821	0.134634	0.4875
loss:cnaCOREAD28 (SOX9)	AC220 254	254	3	46	COREAD	0.0151355	0.14785	0.4825
gain:cnaCOREAD31	AC220 254	254	4	46	COREAD	0.00592367	0.131534	0.49625
gain:cnaCOREAD32 (STK4)	AC220 254	254	5	46	COREAD	0.00760175	0.123598	0.47375
loss:cnaCOREAD33	AC220 254	254	20	46	COREAD	0.00115965	0.108665	0.4925
gain:cnaCOREAD35 (FLT3,WASF3)	AC220 254	254	6	46	COREAD	0.0162326	0.135274	0.46
gain:cnaCOREAD36	AC220 254	254	3	46	COREAD	0.0242857	0.140645	0.465
gain:cnaCOREAD37 (ING1,IRS2,TFDP1)	AC220 254	254	5	46	COREAD	0.0162669	0.108946	0.435
loss:cnaCOREAD38 (CDKN2A)	AC220 254	254	7	46	COREAD	0.0122062	0.109484	0.4425
loss:cnaCOREAD42 (B2M,BUB1B,MGA,TP53BP1)	AC220 254	254	3	46	COREAD	0.0240155	0.134821	0.45125
gain:cnaCOREAD47 (MYC)	AC220 254	254	6	46	COREAD	0.0224056	0.125017	0.46
loss:cnaCOREAD48	AC220 254	254	6	46	COREAD	0.00512838	0.115272	0.48125
loss:cnaCOREAD49	AC220 254	254	15	46	COREAD	0.0177126	0.127318	0.4525
loss:cnaCOREAD53 (ARFGAP3)	AC220 254	254	3	46	COREAD	0.0133246	0.149271	0.4525
loss:cnaCOREAD54 (SMAD4)	AC220 254	254	12	46	COREAD	-0.00627122	0.126402	0.47875
loss:cnaCOREAD55	AC220 254	254	12	46	COREAD	-0.015267	0.116917	0.4675
loss:cnaCOREAD56	AC220 254	254	12	46	COREAD	-0.0112813	0.117718	0.47
loss:cnaCOREAD63 (APC)	AC220 254	254	6	46	COREAD	0.0234161	0.138777	0.4425
loss:cnaCOREAD65	AC220 254	254	27	46	COREAD	0.0369532	0.134164	0.405
ARID1A	AC220 254	254	3	29	DLBC	0.00352615	0.138633	0.485
CREBBP	AC220 254	254	6	29	DLBC	-0.0071882	0.115986	0.49
EP300	AC220 254	254	6	29	DLBC	0.00450421	0.124065	0.48125
MLL2	AC220 254	254	9	29	DLBC	-0.0157202	0.130088	0.4475
PTEN	AC220 254	254	6	29	DLBC	0.0041603	0.124202	0.49375
TP53	AC220 254	254	17	29	DLBC	0.02524	0.129898	0.445
loss:cnaDLBC2	AC220 254	254	4	29	DLBC	-0.0076185	0.121199	0.49
loss:cnaDLBC4 (CDKN2A)	AC220 254	254	7	29	DLBC	0.000318138	0.12465	0.49375
EGFR	AC220 254	254	3	35	ESCA	0.0114043	0.141561	0.46875
EP300	AC220 254	254	3	35	ESCA	0.0113417	0.124079	0.46625
MLL2	AC220 254	254	3	35	ESCA	0.00444907	0.122147	0.48875
NFE2L2	AC220 254	254	3	35	ESCA	0.00573335	0.129144	0.4975
NOTCH1	AC220 254	254	4	35	ESCA	0.0063633	0.122589	0.46125
PIK3CA	AC220 254	254	5	35	ESCA	0.0229895	0.125564	0.435
SMAD4	AC220 254	254	4	35	ESCA	0.00661953	0.141978	0.49875
loss:cnaESCA1	AC220 254	254	6	35	ESCA	-0.0446791	0.150966	0.43125
gain:cnaESCA2 (KRAS)	AC220 254	254	3	35	ESCA	0.0140976	0.12857	0.4825
gain:cnaESCA3 (KRAS)	AC220 254	254	3	35	ESCA	0.0140337	0.133135	0.48
loss:cnaESCA5 (PAX5)	AC220 254	254	3	35	ESCA	-0.0968294	0.263459	0.3625
gain:cnaESCA7 (ERBB2)	AC220 254	254	10	35	ESCA	-0.00395235	0.118335	0.48
gain:cnaESCA9 (EGFR)	AC220 254	254	8	35	ESCA	0.00432158	0.11987	0.4825
gain:cnaESCA11 (CCND1,CTTN)	AC220 254	254	16	35	ESCA	0.0408327	0.132716	0.3825
loss:cnaESCA12	AC220 254	254	8	35	ESCA	-0.0631799	0.171012	0.34875
loss:cnaESCA14	AC220 254	254	10	35	ESCA	0.0171945	0.138698	0.48125
NF1	AC220 254	254	8	35	GBM	-0.0146236	0.114719	0.455
PTEN	AC220 254	254	18	35	GBM	0.00219939	0.0978821	0.47125
RB1	AC220 254	254	5	35	GBM	0.0100807	0.125433	0.45625
TP53	AC220 254	254	21	35	GBM	0.060181	0.168768	0.37375
loss:cnaGBM1	AC220 254	254	3	35	GBM	-0.0388893	0.170001	0.4325
loss:cnaGBM2 (CDKN2A)	AC220 254	254	26	35	GBM	-0.0255434	0.125016	0.43
loss:cnaGBM19 (FAT1,IRF2)	AC220 254	254	6	35	GBM	-0.00293978	0.131218	0.45625
gain:cnaGBM25 (CDK4)	AC220 254	254	4	35	GBM	0.00897483	0.142225	0.49125
loss:cnaGBM45	AC220 254	254	3	35	GBM	-0.0723641	0.185855	0.3575
loss:cnaGBM47	AC220 254	254	6	35	GBM	-0.0586692	0.166495	0.37
loss:cnaGBM68 (CDKN2C,FAF1)	AC220 254	254	6	35	GBM	0.00931356	0.115256	0.47625
gain:cnaGBM71 (SOX2)	AC220 254	254	3	35	GBM	0.00905453	0.137179	0.45
[truncated: 95,078 more rows]
