# Supplementary material for: A statistical framework for assessing pharmacological response and biomarkers using uncertainty estimates
Source: bioRxiv preprint, doi:10.1101/2020.05.01.072983, version 3 (2020-06-21)
Supplement: Supplementary Table 3 [file 072983_file05.xlsx]

## Sheet: GP_Supplementary_Table_S3
Table S3 - Raw and curve fitted replicate dataset.
Barcode	Date_Created	Scan_ID	Date_Scanned	Cell_ID	COSMIC_ID	Cell_Line_Name	Seeding_Density	Drugset_ID	Assay	Duration	Position	Tag	Drug_ID	Drug_Name	Concentration	Intensity
12508	21/01/2016 23:00	11914	25/01/2016 23:00	6231	906793	A375	150	231	Glo	4	1	UN-USED	NA	NA	NA	382
12508	21/01/2016 23:00	11914	25/01/2016 23:00	6231	906793	A375	150	231	Glo	4	2	UN-USED	NA	NA	NA	382
12508	21/01/2016 23:00	11914	25/01/2016 23:00	6231	906793	A375	150	231	Glo	4	3	UN-USED	NA	NA	NA	11849
12508	21/01/2016 23:00	11914	25/01/2016 23:00	6231	906793	A375	150	231	Glo	4	4	UN-USED	NA	NA	NA	14811
12508	21/01/2016 23:00	11914	25/01/2016 23:00	6231	906793	A375	150	231	Glo	4	5	UN-USED	NA	NA	NA	16531
12508	21/01/2016 23:00	11914	25/01/2016 23:00	6231	906793	A375	150	231	Glo	4	6	UN-USED	NA	NA	NA	15528
12508	21/01/2016 23:00	11914	25/01/2016 23:00	6231	906793	A375	150	231	Glo	4	7	UN-USED	NA	NA	NA	16531
12508	21/01/2016 23:00	11914	25/01/2016 23:00	6231	906793	A375	150	231	Glo	4	8	UN-USED	NA	NA	NA	14238
12508	21/01/2016 23:00	11914	25/01/2016 23:00	6231	906793	A375	150	231	Glo	4	9	UN-USED	NA	NA	NA	18442
12508	21/01/2016 23:00	11914	25/01/2016 23:00	6231	906793	A375	150	231	Glo	4	10	UN-USED	NA	NA	NA	16053
12508	21/01/2016 23:00	11914	25/01/2016 23:00	6231	906793	A375	150	231	Glo	4	11	UN-USED	NA	NA	NA	19780
12508	21/01/2016 23:00	11914	25/01/2016 23:00	6231	906793	A375	150	231	Glo	4	12	UN-USED	NA	NA	NA	16244
12508	21/01/2016 23:00	11914	25/01/2016 23:00	6231	906793	A375	150	231	Glo	4	13	UN-USED	NA	NA	NA	18156
12508	21/01/2016 23:00	11914	25/01/2016 23:00	6231	906793	A375	150	231	Glo	4	14	UN-USED	NA	NA	NA	17009
12508	21/01/2016 23:00	11914	25/01/2016 23:00	6231	906793	A375	150	231	Glo	4	15	UN-USED	NA	NA	NA	21883
12508	21/01/2016 23:00	11914	25/01/2016 23:00	6231	906793	A375	150	231	Glo	4	16	UN-USED	NA	NA	NA	19780
12508	21/01/2016 23:00	11914	25/01/2016 23:00	6231	906793	A375	150	231	Glo	4	17	UN-USED	NA	NA	NA	18920
12508	21/01/2016 23:00	11914	25/01/2016 23:00	6231	906793	A375	150	231	Glo	4	18	UN-USED	NA	NA	NA	17582
12508	21/01/2016 23:00	11914	25/01/2016 23:00	6231	906793	A375	150	231	Glo	4	19	UN-USED	NA	NA	NA	16244
12508	21/01/2016 23:00	11914	25/01/2016 23:00	6231	906793	A375	150	231	Glo	4	20	UN-USED	NA	NA	NA	20163
12508	21/01/2016 23:00	11914	25/01/2016 23:00	6231	906793	A375	150	231	Glo	4	21	UN-USED	NA	NA	NA	13951
12508	21/01/2016 23:00	11914	25/01/2016 23:00	6231	906793	A375	150	231	Glo	4	22	UN-USED	NA	NA	NA	16244
12508	21/01/2016 23:00	11914	25/01/2016 23:00	6231	906793	A375	150	231	Glo	4	23	UN-USED	NA	NA	NA	19016
12508	21/01/2016 23:00	11914	25/01/2016 23:00	6231	906793	A375	150	231	Glo	4	24	UN-USED	NA	NA	NA	16818
12508	21/01/2016 23:00	11914	25/01/2016 23:00	6231	906793	A375	150	231	Glo	4	25	UN-USED	NA	NA	NA	19876
12508	21/01/2016 23:00	11914	25/01/2016 23:00	6231	906793	A375	150	231	Glo	4	26	UN-USED	NA	NA	NA	16531
12508	21/01/2016 23:00	11914	25/01/2016 23:00	6231	906793	A375	150	231	Glo	4	27	UN-USED	NA	NA	NA	16722
12508	21/01/2016 23:00	11914	25/01/2016 23:00	6231	906793	A375	150	231	Glo	4	28	UN-USED	NA	NA	NA	16244
12508	21/01/2016 23:00	11914	25/01/2016 23:00	6231	906793	A375	150	231	Glo	4	29	UN-USED	NA	NA	NA	17487
12508	21/01/2016 23:00	11914	25/01/2016 23:00	6231	906793	A375	150	231	Glo	4	30	UN-USED	NA	NA	NA	17773
12508	21/01/2016 23:00	11914	25/01/2016 23:00	6231	906793	A375	150	231	Glo	4	31	UN-USED	NA	NA	NA	19111
12508	21/01/2016 23:00	11914	25/01/2016 23:00	6231	906793	A375	150	231	Glo	4	32	UN-USED	NA	NA	NA	14715
12508	21/01/2016 23:00	11914	25/01/2016 23:00	6231	906793	A375	150	231	Glo	4	33	UN-USED	NA	NA	NA	15862
12508	21/01/2016 23:00	11914	25/01/2016 23:00	6231	906793	A375	150	231	Glo	4	34	UN-USED	NA	NA	NA	16627
12508	21/01/2016 23:00	11914	25/01/2016 23:00	6231	906793	A375	150	231	Glo	4	35	UN-USED	NA	NA	NA	13473
12508	21/01/2016 23:00	11914	25/01/2016 23:00	6231	906793	A375	150	231	Glo	4	36	UN-USED	NA	NA	NA	18633
12508	21/01/2016 23:00	11914	25/01/2016 23:00	6231	906793	A375	150	231	Glo	4	37	UN-USED	NA	NA	NA	14906
12508	21/01/2016 23:00	11914	25/01/2016 23:00	6231	906793	A375	150	231	Glo	4	38	UN-USED	NA	NA	NA	15862
12508	21/01/2016 23:00	11914	25/01/2016 23:00	6231	906793	A375	150	231	Glo	4	39	UN-USED	NA	NA	NA	17773
12508	21/01/2016 23:00	11914	25/01/2016 23:00	6231	906793	A375	150	231	Glo	4	40	UN-USED	NA	NA	NA	17678
12508	21/01/2016 23:00	11914	25/01/2016 23:00	6231	906793	A375	150	231	Glo	4	41	UN-USED	NA	NA	NA	16627
12508	21/01/2016 23:00	11914	25/01/2016 23:00	6231	906793	A375	150	231	Glo	4	42	UN-USED	NA	NA	NA	16531
12508	21/01/2016 23:00	11914	25/01/2016 23:00	6231	906793	A375	150	231	Glo	4	43	UN-USED	NA	NA	NA	15480
12508	21/01/2016 23:00	11914	25/01/2016 23:00	6231	906793	A375	150	231	Glo	4	44	UN-USED	NA	NA	NA	13473
12508	21/01/2016 23:00	11914	25/01/2016 23:00	6231	906793	A375	150	231	Glo	4	45	UN-USED	NA	NA	NA	12231
12508	21/01/2016 23:00	11914	25/01/2016 23:00	6231	906793	A375	150	231	Glo	4	46	UN-USED	NA	NA	NA	10511
12508	21/01/2016 23:00	11914	25/01/2016 23:00	6231	906793	A375	150	231	Glo	4	47	UN-USED	NA	NA	NA	4682
12508	21/01/2016 23:00	11914	25/01/2016 23:00	6231	906793	A375	150	231	Glo	4	48	UN-USED	NA	NA	NA	299
12508	21/01/2016 23:00	11914	25/01/2016 23:00	6231	906793	A375	150	231	Glo	4	49	UN-USED	NA	NA	NA	100
12508	21/01/2016 23:00	11914	25/01/2016 23:00	6231	906793	A375	150	231	Glo	4	50	UN-USED	NA	NA	NA	18442
12508	21/01/2016 23:00	11914	25/01/2016 23:00	6231	906793	A375	150	231	Glo	4	51	UN-USED	NA	NA	NA	23699
12508	21/01/2016 23:00	11914	25/01/2016 23:00	6231	906793	A375	150	231	Glo	4	52	UN-USED	NA	NA	NA	24559
12508	21/01/2016 23:00	11914	25/01/2016 23:00	6231	906793	A375	150	231	Glo	4	53	UN-USED	NA	NA	NA	20258
12508	21/01/2016 23:00	11914	25/01/2016 23:00	6231	906793	A375	150	231	Glo	4	54	UN-USED	NA	NA	NA	19207
12508	21/01/2016 23:00	11914	25/01/2016 23:00	6231	906793	A375	150	231	Glo	4	55	UN-USED	NA	NA	NA	21883
12508	21/01/2016 23:00	11914	25/01/2016 23:00	6231	906793	A375	150	231	Glo	4	56	UN-USED	NA	NA	NA	22552
12508	21/01/2016 23:00	11914	25/01/2016 23:00	6231	906793	A375	150	231	Glo	4	57	UN-USED	NA	NA	NA	19211
12508	21/01/2016 23:00	11914	25/01/2016 23:00	6231	906793	A375	150	231	Glo	4	58	UN-USED	NA	NA	NA	21600
12508	21/01/2016 23:00	11914	25/01/2016 23:00	6231	906793	A375	150	231	Glo	4	59	UN-USED	NA	NA	NA	23221
12508	21/01/2016 23:00	11914	25/01/2016 23:00	6231	906793	A375	150	231	Glo	4	60	UN-USED	NA	NA	NA	19685
12508	21/01/2016 23:00	11914	25/01/2016 23:00	6231	906793	A375	150	231	Glo	4	61	UN-USED	NA	NA	NA	21309
12508	21/01/2016 23:00	11914	25/01/2016 23:00	6231	906793	A375	150	231	Glo	4	62	UN-USED	NA	NA	NA	21023
12508	21/01/2016 23:00	11914	25/01/2016 23:00	6231	906793	A375	150	231	Glo	4	63	UN-USED	NA	NA	NA	21978
12508	21/01/2016 23:00	11914	25/01/2016 23:00	6231	906793	A375	150	231	Glo	4	64	UN-USED	NA	NA	NA	20354
12508	21/01/2016 23:00	11914	25/01/2016 23:00	6231	906793	A375	150	231	Glo	4	65	UN-USED	NA	NA	NA	23030
12508	21/01/2016 23:00	11914	25/01/2016 23:00	6231	906793	A375	150	231	Glo	4	66	UN-USED	NA	NA	NA	21405
12508	21/01/2016 23:00	11914	25/01/2016 23:00	6231	906793	A375	150	231	Glo	4	67	UN-USED	NA	NA	NA	22934
12508	21/01/2016 23:00	11914	25/01/2016 23:00	6231	906793	A375	150	231	Glo	4	68	UN-USED	NA	NA	NA	21787
12508	21/01/2016 23:00	11914	25/01/2016 23:00	6231	906793	A375	150	231	Glo	4	69	UN-USED	NA	NA	NA	23699
12508	21/01/2016 23:00	11914	25/01/2016 23:00	6231	906793	A375	150	231	Glo	4	70	UN-USED	NA	NA	NA	22074
12508	21/01/2016 23:00	11914	25/01/2016 23:00	6231	906793	A375	150	231	Glo	4	71	UN-USED	NA	NA	NA	20640
12508	21/01/2016 23:00	11914	25/01/2016 23:00	6231	906793	A375	150	231	Glo	4	72	UN-USED	NA	NA	NA	23125
12508	21/01/2016 23:00	11914	25/01/2016 23:00	6231	906793	A375	150	231	Glo	4	73	UN-USED	NA	NA	NA	18251
12508	21/01/2016 23:00	11914	25/01/2016 23:00	6231	906793	A375	150	231	Glo	4	74	UN-USED	NA	NA	NA	24368
12508	21/01/2016 23:00	11914	25/01/2016 23:00	6231	906793	A375	150	231	Glo	4	75	UN-USED	NA	NA	NA	23412
12508	21/01/2016 23:00	11914	25/01/2016 23:00	6231	906793	A375	150	231	Glo	4	76	UN-USED	NA	NA	NA	22552
12508	21/01/2016 23:00	11914	25/01/2016 23:00	6231	906793	A375	150	231	Glo	4	77	UN-USED	NA	NA	NA	19398
12508	21/01/2016 23:00	11914	25/01/2016 23:00	6231	906793	A375	150	231	Glo	4	78	UN-USED	NA	NA	NA	23507
12508	21/01/2016 23:00	11914	25/01/2016 23:00	6231	906793	A375	150	231	Glo	4	79	UN-USED	NA	NA	NA	21214
12508	21/01/2016 23:00	11914	25/01/2016 23:00	6231	906793	A375	150	231	Glo	4	80	UN-USED	NA	NA	NA	22265
12508	21/01/2016 23:00	11914	25/01/2016 23:00	6231	906793	A375	150	231	Glo	4	81	UN-USED	NA	NA	NA	21596
12508	21/01/2016 23:00	11914	25/01/2016 23:00	6231	906793	A375	150	231	Glo	4	82	UN-USED	NA	NA	NA	20545
12508	21/01/2016 23:00	11914	25/01/2016 23:00	6231	906793	A375	150	231	Glo	4	83	UN-USED	NA	NA	NA	21500
12508	21/01/2016 23:00	11914	25/01/2016 23:00	6231	906793	A375	150	231	Glo	4	84	UN-USED	NA	NA	NA	21692
12508	21/01/2016 23:00	11914	25/01/2016 23:00	6231	906793	A375	150	231	Glo	4	85	UN-USED	NA	NA	NA	20927
12508	21/01/2016 23:00	11914	25/01/2016 23:00	6231	906793	A375	150	231	Glo	4	86	UN-USED	NA	NA	NA	20007
12508	21/01/2016 23:00	11914	25/01/2016 23:00	6231	906793	A375	150	231	Glo	4	87	UN-USED	NA	NA	NA	22838
12508	21/01/2016 23:00	11914	25/01/2016 23:00	6231	906793	A375	150	231	Glo	4	88	UN-USED	NA	NA	NA	18920
12508	21/01/2016 23:00	11914	25/01/2016 23:00	6231	906793	A375	150	231	Glo	4	89	UN-USED	NA	NA	NA	21500
12508	21/01/2016 23:00	11914	25/01/2016 23:00	6231	906793	A375	150	231	Glo	4	90	UN-USED	NA	NA	NA	20736
12508	21/01/2016 23:00	11914	25/01/2016 23:00	6231	906793	A375	150	231	Glo	4	91	UN-USED	NA	NA	NA	22074
12508	21/01/2016 23:00	11914	25/01/2016 23:00	6231	906793	A375	150	231	Glo	4	92	UN-USED	NA	NA	NA	21883
12508	21/01/2016 23:00	11914	25/01/2016 23:00	6231	906793	A375	150	231	Glo	4	93	UN-USED	NA	NA	NA	21405
12508	21/01/2016 23:00	11914	25/01/2016 23:00	6231	906793	A375	150	231	Glo	4	94	UN-USED	NA	NA	NA	23890
12508	21/01/2016 23:00	11914	25/01/2016 23:00	6231	906793	A375	150	231	Glo	4	95	UN-USED	NA	NA	NA	17773
12508	21/01/2016 23:00	11914	25/01/2016 23:00	6231	906793	A375	150	231	Glo	4	96	UN-USED	NA	NA	NA	6688
12508	21/01/2016 23:00	11914	25/01/2016 23:00	6231	906793	A375	150	231	Glo	4	97	B	NA	NA	NA	191
12508	21/01/2016 23:00	11914	25/01/2016 23:00	6231	906793	A375	150	231	Glo	4	98	UN-USED	NA	NA	NA	18920
12508	21/01/2016 23:00	11914	25/01/2016 23:00	6231	906793	A375	150	231	Glo	4	99	NC-1	4000	DMSO	NA	21692
12508	21/01/2016 23:00	11914	25/01/2016 23:00	6231	906793	A375	150	231	Glo	4	100	NC-1	4000	DMSO	NA	21405
12508	21/01/2016 23:00	11914	25/01/2016 23:00	6231	906793	A375	150	231	Glo	4	101	PC2-D1-S	1034	Staurosporine	2	1147
12508	21/01/2016 23:00	11914	25/01/2016 23:00	6231	906793	A375	150	231	Glo	4	102	PC1-D1-S	1862	MG-132	4	478
12508	21/01/2016 23:00	11914	25/01/2016 23:00	6231	906793	A375	150	231	Glo	4	103	NC-1	4000	DMSO	NA	20736
12508	21/01/2016 23:00	11914	25/01/2016 23:00	6231	906793	A375	150	231	Glo	4	104	NC-1	4000	DMSO	NA	19685
12508	21/01/2016 23:00	11914	25/01/2016 23:00	6231	906793	A375	150	231	Glo	4	105	NC-1	4000	DMSO	NA	22169
12508	21/01/2016 23:00	11914	25/01/2016 23:00	6231	906793	A375	150	231	Glo	4	113	NC-1	4000	DMSO	NA	22456
12508	21/01/2016 23:00	11914	25/01/2016 23:00	6231	906793	A375	150	231	Glo	4	121	NC-1	4000	DMSO	NA	20163
12508	21/01/2016 23:00	11914	25/01/2016 23:00	6231	906793	A375	150	231	Glo	4	136	NC-1	4000	DMSO	NA	19111
12508	21/01/2016 23:00	11914	25/01/2016 23:00	6231	906793	A375	150	231	Glo	4	137	PC1-D1-S	1862	MG-132	4	2675
12508	21/01/2016 23:00	11914	25/01/2016 23:00	6231	906793	A375	150	231	Glo	4	138	PC2-D1-S	1034	Staurosporine	2	1147
12508	21/01/2016 23:00	11914	25/01/2016 23:00	6231	906793	A375	150	231	Glo	4	139	NC-1	4000	DMSO	NA	20545
12508	21/01/2016 23:00	11914	25/01/2016 23:00	6231	906793	A375	150	231	Glo	4	140	NC-1	4000	DMSO	NA	20163
12508	21/01/2016 23:00	11914	25/01/2016 23:00	6231	906793	A375	150	231	Glo	4	141	NC-1	4000	DMSO	NA	19589
12508	21/01/2016 23:00	11914	25/01/2016 23:00	6231	906793	A375	150	231	Glo	4	142	NC-1	4000	DMSO	NA	19494
12508	21/01/2016 23:00	11914	25/01/2016 23:00	6231	906793	A375	150	231	Glo	4	143	UN-USED	NA	NA	NA	19685
12508	21/01/2016 23:00	11914	25/01/2016 23:00	6231	906793	A375	150	231	Glo	4	144	UN-USED	NA	NA	NA	11180
12508	21/01/2016 23:00	11914	25/01/2016 23:00	6231	906793	A375	150	231	Glo	4	145	B	NA	NA	NA	96
12508	21/01/2016 23:00	11914	25/01/2016 23:00	6231	906793	A375	150	231	Glo	4	146	UN-USED	NA	NA	NA	20449
12508	21/01/2016 23:00	11914	25/01/2016 23:00	6231	906793	A375	150	231	Glo	4	147	L1-D1-S	1003	Camptothecin	0.1	2962
12508	21/01/2016 23:00	11914	25/01/2016 23:00	6231	906793	A375	150	231	Glo	4	148	L1-D2-S	1003	Camptothecin	0.0316256	4300
12508	21/01/2016 23:00	11914	25/01/2016 23:00	6231	906793	A375	150	231	Glo	4	149	L1-D3-S	1003	Camptothecin	0.0100018	6880
12508	21/01/2016 23:00	11914	25/01/2016 23:00	6231	906793	A375	150	231	Glo	4	150	L1-D4-S	1003	Camptothecin	0.00316311	13377
12508	21/01/2016 23:00	11914	25/01/2016 23:00	6231	906793	A375	150	231	Glo	4	151	L1-D5-S	1003	Camptothecin	0.00100035	21692
12508	21/01/2016 23:00	11914	25/01/2016 23:00	6231	906793	A375	150	231	Glo	4	152	L1-D6-S	1003	Camptothecin	0.000316367	21405
12508	21/01/2016 23:00	11914	25/01/2016 23:00	6231	906793	A375	150	231	Glo	4	153	L1-D7-S	1003	Camptothecin	0.000100053	18538
12508	21/01/2016 23:00	11914	25/01/2016 23:00	6231	906793	A375	150	231	Glo	4	161	NC-1	4000	DMSO	NA	19398
12508	21/01/2016 23:00	11914	25/01/2016 23:00	6231	906793	A375	150	231	Glo	4	169	PC1-D1-S	1862	MG-132	4	2102
12508	21/01/2016 23:00	11914	25/01/2016 23:00	6231	906793	A375	150	231	Glo	4	170	NC-1	4000	DMSO	NA	19494
12508	21/01/2016 23:00	11914	25/01/2016 23:00	6231	906793	A375	150	231	Glo	4	171	NC-1	4000	DMSO	NA	18825
12508	21/01/2016 23:00	11914	25/01/2016 23:00	6231	906793	A375	150	231	Glo	4	172	NC-1	4000	DMSO	NA	19207
12508	21/01/2016 23:00	11914	25/01/2016 23:00	6231	906793	A375	150	231	Glo	4	173	PC2-D1-S	1034	Staurosporine	2	1624
12508	21/01/2016 23:00	11914	25/01/2016 23:00	6231	906793	A375	150	231	Glo	4	174	PC1-D1-S	1862	MG-132	4	1624
12508	21/01/2016 23:00	11914	25/01/2016 23:00	6231	906793	A375	150	231	Glo	4	175	NC-1	4000	DMSO	NA	17582
12508	21/01/2016 23:00	11914	25/01/2016 23:00	6231	906793	A375	150	231	Glo	4	176	NC-1	4000	DMSO	NA	20545
12508	21/01/2016 23:00	11914	25/01/2016 23:00	6231	906793	A375	150	231	Glo	4	191	UN-USED	NA	NA	NA	19398
12508	21/01/2016 23:00	11914	25/01/2016 23:00	6231	906793	A375	150	231	Glo	4	192	UN-USED	NA	NA	NA	16053
12508	21/01/2016 23:00	11914	25/01/2016 23:00	6231	906793	A375	150	231	Glo	4	193	B	NA	NA	NA	96
12508	21/01/2016 23:00	11914	25/01/2016 23:00	6231	906793	A375	150	231	Glo	4	194	UN-USED	NA	NA	NA	22743
12508	21/01/2016 23:00	11914	25/01/2016 23:00	6231	906793	A375	150	231	Glo	4	195	L2-D1-S	1004	Vinblastine	0.1	5542
12508	21/01/2016 23:00	11914	25/01/2016 23:00	6231	906793	A375	150	231	Glo	4	196	L2-D2-S	1004	Vinblastine	0.0316256	5255
12508	21/01/2016 23:00	11914	25/01/2016 23:00	6231	906793	A375	150	231	Glo	4	197	L2-D3-S	1004	Vinblastine	0.0100018	7262
12508	21/01/2016 23:00	11914	25/01/2016 23:00	6231	906793	A375	150	231	Glo	4	198	L2-D4-S	1004	Vinblastine	0.00316311	11371
12508	21/01/2016 23:00	11914	25/01/2016 23:00	6231	906793	A375	150	231	Glo	4	199	L2-D5-S	1004	Vinblastine	0.00100035	22552
12508	21/01/2016 23:00	11914	25/01/2016 23:00	6231	906793	A375	150	231	Glo	4	200	L2-D6-S	1004	Vinblastine	0.000316367	17200
12508	21/01/2016 23:00	11914	25/01/2016 23:00	6231	906793	A375	150	231	Glo	4	201	L2-D7-S	1004	Vinblastine	0.000100053	21692
12508	21/01/2016 23:00	11914	25/01/2016 23:00	6231	906793	A375	150	231	Glo	4	216	NC-1	4000	DMSO	NA	20927
12508	21/01/2016 23:00	11914	25/01/2016 23:00	6231	906793	A375	150	231	Glo	4	217	PC1-D2-S	1862	MG-132	1	860
12508	21/01/2016 23:00	11914	25/01/2016 23:00	6231	906793	A375	150	231	Glo	4	239	UN-USED	NA	NA	NA	20736
12508	21/01/2016 23:00	11914	25/01/2016 23:00	6231	906793	A375	150	231	Glo	4	240	UN-USED	NA	NA	NA	17869
12508	21/01/2016 23:00	11914	25/01/2016 23:00	6231	906793	A375	150	231	Glo	4	241	B	NA	NA	NA	96
12508	21/01/2016 23:00	11914	25/01/2016 23:00	6231	906793	A375	150	231	Glo	4	242	UN-USED	NA	NA	NA	20736
12508	21/01/2016 23:00	11914	25/01/2016 23:00	6231	906793	A375	150	231	Glo	4	243	L3-D1-S	1005	Cisplatin	6	9173
12508	21/01/2016 23:00	11914	25/01/2016 23:00	6231	906793	A375	150	231	Glo	4	244	L3-D2-S	1005	Cisplatin	1.89753	9754
12508	21/01/2016 23:00	11914	25/01/2016 23:00	6231	906793	A375	150	231	Glo	4	245	L3-D3-S	1005	Cisplatin	0.600105	17964
12508	21/01/2016 23:00	11914	25/01/2016 23:00	6231	906793	A375	150	231	Glo	4	246	L3-D4-S	1005	Cisplatin	0.189787	21405
12508	21/01/2016 23:00	11914	25/01/2016 23:00	6231	906793	A375	150	231	Glo	4	247	L3-D5-S	1005	Cisplatin	0.0600211	21118
12508	21/01/2016 23:00	11914	25/01/2016 23:00	6231	906793	A375	150	231	Glo	4	248	L3-D6-S	1005	Cisplatin	0.018982	20067
12508	21/01/2016 23:00	11914	25/01/2016 23:00	6231	906793	A375	150	231	Glo	4	249	L3-D7-S	1005	Cisplatin	0.00600316	19971
12508	21/01/2016 23:00	11914	25/01/2016 23:00	6231	906793	A375	150	231	Glo	4	250	L28-D1-S	1091	BMS-536924	10	5160
12508	21/01/2016 23:00	11914	25/01/2016 23:00	6231	906793	A375	150	231	Glo	4	251	L28-D2-S	1091	BMS-536924	3.16256	11084
12508	21/01/2016 23:00	11914	25/01/2016 23:00	6231	906793	A375	150	231	Glo	4	252	L28-D3-S	1091	BMS-536924	1.00018	15575
12508	21/01/2016 23:00	11914	25/01/2016 23:00	6231	906793	A375	150	231	Glo	4	253	L28-D4-S	1091	BMS-536924	0.316311	17964
12508	21/01/2016 23:00	11914	25/01/2016 23:00	6231	906793	A375	150	231	Glo	4	254	L28-D5-S	1091	BMS-536924	0.100035	19589
12508	21/01/2016 23:00	11914	25/01/2016 23:00	6231	906793	A375	150	231	Glo	4	255	L28-D6-S	1091	BMS-536924	0.0316367	19016
12508	21/01/2016 23:00	11914	25/01/2016 23:00	6231	906793	A375	150	231	Glo	4	256	L28-D7-S	1091	BMS-536924	0.0100053	18442
12508	21/01/2016 23:00	11914	25/01/2016 23:00	6231	906793	A375	150	231	Glo	4	264	NC-1	4000	DMSO	NA	15329
12508	21/01/2016 23:00	11914	25/01/2016 23:00	6231	906793	A375	150	231	Glo	4	265	PC1-D3-S	1862	MG-132	0.25	4204
12508	21/01/2016 23:00	11914	25/01/2016 23:00	6231	906793	A375	150	231	Glo	4	287	UN-USED	NA	NA	NA	20831
12508	21/01/2016 23:00	11914	25/01/2016 23:00	6231	906793	A375	150	231	Glo	4	288	UN-USED	NA	NA	NA	15671
12508	21/01/2016 23:00	11914	25/01/2016 23:00	6231	906793	A375	150	231	Glo	4	289	B	NA	NA	NA	96
12508	21/01/2016 23:00	11914	25/01/2016 23:00	6231	906793	A375	150	231	Glo	4	290	UN-USED	NA	NA	NA	23316
12508	21/01/2016 23:00	11914	25/01/2016 23:00	6231	906793	A375	150	231	Glo	4	291	NC-1	4000	DMSO	NA	22456
12508	21/01/2016 23:00	11914	25/01/2016 23:00	6231	906793	A375	150	231	Glo	4	292	L4-D1-S	1006	Cytarabine	2	4395
12508	21/01/2016 23:00	11914	25/01/2016 23:00	6231	906793	A375	150	231	Glo	4	293	L4-D2-S	1006	Cytarabine	0.632511	4682
12508	21/01/2016 23:00	11914	25/01/2016 23:00	6231	906793	A375	150	231	Glo	4	294	L4-D3-S	1006	Cytarabine	0.200035	8261
12508	21/01/2016 23:00	11914	25/01/2016 23:00	6231	906793	A375	150	231	Glo	4	295	L4-D4-S	1006	Cytarabine	0.0632622	16340
12508	21/01/2016 23:00	11914	25/01/2016 23:00	6231	906793	A375	150	231	Glo	4	296	L4-D5-S	1006	Cytarabine	0.020007	21500
12508	21/01/2016 23:00	11914	25/01/2016 23:00	6231	906793	A375	150	231	Glo	4	297	L4-D6-S	1006	Cytarabine	0.00632733	20736
12508	21/01/2016 23:00	11914	25/01/2016 23:00	6231	906793	A375	150	231	Glo	4	298	L4-D7-S	1006	Cytarabine	0.00200105	20067
12508	21/01/2016 23:00	11914	25/01/2016 23:00	6231	906793	A375	150	231	Glo	4	306	NC-1	4000	DMSO	NA	18156
12508	21/01/2016 23:00	11914	25/01/2016 23:00	6231	906793	A375	150	231	Glo	4	307	PC1-D1-S	1862	MG-132	4	1815
12508	21/01/2016 23:00	11914	25/01/2016 23:00	6231	906793	A375	150	231	Glo	4	308	PC2-D1-S	1034	Staurosporine	2	1529
12508	21/01/2016 23:00	11914	25/01/2016 23:00	6231	906793	A375	150	231	Glo	4	309	NC-1	4000	DMSO	NA	20163
12508	21/01/2016 23:00	11914	25/01/2016 23:00	6231	906793	A375	150	231	Glo	4	310	NC-1	4000	DMSO	NA	21596
12508	21/01/2016 23:00	11914	25/01/2016 23:00	6231	906793	A375	150	231	Glo	4	311	NC-1	4000	DMSO	NA	18729
12508	21/01/2016 23:00	11914	25/01/2016 23:00	6231	906793	A375	150	231	Glo	4	312	NC-0	NA	NA	NA	17964
12508	21/01/2016 23:00	11914	25/01/2016 23:00	6231	906793	A375	150	231	Glo	4	313	PC1-D4-S	1862	MG-132	0.0625	20831
12508	21/01/2016 23:00	11914	25/01/2016 23:00	6231	906793	A375	150	231	Glo	4	328	NC-1	4000	DMSO	NA	22169
12508	21/01/2016 23:00	11914	25/01/2016 23:00	6231	906793	A375	150	231	Glo	4	329	PC1-D5-S	1862	MG-132	0.015625	19111
12508	21/01/2016 23:00	11914	25/01/2016 23:00	6231	906793	A375	150	231	Glo	4	330	PC1-D4-S	1862	MG-132	0.0625	15862
12508	21/01/2016 23:00	11914	25/01/2016 23:00	6231	906793	A375	150	231	Glo	4	331	PC1-D3-S	1862	MG-132	0.25	3683
12508	21/01/2016 23:00	11914	25/01/2016 23:00	6231	906793	A375	150	231	Glo	4	332	PC1-D2-S	1862	MG-132	1	955
12508	21/01/2016 23:00	11914	25/01/2016 23:00	6231	906793	A375	150	231	Glo	4	333	PC1-D1-S	1862	MG-132	4	1051
12508	21/01/2016 23:00	11914	25/01/2016 23:00	6231	906793	A375	150	231	Glo	4	334	NC-1	4000	DMSO	NA	14333
12508	21/01/2016 23:00	11914	25/01/2016 23:00	6231	906793	A375	150	231	Glo	4	335	UN-USED	NA	NA	NA	21214
12508	21/01/2016 23:00	11914	25/01/2016 23:00	6231	906793	A375	150	231	Glo	4	336	UN-USED	NA	NA	NA	17678
12508	21/01/2016 23:00	11914	25/01/2016 23:00	6231	906793	A375	150	231	Glo	4	337	B	NA	NA	NA	191
12508	21/01/2016 23:00	11914	25/01/2016 23:00	6231	906793	A375	150	231	Glo	4	338	UN-USED	NA	NA	NA	20258
12508	21/01/2016 23:00	11914	25/01/2016 23:00	6231	906793	A375	150	231	Glo	4	339	NC-1	4000	DMSO	NA	19207
12508	21/01/2016 23:00	11914	25/01/2016 23:00	6231	906793	A375	150	231	Glo	4	340	L5-D1-S	1007	Docetaxel	0.0125	8217
12508	21/01/2016 23:00	11914	25/01/2016 23:00	6231	906793	A375	150	231	Glo	4	341	L5-D2-S	1007	Docetaxel	0.00395319	7357
12508	21/01/2016 23:00	11914	25/01/2016 23:00	6231	906793	A375	150	231	Glo	4	342	L5-D3-S	1007	Docetaxel	0.00125022	10551
12508	21/01/2016 23:00	11914	25/01/2016 23:00	6231	906793	A375	150	231	Glo	4	343	L5-D4-S	1007	Docetaxel	0.000395389	16435
12508	21/01/2016 23:00	11914	25/01/2016 23:00	6231	906793	A375	150	231	Glo	4	344	L5-D5-S	1007	Docetaxel	0.000125044	17869
12508	21/01/2016 23:00	11914	25/01/2016 23:00	6231	906793	A375	150	231	Glo	4	345	L5-D6-S	1007	Docetaxel	3.95e-05	17582
12508	21/01/2016 23:00	11914	25/01/2016 23:00	6231	906793	A375	150	231	Glo	4	346	L5-D7-S	1007	Docetaxel	1.25e-05	19780
12508	21/01/2016 23:00	11914	25/01/2016 23:00	6231	906793	A375	150	231	Glo	4	361	PC1-D5-S	1862	MG-132	0.015625	18538
12508	21/01/2016 23:00	11914	25/01/2016 23:00	6231	906793	A375	150	231	Glo	4	369	NC-1	4000	DMSO	NA	20449
12508	21/01/2016 23:00	11914	25/01/2016 23:00	6231	906793	A375	150	231	Glo	4	370	NC-1	4000	DMSO	NA	22169
12508	21/01/2016 23:00	11914	25/01/2016 23:00	6231	906793	A375	150	231	Glo	4	371	NC-1	4000	DMSO	NA	19111
12508	21/01/2016 23:00	11914	25/01/2016 23:00	6231	906793	A375	150	231	Glo	4	372	PC1-D1-S	1862	MG-132	4	2484
12508	21/01/2016 23:00	11914	25/01/2016 23:00	6231	906793	A375	150	231	Glo	4	373	PC2-D1-S	1034	Staurosporine	2	1338
12508	21/01/2016 23:00	11914	25/01/2016 23:00	6231	906793	A375	150	231	Glo	4	374	NC-1	4000	DMSO	NA	16722
12508	21/01/2016 23:00	11914	25/01/2016 23:00	6231	906793	A375	150	231	Glo	4	375	NC-1	4000	DMSO	NA	16722
12508	21/01/2016 23:00	11914	25/01/2016 23:00	6231	906793	A375	150	231	Glo	4	383	UN-USED	NA	NA	NA	21405
12508	21/01/2016 23:00	11914	25/01/2016 23:00	6231	906793	A375	150	231	Glo	4	384	UN-USED	NA	NA	NA	19016
12508	21/01/2016 23:00	11914	25/01/2016 23:00	6231	906793	A375	150	231	Glo	4	385	B	NA	NA	NA	191
12508	21/01/2016 23:00	11914	25/01/2016 23:00	6231	906793	A375	150	231	Glo	4	386	UN-USED	NA	NA	NA	25132
12508	21/01/2016 23:00	11914	25/01/2016 23:00	6231	906793	A375	150	231	Glo	4	387	NC-1	4000	DMSO	NA	20449
12508	21/01/2016 23:00	11914	25/01/2016 23:00	6231	906793	A375	150	231	Glo	4	388	L6-D1-S	1010	Gefitinib	2	20640
12508	21/01/2016 23:00	11914	25/01/2016 23:00	6231	906793	A375	150	231	Glo	4	389	L6-D2-S	1010	Gefitinib	0.632511	19685
12508	21/01/2016 23:00	11914	25/01/2016 23:00	6231	906793	A375	150	231	Glo	4	390	L6-D3-S	1010	Gefitinib	0.200035	19876
12508	21/01/2016 23:00	11914	25/01/2016 23:00	6231	906793	A375	150	231	Glo	4	391	L6-D4-S	1010	Gefitinib	0.0632622	21978
12508	21/01/2016 23:00	11914	25/01/2016 23:00	6231	906793	A375	150	231	Glo	4	392	L6-D5-S	1010	Gefitinib	0.020007	19780
12508	21/01/2016 23:00	11914	25/01/2016 23:00	6231	906793	A375	150	231	Glo	4	393	L6-D6-S	1010	Gefitinib	0.00632733	19016
12508	21/01/2016 23:00	11914	25/01/2016 23:00	6231	906793	A375	150	231	Glo	4	394	L6-D7-S	1010	Gefitinib	0.00200105	17200
12508	21/01/2016 23:00	11914	25/01/2016 23:00	6231	906793	A375	150	231	Glo	4	430	NC-1	4000	DMSO	NA	19685
12508	21/01/2016 23:00	11914	25/01/2016 23:00	6231	906793	A375	150	231	Glo	4	431	UN-USED	NA	NA	NA	20927
12508	21/01/2016 23:00	11914	25/01/2016 23:00	6231	906793	A375	150	231	Glo	4	432	UN-USED	NA	NA	NA	21118
12508	21/01/2016 23:00	11914	25/01/2016 23:00	6231	906793	A375	150	231	Glo	4	433	B	NA	NA	NA	0
12508	21/01/2016 23:00	11914	25/01/2016 23:00	6231	906793	A375	150	231	Glo	4	434	UN-USED	NA	NA	NA	23507
12508	21/01/2016 23:00	11914	25/01/2016 23:00	6231	906793	A375	150	231	Glo	4	435	NC-1	4000	DMSO	NA	21500
12508	21/01/2016 23:00	11914	25/01/2016 23:00	6231	906793	A375	150	231	Glo	4	478	NC-1	4000	DMSO	NA	19302
12508	21/01/2016 23:00	11914	25/01/2016 23:00	6231	906793	A375	150	231	Glo	4	479	UN-USED	NA	NA	NA	19398
12508	21/01/2016 23:00	11914	25/01/2016 23:00	6231	906793	A375	150	231	Glo	4	480	UN-USED	NA	NA	NA	17869
12508	21/01/2016 23:00	11914	25/01/2016 23:00	6231	906793	A375	150	231	Glo	4	481	B	NA	NA	NA	191
12508	21/01/2016 23:00	11914	25/01/2016 23:00	6231	906793	A375	150	231	Glo	4	482	UN-USED	NA	NA	NA	27235
12508	21/01/2016 23:00	11914	25/01/2016 23:00	6231	906793	A375	150	231	Glo	4	483	L8-D1-S	1012	Vorinostat	10	1338
12508	21/01/2016 23:00	11914	25/01/2016 23:00	6231	906793	A375	150	231	Glo	4	484	L8-D2-S	1012	Vorinostat	3.16256	9364
12508	21/01/2016 23:00	11914	25/01/2016 23:00	6231	906793	A375	150	231	Glo	4	485	L8-D3-S	1012	Vorinostat	1.00018	19012
12508	21/01/2016 23:00	11914	25/01/2016 23:00	6231	906793	A375	150	231	Glo	4	486	L8-D4-S	1012	Vorinostat	0.316311	18251
12508	21/01/2016 23:00	11914	25/01/2016 23:00	6231	906793	A375	150	231	Glo	4	487	L8-D5-S	1012	Vorinostat	0.100035	23316
12508	21/01/2016 23:00	11914	25/01/2016 23:00	6231	906793	A375	150	231	Glo	4	488	L8-D6-S	1012	Vorinostat	0.0316367	18920
12508	21/01/2016 23:00	11914	25/01/2016 23:00	6231	906793	A375	150	231	Glo	4	489	L8-D7-S	1012	Vorinostat	0.0100053	21787
12508	21/01/2016 23:00	11914	25/01/2016 23:00	6231	906793	A375	150	231	Glo	4	490	NC-1	4000	DMSO	NA	18156
12508	21/01/2016 23:00	11914	25/01/2016 23:00	6231	906793	A375	150	231	Glo	4	491	NC-1	4000	DMSO	NA	18920
12508	21/01/2016 23:00	11914	25/01/2016 23:00	6231	906793	A375	150	231	Glo	4	492	PC2-D1-S	1034	Staurosporine	2	2771
12508	21/01/2016 23:00	11914	25/01/2016 23:00	6231	906793	A375	150	231	Glo	4	493	PC1-D1-S	1862	MG-132	4	1338
12508	21/01/2016 23:00	11914	25/01/2016 23:00	6231	906793	A375	150	231	Glo	4	494	NC-1	4000	DMSO	NA	21118
12508	21/01/2016 23:00	11914	25/01/2016 23:00	6231	906793	A375	150	231	Glo	4	495	NC-1	4000	DMSO	NA	22838
12508	21/01/2016 23:00	11914	25/01/2016 23:00	6231	906793	A375	150	231	Glo	4	496	NC-1	4000	DMSO	NA	21023
12508	21/01/2016 23:00	11914	25/01/2016 23:00	6231	906793	A375	150	231	Glo	4	497	NC-1	4000	DMSO	NA	23125
12508	21/01/2016 23:00	11914	25/01/2016 23:00	6231	906793	A375	150	231	Glo	4	519	NC-1	4000	DMSO	NA	20449
12508	21/01/2016 23:00	11914	25/01/2016 23:00	6231	906793	A375	150	231	Glo	4	527	UN-USED	NA	NA	NA	22456
12508	21/01/2016 23:00	11914	25/01/2016 23:00	6231	906793	A375	150	231	Glo	4	528	UN-USED	NA	NA	NA	18060
12508	21/01/2016 23:00	11914	25/01/2016 23:00	6231	906793	A375	150	231	Glo	4	529	B	NA	NA	NA	191
12508	21/01/2016 23:00	11914	25/01/2016 23:00	6231	906793	A375	150	231	Glo	4	530	UN-USED	NA	NA	NA	24750
12508	21/01/2016 23:00	11914	25/01/2016 23:00	6231	906793	A375	150	231	Glo	4	531	L9-D1-S	1013	Nilotinib	2	20736
12508	21/01/2016 23:00	11914	25/01/2016 23:00	6231	906793	A375	150	231	Glo	4	532	L9-D2-S	1013	Nilotinib	0.632511	21405
12508	21/01/2016 23:00	11914	25/01/2016 23:00	6231	906793	A375	150	231	Glo	4	533	L9-D3-S	1013	Nilotinib	0.200035	19207
12508	21/01/2016 23:00	11914	25/01/2016 23:00	6231	906793	A375	150	231	Glo	4	534	L9-D4-S	1013	Nilotinib	0.0632622	20640
12508	21/01/2016 23:00	11914	25/01/2016 23:00	6231	906793	A375	150	231	Glo	4	535	L9-D5-S	1013	Nilotinib	0.020007	16435
12508	21/01/2016 23:00	11914	25/01/2016 23:00	6231	906793	A375	150	231	Glo	4	536	L9-D6-S	1013	Nilotinib	0.00632733	23193
12508	21/01/2016 23:00	11914	25/01/2016 23:00	6231	906793	A375	150	231	Glo	4	537	L9-D7-S	1013	Nilotinib	0.00200105	21883
12508	21/01/2016 23:00	11914	25/01/2016 23:00	6231	906793	A375	150	231	Glo	4	552	NC-1	4000	DMSO	NA	19589
12508	21/01/2016 23:00	11914	25/01/2016 23:00	6231	906793	A375	150	231	Glo	4	560	NC-1	4000	DMSO	NA	20545
12508	21/01/2016 23:00	11914	25/01/2016 23:00	6231	906793	A375	150	231	Glo	4	561	PC2-D5-S	1034	Staurosporine	0.0078125	16531
12508	21/01/2016 23:00	11914	25/01/2016 23:00	6231	906793	A375	150	231	Glo	4	562	PC2-D4-S	1034	Staurosporine	0.03125	10702
12508	21/01/2016 23:00	11914	25/01/2016 23:00	6231	906793	A375	150	231	Glo	4	563	PC2-D3-S	1034	Staurosporine	0.125	8026
12508	21/01/2016 23:00	11914	25/01/2016 23:00	6231	906793	A375	150	231	Glo	4	564	PC2-D2-S	1034	Staurosporine	0.5	2866
12508	21/01/2016 23:00	11914	25/01/2016 23:00	6231	906793	A375	150	231	Glo	4	565	PC2-D1-S	1034	Staurosporine	2	860
12508	21/01/2016 23:00	11914	25/01/2016 23:00	6231	906793	A375	150	231	Glo	4	566	NC-1	4000	DMSO	NA	17869
12508	21/01/2016 23:00	11914	25/01/2016 23:00	6231	906793	A375	150	231	Glo	4	567	PC1-D1-S	1862	MG-132	4	2771
12508	21/01/2016 23:00	11914	25/01/2016 23:00	6231	906793	A375	150	231	Glo	4	575	UN-USED	NA	NA	NA	23221
12508	21/01/2016 23:00	11914	25/01/2016 23:00	6231	906793	A375	150	231	Glo	4	576	UN-USED	NA	NA	NA	19111
12508	21/01/2016 23:00	11914	25/01/2016 23:00	6231	906793	A375	150	231	Glo	4	577	B	NA	NA	NA	299
12508	21/01/2016 23:00	11914	25/01/2016 23:00	6231	906793	A375	150	231	Glo	4	578	UN-USED	NA	NA	NA	23125
12508	21/01/2016 23:00	11914	25/01/2016 23:00	6231	906793	A375	150	231	Glo	4	579	L10-D1-S	1022	AZD7762	10	1433
12508	21/01/2016 23:00	11914	25/01/2016 23:00	6231	906793	A375	150	231	Glo	4	580	L10-D2-S	1022	AZD7762	3.16256	4109
12508	21/01/2016 23:00	11914	25/01/2016 23:00	6231	906793	A375	150	231	Glo	4	581	L10-D3-S	1022	AZD7762	1.00018	9268
12508	21/01/2016 23:00	11914	25/01/2016 23:00	6231	906793	A375	150	231	Glo	4	582	L10-D4-S	1022	AZD7762	0.316311	16913
12508	21/01/2016 23:00	11914	25/01/2016 23:00	6231	906793	A375	150	231	Glo	4	583	L10-D5-S	1022	AZD7762	0.100035	21405
12508	21/01/2016 23:00	11914	25/01/2016 23:00	6231	906793	A375	150	231	Glo	4	584	L10-D6-S	1022	AZD7762	0.0316367	19971
12508	21/01/2016 23:00	11914	25/01/2016 23:00	6231	906793	A375	150	231	Glo	4	585	L10-D7-S	1022	AZD7762	0.0100053	21596
12508	21/01/2016 23:00	11914	25/01/2016 23:00	6231	906793	A375	150	231	Glo	4	600	NC-1	4000	DMSO	NA	19971
12508	21/01/2016 23:00	11914	25/01/2016 23:00	6231	906793	A375	150	231	Glo	4	615	NC-1	4000	DMSO	NA	16627
12508	21/01/2016 23:00	11914	25/01/2016 23:00	6231	906793	A375	150	231	Glo	4	623	UN-USED	NA	NA	NA	22361
12508	21/01/2016 23:00	11914	25/01/2016 23:00	6231	906793	A375	150	231	Glo	4	624	UN-USED	NA	NA	NA	19685
12508	21/01/2016 23:00	11914	25/01/2016 23:00	6231	906793	A375	150	231	Glo	4	625	B	NA	NA	NA	0
12508	21/01/2016 23:00	11914	25/01/2016 23:00	6231	906793	A375	150	231	Glo	4	626	UN-USED	NA	NA	NA	25419
12508	21/01/2016 23:00	11914	25/01/2016 23:00	6231	906793	A375	150	231	Glo	4	627	L11-D1-S	1032	Afatinib	10	2006
12508	21/01/2016 23:00	11914	25/01/2016 23:00	6231	906793	A375	150	231	Glo	4	628	L11-D2-S	1032	Afatinib	3.16256	13377
12508	21/01/2016 23:00	11914	25/01/2016 23:00	6231	906793	A375	150	231	Glo	4	629	L11-D3-S	1032	Afatinib	1.00018	20258
12508	21/01/2016 23:00	11914	25/01/2016 23:00	6231	906793	A375	150	231	Glo	4	630	L11-D4-S	1032	Afatinib	0.316311	24368
12508	21/01/2016 23:00	11914	25/01/2016 23:00	6231	906793	A375	150	231	Glo	4	631	L11-D5-S	1032	Afatinib	0.100035	21214
12508	21/01/2016 23:00	11914	25/01/2016 23:00	6231	906793	A375	150	231	Glo	4	632	L11-D6-S	1032	Afatinib	0.0316367	23221
12508	21/01/2016 23:00	11914	25/01/2016 23:00	6231	906793	A375	150	231	Glo	4	633	L11-D7-S	1032	Afatinib	0.0100053	22647
12508	21/01/2016 23:00	11914	25/01/2016 23:00	6231	906793	A375	150	231	Glo	4	634	L35-D1-S	1199	Tamoxifen	10	14811
12508	21/01/2016 23:00	11914	25/01/2016 23:00	6231	906793	A375	150	231	Glo	4	635	L35-D2-S	1199	Tamoxifen	3.16256	18347
12508	21/01/2016 23:00	11914	25/01/2016 23:00	6231	906793	A375	150	231	Glo	4	636	L35-D3-S	1199	Tamoxifen	1.00018	21405
12508	21/01/2016 23:00	11914	25/01/2016 23:00	6231	906793	A375	150	231	Glo	4	637	L35-D4-S	1199	Tamoxifen	0.316311	20831
12508	21/01/2016 23:00	11914	25/01/2016 23:00	6231	906793	A375	150	231	Glo	4	638	L35-D5-S	1199	Tamoxifen	0.100035	19971
12508	21/01/2016 23:00	11914	25/01/2016 23:00	6231	906793	A375	150	231	Glo	4	639	L35-D6-S	1199	Tamoxifen	0.0316367	21692
12508	21/01/2016 23:00	11914	25/01/2016 23:00	6231	906793	A375	150	231	Glo	4	640	L35-D7-S	1199	Tamoxifen	0.0100053	23125
12508	21/01/2016 23:00	11914	25/01/2016 23:00	6231	906793	A375	150	231	Glo	4	641	NC-1	4000	DMSO	NA	19494
12508	21/01/2016 23:00	11914	25/01/2016 23:00	6231	906793	A375	150	231	Glo	4	663	NC-1	4000	DMSO	NA	23890
12508	21/01/2016 23:00	11914	25/01/2016 23:00	6231	906793	A375	150	231	Glo	4	671	UN-USED	NA	NA	NA	23316
12508	21/01/2016 23:00	11914	25/01/2016 23:00	6231	906793	A375	150	231	Glo	4	672	UN-USED	NA	NA	NA	19016
12508	21/01/2016 23:00	11914	25/01/2016 23:00	6231	906793	A375	150	231	Glo	4	673	B	NA	NA	NA	299
12508	21/01/2016 23:00	11914	25/01/2016 23:00	6231	906793	A375	150	231	Glo	4	674	UN-USED	NA	NA	NA	26566
12508	21/01/2016 23:00	11914	25/01/2016 23:00	6231	906793	A375	150	231	Glo	4	675	NC-1	4000	DMSO	NA	17487
12508	21/01/2016 23:00	11914	25/01/2016 23:00	6231	906793	A375	150	231	Glo	4	676	PC2-D1-S	1034	Staurosporine	2	1529
12508	21/01/2016 23:00	11914	25/01/2016 23:00	6231	906793	A375	150	231	Glo	4	677	PC1-D1-S	1862	MG-132	4	1147
12508	21/01/2016 23:00	11914	25/01/2016 23:00	6231	906793	A375	150	231	Glo	4	678	NC-1	4000	DMSO	NA	21500
12508	21/01/2016 23:00	11914	25/01/2016 23:00	6231	906793	A375	150	231	Glo	4	679	NC-0	NA	NA	NA	22074
12508	21/01/2016 23:00	11914	25/01/2016 23:00	6231	906793	A375	150	231	Glo	4	680	NC-1	4000	DMSO	NA	20258
12508	21/01/2016 23:00	11914	25/01/2016 23:00	6231	906793	A375	150	231	Glo	4	681	NC-1	4000	DMSO	NA	22265
12508	21/01/2016 23:00	11914	25/01/2016 23:00	6231	906793	A375	150	231	Glo	4	689	NC-1	4000	DMSO	NA	20736
12508	21/01/2016 23:00	11914	25/01/2016 23:00	6231	906793	A375	150	231	Glo	4	711	NC-1	4000	DMSO	NA	19211
12508	21/01/2016 23:00	11914	25/01/2016 23:00	6231	906793	A375	150	231	Glo	4	719	UN-USED	NA	NA	NA	24559
12508	21/01/2016 23:00	11914	25/01/2016 23:00	6231	906793	A375	150	231	Glo	4	720	UN-USED	NA	NA	NA	17487
12508	21/01/2016 23:00	11914	25/01/2016 23:00	6231	906793	A375	150	231	Glo	4	721	B	NA	NA	NA	96
12508	21/01/2016 23:00	11914	25/01/2016 23:00	6231	906793	A375	150	231	Glo	4	722	UN-USED	NA	NA	NA	27617
12508	21/01/2016 23:00	11914	25/01/2016 23:00	6231	906793	A375	150	231	Glo	4	723	L12-D1-S	1036	PLX4720	10	7453
12508	21/01/2016 23:00	11914	25/01/2016 23:00	6231	906793	A375	150	231	Glo	4	724	L12-D2-S	1036	PLX4720	3.16256	8982
12508	21/01/2016 23:00	11914	25/01/2016 23:00	6231	906793	A375	150	231	Glo	4	725	L12-D3-S	1036	PLX4720	1.00018	9077
12508	21/01/2016 23:00	11914	25/01/2016 23:00	6231	906793	A375	150	231	Glo	4	726	L12-D4-S	1036	PLX4720	0.316311	16722
12508	21/01/2016 23:00	11914	25/01/2016 23:00	6231	906793	A375	150	231	Glo	4	727	L12-D5-S	1036	PLX4720	0.100035	20163
12508	21/01/2016 23:00	11914	25/01/2016 23:00	6231	906793	A375	150	231	Glo	4	728	L12-D6-S	1036	PLX4720	0.0316367	18729
12508	21/01/2016 23:00	11914	25/01/2016 23:00	6231	906793	A375	150	231	Glo	4	729	L12-D7-S	1036	PLX4720	0.0100053	21596
12508	21/01/2016 23:00	11914	25/01/2016 23:00	6231	906793	A375	150	231	Glo	4	730	NC-1	4000	DMSO	NA	25514
12508	21/01/2016 23:00	11914	25/01/2016 23:00	6231	906793	A375	150	231	Glo	4	738	NC-0	NA	NA	NA	18060
12508	21/01/2016 23:00	11914	25/01/2016 23:00	6231	906793	A375	150	231	Glo	4	739	NC-1	4000	DMSO	NA	24081
12508	21/01/2016 23:00	11914	25/01/2016 23:00	6231	906793	A375	150	231	Glo	4	740	NC-1	4000	DMSO	NA	19207
12508	21/01/2016 23:00	11914	25/01/2016 23:00	6231	906793	A375	150	231	Glo	4	741	PC2-D1-S	1034	Staurosporine	2	1911
12508	21/01/2016 23:00	11914	25/01/2016 23:00	6231	906793	A375	150	231	Glo	4	742	PC1-D1-S	1862	MG-132	4	2484
12508	21/01/2016 23:00	11914	25/01/2016 23:00	6231	906793	A375	150	231	Glo	4	743	NC-1	4000	DMSO	NA	23221
12508	21/01/2016 23:00	11914	25/01/2016 23:00	6231	906793	A375	150	231	Glo	4	744	NC-1	4000	DMSO	NA	21998
12508	21/01/2016 23:00	11914	25/01/2016 23:00	6231	906793	A375	150	231	Glo	4	759	NC-1	4000	DMSO	NA	17678
12508	21/01/2016 23:00	11914	25/01/2016 23:00	6231	906793	A375	150	231	Glo	4	767	UN-USED	NA	NA	NA	23221
12508	21/01/2016 23:00	11914	25/01/2016 23:00	6231	906793	A375	150	231	Glo	4	768	UN-USED	NA	NA	NA	21787
12508	21/01/2016 23:00	11914	25/01/2016 23:00	6231	906793	A375	150	231	Glo	4	769	B	NA	NA	NA	191
12508	21/01/2016 23:00	11914	25/01/2016 23:00	6231	906793	A375	150	231	Glo	4	770	UN-USED	NA	NA	NA	23603
12508	21/01/2016 23:00	11914	25/01/2016 23:00	6231	906793	A375	150	231	Glo	4	771	L13-D1-S	1046	681640	10	5637
12508	21/01/2016 23:00	11914	25/01/2016 23:00	6231	906793	A375	150	231	Glo	4	772	L13-D2-S	1046	681640	3.16256	9268
12508	21/01/2016 23:00	11914	25/01/2016 23:00	6231	906793	A375	150	231	Glo	4	773	L13-D3-S	1046	681640	1.00018	16531
12508	21/01/2016 23:00	11914	25/01/2016 23:00	6231	906793	A375	150	231	Glo	4	774	L13-D4-S	1046	681640	0.316311	18825
12508	21/01/2016 23:00	11914	25/01/2016 23:00	6231	906793	A375	150	231	Glo	4	775	L13-D5-S	1046	681640	0.100035	22647
12508	21/01/2016 23:00	11914	25/01/2016 23:00	6231	906793	A375	150	231	Glo	4	776	L13-D6-S	1046	681640	0.0316367	23507
12508	21/01/2016 23:00	11914	25/01/2016 23:00	6231	906793	A375	150	231	Glo	4	777	L13-D7-S	1046	681640	0.0100053	21214
12508	21/01/2016 23:00	11914	25/01/2016 23:00	6231	906793	A375	150	231	Glo	4	778	NC-1	4000	DMSO	NA	20405
12508	21/01/2016 23:00	11914	25/01/2016 23:00	6231	906793	A375	150	231	Glo	4	779	L38-D1-S	1239	YK 4-279	20	8600
12508	21/01/2016 23:00	11914	25/01/2016 23:00	6231	906793	A375	150	231	Glo	4	780	L38-D2-S	1239	YK 4-279	6.32511	6306
12508	21/01/2016 23:00	11914	25/01/2016 23:00	6231	906793	A375	150	231	Glo	4	781	L38-D3-S	1239	YK 4-279	2.00035	7548
12508	21/01/2016 23:00	11914	25/01/2016 23:00	6231	906793	A375	150	231	Glo	4	782	L38-D4-S	1239	YK 4-279	0.632622	13039
12508	21/01/2016 23:00	11914	25/01/2016 23:00	6231	906793	A375	150	231	Glo	4	783	L38-D5-S	1239	YK 4-279	0.20007	21118
12508	21/01/2016 23:00	11914	25/01/2016 23:00	6231	906793	A375	150	231	Glo	4	784	L38-D6-S	1239	YK 4-279	0.0632733	22838
12508	21/01/2016 23:00	11914	25/01/2016 23:00	6231	906793	A375	150	231	Glo	4	785	L38-D7-S	1239	YK 4-279	0.0200105	22169
12508	21/01/2016 23:00	11914	25/01/2016 23:00	6231	906793	A375	150	231	Glo	4	793	NC-1	4000	DMSO	NA	20640
12508	21/01/2016 23:00	11914	25/01/2016 23:00	6231	906793	A375	150	231	Glo	4	794	NC-1	4000	DMSO	NA	21023
12508	21/01/2016 23:00	11914	25/01/2016 23:00	6231	906793	A375	150	231	Glo	4	795	PC2-D1-S	1034	Staurosporine	2	2866
12508	21/01/2016 23:00	11914	25/01/2016 23:00	6231	906793	A375	150	231	Glo	4	796	PC1-D1-S	1862	MG-132	4	1720
12508	21/01/2016 23:00	11914	25/01/2016 23:00	6231	906793	A375	150	231	Glo	4	797	NC-1	4000	DMSO	NA	19971
12508	21/01/2016 23:00	11914	25/01/2016 23:00	6231	906793	A375	150	231	Glo	4	798	NC-1	4000	DMSO	NA	21023
12508	21/01/2016 23:00	11914	25/01/2016 23:00	6231	906793	A375	150	231	Glo	4	799	NC-0	NA	NA	NA	22838
12508	21/01/2016 23:00	11914	25/01/2016 23:00	6231	906793	A375	150	231	Glo	4	807	NC-1	4000	DMSO	NA	22169
12508	21/01/2016 23:00	11914	25/01/2016 23:00	6231	906793	A375	150	231	Glo	4	815	UN-USED	NA	NA	NA	25706
12508	21/01/2016 23:00	11914	25/01/2016 23:00	6231	906793	A375	150	231	Glo	4	816	UN-USED	NA	NA	NA	20067
12508	21/01/2016 23:00	11914	25/01/2016 23:00	6231	906793	A375	150	231	Glo	4	817	B	NA	NA	NA	191
12508	21/01/2016 23:00	11914	25/01/2016 23:00	6231	906793	A375	150	231	Glo	4	818	UN-USED	NA	NA	NA	23412
12508	21/01/2016 23:00	11914	25/01/2016 23:00	6231	906793	A375	150	231	Glo	4	819	L14-D1-S	1047	Nutlin-3a (-)	8	8886
12508	21/01/2016 23:00	11914	25/01/2016 23:00	6231	906793	A375	150	231	Glo	4	820	L14-D2-S	1047	Nutlin-3a (-)	2.53004	11562
12508	21/01/2016 23:00	11914	25/01/2016 23:00	6231	906793	A375	150	231	Glo	4	821	L14-D3-S	1047	Nutlin-3a (-)	0.800141	17104
12508	21/01/2016 23:00	11914	25/01/2016 23:00	6231	906793	A375	150	231	Glo	4	822	L14-D4-S	1047	Nutlin-3a (-)	0.253049	22169
12508	21/01/2016 23:00	11914	25/01/2016 23:00	6231	906793	A375	150	231	Glo	4	823	L14-D5-S	1047	Nutlin-3a (-)	0.0800281	21596
12508	21/01/2016 23:00	11914	25/01/2016 23:00	6231	906793	A375	150	231	Glo	4	824	L14-D6-S	1047	Nutlin-3a (-)	0.0253093	24081
12508	21/01/2016 23:00	11914	25/01/2016 23:00	6231	906793	A375	150	231	Glo	4	825	L14-D7-S	1047	Nutlin-3a (-)	0.00800422	24176
12508	21/01/2016 23:00	11914	25/01/2016 23:00	6231	906793	A375	150	231	Glo	4	826	NC-1	4000	DMSO	NA	21214
12508	21/01/2016 23:00	11914	25/01/2016 23:00	6231	906793	A375	150	231	Glo	4	827	L39-D1-S	1259	Talazoparib	10	10451
12508	21/01/2016 23:00	11914	25/01/2016 23:00	6231	906793	A375	150	231	Glo	4	828	L39-D2-S	1259	Talazoparib	3.16256	9460
12508	21/01/2016 23:00	11914	25/01/2016 23:00	6231	906793	A375	150	231	Glo	4	829	L39-D3-S	1259	Talazoparib	1.00018	9364
12508	21/01/2016 23:00	11914	25/01/2016 23:00	6231	906793	A375	150	231	Glo	4	830	L39-D4-S	1259	Talazoparib	0.316311	14142
12508	21/01/2016 23:00	11914	25/01/2016 23:00	6231	906793	A375	150	231	Glo	4	831	L39-D5-S	1259	Talazoparib	0.100035	16913
12508	21/01/2016 23:00	11914	25/01/2016 23:00	6231	906793	A375	150	231	Glo	4	832	L39-D6-S	1259	Talazoparib	0.0316367	19207
12508	21/01/2016 23:00	11914	25/01/2016 23:00	6231	906793	A375	150	231	Glo	4	833	L39-D7-S	1259	Talazoparib	0.0100053	23890
12508	21/01/2016 23:00	11914	25/01/2016 23:00	6231	906793	A375	150	231	Glo	4	848	NC-1	4000	DMSO	NA	22743
12508	21/01/2016 23:00	11914	25/01/2016 23:00	6231	906793	A375	150	231	Glo	4	856	NC-1	4000	DMSO	NA	20831
12508	21/01/2016 23:00	11914	25/01/2016 23:00	6231	906793	A375	150	231	Glo	4	857	NC-1	4000	DMSO	NA	20258
12508	21/01/2016 23:00	11914	25/01/2016 23:00	6231	906793	A375	150	231	Glo	4	858	NC-0	NA	NA	NA	21309
12508	21/01/2016 23:00	11914	25/01/2016 23:00	6231	906793	A375	150	231	Glo	4	859	NC-1	4000	DMSO	NA	22265
12508	21/01/2016 23:00	11914	25/01/2016 23:00	6231	906793	A375	150	231	Glo	4	860	PC2-D1-S	1034	Staurosporine	2	2580
12508	21/01/2016 23:00	11914	25/01/2016 23:00	6231	906793	A375	150	231	Glo	4	861	PC1-D1-S	1862	MG-132	4	1624
12508	21/01/2016 23:00	11914	25/01/2016 23:00	6231	906793	A375	150	231	Glo	4	862	NC-1	4000	DMSO	NA	18713
12508	21/01/2016 23:00	11914	25/01/2016 23:00	6231	906793	A375	150	231	Glo	4	863	UN-USED	NA	NA	NA	20258
12508	21/01/2016 23:00	11914	25/01/2016 23:00	6231	906793	A375	150	231	Glo	4	864	UN-USED	NA	NA	NA	21978
12508	21/01/2016 23:00	11914	25/01/2016 23:00	6231	906793	A375	150	231	Glo	4	865	B	NA	NA	NA	96
12508	21/01/2016 23:00	11914	25/01/2016 23:00	6231	906793	A375	150	231	Glo	4	866	UN-USED	NA	NA	NA	25881
12508	21/01/2016 23:00	11914	25/01/2016 23:00	6231	906793	A375	150	231	Glo	4	867	L15-D1-S	1049	PD-173074	2	22169
12508	21/01/2016 23:00	11914	25/01/2016 23:00	6231	906793	A375	150	231	Glo	4	868	L15-D2-S	1049	PD-173074	0.632511	23316
12508	21/01/2016 23:00	11914	25/01/2016 23:00	6231	906793	A375	150	231	Glo	4	869	L15-D3-S	1049	PD-173074	0.200035	20449
12508	21/01/2016 23:00	11914	25/01/2016 23:00	6231	906793	A375	150	231	Glo	4	870	L15-D4-S	1049	PD-173074	0.0632622	21883
12508	21/01/2016 23:00	11914	25/01/2016 23:00	6231	906793	A375	150	231	Glo	4	871	L15-D5-S	1049	PD-173074	0.020007	20927
12508	21/01/2016 23:00	11914	25/01/2016 23:00	6231	906793	A375	150	231	Glo	4	872	L15-D6-S	1049	PD-173074	0.00632733	23507
12508	21/01/2016 23:00	11914	25/01/2016 23:00	6231	906793	A375	150	231	Glo	4	873	L15-D7-S	1049	PD-173074	0.00200105	25419
12508	21/01/2016 23:00	11914	25/01/2016 23:00	6231	906793	A375	150	231	Glo	4	874	NC-1	4000	DMSO	NA	23316
12508	21/01/2016 23:00	11914	25/01/2016 23:00	6231	906793	A375	150	231	Glo	4	875	L40-D1-S	1372	Trametinib	1	8695
12508	21/01/2016 23:00	11914	25/01/2016 23:00	6231	906793	A375	150	231	Glo	4	876	L40-D2-S	1372	Trametinib	0.316256	7166
12508	21/01/2016 23:00	11914	25/01/2016 23:00	6231	906793	A375	150	231	Glo	4	877	L40-D3-S	1372	Trametinib	0.100018	8982
12508	21/01/2016 23:00	11914	25/01/2016 23:00	6231	906793	A375	150	231	Glo	4	878	L40-D4-S	1372	Trametinib	0.0316311	7740
12508	21/01/2016 23:00	11914	25/01/2016 23:00	6231	906793	A375	150	231	Glo	4	879	L40-D5-S	1372	Trametinib	0.0100035	7548
12508	21/01/2016 23:00	11914	25/01/2016 23:00	6231	906793	A375	150	231	Glo	4	880	L40-D6-S	1372	Trametinib	0.00316367	12040
12508	21/01/2016 23:00	11914	25/01/2016 23:00	6231	906793	A375	150	231	Glo	4	881	L40-D7-S	1372	Trametinib	0.00100053	14238
12508	21/01/2016 23:00	11914	25/01/2016 23:00	6231	906793	A375	150	231	Glo	4	896	NC-1	4000	DMSO	NA	21214
12508	21/01/2016 23:00	11914	25/01/2016 23:00	6231	906793	A375	150	231	Glo	4	911	UN-USED	NA	NA	NA	21596
12508	21/01/2016 23:00	11914	25/01/2016 23:00	6231	906793	A375	150	231	Glo	4	912	UN-USED	NA	NA	NA	16435
12508	21/01/2016 23:00	11914	25/01/2016 23:00	6231	906793	A375	150	231	Glo	4	913	B	NA	NA	NA	96
12508	21/01/2016 23:00	11914	25/01/2016 23:00	6231	906793	A375	150	231	Glo	4	914	UN-USED	NA	NA	NA	22838
12508	21/01/2016 23:00	11914	25/01/2016 23:00	6231	906793	A375	150	231	Glo	4	915	L16-D1-S	1053	MK-2206	10	18347
12508	21/01/2016 23:00	11914	25/01/2016 23:00	6231	906793	A375	150	231	Glo	4	916	L16-D2-S	1053	MK-2206	3.16256	20449
12508	21/01/2016 23:00	11914	25/01/2016 23:00	6231	906793	A375	150	231	Glo	4	917	L16-D3-S	1053	MK-2206	1.00018	21309
12508	21/01/2016 23:00	11914	25/01/2016 23:00	6231	906793	A375	150	231	Glo	4	918	L16-D4-S	1053	MK-2206	0.316311	23125
12508	21/01/2016 23:00	11914	25/01/2016 23:00	6231	906793	A375	150	231	Glo	4	919	L16-D5-S	1053	MK-2206	0.100035	22894
12508	21/01/2016 23:00	11914	25/01/2016 23:00	6231	906793	A375	150	231	Glo	4	920	L16-D6-S	1053	MK-2206	0.0316367	21596
12508	21/01/2016 23:00	11914	25/01/2016 23:00	6231	906793	A375	150	231	Glo	4	921	L16-D7-S	1053	MK-2206	0.0100053	20640
12508	21/01/2016 23:00	11914	25/01/2016 23:00	6231	906793	A375	150	231	Glo	4	922	NC-1	4000	DMSO	NA	23030
12508	21/01/2016 23:00	11914	25/01/2016 23:00	6231	906793	A375	150	231	Glo	4	923	L41-D1-S	1495	Olaparib	10	14333
12508	21/01/2016 23:00	11914	25/01/2016 23:00	6231	906793	A375	150	231	Glo	4	924	L41-D2-S	1495	Olaparib	3.16256	17869
12508	21/01/2016 23:00	11914	25/01/2016 23:00	6231	906793	A375	150	231	Glo	4	925	L41-D3-S	1495	Olaparib	1.00018	19494
12508	21/01/2016 23:00	11914	25/01/2016 23:00	6231	906793	A375	150	231	Glo	4	926	L41-D4-S	1495	Olaparib	0.316311	19876
12508	21/01/2016 23:00	11914	25/01/2016 23:00	6231	906793	A375	150	231	Glo	4	927	L41-D5-S	1495	Olaparib	0.100035	22265
12508	21/01/2016 23:00	11914	25/01/2016 23:00	6231	906793	A375	150	231	Glo	4	928	L41-D6-S	1495	Olaparib	0.0316367	18156
12508	21/01/2016 23:00	11914	25/01/2016 23:00	6231	906793	A375	150	231	Glo	4	929	L41-D7-S	1495	Olaparib	0.0100053	19780
12508	21/01/2016 23:00	11914	25/01/2016 23:00	6231	906793	A375	150	231	Glo	4	937	NC-1	4000	DMSO	NA	21500
12508	21/01/2016 23:00	11914	25/01/2016 23:00	6231	906793	A375	150	231	Glo	4	959	UN-USED	NA	NA	NA	25992
12508	21/01/2016 23:00	11914	25/01/2016 23:00	6231	906793	A375	150	231	Glo	4	960	UN-USED	NA	NA	NA	15767
12508	21/01/2016 23:00	11914	25/01/2016 23:00	6231	906793	A375	150	231	Glo	4	961	B	NA	NA	NA	287
12508	21/01/2016 23:00	11914	25/01/2016 23:00	6231	906793	A375	150	231	Glo	4	962	UN-USED	NA	NA	NA	21883
12508	21/01/2016 23:00	11914	25/01/2016 23:00	6231	906793	A375	150	231	Glo	4	963	L17-D1-S	1054	PD-0332991	10	12422
12508	21/01/2016 23:00	11914	25/01/2016 23:00	6231	906793	A375	150	231	Glo	4	964	L17-D2-S	1054	PD-0332991	3.16256	14811
12508	21/01/2016 23:00	11914	25/01/2016 23:00	6231	906793	A375	150	231	Glo	4	965	L17-D3-S	1054	PD-0332991	1.00018	15862
12508	21/01/2016 23:00	11914	25/01/2016 23:00	6231	906793	A375	150	231	Glo	4	966	L17-D4-S	1054	PD-0332991	0.316311	21309
12508	21/01/2016 23:00	11914	25/01/2016 23:00	6231	906793	A375	150	231	Glo	4	967	L17-D5-S	1054	PD-0332991	0.100035	25037
12508	21/01/2016 23:00	11914	25/01/2016 23:00	6231	906793	A375	150	231	Glo	4	968	L17-D6-S	1054	PD-0332991	0.0316367	20831
12508	21/01/2016 23:00	11914	25/01/2016 23:00	6231	906793	A375	150	231	Glo	4	969	L17-D7-S	1054	PD-0332991	0.0100053	25897
12508	21/01/2016 23:00	11914	25/01/2016 23:00	6231	906793	A375	150	231	Glo	4	970	PC2-D1-S	1034	Staurosporine	2	2484
12508	21/01/2016 23:00	11914	25/01/2016 23:00	6231	906793	A375	150	231	Glo	4	971	NC-1	4000	DMSO	NA	21692
12508	21/01/2016 23:00	11914	25/01/2016 23:00	6231	906793	A375	150	231	Glo	4	972	PC1-D1-S	1862	MG-132	4	2198
12508	21/01/2016 23:00	11914	25/01/2016 23:00	6231	906793	A375	150	231	Glo	4	973	PC1-D2-S	1862	MG-132	1	1433
12508	21/01/2016 23:00	11914	25/01/2016 23:00	6231	906793	A375	150	231	Glo	4	974	PC1-D3-S	1862	MG-132	0.25	4682
12508	21/01/2016 23:00	11914	25/01/2016 23:00	6231	906793	A375	150	231	Glo	4	975	PC1-D4-S	1862	MG-132	0.0625	19685
12508	21/01/2016 23:00	11914	25/01/2016 23:00	6231	906793	A375	150	231	Glo	4	976	PC1-D5-S	1862	MG-132	0.015625	20258
12508	21/01/2016 23:00	11914	25/01/2016 23:00	6231	906793	A375	150	231	Glo	4	977	NC-1	4000	DMSO	NA	22838
12508	21/01/2016 23:00	11914	25/01/2016 23:00	6231	906793	A375	150	231	Glo	4	985	NC-1	4000	DMSO	NA	18633
12508	21/01/2016 23:00	11914	25/01/2016 23:00	6231	906793	A375	150	231	Glo	4	1007	UN-USED	NA	NA	NA	20831
12508	21/01/2016 23:00	11914	25/01/2016 23:00	6231	906793	A375	150	231	Glo	4	1008	UN-USED	NA	NA	NA	18156
12508	21/01/2016 23:00	11914	25/01/2016 23:00	6231	906793	A375	150	231	Glo	4	1009	B	NA	NA	NA	299
12508	21/01/2016 23:00	11914	25/01/2016 23:00	6231	906793	A375	150	231	Glo	4	1010	UN-USED	NA	NA	NA	23221
12508	21/01/2016 23:00	11914	25/01/2016 23:00	6231	906793	A375	150	231	Glo	4	1011	L18-D1-S	1057	BEZ235	0.25	7166
12508	21/01/2016 23:00	11914	25/01/2016 23:00	6231	906793	A375	150	231	Glo	4	1012	L18-D2-S	1057	BEZ235	0.0790639	7071
12508	21/01/2016 23:00	11914	25/01/2016 23:00	6231	906793	A375	150	231	Glo	4	1013	L18-D3-S	1057	BEZ235	0.0250044	11753
12508	21/01/2016 23:00	11914	25/01/2016 23:00	6231	906793	A375	150	231	Glo	4	1014	L18-D4-S	1057	BEZ235	0.00790778	15627
12508	21/01/2016 23:00	11914	25/01/2016 23:00	6231	906793	A375	150	231	Glo	4	1015	L18-D5-S	1057	BEZ235	0.00250088	19016
12508	21/01/2016 23:00	11914	25/01/2016 23:00	6231	906793	A375	150	231	Glo	4	1016	L18-D6-S	1057	BEZ235	0.000790917	21883
12508	21/01/2016 23:00	11914	25/01/2016 23:00	6231	906793	A375	150	231	Glo	4	1017	L18-D7-S	1057	BEZ235	0.000250132	20067
12508	21/01/2016 23:00	11914	25/01/2016 23:00	6231	906793	A375	150	231	Glo	4	1018	NC-1	4000	DMSO	NA	18729
12508	21/01/2016 23:00	11914	25/01/2016 23:00	6231	906793	A375	150	231	Glo	4	1019	L42-D1-S	1510	Lisitinib	10	10702
12508	21/01/2016 23:00	11914	25/01/2016 23:00	6231	906793	A375	150	231	Glo	4	1020	L42-D2-S	1510	Lisitinib	3.16256	15002
12508	21/01/2016 23:00	11914	25/01/2016 23:00	6231	906793	A375	150	231	Glo	4	1021	L42-D3-S	1510	Lisitinib	1.00018	15289
12508	21/01/2016 23:00	11914	25/01/2016 23:00	6231	906793	A375	150	231	Glo	4	1022	L42-D4-S	1510	Lisitinib	0.316311	16149
12508	21/01/2016 23:00	11914	25/01/2016 23:00	6231	906793	A375	150	231	Glo	4	1023	L42-D5-S	1510	Lisitinib	0.100035	19302
12508	21/01/2016 23:00	11914	25/01/2016 23:00	6231	906793	A375	150	231	Glo	4	1024	L42-D6-S	1510	Lisitinib	0.0316367	20258
12508	21/01/2016 23:00	11914	25/01/2016 23:00	6231	906793	A375	150	231	Glo	4	1025	L42-D7-S	1510	Lisitinib	0.0100053	20163
12508	21/01/2016 23:00	11914	25/01/2016 23:00	6231	906793	A375	150	231	Glo	4	1040	NC-1	4000	DMSO	NA	14524
12508	21/01/2016 23:00	11914	25/01/2016 23:00	6231	906793	A375	150	231	Glo	4	1041	NC-1	4000	DMSO	NA	21214
12508	21/01/2016 23:00	11914	25/01/2016 23:00	6231	906793	A375	150	231	Glo	4	1042	NC-1	4000	DMSO	NA	18156
12508	21/01/2016 23:00	11914	25/01/2016 23:00	6231	906793	A375	150	231	Glo	4	1043	NC-1	4000	DMSO	NA	18825
12508	21/01/2016 23:00	11914	25/01/2016 23:00	6231	906793	A375	150	231	Glo	4	1044	PC2-D1-S	1034	Staurosporine	2	1592
12508	21/01/2016 23:00	11914	25/01/2016 23:00	6231	906793	A375	150	231	Glo	4	1045	PC1-D1-S	1862	MG-132	4	2293
12508	21/01/2016 23:00	11914	25/01/2016 23:00	6231	906793	A375	150	231	Glo	4	1046	NC-1	4000	DMSO	NA	17678
12508	21/01/2016 23:00	11914	25/01/2016 23:00	6231	906793	A375	150	231	Glo	4	1047	NC-1	4000	DMSO	NA	18251
12508	21/01/2016 23:00	11914	25/01/2016 23:00	6231	906793	A375	150	231	Glo	4	1055	UN-USED	NA	NA	NA	20067
12508	21/01/2016 23:00	11914	25/01/2016 23:00	6231	906793	A375	150	231	Glo	4	1056	UN-USED	NA	NA	NA	17869
12508	21/01/2016 23:00	11914	25/01/2016 23:00	6231	906793	A375	150	231	Glo	4	1057	B	NA	NA	NA	96
12508	21/01/2016 23:00	11914	25/01/2016 23:00	6231	906793	A375	150	231	Glo	4	1058	UN-USED	NA	NA	NA	26470
12508	21/01/2016 23:00	11914	25/01/2016 23:00	6231	906793	A375	150	231	Glo	4	1059	NC-1	4000	DMSO	NA	24559
12508	21/01/2016 23:00	11914	25/01/2016 23:00	6231	906793	A375	150	231	Glo	4	1060	L19-D1-S	1058	GDC0941	10	6402
12508	21/01/2016 23:00	11914	25/01/2016 23:00	6231	906793	A375	150	231	Glo	4	1061	L19-D2-S	1058	GDC0941	3.16256	9364
12508	21/01/2016 23:00	11914	25/01/2016 23:00	6231	906793	A375	150	231	Glo	4	1062	L19-D3-S	1058	GDC0941	1.00018	13569
12508	21/01/2016 23:00	11914	25/01/2016 23:00	6231	906793	A375	150	231	Glo	4	1063	L19-D4-S	1058	GDC0941	0.316311	23412
12508	21/01/2016 23:00	11914	25/01/2016 23:00	6231	906793	A375	150	231	Glo	4	1064	L19-D5-S	1058	GDC0941	0.100035	19971
12508	21/01/2016 23:00	11914	25/01/2016 23:00	6231	906793	A375	150	231	Glo	4	1065	L19-D6-S	1058	GDC0941	0.0316367	22934
12508	21/01/2016 23:00	11914	25/01/2016 23:00	6231	906793	A375	150	231	Glo	4	1066	L19-D7-S	1058	GDC0941	0.0100053	22552
12508	21/01/2016 23:00	11914	25/01/2016 23:00	6231	906793	A375	150	231	Glo	4	1102	NC-1	4000	DMSO	NA	22361
12508	21/01/2016 23:00	11914	25/01/2016 23:00	6231	906793	A375	150	231	Glo	4	1103	UN-USED	NA	NA	NA	23030
12508	21/01/2016 23:00	11914	25/01/2016 23:00	6231	906793	A375	150	231	Glo	4	1104	UN-USED	NA	NA	NA	18060
12508	21/01/2016 23:00	11914	25/01/2016 23:00	6231	906793	A375	150	231	Glo	4	1105	B	NA	NA	NA	191
12508	21/01/2016 23:00	11914	25/01/2016 23:00	6231	906793	A375	150	231	Glo	4	1106	UN-USED	NA	NA	NA	26279
12508	21/01/2016 23:00	11914	25/01/2016 23:00	6231	906793	A375	150	231	Glo	4	1107	NC-1	4000	DMSO	NA	20206
12508	21/01/2016 23:00	11914	25/01/2016 23:00	6231	906793	A375	150	231	Glo	4	1150	NC-1	4000	DMSO	NA	21023
12508	21/01/2016 23:00	11914	25/01/2016 23:00	6231	906793	A375	150	231	Glo	4	1151	UN-USED	NA	NA	NA	22074
12508	21/01/2016 23:00	11914	25/01/2016 23:00	6231	906793	A375	150	231	Glo	4	1152	UN-USED	NA	NA	NA	20640
12508	21/01/2016 23:00	11914	25/01/2016 23:00	6231	906793	A375	150	231	Glo	4	1153	B	NA	NA	NA	191
12508	21/01/2016 23:00	11914	25/01/2016 23:00	6231	906793	A375	150	231	Glo	4	1154	UN-USED	NA	NA	NA	24750
12508	21/01/2016 23:00	11914	25/01/2016 23:00	6231	906793	A375	150	231	Glo	4	1155	L21-D1-S	1060	PD-0325901	0.25	7071
12508	21/01/2016 23:00	11914	25/01/2016 23:00	6231	906793	A375	150	231	Glo	4	1156	L21-D2-S	1060	PD-0325901	0.0790639	6211
12508	21/01/2016 23:00	11914	25/01/2016 23:00	6231	906793	A375	150	231	Glo	4	1157	L21-D3-S	1060	PD-0325901	0.0250044	8122
12508	21/01/2016 23:00	11914	25/01/2016 23:00	6231	906793	A375	150	231	Glo	4	1158	L21-D4-S	1060	PD-0325901	0.00790778	11275
12508	21/01/2016 23:00	11914	25/01/2016 23:00	6231	906793	A375	150	231	Glo	4	1159	L21-D5-S	1060	PD-0325901	0.00250088	22361
12508	21/01/2016 23:00	11914	25/01/2016 23:00	6231	906793	A375	150	231	Glo	4	1160	L21-D6-S	1060	PD-0325901	0.000790917	20354
12508	21/01/2016 23:00	11914	25/01/2016 23:00	6231	906793	A375	150	231	Glo	4	1161	L21-D7-S	1060	PD-0325901	0.000250132	21787
12508	21/01/2016 23:00	11914	25/01/2016 23:00	6231	906793	A375	150	231	Glo	4	1162	NC-1	4000	DMSO	NA	20163
12508	21/01/2016 23:00	11914	25/01/2016 23:00	6231	906793	A375	150	231	Glo	4	1163	NC-1	4000	DMSO	NA	23125
12508	21/01/2016 23:00	11914	25/01/2016 23:00	6231	906793	A375	150	231	Glo	4	1164	PC1-D1-S	1862	MG-132	4	1911
12508	21/01/2016 23:00	11914	25/01/2016 23:00	6231	906793	A375	150	231	Glo	4	1165	PC2-D1-S	1034	Staurosporine	2	2102
12508	21/01/2016 23:00	11914	25/01/2016 23:00	6231	906793	A375	150	231	Glo	4	1166	NC-1	4000	DMSO	NA	18347
12508	21/01/2016 23:00	11914	25/01/2016 23:00	6231	906793	A375	150	231	Glo	4	1167	NC-1	4000	DMSO	NA	20449
12508	21/01/2016 23:00	11914	25/01/2016 23:00	6231	906793	A375	150	231	Glo	4	1168	NC-1	4000	DMSO	NA	23890
12508	21/01/2016 23:00	11914	25/01/2016 23:00	6231	906793	A375	150	231	Glo	4	1176	PC2-D5-S	1034	Staurosporine	0.0078125	17582
12508	21/01/2016 23:00	11914	25/01/2016 23:00	6231	906793	A375	150	231	Glo	4	1198	NC-1	4000	DMSO	NA	20067
12508	21/01/2016 23:00	11914	25/01/2016 23:00	6231	906793	A375	150	231	Glo	4	1199	UN-USED	NA	NA	NA	25706
12508	21/01/2016 23:00	11914	25/01/2016 23:00	6231	906793	A375	150	231	Glo	4	1200	UN-USED	NA	NA	NA	16149
12508	21/01/2016 23:00	11914	25/01/2016 23:00	6231	906793	A375	150	231	Glo	4	1201	B	NA	NA	NA	382
12508	21/01/2016 23:00	11914	25/01/2016 23:00	6231	906793	A375	150	231	Glo	4	1202	UN-USED	NA	NA	NA	26757
12508	21/01/2016 23:00	11914	25/01/2016 23:00	6231	906793	A375	150	231	Glo	4	1203	NC-1	4000	DMSO	NA	21405
12508	21/01/2016 23:00	11914	25/01/2016 23:00	6231	906793	A375	150	231	Glo	4	1204	PC2-D1-S	1034	Staurosporine	2	1338
12508	21/01/2016 23:00	11914	25/01/2016 23:00	6231	906793	A375	150	231	Glo	4	1205	PC2-D2-S	1034	Staurosporine	0.5	3726
12508	21/01/2016 23:00	11914	25/01/2016 23:00	6231	906793	A375	150	231	Glo	4	1206	PC2-D3-S	1034	Staurosporine	0.125	7835
12508	21/01/2016 23:00	11914	25/01/2016 23:00	6231	906793	A375	150	231	Glo	4	1207	PC2-D4-S	1034	Staurosporine	0.03125	10893
12508	21/01/2016 23:00	11914	25/01/2016 23:00	6231	906793	A375	150	231	Glo	4	1208	PC2-D5-S	1034	Staurosporine	0.0078125	15671
12508	21/01/2016 23:00	11914	25/01/2016 23:00	6231	906793	A375	150	231	Glo	4	1209	NC-1	4000	DMSO	NA	19016
12508	21/01/2016 23:00	11914	25/01/2016 23:00	6231	906793	A375	150	231	Glo	4	1224	PC2-D4-S	1034	Staurosporine	0.03125	12326
12508	21/01/2016 23:00	11914	25/01/2016 23:00	6231	906793	A375	150	231	Glo	4	1225	NC-0	NA	NA	NA	19111
12508	21/01/2016 23:00	11914	25/01/2016 23:00	6231	906793	A375	150	231	Glo	4	1226	NC-1	4000	DMSO	NA	21214
12508	21/01/2016 23:00	11914	25/01/2016 23:00	6231	906793	A375	150	231	Glo	4	1227	NC-1	4000	DMSO	NA	19589
12508	21/01/2016 23:00	11914	25/01/2016 23:00	6231	906793	A375	150	231	Glo	4	1228	NC-1	4000	DMSO	NA	20354
12508	21/01/2016 23:00	11914	25/01/2016 23:00	6231	906793	A375	150	231	Glo	4	1229	PC1-D1-S	1862	MG-132	4	2771
12508	21/01/2016 23:00	11914	25/01/2016 23:00	6231	906793	A375	150	231	Glo	4	1230	PC2-D1-S	1034	Staurosporine	2	2293
12508	21/01/2016 23:00	11914	25/01/2016 23:00	6231	906793	A375	150	231	Glo	4	1231	NC-1	4000	DMSO	NA	18729
12508	21/01/2016 23:00	11914	25/01/2016 23:00	6231	906793	A375	150	231	Glo	4	1246	NC-1	4000	DMSO	NA	20545
12508	21/01/2016 23:00	11914	25/01/2016 23:00	6231	906793	A375	150	231	Glo	4	1247	UN-USED	NA	NA	NA	21214
12508	21/01/2016 23:00	11914	25/01/2016 23:00	6231	906793	A375	150	231	Glo	4	1248	UN-USED	NA	NA	NA	23890
12508	21/01/2016 23:00	11914	25/01/2016 23:00	6231	906793	A375	150	231	Glo	4	1249	B	NA	NA	NA	96
12508	21/01/2016 23:00	11914	25/01/2016 23:00	6231	906793	A375	150	231	Glo	4	1250	UN-USED	NA	NA	NA	26661
12508	21/01/2016 23:00	11914	25/01/2016 23:00	6231	906793	A375	150	231	Glo	4	1272	PC2-D3-S	1034	Staurosporine	0.125	8504
12508	21/01/2016 23:00	11914	25/01/2016 23:00	6231	906793	A375	150	231	Glo	4	1273	NC-1	4000	DMSO	NA	18729
12508	21/01/2016 23:00	11914	25/01/2016 23:00	6231	906793	A375	150	231	Glo	4	1295	UN-USED	NA	NA	NA	26566
12508	21/01/2016 23:00	11914	25/01/2016 23:00	6231	906793	A375	150	231	Glo	4	1296	UN-USED	NA	NA	NA	18156
12508	21/01/2016 23:00	11914	25/01/2016 23:00	6231	906793	A375	150	231	Glo	4	1297	B	NA	NA	NA	191
12508	21/01/2016 23:00	11914	25/01/2016 23:00	6231	906793	A375	150	231	Glo	4	1298	UN-USED	NA	NA	NA	25992
12508	21/01/2016 23:00	11914	25/01/2016 23:00	6231	906793	A375	150	231	Glo	4	1320	PC2-D2-S	1034	Staurosporine	0.5	5351
12508	21/01/2016 23:00	11914	25/01/2016 23:00	6231	906793	A375	150	231	Glo	4	1321	NC-1	4000	DMSO	NA	20449
12508	21/01/2016 23:00	11914	25/01/2016 23:00	6231	906793	A375	150	231	Glo	4	1343	UN-USED	NA	NA	NA	22838
12508	21/01/2016 23:00	11914	25/01/2016 23:00	6231	906793	A375	150	231	Glo	4	1344	UN-USED	NA	NA	NA	16722
12508	21/01/2016 23:00	11914	25/01/2016 23:00	6231	906793	A375	150	231	Glo	4	1345	B	NA	NA	NA	382
12508	21/01/2016 23:00	11914	25/01/2016 23:00	6231	906793	A375	150	231	Glo	4	1346	UN-USED	NA	NA	NA	24654
12508	21/01/2016 23:00	11914	25/01/2016 23:00	6231	906793	A375	150	231	Glo	4	1361	NC-1	4000	DMSO	NA	25037
12508	21/01/2016 23:00	11914	25/01/2016 23:00	6231	906793	A375	150	231	Glo	4	1362	NC-1	4000	DMSO	NA	20927
12508	21/01/2016 23:00	11914	25/01/2016 23:00	6231	906793	A375	150	231	Glo	4	1363	PC2-D1-S	1034	Staurosporine	2	1720
12508	21/01/2016 23:00	11914	25/01/2016 23:00	6231	906793	A375	150	231	Glo	4	1364	PC1-D1-S	1862	MG-132	4	1433
12508	21/01/2016 23:00	11914	25/01/2016 23:00	6231	906793	A375	150	231	Glo	4	1365	NC-1	4000	DMSO	NA	21692
12508	21/01/2016 23:00	11914	25/01/2016 23:00	6231	906793	A375	150	231	Glo	4	1366	NC-1	4000	DMSO	NA	23412
12508	21/01/2016 23:00	11914	25/01/2016 23:00	6231	906793	A375	150	231	Glo	4	1367	NC-1	4000	DMSO	NA	24368
12508	21/01/2016 23:00	11914	25/01/2016 23:00	6231	906793	A375	150	231	Glo	4	1368	PC2-D1-S	1034	Staurosporine	2	1891
12508	21/01/2016 23:00	11914	25/01/2016 23:00	6231	906793	A375	150	231	Glo	4	1376	NC-1	4000	DMSO	NA	22552
12508	21/01/2016 23:00	11914	25/01/2016 23:00	6231	906793	A375	150	231	Glo	4	1391	UN-USED	NA	NA	NA	25228
12508	21/01/2016 23:00	11914	25/01/2016 23:00	6231	906793	A375	150	231	Glo	4	1392	UN-USED	NA	NA	NA	17296
12508	21/01/2016 23:00	11914	25/01/2016 23:00	6231	906793	A375	150	231	Glo	4	1393	B	NA	NA	NA	191
12508	21/01/2016 23:00	11914	25/01/2016 23:00	6231	906793	A375	150	231	Glo	4	1394	UN-USED	NA	NA	NA	27139
12508	21/01/2016 23:00	11914	25/01/2016 23:00	6231	906793	A375	150	231	Glo	4	1395	NC-1	4000	DMSO	NA	22743
12508	21/01/2016 23:00	11914	25/01/2016 23:00	6231	906793	A375	150	231	Glo	4	1396	NC-1	4000	DMSO	NA	23392
12508	21/01/2016 23:00	11914	25/01/2016 23:00	6231	906793	A375	150	231	Glo	4	1397	NC-1	4000	DMSO	NA	23890
12508	21/01/2016 23:00	11914	25/01/2016 23:00	6231	906793	A375	150	231	Glo	4	1398	NC-1	4000	DMSO	NA	25323
12508	21/01/2016 23:00	11914	25/01/2016 23:00	6231	906793	A375	150	231	Glo	4	1399	PC1-D1-S	1862	MG-132	4	1815
12508	21/01/2016 23:00	11914	25/01/2016 23:00	6231	906793	A375	150	231	Glo	4	1400	PC2-D1-S	1034	Staurosporine	2	796
12508	21/01/2016 23:00	11914	25/01/2016 23:00	6231	906793	A375	150	231	Glo	4	1401	NC-1	4000	DMSO	NA	24463
12508	21/01/2016 23:00	11914	25/01/2016 23:00	6231	906793	A375	150	231	Glo	4	1416	NC-1	4000	DMSO	NA	21596
12508	21/01/2016 23:00	11914	25/01/2016 23:00	6231	906793	A375	150	231	Glo	4	1424	NC-1	4000	DMSO	NA	20831
12508	21/01/2016 23:00	11914	25/01/2016 23:00	6231	906793	A375	150	231	Glo	4	1432	NC-1	4000	DMSO	NA	21787
12508	21/01/2016 23:00	11914	25/01/2016 23:00	6231	906793	A375	150	231	Glo	4	1433	NC-1	4000	DMSO	NA	23221
12508	21/01/2016 23:00	11914	25/01/2016 23:00	6231	906793	A375	150	231	Glo	4	1434	NC-1	4000	DMSO	NA	19494
12508	21/01/2016 23:00	11914	25/01/2016 23:00	6231	906793	A375	150	231	Glo	4	1435	PC2-D1-S	1034	Staurosporine	2	2293
12508	21/01/2016 23:00	11914	25/01/2016 23:00	6231	906793	A375	150	231	Glo	4	1436	PC1-D1-S	1862	MG-132	4	1147
12508	21/01/2016 23:00	11914	25/01/2016 23:00	6231	906793	A375	150	231	Glo	4	1437	NC-1	4000	DMSO	NA	20831
12508	21/01/2016 23:00	11914	25/01/2016 23:00	6231	906793	A375	150	231	Glo	4	1438	NC-1	4000	DMSO	NA	23412
12508	21/01/2016 23:00	11914	25/01/2016 23:00	6231	906793	A375	150	231	Glo	4	1439	UN-USED	NA	NA	NA	25514
12508	21/01/2016 23:00	11914	25/01/2016 23:00	6231	906793	A375	150	231	Glo	4	1440	UN-USED	NA	NA	NA	19494
12508	21/01/2016 23:00	11914	25/01/2016 23:00	6231	906793	A375	150	231	Glo	4	1441	UN-USED	NA	NA	NA	191
12508	21/01/2016 23:00	11914	25/01/2016 23:00	6231	906793	A375	150	231	Glo	4	1442	UN-USED	NA	NA	NA	23125
12508	21/01/2016 23:00	11914	25/01/2016 23:00	6231	906793	A375	150	231	Glo	4	1443	UN-USED	NA	NA	NA	31249
12508	21/01/2016 23:00	11914	25/01/2016 23:00	6231	906793	A375	150	231	Glo	4	1444	UN-USED	NA	NA	NA	29433
12508	21/01/2016 23:00	11914	25/01/2016 23:00	6231	906793	A375	150	231	Glo	4	1445	UN-USED	NA	NA	NA	27713
12508	21/01/2016 23:00	11914	25/01/2016 23:00	6231	906793	A375	150	231	Glo	4	1446	UN-USED	NA	NA	NA	28382
12508	21/01/2016 23:00	11914	25/01/2016 23:00	6231	906793	A375	150	231	Glo	4	1447	UN-USED	NA	NA	NA	27139
12508	21/01/2016 23:00	11914	25/01/2016 23:00	6231	906793	A375	150	231	Glo	4	1448	UN-USED	NA	NA	NA	30198
12508	21/01/2016 23:00	11914	25/01/2016 23:00	6231	906793	A375	150	231	Glo	4	1449	UN-USED	NA	NA	NA	30580
12508	21/01/2016 23:00	11914	25/01/2016 23:00	6231	906793	A375	150	231	Glo	4	1450	UN-USED	NA	NA	NA	25132
12508	21/01/2016 23:00	11914	25/01/2016 23:00	6231	906793	A375	150	231	Glo	4	1451	UN-USED	NA	NA	NA	27521
12508	21/01/2016 23:00	11914	25/01/2016 23:00	6231	906793	A375	150	231	Glo	4	1452	UN-USED	NA	NA	NA	26677
12508	21/01/2016 23:00	11914	25/01/2016 23:00	6231	906793	A375	150	231	Glo	4	1453	UN-USED	NA	NA	NA	26088
12508	21/01/2016 23:00	11914	25/01/2016 23:00	6231	906793	A375	150	231	Glo	4	1454	UN-USED	NA	NA	NA	27521
12508	21/01/2016 23:00	11914	25/01/2016 23:00	6231	906793	A375	150	231	Glo	4	1455	UN-USED	NA	NA	NA	27904
12508	21/01/2016 23:00	11914	25/01/2016 23:00	6231	906793	A375	150	231	Glo	4	1456	UN-USED	NA	NA	NA	27235
12508	21/01/2016 23:00	11914	25/01/2016 23:00	6231	906793	A375	150	231	Glo	4	1457	UN-USED	NA	NA	NA	25897
12508	21/01/2016 23:00	11914	25/01/2016 23:00	6231	906793	A375	150	231	Glo	4	1458	UN-USED	NA	NA	NA	25419
12508	21/01/2016 23:00	11914	25/01/2016 23:00	6231	906793	A375	150	231	Glo	4	1459	UN-USED	NA	NA	NA	23316
12508	21/01/2016 23:00	11914	25/01/2016 23:00	6231	906793	A375	150	231	Glo	4	1460	UN-USED	NA	NA	NA	24463
12508	21/01/2016 23:00	11914	25/01/2016 23:00	6231	906793	A375	150	231	Glo	4	1461	UN-USED	NA	NA	NA	24081
12508	21/01/2016 23:00	11914	25/01/2016 23:00	6231	906793	A375	150	231	Glo	4	1462	UN-USED	NA	NA	NA	25897
12508	21/01/2016 23:00	11914	25/01/2016 23:00	6231	906793	A375	150	231	Glo	4	1463	UN-USED	NA	NA	NA	27139
12508	21/01/2016 23:00	11914	25/01/2016 23:00	6231	906793	A375	150	231	Glo	4	1464	UN-USED	NA	NA	NA	24176
12508	21/01/2016 23:00	11914	25/01/2016 23:00	6231	906793	A375	150	231	Glo	4	1465	UN-USED	NA	NA	NA	25084
12508	21/01/2016 23:00	11914	25/01/2016 23:00	6231	906793	A375	150	231	Glo	4	1466	UN-USED	NA	NA	NA	25897
12508	21/01/2016 23:00	11914	25/01/2016 23:00	6231	906793	A375	150	231	Glo	4	1467	UN-USED	NA	NA	NA	26852
12508	21/01/2016 23:00	11914	25/01/2016 23:00	6231	906793	A375	150	231	Glo	4	1468	UN-USED	NA	NA	NA	24654
12508	21/01/2016 23:00	11914	25/01/2016 23:00	6231	906793	A375	150	231	Glo	4	1469	UN-USED	NA	NA	NA	25228
12508	21/01/2016 23:00	11914	25/01/2016 23:00	6231	906793	A375	150	231	Glo	4	1470	UN-USED	NA	NA	NA	25323
12508	21/01/2016 23:00	11914	25/01/2016 23:00	6231	906793	A375	150	231	Glo	4	1471	UN-USED	NA	NA	NA	24559
12508	21/01/2016 23:00	11914	25/01/2016 23:00	6231	906793	A375	150	231	Glo	4	1472	UN-USED	NA	NA	NA	24750
12508	21/01/2016 23:00	11914	25/01/2016 23:00	6231	906793	A375	150	231	Glo	4	1473	UN-USED	NA	NA	NA	21023
12508	21/01/2016 23:00	11914	25/01/2016 23:00	6231	906793	A375	150	231	Glo	4	1474	UN-USED	NA	NA	NA	24081
12508	21/01/2016 23:00	11914	25/01/2016 23:00	6231	906793	A375	150	231	Glo	4	1475	UN-USED	NA	NA	NA	23125
12508	21/01/2016 23:00	11914	25/01/2016 23:00	6231	906793	A375	150	231	Glo	4	1476	UN-USED	NA	NA	NA	25419
12508	21/01/2016 23:00	11914	25/01/2016 23:00	6231	906793	A375	150	231	Glo	4	1477	UN-USED	NA	NA	NA	21596
12508	21/01/2016 23:00	11914	25/01/2016 23:00	6231	906793	A375	150	231	Glo	4	1478	UN-USED	NA	NA	NA	23985
12508	21/01/2016 23:00	11914	25/01/2016 23:00	6231	906793	A375	150	231	Glo	4	1479	UN-USED	NA	NA	NA	23507
12508	21/01/2016 23:00	11914	25/01/2016 23:00	6231	906793	A375	150	231	Glo	4	1480	UN-USED	NA	NA	NA	22743
12508	21/01/2016 23:00	11914	25/01/2016 23:00	6231	906793	A375	150	231	Glo	4	1481	UN-USED	NA	NA	NA	26661
12508	21/01/2016 23:00	11914	25/01/2016 23:00	6231	906793	A375	150	231	Glo	4	1482	UN-USED	NA	NA	NA	23125
12508	21/01/2016 23:00	11914	25/01/2016 23:00	6231	906793	A375	150	231	Glo	4	1483	UN-USED	NA	NA	NA	27139
12508	21/01/2016 23:00	11914	25/01/2016 23:00	6231	906793	A375	150	231	Glo	4	1484	UN-USED	NA	NA	NA	24559
12508	21/01/2016 23:00	11914	25/01/2016 23:00	6231	906793	A375	150	231	Glo	4	1485	UN-USED	NA	NA	NA	24559
12508	21/01/2016 23:00	11914	25/01/2016 23:00	6231	906793	A375	150	231	Glo	4	1486	UN-USED	NA	NA	NA	25037
12508	21/01/2016 23:00	11914	25/01/2016 23:00	6231	906793	A375	150	231	Glo	4	1487	UN-USED	NA	NA	NA	25897
12508	21/01/2016 23:00	11914	25/01/2016 23:00	6231	906793	A375	150	231	Glo	4	1488	UN-USED	NA	NA	NA	5637
12508	21/01/2016 23:00	11914	25/01/2016 23:00	6231	906793	A375	150	231	Glo	4	1489	UN-USED	NA	NA	NA	0
12508	21/01/2016 23:00	11914	25/01/2016 23:00	6231	906793	A375	150	231	Glo	4	1490	UN-USED	NA	NA	NA	573
12508	21/01/2016 23:00	11914	25/01/2016 23:00	6231	906793	A375	150	231	Glo	4	1491	UN-USED	NA	NA	NA	9460
12508	21/01/2016 23:00	11914	25/01/2016 23:00	6231	906793	A375	150	231	Glo	4	1492	UN-USED	NA	NA	NA	12900
12508	21/01/2016 23:00	11914	25/01/2016 23:00	6231	906793	A375	150	231	Glo	4	1493	UN-USED	NA	NA	NA	14620
12508	21/01/2016 23:00	11914	25/01/2016 23:00	6231	906793	A375	150	231	Glo	4	1494	UN-USED	NA	NA	NA	18538
12508	21/01/2016 23:00	11914	25/01/2016 23:00	6231	906793	A375	150	231	Glo	4	1495	UN-USED	NA	NA	NA	11753
12508	21/01/2016 23:00	11914	25/01/2016 23:00	6231	906793	A375	150	231	Glo	4	1496	UN-USED	NA	NA	NA	14524
12508	21/01/2016 23:00	11914	25/01/2016 23:00	6231	906793	A375	150	231	Glo	4	1497	UN-USED	NA	NA	NA	13951
12508	21/01/2016 23:00	11914	25/01/2016 23:00	6231	906793	A375	150	231	Glo	4	1498	UN-USED	NA	NA	NA	15384
12508	21/01/2016 23:00	11914	25/01/2016 23:00	6231	906793	A375	150	231	Glo	4	1499	UN-USED	NA	NA	NA	15329
12508	21/01/2016 23:00	11914	25/01/2016 23:00	6231	906793	A375	150	231	Glo	4	1500	UN-USED	NA	NA	NA	17964
12508	21/01/2016 23:00	11914	25/01/2016 23:00	6231	906793	A375	150	231	Glo	4	1501	UN-USED	NA	NA	NA	16224
12508	21/01/2016 23:00	11914	25/01/2016 23:00	6231	906793	A375	150	231	Glo	4	1502	UN-USED	NA	NA	NA	13186
12508	21/01/2016 23:00	11914	25/01/2016 23:00	6231	906793	A375	150	231	Glo	4	1503	UN-USED	NA	NA	NA	16531
12508	21/01/2016 23:00	11914	25/01/2016 23:00	6231	906793	A375	150	231	Glo	4	1504	UN-USED	NA	NA	NA	16822
12508	21/01/2016 23:00	11914	25/01/2016 23:00	6231	906793	A375	150	231	Glo	4	1505	UN-USED	NA	NA	NA	19302
12508	21/01/2016 23:00	11914	25/01/2016 23:00	6231	906793	A375	150	231	Glo	4	1506	UN-USED	NA	NA	NA	18825
12508	21/01/2016 23:00	11914	25/01/2016 23:00	6231	906793	A375	150	231	Glo	4	1507	UN-USED	NA	NA	NA	18347
12508	21/01/2016 23:00	11914	25/01/2016 23:00	6231	906793	A375	150	231	Glo	4	1508	UN-USED	NA	NA	NA	17487
12508	21/01/2016 23:00	11914	25/01/2016 23:00	6231	906793	A375	150	231	Glo	4	1509	UN-USED	NA	NA	NA	16435
12508	21/01/2016 23:00	11914	25/01/2016 23:00	6231	906793	A375	150	231	Glo	4	1510	UN-USED	NA	NA	NA	20831
12508	21/01/2016 23:00	11914	25/01/2016 23:00	6231	906793	A375	150	231	Glo	4	1511	UN-USED	NA	NA	NA	20067
12508	21/01/2016 23:00	11914	25/01/2016 23:00	6231	906793	A375	150	231	Glo	4	1512	UN-USED	NA	NA	NA	19111
12508	21/01/2016 23:00	11914	25/01/2016 23:00	6231	906793	A375	150	231	Glo	4	1513	UN-USED	NA	NA	NA	20736
12508	21/01/2016 23:00	11914	25/01/2016 23:00	6231	906793	A375	150	231	Glo	4	1514	UN-USED	NA	NA	NA	17419
12508	21/01/2016 23:00	11914	25/01/2016 23:00	6231	906793	A375	150	231	Glo	4	1515	UN-USED	NA	NA	NA	16722
12508	21/01/2016 23:00	11914	25/01/2016 23:00	6231	906793	A375	150	231	Glo	4	1516	UN-USED	NA	NA	NA	18156
12508	21/01/2016 23:00	11914	25/01/2016 23:00	6231	906793	A375	150	231	Glo	4	1517	UN-USED	NA	NA	NA	19302
12508	21/01/2016 23:00	11914	25/01/2016 23:00	6231	906793	A375	150	231	Glo	4	1518	UN-USED	NA	NA	NA	19780
12508	21/01/2016 23:00	11914	25/01/2016 23:00	6231	906793	A375	150	231	Glo	4	1519	UN-USED	NA	NA	NA	16531
12508	21/01/2016 23:00	11914	25/01/2016 23:00	6231	906793	A375	150	231	Glo	4	1520	UN-USED	NA	NA	NA	20067
12508	21/01/2016 23:00	11914	25/01/2016 23:00	6231	906793	A375	150	231	Glo	4	1521	UN-USED	NA	NA	NA	18538
12508	21/01/2016 23:00	11914	25/01/2016 23:00	6231	906793	A375	150	231	Glo	4	1522	UN-USED	NA	NA	NA	17296
12508	21/01/2016 23:00	11914	25/01/2016 23:00	6231	906793	A375	150	231	Glo	4	1523	UN-USED	NA	NA	NA	19780
12508	21/01/2016 23:00	11914	25/01/2016 23:00	6231	906793	A375	150	231	Glo	4	1524	UN-USED	NA	NA	NA	18347
12508	21/01/2016 23:00	11914	25/01/2016 23:00	6231	906793	A375	150	231	Glo	4	1525	UN-USED	NA	NA	NA	19302
12508	21/01/2016 23:00	11914	25/01/2016 23:00	6231	906793	A375	150	231	Glo	4	1526	UN-USED	NA	NA	NA	17104
12508	21/01/2016 23:00	11914	25/01/2016 23:00	6231	906793	A375	150	231	Glo	4	1527	UN-USED	NA	NA	NA	18156
12508	21/01/2016 23:00	11914	25/01/2016 23:00	6231	906793	A375	150	231	Glo	4	1528	UN-USED	NA	NA	NA	15098
12508	21/01/2016 23:00	11914	25/01/2016 23:00	6231	906793	A375	150	231	Glo	4	1529	UN-USED	NA	NA	NA	18347
12508	21/01/2016 23:00	11914	25/01/2016 23:00	6231	906793	A375	150	231	Glo	4	1530	UN-USED	NA	NA	NA	18156
12508	21/01/2016 23:00	11914	25/01/2016 23:00	6231	906793	A375	150	231	Glo	4	1531	UN-USED	NA	NA	NA	20449
12508	21/01/2016 23:00	11914	25/01/2016 23:00	6231	906793	A375	150	231	Glo	4	1532	UN-USED	NA	NA	NA	17391
12508	21/01/2016 23:00	11914	25/01/2016 23:00	6231	906793	A375	150	231	Glo	4	1533	UN-USED	NA	NA	NA	14906
12508	21/01/2016 23:00	11914	25/01/2016 23:00	6231	906793	A375	150	231	Glo	4	1534	UN-USED	NA	NA	NA	11180
12508	21/01/2016 23:00	11914	25/01/2016 23:00	6231	906793	A375	150	231	Glo	4	1535	UN-USED	NA	NA	NA	3917
12508	21/01/2016 23:00	11914	25/01/2016 23:00	6231	906793	A375	150	231	Glo	4	1536	UN-USED	NA	NA	NA	287
12510	21/01/2016 23:00	11886	25/01/2016 23:00	6231	906793	A375	150	231	Glo	4	1	UN-USED	NA	NA	NA	0
12510	21/01/2016 23:00	11886	25/01/2016 23:00	6231	906793	A375	150	231	Glo	4	2	UN-USED	NA	NA	NA	382
12510	21/01/2016 23:00	11886	25/01/2016 23:00	6231	906793	A375	150	231	Glo	4	3	UN-USED	NA	NA	NA	5064
12510	21/01/2016 23:00	11886	25/01/2016 23:00	6231	906793	A375	150	231	Glo	4	4	UN-USED	NA	NA	NA	11849
12510	21/01/2016 23:00	11886	25/01/2016 23:00	6231	906793	A375	150	231	Glo	4	5	UN-USED	NA	NA	NA	14620
12510	21/01/2016 23:00	11886	25/01/2016 23:00	6231	906793	A375	150	231	Glo	4	6	UN-USED	NA	NA	NA	16053
12510	21/01/2016 23:00	11886	25/01/2016 23:00	6231	906793	A375	150	231	Glo	4	7	UN-USED	NA	NA	NA	18347
12510	21/01/2016 23:00	11886	25/01/2016 23:00	6231	906793	A375	150	231	Glo	4	8	UN-USED	NA	NA	NA	16149
12510	21/01/2016 23:00	11886	25/01/2016 23:00	6231	906793	A375	150	231	Glo	4	9	UN-USED	NA	NA	NA	16244
12510	21/01/2016 23:00	11886	25/01/2016 23:00	6231	906793	A375	150	231	Glo	4	10	UN-USED	NA	NA	NA	19016
12510	21/01/2016 23:00	11886	25/01/2016 23:00	6231	906793	A375	150	231	Glo	4	11	UN-USED	NA	NA	NA	16340
12510	21/01/2016 23:00	11886	25/01/2016 23:00	6231	906793	A375	150	231	Glo	4	12	UN-USED	NA	NA	NA	17487
12510	21/01/2016 23:00	11886	25/01/2016 23:00	6231	906793	A375	150	231	Glo	4	13	UN-USED	NA	NA	NA	17200
12510	21/01/2016 23:00	11886	25/01/2016 23:00	6231	906793	A375	150	231	Glo	4	14	UN-USED	NA	NA	NA	16244
12510	21/01/2016 23:00	11886	25/01/2016 23:00	6231	906793	A375	150	231	Glo	4	15	UN-USED	NA	NA	NA	18825
12510	21/01/2016 23:00	11886	25/01/2016 23:00	6231	906793	A375	150	231	Glo	4	16	UN-USED	NA	NA	NA	19685
12510	21/01/2016 23:00	11886	25/01/2016 23:00	6231	906793	A375	150	231	Glo	4	17	UN-USED	NA	NA	NA	19780
12510	21/01/2016 23:00	11886	25/01/2016 23:00	6231	906793	A375	150	231	Glo	4	18	UN-USED	NA	NA	NA	17104
12510	21/01/2016 23:00	11886	25/01/2016 23:00	6231	906793	A375	150	231	Glo	4	19	UN-USED	NA	NA	NA	15289
12510	21/01/2016 23:00	11886	25/01/2016 23:00	6231	906793	A375	150	231	Glo	4	20	UN-USED	NA	NA	NA	17678
12510	21/01/2016 23:00	11886	25/01/2016 23:00	6231	906793	A375	150	231	Glo	4	21	UN-USED	NA	NA	NA	17200
12510	21/01/2016 23:00	11886	25/01/2016 23:00	6231	906793	A375	150	231	Glo	4	22	UN-USED	NA	NA	NA	20736
12510	21/01/2016 23:00	11886	25/01/2016 23:00	6231	906793	A375	150	231	Glo	4	23	UN-USED	NA	NA	NA	22361
12510	21/01/2016 23:00	11886	25/01/2016 23:00	6231	906793	A375	150	231	Glo	4	24	UN-USED	NA	NA	NA	16531
12510	21/01/2016 23:00	11886	25/01/2016 23:00	6231	906793	A375	150	231	Glo	4	25	UN-USED	NA	NA	NA	16340
12510	21/01/2016 23:00	11886	25/01/2016 23:00	6231	906793	A375	150	231	Glo	4	26	UN-USED	NA	NA	NA	17869
12510	21/01/2016 23:00	11886	25/01/2016 23:00	6231	906793	A375	150	231	Glo	4	27	UN-USED	NA	NA	NA	17296
12510	21/01/2016 23:00	11886	25/01/2016 23:00	6231	906793	A375	150	231	Glo	4	28	UN-USED	NA	NA	NA	14715
12510	21/01/2016 23:00	11886	25/01/2016 23:00	6231	906793	A375	150	231	Glo	4	29	UN-USED	NA	NA	NA	15098
12510	21/01/2016 23:00	11886	25/01/2016 23:00	6231	906793	A375	150	231	Glo	4	30	UN-USED	NA	NA	NA	15767
12510	21/01/2016 23:00	11886	25/01/2016 23:00	6231	906793	A375	150	231	Glo	4	31	UN-USED	NA	NA	NA	20067
12510	21/01/2016 23:00	11886	25/01/2016 23:00	6231	906793	A375	150	231	Glo	4	32	UN-USED	NA	NA	NA	14811
12510	21/01/2016 23:00	11886	25/01/2016 23:00	6231	906793	A375	150	231	Glo	4	33	UN-USED	NA	NA	NA	17104
12510	21/01/2016 23:00	11886	25/01/2016 23:00	6231	906793	A375	150	231	Glo	4	34	UN-USED	NA	NA	NA	16244
12510	21/01/2016 23:00	11886	25/01/2016 23:00	6231	906793	A375	150	231	Glo	4	35	UN-USED	NA	NA	NA	15767
12510	21/01/2016 23:00	11886	25/01/2016 23:00	6231	906793	A375	150	231	Glo	4	36	UN-USED	NA	NA	NA	17200
12510	21/01/2016 23:00	11886	25/01/2016 23:00	6231	906793	A375	150	231	Glo	4	37	UN-USED	NA	NA	NA	16424
12510	21/01/2016 23:00	11886	25/01/2016 23:00	6231	906793	A375	150	231	Glo	4	38	UN-USED	NA	NA	NA	17582
12510	21/01/2016 23:00	11886	25/01/2016 23:00	6231	906793	A375	150	231	Glo	4	39	UN-USED	NA	NA	NA	16627
12510	21/01/2016 23:00	11886	25/01/2016 23:00	6231	906793	A375	150	231	Glo	4	40	UN-USED	NA	NA	NA	17869
12510	21/01/2016 23:00	11886	25/01/2016 23:00	6231	906793	A375	150	231	Glo	4	41	UN-USED	NA	NA	NA	16149
12510	21/01/2016 23:00	11886	25/01/2016 23:00	6231	906793	A375	150	231	Glo	4	42	UN-USED	NA	NA	NA	15098
12510	21/01/2016 23:00	11886	25/01/2016 23:00	6231	906793	A375	150	231	Glo	4	43	UN-USED	NA	NA	NA	14906
12510	21/01/2016 23:00	11886	25/01/2016 23:00	6231	906793	A375	150	231	Glo	4	44	UN-USED	NA	NA	NA	14906
12510	21/01/2016 23:00	11886	25/01/2016 23:00	6231	906793	A375	150	231	Glo	4	45	UN-USED	NA	NA	NA	12135
12510	21/01/2016 23:00	11886	25/01/2016 23:00	6231	906793	A375	150	231	Glo	4	46	UN-USED	NA	NA	NA	8217
12510	21/01/2016 23:00	11886	25/01/2016 23:00	6231	906793	A375	150	231	Glo	4	47	UN-USED	NA	NA	NA	3726
12510	21/01/2016 23:00	11886	25/01/2016 23:00	6231	906793	A375	150	231	Glo	4	48	UN-USED	NA	NA	NA	382
12510	21/01/2016 23:00	11886	25/01/2016 23:00	6231	906793	A375	150	231	Glo	4	49	UN-USED	NA	NA	NA	191
12510	21/01/2016 23:00	11886	25/01/2016 23:00	6231	906793	A375	150	231	Glo	4	50	UN-USED	NA	NA	NA	17964
12510	21/01/2016 23:00	11886	25/01/2016 23:00	6231	906793	A375	150	231	Glo	4	51	UN-USED	NA	NA	NA	25514
12510	21/01/2016 23:00	11886	25/01/2016 23:00	6231	906793	A375	150	231	Glo	4	52	UN-USED	NA	NA	NA	26661
12510	21/01/2016 23:00	11886	25/01/2016 23:00	6231	906793	A375	150	231	Glo	4	53	UN-USED	NA	NA	NA	24081
12510	21/01/2016 23:00	11886	25/01/2016 23:00	6231	906793	A375	150	231	Glo	4	54	UN-USED	NA	NA	NA	23699
12510	21/01/2016 23:00	11886	25/01/2016 23:00	6231	906793	A375	150	231	Glo	4	55	UN-USED	NA	NA	NA	22169
12510	21/01/2016 23:00	11886	25/01/2016 23:00	6231	906793	A375	150	231	Glo	4	56	UN-USED	NA	NA	NA	26279
12510	21/01/2016 23:00	11886	25/01/2016 23:00	6231	906793	A375	150	231	Glo	4	57	UN-USED	NA	NA	NA	23699
12510	21/01/2016 23:00	11886	25/01/2016 23:00	6231	906793	A375	150	231	Glo	4	58	UN-USED	NA	NA	NA	24368
12510	21/01/2016 23:00	11886	25/01/2016 23:00	6231	906793	A375	150	231	Glo	4	59	UN-USED	NA	NA	NA	24941
12510	21/01/2016 23:00	11886	25/01/2016 23:00	6231	906793	A375	150	231	Glo	4	60	UN-USED	NA	NA	NA	23507
12510	21/01/2016 23:00	11886	25/01/2016 23:00	6231	906793	A375	150	231	Glo	4	61	UN-USED	NA	NA	NA	23603
12510	21/01/2016 23:00	11886	25/01/2016 23:00	6231	906793	A375	150	231	Glo	4	62	UN-USED	NA	NA	NA	22934
12510	21/01/2016 23:00	11886	25/01/2016 23:00	6231	906793	A375	150	231	Glo	4	63	UN-USED	NA	NA	NA	22074
12510	21/01/2016 23:00	11886	25/01/2016 23:00	6231	906793	A375	150	231	Glo	4	64	UN-USED	NA	NA	NA	22838
12510	21/01/2016 23:00	11886	25/01/2016 23:00	6231	906793	A375	150	231	Glo	4	65	UN-USED	NA	NA	NA	21978
12510	21/01/2016 23:00	11886	25/01/2016 23:00	6231	906793	A375	150	231	Glo	4	66	UN-USED	NA	NA	NA	22552
12510	21/01/2016 23:00	11886	25/01/2016 23:00	6231	906793	A375	150	231	Glo	4	67	UN-USED	NA	NA	NA	22934
12510	21/01/2016 23:00	11886	25/01/2016 23:00	6231	906793	A375	150	231	Glo	4	68	UN-USED	NA	NA	NA	21023
12510	21/01/2016 23:00	11886	25/01/2016 23:00	6231	906793	A375	150	231	Glo	4	69	UN-USED	NA	NA	NA	23794
12510	21/01/2016 23:00	11886	25/01/2016 23:00	6231	906793	A375	150	231	Glo	4	70	UN-USED	NA	NA	NA	23125
12510	21/01/2016 23:00	11886	25/01/2016 23:00	6231	906793	A375	150	231	Glo	4	71	UN-USED	NA	NA	NA	21500
12510	21/01/2016 23:00	11886	25/01/2016 23:00	6231	906793	A375	150	231	Glo	4	72	UN-USED	NA	NA	NA	21500
12510	21/01/2016 23:00	11886	25/01/2016 23:00	6231	906793	A375	150	231	Glo	4	73	UN-USED	NA	NA	NA	21692
12510	21/01/2016 23:00	11886	25/01/2016 23:00	6231	906793	A375	150	231	Glo	4	74	UN-USED	NA	NA	NA	26661
12510	21/01/2016 23:00	11886	25/01/2016 23:00	6231	906793	A375	150	231	Glo	4	75	UN-USED	NA	NA	NA	23221
12510	21/01/2016 23:00	11886	25/01/2016 23:00	6231	906793	A375	150	231	Glo	4	76	UN-USED	NA	NA	NA	19971
12510	21/01/2016 23:00	11886	25/01/2016 23:00	6231	906793	A375	150	231	Glo	4	77	UN-USED	NA	NA	NA	25706
12510	21/01/2016 23:00	11886	25/01/2016 23:00	6231	906793	A375	150	231	Glo	4	78	UN-USED	NA	NA	NA	24176
12510	21/01/2016 23:00	11886	25/01/2016 23:00	6231	906793	A375	150	231	Glo	4	79	UN-USED	NA	NA	NA	20354
12510	21/01/2016 23:00	11886	25/01/2016 23:00	6231	906793	A375	150	231	Glo	4	80	UN-USED	NA	NA	NA	23699
12510	21/01/2016 23:00	11886	25/01/2016 23:00	6231	906793	A375	150	231	Glo	4	81	UN-USED	NA	NA	NA	19207
12510	21/01/2016 23:00	11886	25/01/2016 23:00	6231	906793	A375	150	231	Glo	4	82	UN-USED	NA	NA	NA	22074
12510	21/01/2016 23:00	11886	25/01/2016 23:00	6231	906793	A375	150	231	Glo	4	83	UN-USED	NA	NA	NA	22838
12510	21/01/2016 23:00	11886	25/01/2016 23:00	6231	906793	A375	150	231	Glo	4	84	UN-USED	NA	NA	NA	22743
12510	21/01/2016 23:00	11886	25/01/2016 23:00	6231	906793	A375	150	231	Glo	4	85	UN-USED	NA	NA	NA	19494
12510	21/01/2016 23:00	11886	25/01/2016 23:00	6231	906793	A375	150	231	Glo	4	86	UN-USED	NA	NA	NA	20258
12510	21/01/2016 23:00	11886	25/01/2016 23:00	6231	906793	A375	150	231	Glo	4	87	UN-USED	NA	NA	NA	24272
12510	21/01/2016 23:00	11886	25/01/2016 23:00	6231	906793	A375	150	231	Glo	4	88	UN-USED	NA	NA	NA	23125
12510	21/01/2016 23:00	11886	25/01/2016 23:00	6231	906793	A375	150	231	Glo	4	89	UN-USED	NA	NA	NA	20306
12510	21/01/2016 23:00	11886	25/01/2016 23:00	6231	906793	A375	150	231	Glo	4	90	UN-USED	NA	NA	NA	19494
12510	21/01/2016 23:00	11886	25/01/2016 23:00	6231	906793	A375	150	231	Glo	4	91	UN-USED	NA	NA	NA	22934
12510	21/01/2016 23:00	11886	25/01/2016 23:00	6231	906793	A375	150	231	Glo	4	92	UN-USED	NA	NA	NA	22074
12510	21/01/2016 23:00	11886	25/01/2016 23:00	6231	906793	A375	150	231	Glo	4	93	UN-USED	NA	NA	NA	23985
12510	21/01/2016 23:00	11886	25/01/2016 23:00	6231	906793	A375	150	231	Glo	4	94	UN-USED	NA	NA	NA	22265
12510	21/01/2016 23:00	11886	25/01/2016 23:00	6231	906793	A375	150	231	Glo	4	95	UN-USED	NA	NA	NA	23221
12510	21/01/2016 23:00	11886	25/01/2016 23:00	6231	906793	A375	150	231	Glo	4	96	UN-USED	NA	NA	NA	8026
12510	21/01/2016 23:00	11886	25/01/2016 23:00	6231	906793	A375	150	231	Glo	4	97	B	NA	NA	NA	0
12510	21/01/2016 23:00	11886	25/01/2016 23:00	6231	906793	A375	150	231	Glo	4	98	UN-USED	NA	NA	NA	21309
12510	21/01/2016 23:00	11886	25/01/2016 23:00	6231	906793	A375	150	231	Glo	4	99	NC-1	4000	DMSO	NA	21214
12510	21/01/2016 23:00	11886	25/01/2016 23:00	6231	906793	A375	150	231	Glo	4	100	NC-1	4000	DMSO	NA	19589
12510	21/01/2016 23:00	11886	25/01/2016 23:00	6231	906793	A375	150	231	Glo	4	101	PC2-D1-S	1034	Staurosporine	2	796
12510	21/01/2016 23:00	11886	25/01/2016 23:00	6231	906793	A375	150	231	Glo	4	102	PC1-D1-S	1862	MG-132	4	697
12510	21/01/2016 23:00	11886	25/01/2016 23:00	6231	906793	A375	150	231	Glo	4	103	NC-1	4000	DMSO	NA	20354
12510	21/01/2016 23:00	11886	25/01/2016 23:00	6231	906793	A375	150	231	Glo	4	104	NC-1	4000	DMSO	NA	20163
12510	21/01/2016 23:00	11886	25/01/2016 23:00	6231	906793	A375	150	231	Glo	4	105	NC-1	4000	DMSO	NA	19685
12510	21/01/2016 23:00	11886	25/01/2016 23:00	6231	906793	A375	150	231	Glo	4	113	NC-1	4000	DMSO	NA	23030
12510	21/01/2016 23:00	11886	25/01/2016 23:00	6231	906793	A375	150	231	Glo	4	121	NC-1	4000	DMSO	NA	19971
12510	21/01/2016 23:00	11886	25/01/2016 23:00	6231	906793	A375	150	231	Glo	4	136	NC-1	4000	DMSO	NA	18251
12510	21/01/2016 23:00	11886	25/01/2016 23:00	6231	906793	A375	150	231	Glo	4	137	PC1-D1-S	1862	MG-132	4	1294
12510	21/01/2016 23:00	11886	25/01/2016 23:00	6231	906793	A375	150	231	Glo	4	138	PC2-D1-S	1034	Staurosporine	2	764
12510	21/01/2016 23:00	11886	25/01/2016 23:00	6231	906793	A375	150	231	Glo	4	139	NC-1	4000	DMSO	NA	18825
12510	21/01/2016 23:00	11886	25/01/2016 23:00	6231	906793	A375	150	231	Glo	4	140	NC-1	4000	DMSO	NA	21883
12510	21/01/2016 23:00	11886	25/01/2016 23:00	6231	906793	A375	150	231	Glo	4	141	NC-1	4000	DMSO	NA	21978
12510	21/01/2016 23:00	11886	25/01/2016 23:00	6231	906793	A375	150	231	Glo	4	142	NC-1	4000	DMSO	NA	21405
12510	21/01/2016 23:00	11886	25/01/2016 23:00	6231	906793	A375	150	231	Glo	4	143	UN-USED	NA	NA	NA	26088
12510	21/01/2016 23:00	11886	25/01/2016 23:00	6231	906793	A375	150	231	Glo	4	144	UN-USED	NA	NA	NA	11180
12510	21/01/2016 23:00	11886	25/01/2016 23:00	6231	906793	A375	150	231	Glo	4	145	B	NA	NA	NA	287
12510	21/01/2016 23:00	11886	25/01/2016 23:00	6231	906793	A375	150	231	Glo	4	146	UN-USED	NA	NA	NA	21978
12510	21/01/2016 23:00	11886	25/01/2016 23:00	6231	906793	A375	150	231	Glo	4	147	L1-D1-S	1003	Camptothecin	0.1	2675
12510	21/01/2016 23:00	11886	25/01/2016 23:00	6231	906793	A375	150	231	Glo	4	148	L1-D2-S	1003	Camptothecin	0.0316256	3249
12510	21/01/2016 23:00	11886	25/01/2016 23:00	6231	906793	A375	150	231	Glo	4	149	L1-D3-S	1003	Camptothecin	0.0100018	5637
12510	21/01/2016 23:00	11886	25/01/2016 23:00	6231	906793	A375	150	231	Glo	4	150	L1-D4-S	1003	Camptothecin	0.00316311	15767
12510	21/01/2016 23:00	11886	25/01/2016 23:00	6231	906793	A375	150	231	Glo	4	151	L1-D5-S	1003	Camptothecin	0.00100035	20736
12510	21/01/2016 23:00	11886	25/01/2016 23:00	6231	906793	A375	150	231	Glo	4	152	L1-D6-S	1003	Camptothecin	0.000316367	16913
12510	21/01/2016 23:00	11886	25/01/2016 23:00	6231	906793	A375	150	231	Glo	4	153	L1-D7-S	1003	Camptothecin	0.000100053	19494
12510	21/01/2016 23:00	11886	25/01/2016 23:00	6231	906793	A375	150	231	Glo	4	161	NC-1	4000	DMSO	NA	19111
12510	21/01/2016 23:00	11886	25/01/2016 23:00	6231	906793	A375	150	231	Glo	4	169	PC1-D1-S	1862	MG-132	4	1338
12510	21/01/2016 23:00	11886	25/01/2016 23:00	6231	906793	A375	150	231	Glo	4	170	NC-1	4000	DMSO	NA	20449
12510	21/01/2016 23:00	11886	25/01/2016 23:00	6231	906793	A375	150	231	Glo	4	171	NC-1	4000	DMSO	NA	22074
12510	21/01/2016 23:00	11886	25/01/2016 23:00	6231	906793	A375	150	231	Glo	4	172	NC-1	4000	DMSO	NA	17220
12510	21/01/2016 23:00	11886	25/01/2016 23:00	6231	906793	A375	150	231	Glo	4	173	PC2-D1-S	1034	Staurosporine	2	2580
12510	21/01/2016 23:00	11886	25/01/2016 23:00	6231	906793	A375	150	231	Glo	4	174	PC1-D1-S	1862	MG-132	4	1529
12510	21/01/2016 23:00	11886	25/01/2016 23:00	6231	906793	A375	150	231	Glo	4	175	NC-1	4000	DMSO	NA	18825
12510	21/01/2016 23:00	11886	25/01/2016 23:00	6231	906793	A375	150	231	Glo	4	176	NC-1	4000	DMSO	NA	17678
12510	21/01/2016 23:00	11886	25/01/2016 23:00	6231	906793	A375	150	231	Glo	4	191	UN-USED	NA	NA	NA	20449
12510	21/01/2016 23:00	11886	25/01/2016 23:00	6231	906793	A375	150	231	Glo	4	192	UN-USED	NA	NA	NA	16531
12510	21/01/2016 23:00	11886	25/01/2016 23:00	6231	906793	A375	150	231	Glo	4	193	B	NA	NA	NA	0
12510	21/01/2016 23:00	11886	25/01/2016 23:00	6231	906793	A375	150	231	Glo	4	194	UN-USED	NA	NA	NA	25419
12510	21/01/2016 23:00	11886	25/01/2016 23:00	6231	906793	A375	150	231	Glo	4	195	L2-D1-S	1004	Vinblastine	0.1	6020
12510	21/01/2016 23:00	11886	25/01/2016 23:00	6231	906793	A375	150	231	Glo	4	196	L2-D2-S	1004	Vinblastine	0.0316256	4873
12510	21/01/2016 23:00	11886	25/01/2016 23:00	6231	906793	A375	150	231	Glo	4	197	L2-D3-S	1004	Vinblastine	0.0100018	6784
12510	21/01/2016 23:00	11886	25/01/2016 23:00	6231	906793	A375	150	231	Glo	4	198	L2-D4-S	1004	Vinblastine	0.00316311	9364
12510	21/01/2016 23:00	11886	25/01/2016 23:00	6231	906793	A375	150	231	Glo	4	199	L2-D5-S	1004	Vinblastine	0.00100035	20927
12510	21/01/2016 23:00	11886	25/01/2016 23:00	6231	906793	A375	150	231	Glo	4	200	L2-D6-S	1004	Vinblastine	0.000316367	16244
12510	21/01/2016 23:00	11886	25/01/2016 23:00	6231	906793	A375	150	231	Glo	4	201	L2-D7-S	1004	Vinblastine	0.000100053	20163
12510	21/01/2016 23:00	11886	25/01/2016 23:00	6231	906793	A375	150	231	Glo	4	216	NC-1	4000	DMSO	NA	19780
12510	21/01/2016 23:00	11886	25/01/2016 23:00	6231	906793	A375	150	231	Glo	4	217	PC1-D2-S	1862	MG-132	1	896
12510	21/01/2016 23:00	11886	25/01/2016 23:00	6231	906793	A375	150	231	Glo	4	239	UN-USED	NA	NA	NA	26088
12510	21/01/2016 23:00	11886	25/01/2016 23:00	6231	906793	A375	150	231	Glo	4	240	UN-USED	NA	NA	NA	19111
12510	21/01/2016 23:00	11886	25/01/2016 23:00	6231	906793	A375	150	231	Glo	4	241	B	NA	NA	NA	287
12510	21/01/2016 23:00	11886	25/01/2016 23:00	6231	906793	A375	150	231	Glo	4	242	UN-USED	NA	NA	NA	23603
12510	21/01/2016 23:00	11886	25/01/2016 23:00	6231	906793	A375	150	231	Glo	4	243	L3-D1-S	1005	Cisplatin	6	13091
12510	21/01/2016 23:00	11886	25/01/2016 23:00	6231	906793	A375	150	231	Glo	4	244	L3-D2-S	1005	Cisplatin	1.89753	12040
12510	21/01/2016 23:00	11886	25/01/2016 23:00	6231	906793	A375	150	231	Glo	4	245	L3-D3-S	1005	Cisplatin	0.600105	17009
12510	21/01/2016 23:00	11886	25/01/2016 23:00	6231	906793	A375	150	231	Glo	4	246	L3-D4-S	1005	Cisplatin	0.189787	19398
12510	21/01/2016 23:00	11886	25/01/2016 23:00	6231	906793	A375	150	231	Glo	4	247	L3-D5-S	1005	Cisplatin	0.0600211	21214
12510	21/01/2016 23:00	11886	25/01/2016 23:00	6231	906793	A375	150	231	Glo	4	248	L3-D6-S	1005	Cisplatin	0.018982	19876
12510	21/01/2016 23:00	11886	25/01/2016 23:00	6231	906793	A375	150	231	Glo	4	249	L3-D7-S	1005	Cisplatin	0.00600316	18156
12510	21/01/2016 23:00	11886	25/01/2016 23:00	6231	906793	A375	150	231	Glo	4	250	L28-D1-S	1091	BMS-536924	10	5064
12510	21/01/2016 23:00	11886	25/01/2016 23:00	6231	906793	A375	150	231	Glo	4	251	L28-D2-S	1091	BMS-536924	3.16256	7740
12510	21/01/2016 23:00	11886	25/01/2016 23:00	6231	906793	A375	150	231	Glo	4	252	L28-D3-S	1091	BMS-536924	1.00018	15289
12510	21/01/2016 23:00	11886	25/01/2016 23:00	6231	906793	A375	150	231	Glo	4	253	L28-D4-S	1091	BMS-536924	0.316311	17773
12510	21/01/2016 23:00	11886	25/01/2016 23:00	6231	906793	A375	150	231	Glo	4	254	L28-D5-S	1091	BMS-536924	0.100035	16340
12510	21/01/2016 23:00	11886	25/01/2016 23:00	6231	906793	A375	150	231	Glo	4	255	L28-D6-S	1091	BMS-536924	0.0316367	19589
12510	21/01/2016 23:00	11886	25/01/2016 23:00	6231	906793	A375	150	231	Glo	4	256	L28-D7-S	1091	BMS-536924	0.0100053	17487
12510	21/01/2016 23:00	11886	25/01/2016 23:00	6231	906793	A375	150	231	Glo	4	264	NC-1	4000	DMSO	NA	18633
12510	21/01/2016 23:00	11886	25/01/2016 23:00	6231	906793	A375	150	231	Glo	4	265	PC1-D3-S	1862	MG-132	0.25	3249
12510	21/01/2016 23:00	11886	25/01/2016 23:00	6231	906793	A375	150	231	Glo	4	287	UN-USED	NA	NA	NA	22838
12510	21/01/2016 23:00	11886	25/01/2016 23:00	6231	906793	A375	150	231	Glo	4	288	UN-USED	NA	NA	NA	19971
12510	21/01/2016 23:00	11886	25/01/2016 23:00	6231	906793	A375	150	231	Glo	4	289	B	NA	NA	NA	191
12510	21/01/2016 23:00	11886	25/01/2016 23:00	6231	906793	A375	150	231	Glo	4	290	UN-USED	NA	NA	NA	21883
12510	21/01/2016 23:00	11886	25/01/2016 23:00	6231	906793	A375	150	231	Glo	4	291	NC-1	4000	DMSO	NA	19494
12510	21/01/2016 23:00	11886	25/01/2016 23:00	6231	906793	A375	150	231	Glo	4	292	L4-D1-S	1006	Cytarabine	2	6115
12510	21/01/2016 23:00	11886	25/01/2016 23:00	6231	906793	A375	150	231	Glo	4	293	L4-D2-S	1006	Cytarabine	0.632511	6402
12510	21/01/2016 23:00	11886	25/01/2016 23:00	6231	906793	A375	150	231	Glo	4	294	L4-D3-S	1006	Cytarabine	0.200035	11944
12510	21/01/2016 23:00	11886	25/01/2016 23:00	6231	906793	A375	150	231	Glo	4	295	L4-D4-S	1006	Cytarabine	0.0632622	15862
12510	21/01/2016 23:00	11886	25/01/2016 23:00	6231	906793	A375	150	231	Glo	4	296	L4-D5-S	1006	Cytarabine	0.020007	19111
12510	21/01/2016 23:00	11886	25/01/2016 23:00	6231	906793	A375	150	231	Glo	4	297	L4-D6-S	1006	Cytarabine	0.00632733	19780
12510	21/01/2016 23:00	11886	25/01/2016 23:00	6231	906793	A375	150	231	Glo	4	298	L4-D7-S	1006	Cytarabine	0.00200105	19302
12510	21/01/2016 23:00	11886	25/01/2016 23:00	6231	906793	A375	150	231	Glo	4	306	NC-1	4000	DMSO	NA	17678
12510	21/01/2016 23:00	11886	25/01/2016 23:00	6231	906793	A375	150	231	Glo	4	307	PC1-D1-S	1862	MG-132	4	2006
12510	21/01/2016 23:00	11886	25/01/2016 23:00	6231	906793	A375	150	231	Glo	4	308	PC2-D1-S	1034	Staurosporine	2	1911
12510	21/01/2016 23:00	11886	25/01/2016 23:00	6231	906793	A375	150	231	Glo	4	309	NC-1	4000	DMSO	NA	17104
12510	21/01/2016 23:00	11886	25/01/2016 23:00	6231	906793	A375	150	231	Glo	4	310	NC-1	4000	DMSO	NA	18215
12510	21/01/2016 23:00	11886	25/01/2016 23:00	6231	906793	A375	150	231	Glo	4	311	NC-1	4000	DMSO	NA	20258
12510	21/01/2016 23:00	11886	25/01/2016 23:00	6231	906793	A375	150	231	Glo	4	312	NC-0	NA	NA	NA	21405
12510	21/01/2016 23:00	11886	25/01/2016 23:00	6231	906793	A375	150	231	Glo	4	313	PC1-D4-S	1862	MG-132	0.0625	20449
12510	21/01/2016 23:00	11886	25/01/2016 23:00	6231	906793	A375	150	231	Glo	4	328	NC-1	4000	DMSO	NA	14046
12510	21/01/2016 23:00	11886	25/01/2016 23:00	6231	906793	A375	150	231	Glo	4	329	PC1-D5-S	1862	MG-132	0.015625	17869
12510	21/01/2016 23:00	11886	25/01/2016 23:00	6231	906793	A375	150	231	Glo	4	330	PC1-D4-S	1862	MG-132	0.0625	21309
12510	21/01/2016 23:00	11886	25/01/2016 23:00	6231	906793	A375	150	231	Glo	4	331	PC1-D3-S	1862	MG-132	0.25	2771
12510	21/01/2016 23:00	11886	25/01/2016 23:00	6231	906793	A375	150	231	Glo	4	332	PC1-D2-S	1862	MG-132	1	1529
12510	21/01/2016 23:00	11886	25/01/2016 23:00	6231	906793	A375	150	231	Glo	4	333	PC1-D1-S	1862	MG-132	4	995
12510	21/01/2016 23:00	11886	25/01/2016 23:00	6231	906793	A375	150	231	Glo	4	334	NC-1	4000	DMSO	NA	18729
12510	21/01/2016 23:00	11886	25/01/2016 23:00	6231	906793	A375	150	231	Glo	4	335	UN-USED	NA	NA	NA	20640
12510	21/01/2016 23:00	11886	25/01/2016 23:00	6231	906793	A375	150	231	Glo	4	336	UN-USED	NA	NA	NA	21692
12510	21/01/2016 23:00	11886	25/01/2016 23:00	6231	906793	A375	150	231	Glo	4	337	B	NA	NA	NA	191
12510	21/01/2016 23:00	11886	25/01/2016 23:00	6231	906793	A375	150	231	Glo	4	338	UN-USED	NA	NA	NA	21301
12510	21/01/2016 23:00	11886	25/01/2016 23:00	6231	906793	A375	150	231	Glo	4	339	NC-1	4000	DMSO	NA	18729
12510	21/01/2016 23:00	11886	25/01/2016 23:00	6231	906793	A375	150	231	Glo	4	340	L5-D1-S	1007	Docetaxel	0.0125	8504
12510	21/01/2016 23:00	11886	25/01/2016 23:00	6231	906793	A375	150	231	Glo	4	341	L5-D2-S	1007	Docetaxel	0.00395319	6784
12510	21/01/2016 23:00	11886	25/01/2016 23:00	6231	906793	A375	150	231	Glo	4	342	L5-D3-S	1007	Docetaxel	0.00125022	9555
12510	21/01/2016 23:00	11886	25/01/2016 23:00	6231	906793	A375	150	231	Glo	4	343	L5-D4-S	1007	Docetaxel	0.000395389	20163
12510	21/01/2016 23:00	11886	25/01/2016 23:00	6231	906793	A375	150	231	Glo	4	344	L5-D5-S	1007	Docetaxel	0.000125044	15575
12510	21/01/2016 23:00	11886	25/01/2016 23:00	6231	906793	A375	150	231	Glo	4	345	L5-D6-S	1007	Docetaxel	3.95e-05	17917
12510	21/01/2016 23:00	11886	25/01/2016 23:00	6231	906793	A375	150	231	Glo	4	346	L5-D7-S	1007	Docetaxel	1.25e-05	17964
12510	21/01/2016 23:00	11886	25/01/2016 23:00	6231	906793	A375	150	231	Glo	4	361	PC1-D5-S	1862	MG-132	0.015625	17200
12510	21/01/2016 23:00	11886	25/01/2016 23:00	6231	906793	A375	150	231	Glo	4	369	NC-1	4000	DMSO	NA	19589
12510	21/01/2016 23:00	11886	25/01/2016 23:00	6231	906793	A375	150	231	Glo	4	370	NC-1	4000	DMSO	NA	16435
12510	21/01/2016 23:00	11886	25/01/2016 23:00	6231	906793	A375	150	231	Glo	4	371	NC-1	4000	DMSO	NA	15958
12510	21/01/2016 23:00	11886	25/01/2016 23:00	6231	906793	A375	150	231	Glo	4	372	PC1-D1-S	1862	MG-132	4	1338
12510	21/01/2016 23:00	11886	25/01/2016 23:00	6231	906793	A375	150	231	Glo	4	373	PC2-D1-S	1034	Staurosporine	2	2580
12510	21/01/2016 23:00	11886	25/01/2016 23:00	6231	906793	A375	150	231	Glo	4	374	NC-1	4000	DMSO	NA	17296
12510	21/01/2016 23:00	11886	25/01/2016 23:00	6231	906793	A375	150	231	Glo	4	375	NC-1	4000	DMSO	NA	15229
12510	21/01/2016 23:00	11886	25/01/2016 23:00	6231	906793	A375	150	231	Glo	4	383	UN-USED	NA	NA	NA	22074
12510	21/01/2016 23:00	11886	25/01/2016 23:00	6231	906793	A375	150	231	Glo	4	384	UN-USED	NA	NA	NA	23030
12510	21/01/2016 23:00	11886	25/01/2016 23:00	6231	906793	A375	150	231	Glo	4	385	B	NA	NA	NA	287
12510	21/01/2016 23:00	11886	25/01/2016 23:00	6231	906793	A375	150	231	Glo	4	386	UN-USED	NA	NA	NA	24941
12510	21/01/2016 23:00	11886	25/01/2016 23:00	6231	906793	A375	150	231	Glo	4	387	NC-1	4000	DMSO	NA	21309
12510	21/01/2016 23:00	11886	25/01/2016 23:00	6231	906793	A375	150	231	Glo	4	388	L6-D1-S	1010	Gefitinib	2	20354
12510	21/01/2016 23:00	11886	25/01/2016 23:00	6231	906793	A375	150	231	Glo	4	389	L6-D2-S	1010	Gefitinib	0.632511	16913
12510	21/01/2016 23:00	11886	25/01/2016 23:00	6231	906793	A375	150	231	Glo	4	390	L6-D3-S	1010	Gefitinib	0.200035	18633
12510	21/01/2016 23:00	11886	25/01/2016 23:00	6231	906793	A375	150	231	Glo	4	391	L6-D4-S	1010	Gefitinib	0.0632622	18347
12510	21/01/2016 23:00	11886	25/01/2016 23:00	6231	906793	A375	150	231	Glo	4	392	L6-D5-S	1010	Gefitinib	0.020007	17582
12510	21/01/2016 23:00	11886	25/01/2016 23:00	6231	906793	A375	150	231	Glo	4	393	L6-D6-S	1010	Gefitinib	0.00632733	19207
12510	21/01/2016 23:00	11886	25/01/2016 23:00	6231	906793	A375	150	231	Glo	4	394	L6-D7-S	1010	Gefitinib	0.00200105	17104
12510	21/01/2016 23:00	11886	25/01/2016 23:00	6231	906793	A375	150	231	Glo	4	430	NC-1	4000	DMSO	NA	18633
12510	21/01/2016 23:00	11886	25/01/2016 23:00	6231	906793	A375	150	231	Glo	4	431	UN-USED	NA	NA	NA	22265
12510	21/01/2016 23:00	11886	25/01/2016 23:00	6231	906793	A375	150	231	Glo	4	432	UN-USED	NA	NA	NA	24845
12510	21/01/2016 23:00	11886	25/01/2016 23:00	6231	906793	A375	150	231	Glo	4	433	B	NA	NA	NA	0
12510	21/01/2016 23:00	11886	25/01/2016 23:00	6231	906793	A375	150	231	Glo	4	434	UN-USED	NA	NA	NA	21978
12510	21/01/2016 23:00	11886	25/01/2016 23:00	6231	906793	A375	150	231	Glo	4	435	NC-1	4000	DMSO	NA	20067
12510	21/01/2016 23:00	11886	25/01/2016 23:00	6231	906793	A375	150	231	Glo	4	478	NC-1	4000	DMSO	NA	17678
12510	21/01/2016 23:00	11886	25/01/2016 23:00	6231	906793	A375	150	231	Glo	4	479	UN-USED	NA	NA	NA	18920
12510	21/01/2016 23:00	11886	25/01/2016 23:00	6231	906793	A375	150	231	Glo	4	480	UN-USED	NA	NA	NA	19398
12510	21/01/2016 23:00	11886	25/01/2016 23:00	6231	906793	A375	150	231	Glo	4	481	B	NA	NA	NA	191
12510	21/01/2016 23:00	11886	25/01/2016 23:00	6231	906793	A375	150	231	Glo	4	482	UN-USED	NA	NA	NA	23985
12510	21/01/2016 23:00	11886	25/01/2016 23:00	6231	906793	A375	150	231	Glo	4	483	L8-D1-S	1012	Vorinostat	10	1393
12510	21/01/2016 23:00	11886	25/01/2016 23:00	6231	906793	A375	150	231	Glo	4	484	L8-D2-S	1012	Vorinostat	3.16256	8026
12510	21/01/2016 23:00	11886	25/01/2016 23:00	6231	906793	A375	150	231	Glo	4	485	L8-D3-S	1012	Vorinostat	1.00018	20736
12510	21/01/2016 23:00	11886	25/01/2016 23:00	6231	906793	A375	150	231	Glo	4	486	L8-D4-S	1012	Vorinostat	0.316311	19207
12510	21/01/2016 23:00	11886	25/01/2016 23:00	6231	906793	A375	150	231	Glo	4	487	L8-D5-S	1012	Vorinostat	0.100035	20354
12510	21/01/2016 23:00	11886	25/01/2016 23:00	6231	906793	A375	150	231	Glo	4	488	L8-D6-S	1012	Vorinostat	0.0316367	18633
12510	21/01/2016 23:00	11886	25/01/2016 23:00	6231	906793	A375	150	231	Glo	4	489	L8-D7-S	1012	Vorinostat	0.0100053	21692
12510	21/01/2016 23:00	11886	25/01/2016 23:00	6231	906793	A375	150	231	Glo	4	490	NC-1	4000	DMSO	NA	17200
12510	21/01/2016 23:00	11886	25/01/2016 23:00	6231	906793	A375	150	231	Glo	4	491	NC-1	4000	DMSO	NA	17391
12510	21/01/2016 23:00	11886	25/01/2016 23:00	6231	906793	A375	150	231	Glo	4	492	PC2-D1-S	1034	Staurosporine	2	2198
12510	21/01/2016 23:00	11886	25/01/2016 23:00	6231	906793	A375	150	231	Glo	4	493	PC1-D1-S	1862	MG-132	4	1194
12510	21/01/2016 23:00	11886	25/01/2016 23:00	6231	906793	A375	150	231	Glo	4	494	NC-1	4000	DMSO	NA	19111
12510	21/01/2016 23:00	11886	25/01/2016 23:00	6231	906793	A375	150	231	Glo	4	495	NC-1	4000	DMSO	NA	19494
12510	21/01/2016 23:00	11886	25/01/2016 23:00	6231	906793	A375	150	231	Glo	4	496	NC-1	4000	DMSO	NA	21692
12510	21/01/2016 23:00	11886	25/01/2016 23:00	6231	906793	A375	150	231	Glo	4	497	NC-1	4000	DMSO	NA	16340
12510	21/01/2016 23:00	11886	25/01/2016 23:00	6231	906793	A375	150	231	Glo	4	519	NC-1	4000	DMSO	NA	17296
12510	21/01/2016 23:00	11886	25/01/2016 23:00	6231	906793	A375	150	231	Glo	4	527	UN-USED	NA	NA	NA	19685
12510	21/01/2016 23:00	11886	25/01/2016 23:00	6231	906793	A375	150	231	Glo	4	528	UN-USED	NA	NA	NA	19685
12510	21/01/2016 23:00	11886	25/01/2016 23:00	6231	906793	A375	150	231	Glo	4	529	B	NA	NA	NA	191
12510	21/01/2016 23:00	11886	25/01/2016 23:00	6231	906793	A375	150	231	Glo	4	530	UN-USED	NA	NA	NA	22456
12510	21/01/2016 23:00	11886	25/01/2016 23:00	6231	906793	A375	150	231	Glo	4	531	L9-D1-S	1013	Nilotinib	2	19111
12510	21/01/2016 23:00	11886	25/01/2016 23:00	6231	906793	A375	150	231	Glo	4	532	L9-D2-S	1013	Nilotinib	0.632511	18251
12510	21/01/2016 23:00	11886	25/01/2016 23:00	6231	906793	A375	150	231	Glo	4	533	L9-D3-S	1013	Nilotinib	0.200035	21309
12510	21/01/2016 23:00	11886	25/01/2016 23:00	6231	906793	A375	150	231	Glo	4	534	L9-D4-S	1013	Nilotinib	0.0632622	17200
12510	21/01/2016 23:00	11886	25/01/2016 23:00	6231	906793	A375	150	231	Glo	4	535	L9-D5-S	1013	Nilotinib	0.020007	18912
12510	21/01/2016 23:00	11886	25/01/2016 23:00	6231	906793	A375	150	231	Glo	4	536	L9-D6-S	1013	Nilotinib	0.00632733	20258
12510	21/01/2016 23:00	11886	25/01/2016 23:00	6231	906793	A375	150	231	Glo	4	537	L9-D7-S	1013	Nilotinib	0.00200105	20545
12510	21/01/2016 23:00	11886	25/01/2016 23:00	6231	906793	A375	150	231	Glo	4	552	NC-1	4000	DMSO	NA	16623
12510	21/01/2016 23:00	11886	25/01/2016 23:00	6231	906793	A375	150	231	Glo	4	560	NC-1	4000	DMSO	NA	17487
12510	21/01/2016 23:00	11886	25/01/2016 23:00	6231	906793	A375	150	231	Glo	4	561	PC2-D5-S	1034	Staurosporine	0.0078125	13377
12510	21/01/2016 23:00	11886	25/01/2016 23:00	6231	906793	A375	150	231	Glo	4	562	PC2-D4-S	1034	Staurosporine	0.03125	10128
12510	21/01/2016 23:00	11886	25/01/2016 23:00	6231	906793	A375	150	231	Glo	4	563	PC2-D3-S	1034	Staurosporine	0.125	6880
12510	21/01/2016 23:00	11886	25/01/2016 23:00	6231	906793	A375	150	231	Glo	4	564	PC2-D2-S	1034	Staurosporine	0.5	3631
12510	21/01/2016 23:00	11886	25/01/2016 23:00	6231	906793	A375	150	231	Glo	4	565	PC2-D1-S	1034	Staurosporine	2	1338
12510	21/01/2016 23:00	11886	25/01/2016 23:00	6231	906793	A375	150	231	Glo	4	566	NC-1	4000	DMSO	NA	18729
12510	21/01/2016 23:00	11886	25/01/2016 23:00	6231	906793	A375	150	231	Glo	4	567	PC1-D1-S	1862	MG-132	4	3249
12510	21/01/2016 23:00	11886	25/01/2016 23:00	6231	906793	A375	150	231	Glo	4	575	UN-USED	NA	NA	NA	20927
12510	21/01/2016 23:00	11886	25/01/2016 23:00	6231	906793	A375	150	231	Glo	4	576	UN-USED	NA	NA	NA	19016
12510	21/01/2016 23:00	11886	25/01/2016 23:00	6231	906793	A375	150	231	Glo	4	577	B	NA	NA	NA	96
12510	21/01/2016 23:00	11886	25/01/2016 23:00	6231	906793	A375	150	231	Glo	4	578	UN-USED	NA	NA	NA	26948
12510	21/01/2016 23:00	11886	25/01/2016 23:00	6231	906793	A375	150	231	Glo	4	579	L10-D1-S	1022	AZD7762	10	1529
12510	21/01/2016 23:00	11886	25/01/2016 23:00	6231	906793	A375	150	231	Glo	4	580	L10-D2-S	1022	AZD7762	3.16256	3249
12510	21/01/2016 23:00	11886	25/01/2016 23:00	6231	906793	A375	150	231	Glo	4	581	L10-D3-S	1022	AZD7762	1.00018	6593
12510	21/01/2016 23:00	11886	25/01/2016 23:00	6231	906793	A375	150	231	Glo	4	582	L10-D4-S	1022	AZD7762	0.316311	17009
12510	21/01/2016 23:00	11886	25/01/2016 23:00	6231	906793	A375	150	231	Glo	4	583	L10-D5-S	1022	AZD7762	0.100035	21214
12510	21/01/2016 23:00	11886	25/01/2016 23:00	6231	906793	A375	150	231	Glo	4	584	L10-D6-S	1022	AZD7762	0.0316367	20831
12510	21/01/2016 23:00	11886	25/01/2016 23:00	6231	906793	A375	150	231	Glo	4	585	L10-D7-S	1022	AZD7762	0.0100053	18825
12510	21/01/2016 23:00	11886	25/01/2016 23:00	6231	906793	A375	150	231	Glo	4	600	NC-1	4000	DMSO	NA	20831
12510	21/01/2016 23:00	11886	25/01/2016 23:00	6231	906793	A375	150	231	Glo	4	615	NC-1	4000	DMSO	NA	16531
12510	21/01/2016 23:00	11886	25/01/2016 23:00	6231	906793	A375	150	231	Glo	4	623	UN-USED	NA	NA	NA	20545
12510	21/01/2016 23:00	11886	25/01/2016 23:00	6231	906793	A375	150	231	Glo	4	624	UN-USED	NA	NA	NA	24654
12510	21/01/2016 23:00	11886	25/01/2016 23:00	6231	906793	A375	150	231	Glo	4	625	B	NA	NA	NA	382
12510	21/01/2016 23:00	11886	25/01/2016 23:00	6231	906793	A375	150	231	Glo	4	626	UN-USED	NA	NA	NA	23985
12510	21/01/2016 23:00	11886	25/01/2016 23:00	6231	906793	A375	150	231	Glo	4	627	L11-D1-S	1032	Afatinib	10	2389
12510	21/01/2016 23:00	11886	25/01/2016 23:00	6231	906793	A375	150	231	Glo	4	628	L11-D2-S	1032	Afatinib	3.16256	10893
12510	21/01/2016 23:00	11886	25/01/2016 23:00	6231	906793	A375	150	231	Glo	4	629	L11-D3-S	1032	Afatinib	1.00018	19398
12510	21/01/2016 23:00	11886	25/01/2016 23:00	6231	906793	A375	150	231	Glo	4	630	L11-D4-S	1032	Afatinib	0.316311	19589
12510	21/01/2016 23:00	11886	25/01/2016 23:00	6231	906793	A375	150	231	Glo	4	631	L11-D5-S	1032	Afatinib	0.100035	21405
12510	21/01/2016 23:00	11886	25/01/2016 23:00	6231	906793	A375	150	231	Glo	4	632	L11-D6-S	1032	Afatinib	0.0316367	21883
12510	21/01/2016 23:00	11886	25/01/2016 23:00	6231	906793	A375	150	231	Glo	4	633	L11-D7-S	1032	Afatinib	0.0100053	18347
12510	21/01/2016 23:00	11886	25/01/2016 23:00	6231	906793	A375	150	231	Glo	4	634	L35-D1-S	1199	Tamoxifen	10	15671
12510	21/01/2016 23:00	11886	25/01/2016 23:00	6231	906793	A375	150	231	Glo	4	635	L35-D2-S	1199	Tamoxifen	3.16256	19207
12510	21/01/2016 23:00	11886	25/01/2016 23:00	6231	906793	A375	150	231	Glo	4	636	L35-D3-S	1199	Tamoxifen	1.00018	21787
12510	21/01/2016 23:00	11886	25/01/2016 23:00	6231	906793	A375	150	231	Glo	4	637	L35-D4-S	1199	Tamoxifen	0.316311	20927
12510	21/01/2016 23:00	11886	25/01/2016 23:00	6231	906793	A375	150	231	Glo	4	638	L35-D5-S	1199	Tamoxifen	0.100035	22743
12510	21/01/2016 23:00	11886	25/01/2016 23:00	6231	906793	A375	150	231	Glo	4	639	L35-D6-S	1199	Tamoxifen	0.0316367	21500
12510	21/01/2016 23:00	11886	25/01/2016 23:00	6231	906793	A375	150	231	Glo	4	640	L35-D7-S	1199	Tamoxifen	0.0100053	19302
12510	21/01/2016 23:00	11886	25/01/2016 23:00	6231	906793	A375	150	231	Glo	4	641	NC-1	4000	DMSO	NA	17964
12510	21/01/2016 23:00	11886	25/01/2016 23:00	6231	906793	A375	150	231	Glo	4	663	NC-1	4000	DMSO	NA	19494
12510	21/01/2016 23:00	11886	25/01/2016 23:00	6231	906793	A375	150	231	Glo	4	671	UN-USED	NA	NA	NA	22074
12510	21/01/2016 23:00	11886	25/01/2016 23:00	6231	906793	A375	150	231	Glo	4	672	UN-USED	NA	NA	NA	21787
12510	21/01/2016 23:00	11886	25/01/2016 23:00	6231	906793	A375	150	231	Glo	4	673	B	NA	NA	NA	96
12510	21/01/2016 23:00	11886	25/01/2016 23:00	6231	906793	A375	150	231	Glo	4	674	UN-USED	NA	NA	NA	23699
12510	21/01/2016 23:00	11886	25/01/2016 23:00	6231	906793	A375	150	231	Glo	4	675	NC-1	4000	DMSO	NA	22552
12510	21/01/2016 23:00	11886	25/01/2016 23:00	6231	906793	A375	150	231	Glo	4	676	PC2-D1-S	1034	Staurosporine	2	1242
12510	21/01/2016 23:00	11886	25/01/2016 23:00	6231	906793	A375	150	231	Glo	4	677	PC1-D1-S	1862	MG-132	4	1147
12510	21/01/2016 23:00	11886	25/01/2016 23:00	6231	906793	A375	150	231	Glo	4	678	NC-1	4000	DMSO	NA	18729
12510	21/01/2016 23:00	11886	25/01/2016 23:00	6231	906793	A375	150	231	Glo	4	679	NC-0	NA	NA	NA	18825
12510	21/01/2016 23:00	11886	25/01/2016 23:00	6231	906793	A375	150	231	Glo	4	680	NC-1	4000	DMSO	NA	18251
12510	21/01/2016 23:00	11886	25/01/2016 23:00	6231	906793	A375	150	231	Glo	4	681	NC-1	4000	DMSO	NA	21500
12510	21/01/2016 23:00	11886	25/01/2016 23:00	6231	906793	A375	150	231	Glo	4	689	NC-1	4000	DMSO	NA	20258
12510	21/01/2016 23:00	11886	25/01/2016 23:00	6231	906793	A375	150	231	Glo	4	711	NC-1	4000	DMSO	NA	19780
12510	21/01/2016 23:00	11886	25/01/2016 23:00	6231	906793	A375	150	231	Glo	4	719	UN-USED	NA	NA	NA	23507
12510	21/01/2016 23:00	11886	25/01/2016 23:00	6231	906793	A375	150	231	Glo	4	720	UN-USED	NA	NA	NA	24559
12510	21/01/2016 23:00	11886	25/01/2016 23:00	6231	906793	A375	150	231	Glo	4	721	B	NA	NA	NA	96
12510	21/01/2016 23:00	11886	25/01/2016 23:00	6231	906793	A375	150	231	Glo	4	722	UN-USED	NA	NA	NA	25801
12510	21/01/2016 23:00	11886	25/01/2016 23:00	6231	906793	A375	150	231	Glo	4	723	L12-D1-S	1036	PLX4720	10	7262
12510	21/01/2016 23:00	11886	25/01/2016 23:00	6231	906793	A375	150	231	Glo	4	724	L12-D2-S	1036	PLX4720	3.16256	7357
12510	21/01/2016 23:00	11886	25/01/2016 23:00	6231	906793	A375	150	231	Glo	4	725	L12-D3-S	1036	PLX4720	1.00018	10797
12510	21/01/2016 23:00	11886	25/01/2016 23:00	6231	906793	A375	150	231	Glo	4	726	L12-D4-S	1036	PLX4720	0.316311	13473
12510	21/01/2016 23:00	11886	25/01/2016 23:00	6231	906793	A375	150	231	Glo	4	727	L12-D5-S	1036	PLX4720	0.100035	16340
12510	21/01/2016 23:00	11886	25/01/2016 23:00	6231	906793	A375	150	231	Glo	4	728	L12-D6-S	1036	PLX4720	0.0316367	15002
12510	21/01/2016 23:00	11886	25/01/2016 23:00	6231	906793	A375	150	231	Glo	4	729	L12-D7-S	1036	PLX4720	0.0100053	18825
12510	21/01/2016 23:00	11886	25/01/2016 23:00	6231	906793	A375	150	231	Glo	4	730	NC-1	4000	DMSO	NA	20640
12510	21/01/2016 23:00	11886	25/01/2016 23:00	6231	906793	A375	150	231	Glo	4	738	NC-0	NA	NA	NA	19971
12510	21/01/2016 23:00	11886	25/01/2016 23:00	6231	906793	A375	150	231	Glo	4	739	NC-1	4000	DMSO	NA	17678
12510	21/01/2016 23:00	11886	25/01/2016 23:00	6231	906793	A375	150	231	Glo	4	740	NC-1	4000	DMSO	NA	17869
12510	21/01/2016 23:00	11886	25/01/2016 23:00	6231	906793	A375	150	231	Glo	4	741	PC2-D1-S	1034	Staurosporine	2	2866
12510	21/01/2016 23:00	11886	25/01/2016 23:00	6231	906793	A375	150	231	Glo	4	742	PC1-D1-S	1862	MG-132	4	1720
12510	21/01/2016 23:00	11886	25/01/2016 23:00	6231	906793	A375	150	231	Glo	4	743	NC-1	4000	DMSO	NA	19780
12510	21/01/2016 23:00	11886	25/01/2016 23:00	6231	906793	A375	150	231	Glo	4	744	NC-1	4000	DMSO	NA	17487
12510	21/01/2016 23:00	11886	25/01/2016 23:00	6231	906793	A375	150	231	Glo	4	759	NC-1	4000	DMSO	NA	20831
12510	21/01/2016 23:00	11886	25/01/2016 23:00	6231	906793	A375	150	231	Glo	4	767	UN-USED	NA	NA	NA	21023
12510	21/01/2016 23:00	11886	25/01/2016 23:00	6231	906793	A375	150	231	Glo	4	768	UN-USED	NA	NA	NA	23603
12510	21/01/2016 23:00	11886	25/01/2016 23:00	6231	906793	A375	150	231	Glo	4	769	B	NA	NA	NA	96
12510	21/01/2016 23:00	11886	25/01/2016 23:00	6231	906793	A375	150	231	Glo	4	770	UN-USED	NA	NA	NA	24654
12510	21/01/2016 23:00	11886	25/01/2016 23:00	6231	906793	A375	150	231	Glo	4	771	L13-D1-S	1046	681640	10	4969
12510	21/01/2016 23:00	11886	25/01/2016 23:00	6231	906793	A375	150	231	Glo	4	772	L13-D2-S	1046	681640	3.16256	8122
12510	21/01/2016 23:00	11886	25/01/2016 23:00	6231	906793	A375	150	231	Glo	4	773	L13-D3-S	1046	681640	1.00018	17009
12510	21/01/2016 23:00	11886	25/01/2016 23:00	6231	906793	A375	150	231	Glo	4	774	L13-D4-S	1046	681640	0.316311	17200
12510	21/01/2016 23:00	11886	25/01/2016 23:00	6231	906793	A375	150	231	Glo	4	775	L13-D5-S	1046	681640	0.100035	26088
12510	21/01/2016 23:00	11886	25/01/2016 23:00	6231	906793	A375	150	231	Glo	4	776	L13-D6-S	1046	681640	0.0316367	20258
12510	21/01/2016 23:00	11886	25/01/2016 23:00	6231	906793	A375	150	231	Glo	4	777	L13-D7-S	1046	681640	0.0100053	21596
12510	21/01/2016 23:00	11886	25/01/2016 23:00	6231	906793	A375	150	231	Glo	4	778	NC-1	4000	DMSO	NA	19589
12510	21/01/2016 23:00	11886	25/01/2016 23:00	6231	906793	A375	150	231	Glo	4	779	L38-D1-S	1239	YK 4-279	20	5829
12510	21/01/2016 23:00	11886	25/01/2016 23:00	6231	906793	A375	150	231	Glo	4	780	L38-D2-S	1239	YK 4-279	6.32511	7453
12510	21/01/2016 23:00	11886	25/01/2016 23:00	6231	906793	A375	150	231	Glo	4	781	L38-D3-S	1239	YK 4-279	2.00035	5673
12510	21/01/2016 23:00	11886	25/01/2016 23:00	6231	906793	A375	150	231	Glo	4	782	L38-D4-S	1239	YK 4-279	0.632622	15480
12510	21/01/2016 23:00	11886	25/01/2016 23:00	6231	906793	A375	150	231	Glo	4	783	L38-D5-S	1239	YK 4-279	0.20007	20545
12510	21/01/2016 23:00	11886	25/01/2016 23:00	6231	906793	A375	150	231	Glo	4	784	L38-D6-S	1239	YK 4-279	0.0632733	21883
12510	21/01/2016 23:00	11886	25/01/2016 23:00	6231	906793	A375	150	231	Glo	4	785	L38-D7-S	1239	YK 4-279	0.0200105	19685
12510	21/01/2016 23:00	11886	25/01/2016 23:00	6231	906793	A375	150	231	Glo	4	793	NC-1	4000	DMSO	NA	20449
12510	21/01/2016 23:00	11886	25/01/2016 23:00	6231	906793	A375	150	231	Glo	4	794	NC-1	4000	DMSO	NA	19780
12510	21/01/2016 23:00	11886	25/01/2016 23:00	6231	906793	A375	150	231	Glo	4	795	PC2-D1-S	1034	Staurosporine	2	2389
12510	21/01/2016 23:00	11886	25/01/2016 23:00	6231	906793	A375	150	231	Glo	4	796	PC1-D1-S	1862	MG-132	4	2006
12510	21/01/2016 23:00	11886	25/01/2016 23:00	6231	906793	A375	150	231	Glo	4	797	NC-1	4000	DMSO	NA	18251
12510	21/01/2016 23:00	11886	25/01/2016 23:00	6231	906793	A375	150	231	Glo	4	798	NC-1	4000	DMSO	NA	20736
12510	21/01/2016 23:00	11886	25/01/2016 23:00	6231	906793	A375	150	231	Glo	4	799	NC-0	NA	NA	NA	20354
12510	21/01/2016 23:00	11886	25/01/2016 23:00	6231	906793	A375	150	231	Glo	4	807	NC-1	4000	DMSO	NA	18060
12510	21/01/2016 23:00	11886	25/01/2016 23:00	6231	906793	A375	150	231	Glo	4	815	UN-USED	NA	NA	NA	21309
12510	21/01/2016 23:00	11886	25/01/2016 23:00	6231	906793	A375	150	231	Glo	4	816	UN-USED	NA	NA	NA	22361
12510	21/01/2016 23:00	11886	25/01/2016 23:00	6231	906793	A375	150	231	Glo	4	817	B	NA	NA	NA	191
12510	21/01/2016 23:00	11886	25/01/2016 23:00	6231	906793	A375	150	231	Glo	4	818	UN-USED	NA	NA	NA	24559
12510	21/01/2016 23:00	11886	25/01/2016 23:00	6231	906793	A375	150	231	Glo	4	819	L14-D1-S	1047	Nutlin-3a (-)	8	6868
12510	21/01/2016 23:00	11886	25/01/2016 23:00	6231	906793	A375	150	231	Glo	4	820	L14-D2-S	1047	Nutlin-3a (-)	2.53004	10511
12510	21/01/2016 23:00	11886	25/01/2016 23:00	6231	906793	A375	150	231	Glo	4	821	L14-D3-S	1047	Nutlin-3a (-)	0.800141	19398
12510	21/01/2016 23:00	11886	25/01/2016 23:00	6231	906793	A375	150	231	Glo	4	822	L14-D4-S	1047	Nutlin-3a (-)	0.253049	22361
12510	21/01/2016 23:00	11886	25/01/2016 23:00	6231	906793	A375	150	231	Glo	4	823	L14-D5-S	1047	Nutlin-3a (-)	0.0800281	20258
12510	21/01/2016 23:00	11886	25/01/2016 23:00	6231	906793	A375	150	231	Glo	4	824	L14-D6-S	1047	Nutlin-3a (-)	0.0253093	20927
12510	21/01/2016 23:00	11886	25/01/2016 23:00	6231	906793	A375	150	231	Glo	4	825	L14-D7-S	1047	Nutlin-3a (-)	0.00800422	20354
12510	21/01/2016 23:00	11886	25/01/2016 23:00	6231	906793	A375	150	231	Glo	4	826	NC-1	4000	DMSO	NA	18825
12510	21/01/2016 23:00	11886	25/01/2016 23:00	6231	906793	A375	150	231	Glo	4	827	L39-D1-S	1259	Talazoparib	10	7931
12510	21/01/2016 23:00	11886	25/01/2016 23:00	6231	906793	A375	150	231	Glo	4	828	L39-D2-S	1259	Talazoparib	3.16256	8261
12510	21/01/2016 23:00	11886	25/01/2016 23:00	6231	906793	A375	150	231	Glo	4	829	L39-D3-S	1259	Talazoparib	1.00018	11275
12510	21/01/2016 23:00	11886	25/01/2016 23:00	6231	906793	A375	150	231	Glo	4	830	L39-D4-S	1259	Talazoparib	0.316311	13760
12510	21/01/2016 23:00	11886	25/01/2016 23:00	6231	906793	A375	150	231	Glo	4	831	L39-D5-S	1259	Talazoparib	0.100035	17200
12510	21/01/2016 23:00	11886	25/01/2016 23:00	6231	906793	A375	150	231	Glo	4	832	L39-D6-S	1259	Talazoparib	0.0316367	19398
12510	21/01/2016 23:00	11886	25/01/2016 23:00	6231	906793	A375	150	231	Glo	4	833	L39-D7-S	1259	Talazoparib	0.0100053	17964
12510	21/01/2016 23:00	11886	25/01/2016 23:00	6231	906793	A375	150	231	Glo	4	848	NC-1	4000	DMSO	NA	18825
12510	21/01/2016 23:00	11886	25/01/2016 23:00	6231	906793	A375	150	231	Glo	4	856	NC-1	4000	DMSO	NA	17200
12510	21/01/2016 23:00	11886	25/01/2016 23:00	6231	906793	A375	150	231	Glo	4	857	NC-1	4000	DMSO	NA	20736
12510	21/01/2016 23:00	11886	25/01/2016 23:00	6231	906793	A375	150	231	Glo	4	858	NC-0	NA	NA	NA	21978
12510	21/01/2016 23:00	11886	25/01/2016 23:00	6231	906793	A375	150	231	Glo	4	859	NC-1	4000	DMSO	NA	19971
12510	21/01/2016 23:00	11886	25/01/2016 23:00	6231	906793	A375	150	231	Glo	4	860	PC2-D1-S	1034	Staurosporine	2	2102
12510	21/01/2016 23:00	11886	25/01/2016 23:00	6231	906793	A375	150	231	Glo	4	861	PC1-D1-S	1862	MG-132	4	2675
12510	21/01/2016 23:00	11886	25/01/2016 23:00	6231	906793	A375	150	231	Glo	4	862	NC-1	4000	DMSO	NA	22552
12510	21/01/2016 23:00	11886	25/01/2016 23:00	6231	906793	A375	150	231	Glo	4	863	UN-USED	NA	NA	NA	23890
12510	21/01/2016 23:00	11886	25/01/2016 23:00	6231	906793	A375	150	231	Glo	4	864	UN-USED	NA	NA	NA	22647
12510	21/01/2016 23:00	11886	25/01/2016 23:00	6231	906793	A375	150	231	Glo	4	865	B	NA	NA	NA	96
12510	21/01/2016 23:00	11886	25/01/2016 23:00	6231	906793	A375	150	231	Glo	4	866	UN-USED	NA	NA	NA	26566
12510	21/01/2016 23:00	11886	25/01/2016 23:00	6231	906793	A375	150	231	Glo	4	867	L15-D1-S	1049	PD-173074	2	23985
12510	21/01/2016 23:00	11886	25/01/2016 23:00	6231	906793	A375	150	231	Glo	4	868	L15-D2-S	1049	PD-173074	0.632511	19685
12510	21/01/2016 23:00	11886	25/01/2016 23:00	6231	906793	A375	150	231	Glo	4	869	L15-D3-S	1049	PD-173074	0.200035	20163
12510	21/01/2016 23:00	11886	25/01/2016 23:00	6231	906793	A375	150	231	Glo	4	870	L15-D4-S	1049	PD-173074	0.0632622	19589
12510	21/01/2016 23:00	11886	25/01/2016 23:00	6231	906793	A375	150	231	Glo	4	871	L15-D5-S	1049	PD-173074	0.020007	21883
12510	21/01/2016 23:00	11886	25/01/2016 23:00	6231	906793	A375	150	231	Glo	4	872	L15-D6-S	1049	PD-173074	0.00632733	20449
12510	21/01/2016 23:00	11886	25/01/2016 23:00	6231	906793	A375	150	231	Glo	4	873	L15-D7-S	1049	PD-173074	0.00200105	17964
12510	21/01/2016 23:00	11886	25/01/2016 23:00	6231	906793	A375	150	231	Glo	4	874	NC-1	4000	DMSO	NA	14906
12510	21/01/2016 23:00	11886	25/01/2016 23:00	6231	906793	A375	150	231	Glo	4	875	L40-D1-S	1372	Trametinib	1	9173
12510	21/01/2016 23:00	11886	25/01/2016 23:00	6231	906793	A375	150	231	Glo	4	876	L40-D2-S	1372	Trametinib	0.316256	7931
12510	21/01/2016 23:00	11886	25/01/2016 23:00	6231	906793	A375	150	231	Glo	4	877	L40-D3-S	1372	Trametinib	0.100018	7071
12510	21/01/2016 23:00	11886	25/01/2016 23:00	6231	906793	A375	150	231	Glo	4	878	L40-D4-S	1372	Trametinib	0.0316311	7644
12510	21/01/2016 23:00	11886	25/01/2016 23:00	6231	906793	A375	150	231	Glo	4	879	L40-D5-S	1372	Trametinib	0.0100035	7548
12510	21/01/2016 23:00	11886	25/01/2016 23:00	6231	906793	A375	150	231	Glo	4	880	L40-D6-S	1372	Trametinib	0.00316367	9842
12510	21/01/2016 23:00	11886	25/01/2016 23:00	6231	906793	A375	150	231	Glo	4	881	L40-D7-S	1372	Trametinib	0.00100053	14811
12510	21/01/2016 23:00	11886	25/01/2016 23:00	6231	906793	A375	150	231	Glo	4	896	NC-1	4000	DMSO	NA	21118
12510	21/01/2016 23:00	11886	25/01/2016 23:00	6231	906793	A375	150	231	Glo	4	911	UN-USED	NA	NA	NA	23794
12510	21/01/2016 23:00	11886	25/01/2016 23:00	6231	906793	A375	150	231	Glo	4	912	UN-USED	NA	NA	NA	21309
12510	21/01/2016 23:00	11886	25/01/2016 23:00	6231	906793	A375	150	231	Glo	4	913	B	NA	NA	NA	96
12510	21/01/2016 23:00	11886	25/01/2016 23:00	6231	906793	A375	150	231	Glo	4	914	UN-USED	NA	NA	NA	23507
12510	21/01/2016 23:00	11886	25/01/2016 23:00	6231	906793	A375	150	231	Glo	4	915	L16-D1-S	1053	MK-2206	10	18633
12510	21/01/2016 23:00	11886	25/01/2016 23:00	6231	906793	A375	150	231	Glo	4	916	L16-D2-S	1053	MK-2206	3.16256	17391
12510	21/01/2016 23:00	11886	25/01/2016 23:00	6231	906793	A375	150	231	Glo	4	917	L16-D3-S	1053	MK-2206	1.00018	21692
12510	21/01/2016 23:00	11886	25/01/2016 23:00	6231	906793	A375	150	231	Glo	4	918	L16-D4-S	1053	MK-2206	0.316311	20927
12510	21/01/2016 23:00	11886	25/01/2016 23:00	6231	906793	A375	150	231	Glo	4	919	L16-D5-S	1053	MK-2206	0.100035	23221
12510	21/01/2016 23:00	11886	25/01/2016 23:00	6231	906793	A375	150	231	Glo	4	920	L16-D6-S	1053	MK-2206	0.0316367	20736
12510	21/01/2016 23:00	11886	25/01/2016 23:00	6231	906793	A375	150	231	Glo	4	921	L16-D7-S	1053	MK-2206	0.0100053	20736
12510	21/01/2016 23:00	11886	25/01/2016 23:00	6231	906793	A375	150	231	Glo	4	922	NC-1	4000	DMSO	NA	19876
12510	21/01/2016 23:00	11886	25/01/2016 23:00	6231	906793	A375	150	231	Glo	4	923	L41-D1-S	1495	Olaparib	10	14046
12510	21/01/2016 23:00	11886	25/01/2016 23:00	6231	906793	A375	150	231	Glo	4	924	L41-D2-S	1495	Olaparib	3.16256	14524
12510	21/01/2016 23:00	11886	25/01/2016 23:00	6231	906793	A375	150	231	Glo	4	925	L41-D3-S	1495	Olaparib	1.00018	20449
12510	21/01/2016 23:00	11886	25/01/2016 23:00	6231	906793	A375	150	231	Glo	4	926	L41-D4-S	1495	Olaparib	0.316311	20258
12510	21/01/2016 23:00	11886	25/01/2016 23:00	6231	906793	A375	150	231	Glo	4	927	L41-D5-S	1495	Olaparib	0.100035	18251
12510	21/01/2016 23:00	11886	25/01/2016 23:00	6231	906793	A375	150	231	Glo	4	928	L41-D6-S	1495	Olaparib	0.0316367	21405
12510	21/01/2016 23:00	11886	25/01/2016 23:00	6231	906793	A375	150	231	Glo	4	929	L41-D7-S	1495	Olaparib	0.0100053	17964
12510	21/01/2016 23:00	11886	25/01/2016 23:00	6231	906793	A375	150	231	Glo	4	937	NC-1	4000	DMSO	NA	20306
12510	21/01/2016 23:00	11886	25/01/2016 23:00	6231	906793	A375	150	231	Glo	4	959	UN-USED	NA	NA	NA	23412
12510	21/01/2016 23:00	11886	25/01/2016 23:00	6231	906793	A375	150	231	Glo	4	960	UN-USED	NA	NA	NA	19398
12510	21/01/2016 23:00	11886	25/01/2016 23:00	6231	906793	A375	150	231	Glo	4	961	B	NA	NA	NA	191
12510	21/01/2016 23:00	11886	25/01/2016 23:00	6231	906793	A375	150	231	Glo	4	962	UN-USED	NA	NA	NA	23890
12510	21/01/2016 23:00	11886	25/01/2016 23:00	6231	906793	A375	150	231	Glo	4	963	L17-D1-S	1054	PD-0332991	10	10702
12510	21/01/2016 23:00	11886	25/01/2016 23:00	6231	906793	A375	150	231	Glo	4	964	L17-D2-S	1054	PD-0332991	3.16256	15480
12510	21/01/2016 23:00	11886	25/01/2016 23:00	6231	906793	A375	150	231	Glo	4	965	L17-D3-S	1054	PD-0332991	1.00018	19111
12510	21/01/2016 23:00	11886	25/01/2016 23:00	6231	906793	A375	150	231	Glo	4	966	L17-D4-S	1054	PD-0332991	0.316311	17296
12510	21/01/2016 23:00	11886	25/01/2016 23:00	6231	906793	A375	150	231	Glo	4	967	L17-D5-S	1054	PD-0332991	0.100035	21023
12510	21/01/2016 23:00	11886	25/01/2016 23:00	6231	906793	A375	150	231	Glo	4	968	L17-D6-S	1054	PD-0332991	0.0316367	20163
12510	21/01/2016 23:00	11886	25/01/2016 23:00	6231	906793	A375	150	231	Glo	4	969	L17-D7-S	1054	PD-0332991	0.0100053	20449
12510	21/01/2016 23:00	11886	25/01/2016 23:00	6231	906793	A375	150	231	Glo	4	970	PC2-D1-S	1034	Staurosporine	2	2484
12510	21/01/2016 23:00	11886	25/01/2016 23:00	6231	906793	A375	150	231	Glo	4	971	NC-1	4000	DMSO	NA	17678
12510	21/01/2016 23:00	11886	25/01/2016 23:00	6231	906793	A375	150	231	Glo	4	972	PC1-D1-S	1862	MG-132	4	1294
12510	21/01/2016 23:00	11886	25/01/2016 23:00	6231	906793	A375	150	231	Glo	4	973	PC1-D2-S	1862	MG-132	1	860
12510	21/01/2016 23:00	11886	25/01/2016 23:00	6231	906793	A375	150	231	Glo	4	974	PC1-D3-S	1862	MG-132	0.25	3153
12510	21/01/2016 23:00	11886	25/01/2016 23:00	6231	906793	A375	150	231	Glo	4	975	PC1-D4-S	1862	MG-132	0.0625	19207
12510	21/01/2016 23:00	11886	25/01/2016 23:00	6231	906793	A375	150	231	Glo	4	976	PC1-D5-S	1862	MG-132	0.015625	18633
12510	21/01/2016 23:00	11886	25/01/2016 23:00	6231	906793	A375	150	231	Glo	4	977	NC-1	4000	DMSO	NA	18825
12510	21/01/2016 23:00	11886	25/01/2016 23:00	6231	906793	A375	150	231	Glo	4	985	NC-1	4000	DMSO	NA	19494
12510	21/01/2016 23:00	11886	25/01/2016 23:00	6231	906793	A375	150	231	Glo	4	1007	UN-USED	NA	NA	NA	19685
12510	21/01/2016 23:00	11886	25/01/2016 23:00	6231	906793	A375	150	231	Glo	4	1008	UN-USED	NA	NA	NA	23507
12510	21/01/2016 23:00	11886	25/01/2016 23:00	6231	906793	A375	150	231	Glo	4	1009	B	NA	NA	NA	0
12510	21/01/2016 23:00	11886	25/01/2016 23:00	6231	906793	A375	150	231	Glo	4	1010	UN-USED	NA	NA	NA	22074
12510	21/01/2016 23:00	11886	25/01/2016 23:00	6231	906793	A375	150	231	Glo	4	1011	L18-D1-S	1057	BEZ235	0.25	4969
12510	21/01/2016 23:00	11886	25/01/2016 23:00	6231	906793	A375	150	231	Glo	4	1012	L18-D2-S	1057	BEZ235	0.0790639	7357
12510	21/01/2016 23:00	11886	25/01/2016 23:00	6231	906793	A375	150	231	Glo	4	1013	L18-D3-S	1057	BEZ235	0.0250044	12040
12510	21/01/2016 23:00	11886	25/01/2016 23:00	6231	906793	A375	150	231	Glo	4	1014	L18-D4-S	1057	BEZ235	0.00790778	20354
12510	21/01/2016 23:00	11886	25/01/2016 23:00	6231	906793	A375	150	231	Glo	4	1015	L18-D5-S	1057	BEZ235	0.00250088	19609
12510	21/01/2016 23:00	11886	25/01/2016 23:00	6231	906793	A375	150	231	Glo	4	1016	L18-D6-S	1057	BEZ235	0.000790917	21500
12510	21/01/2016 23:00	11886	25/01/2016 23:00	6231	906793	A375	150	231	Glo	4	1017	L18-D7-S	1057	BEZ235	0.000250132	22169
12510	21/01/2016 23:00	11886	25/01/2016 23:00	6231	906793	A375	150	231	Glo	4	1018	NC-1	4000	DMSO	NA	19398
12510	21/01/2016 23:00	11886	25/01/2016 23:00	6231	906793	A375	150	231	Glo	4	1019	L42-D1-S	1510	Lisitinib	10	10033
12510	21/01/2016 23:00	11886	25/01/2016 23:00	6231	906793	A375	150	231	Glo	4	1020	L42-D2-S	1510	Lisitinib	3.16256	15958
12510	21/01/2016 23:00	11886	25/01/2016 23:00	6231	906793	A375	150	231	Glo	4	1021	L42-D3-S	1510	Lisitinib	1.00018	14811
12510	21/01/2016 23:00	11886	25/01/2016 23:00	6231	906793	A375	150	231	Glo	4	1022	L42-D4-S	1510	Lisitinib	0.316311	12939
12510	21/01/2016 23:00	11886	25/01/2016 23:00	6231	906793	A375	150	231	Glo	4	1023	L42-D5-S	1510	Lisitinib	0.100035	18156
12510	21/01/2016 23:00	11886	25/01/2016 23:00	6231	906793	A375	150	231	Glo	4	1024	L42-D6-S	1510	Lisitinib	0.0316367	20163
12510	21/01/2016 23:00	11886	25/01/2016 23:00	6231	906793	A375	150	231	Glo	4	1025	L42-D7-S	1510	Lisitinib	0.0100053	18538
12510	21/01/2016 23:00	11886	25/01/2016 23:00	6231	906793	A375	150	231	Glo	4	1040	NC-1	4000	DMSO	NA	18060
12510	21/01/2016 23:00	11886	25/01/2016 23:00	6231	906793	A375	150	231	Glo	4	1041	NC-1	4000	DMSO	NA	18825
12510	21/01/2016 23:00	11886	25/01/2016 23:00	6231	906793	A375	150	231	Glo	4	1042	NC-1	4000	DMSO	NA	18729
12510	21/01/2016 23:00	11886	25/01/2016 23:00	6231	906793	A375	150	231	Glo	4	1043	NC-1	4000	DMSO	NA	17487
12510	21/01/2016 23:00	11886	25/01/2016 23:00	6231	906793	A375	150	231	Glo	4	1044	PC2-D1-S	1034	Staurosporine	2	1815
12510	21/01/2016 23:00	11886	25/01/2016 23:00	6231	906793	A375	150	231	Glo	4	1045	PC1-D1-S	1862	MG-132	4	1242
12510	21/01/2016 23:00	11886	25/01/2016 23:00	6231	906793	A375	150	231	Glo	4	1046	NC-1	4000	DMSO	NA	16435
12510	21/01/2016 23:00	11886	25/01/2016 23:00	6231	906793	A375	150	231	Glo	4	1047	NC-1	4000	DMSO	NA	16340
12510	21/01/2016 23:00	11886	25/01/2016 23:00	6231	906793	A375	150	231	Glo	4	1055	UN-USED	NA	NA	NA	21214
12510	21/01/2016 23:00	11886	25/01/2016 23:00	6231	906793	A375	150	231	Glo	4	1056	UN-USED	NA	NA	NA	24750
12510	21/01/2016 23:00	11886	25/01/2016 23:00	6231	906793	A375	150	231	Glo	4	1057	B	NA	NA	NA	96
12510	21/01/2016 23:00	11886	25/01/2016 23:00	6231	906793	A375	150	231	Glo	4	1058	UN-USED	NA	NA	NA	27904
12510	21/01/2016 23:00	11886	25/01/2016 23:00	6231	906793	A375	150	231	Glo	4	1059	NC-1	4000	DMSO	NA	23316
12510	21/01/2016 23:00	11886	25/01/2016 23:00	6231	906793	A375	150	231	Glo	4	1060	L19-D1-S	1058	GDC0941	10	6306
12510	21/01/2016 23:00	11886	25/01/2016 23:00	6231	906793	A375	150	231	Glo	4	1061	L19-D2-S	1058	GDC0941	3.16256	7740
12510	21/01/2016 23:00	11886	25/01/2016 23:00	6231	906793	A375	150	231	Glo	4	1062	L19-D3-S	1058	GDC0941	1.00018	13760
12510	21/01/2016 23:00	11886	25/01/2016 23:00	6231	906793	A375	150	231	Glo	4	1063	L19-D4-S	1058	GDC0941	0.316311	20258
12510	21/01/2016 23:00	11886	25/01/2016 23:00	6231	906793	A375	150	231	Glo	4	1064	L19-D5-S	1058	GDC0941	0.100035	20927
12510	21/01/2016 23:00	11886	25/01/2016 23:00	6231	906793	A375	150	231	Glo	4	1065	L19-D6-S	1058	GDC0941	0.0316367	18920
12510	21/01/2016 23:00	11886	25/01/2016 23:00	6231	906793	A375	150	231	Glo	4	1066	L19-D7-S	1058	GDC0941	0.0100053	20163
12510	21/01/2016 23:00	11886	25/01/2016 23:00	6231	906793	A375	150	231	Glo	4	1102	NC-1	4000	DMSO	NA	21787
12510	21/01/2016 23:00	11886	25/01/2016 23:00	6231	906793	A375	150	231	Glo	4	1103	UN-USED	NA	NA	NA	21978
12510	21/01/2016 23:00	11886	25/01/2016 23:00	6231	906793	A375	150	231	Glo	4	1104	UN-USED	NA	NA	NA	28573
12510	21/01/2016 23:00	11886	25/01/2016 23:00	6231	906793	A375	150	231	Glo	4	1105	B	NA	NA	NA	191
12510	21/01/2016 23:00	11886	25/01/2016 23:00	6231	906793	A375	150	231	Glo	4	1106	UN-USED	NA	NA	NA	25419
12510	21/01/2016 23:00	11886	25/01/2016 23:00	6231	906793	A375	150	231	Glo	4	1107	NC-1	4000	DMSO	NA	23890
12510	21/01/2016 23:00	11886	25/01/2016 23:00	6231	906793	A375	150	231	Glo	4	1150	NC-1	4000	DMSO	NA	19780
12510	21/01/2016 23:00	11886	25/01/2016 23:00	6231	906793	A375	150	231	Glo	4	1151	UN-USED	NA	NA	NA	24463
12510	21/01/2016 23:00	11886	25/01/2016 23:00	6231	906793	A375	150	231	Glo	4	1152	UN-USED	NA	NA	NA	19780
12510	21/01/2016 23:00	11886	25/01/2016 23:00	6231	906793	A375	150	231	Glo	4	1153	B	NA	NA	NA	287
12510	21/01/2016 23:00	11886	25/01/2016 23:00	6231	906793	A375	150	231	Glo	4	1154	UN-USED	NA	NA	NA	25610
12510	21/01/2016 23:00	11886	25/01/2016 23:00	6231	906793	A375	150	231	Glo	4	1155	L21-D1-S	1060	PD-0325901	0.25	7835
12510	21/01/2016 23:00	11886	25/01/2016 23:00	6231	906793	A375	150	231	Glo	4	1156	L21-D2-S	1060	PD-0325901	0.0790639	6975
12510	21/01/2016 23:00	11886	25/01/2016 23:00	6231	906793	A375	150	231	Glo	4	1157	L21-D3-S	1060	PD-0325901	0.0250044	6593
12510	21/01/2016 23:00	11886	25/01/2016 23:00	6231	906793	A375	150	231	Glo	4	1158	L21-D4-S	1060	PD-0325901	0.00790778	10606
12510	21/01/2016 23:00	11886	25/01/2016 23:00	6231	906793	A375	150	231	Glo	4	1159	L21-D5-S	1060	PD-0325901	0.00250088	20067
12510	21/01/2016 23:00	11886	25/01/2016 23:00	6231	906793	A375	150	231	Glo	4	1160	L21-D6-S	1060	PD-0325901	0.000790917	23985
12510	21/01/2016 23:00	11886	25/01/2016 23:00	6231	906793	A375	150	231	Glo	4	1161	L21-D7-S	1060	PD-0325901	0.000250132	18729
12510	21/01/2016 23:00	11886	25/01/2016 23:00	6231	906793	A375	150	231	Glo	4	1162	NC-1	4000	DMSO	NA	19302
12510	21/01/2016 23:00	11886	25/01/2016 23:00	6231	906793	A375	150	231	Glo	4	1163	NC-1	4000	DMSO	NA	23125
12510	21/01/2016 23:00	11886	25/01/2016 23:00	6231	906793	A375	150	231	Glo	4	1164	PC1-D1-S	1862	MG-132	4	1242
12510	21/01/2016 23:00	11886	25/01/2016 23:00	6231	906793	A375	150	231	Glo	4	1165	PC2-D1-S	1034	Staurosporine	2	1792
12510	21/01/2016 23:00	11886	25/01/2016 23:00	6231	906793	A375	150	231	Glo	4	1166	NC-1	4000	DMSO	NA	19685
12510	21/01/2016 23:00	11886	25/01/2016 23:00	6231	906793	A375	150	231	Glo	4	1167	NC-1	4000	DMSO	NA	18633
12510	21/01/2016 23:00	11886	25/01/2016 23:00	6231	906793	A375	150	231	Glo	4	1168	NC-1	4000	DMSO	NA	23316
12510	21/01/2016 23:00	11886	25/01/2016 23:00	6231	906793	A375	150	231	Glo	4	1176	PC2-D5-S	1034	Staurosporine	0.0078125	18060
12510	21/01/2016 23:00	11886	25/01/2016 23:00	6231	906793	A375	150	231	Glo	4	1198	NC-1	4000	DMSO	NA	19111
12510	21/01/2016 23:00	11886	25/01/2016 23:00	6231	906793	A375	150	231	Glo	4	1199	UN-USED	NA	NA	NA	25323
12510	21/01/2016 23:00	11886	25/01/2016 23:00	6231	906793	A375	150	231	Glo	4	1200	UN-USED	NA	NA	NA	24654
12510	21/01/2016 23:00	11886	25/01/2016 23:00	6231	906793	A375	150	231	Glo	4	1201	B	NA	NA	NA	100
12510	21/01/2016 23:00	11886	25/01/2016 23:00	6231	906793	A375	150	231	Glo	4	1202	UN-USED	NA	NA	NA	25992
12510	21/01/2016 23:00	11886	25/01/2016 23:00	6231	906793	A375	150	231	Glo	4	1203	NC-1	4000	DMSO	NA	21692
12510	21/01/2016 23:00	11886	25/01/2016 23:00	6231	906793	A375	150	231	Glo	4	1204	PC2-D1-S	1034	Staurosporine	2	669
12510	21/01/2016 23:00	11886	25/01/2016 23:00	6231	906793	A375	150	231	Glo	4	1205	PC2-D2-S	1034	Staurosporine	0.5	5351
12510	21/01/2016 23:00	11886	25/01/2016 23:00	6231	906793	A375	150	231	Glo	4	1206	PC2-D3-S	1034	Staurosporine	0.125	7357
12510	21/01/2016 23:00	11886	25/01/2016 23:00	6231	906793	A375	150	231	Glo	4	1207	PC2-D4-S	1034	Staurosporine	0.03125	11657
12510	21/01/2016 23:00	11886	25/01/2016 23:00	6231	906793	A375	150	231	Glo	4	1208	PC2-D5-S	1034	Staurosporine	0.0078125	16424
12510	21/01/2016 23:00	11886	25/01/2016 23:00	6231	906793	A375	150	231	Glo	4	1209	NC-1	4000	DMSO	NA	19780
12510	21/01/2016 23:00	11886	25/01/2016 23:00	6231	906793	A375	150	231	Glo	4	1224	PC2-D4-S	1034	Staurosporine	0.03125	11084
12510	21/01/2016 23:00	11886	25/01/2016 23:00	6231	906793	A375	150	231	Glo	4	1225	NC-0	NA	NA	NA	19207
12510	21/01/2016 23:00	11886	25/01/2016 23:00	6231	906793	A375	150	231	Glo	4	1226	NC-1	4000	DMSO	NA	19111
12510	21/01/2016 23:00	11886	25/01/2016 23:00	6231	906793	A375	150	231	Glo	4	1227	NC-1	4000	DMSO	NA	21309
12510	21/01/2016 23:00	11886	25/01/2016 23:00	6231	906793	A375	150	231	Glo	4	1228	NC-1	4000	DMSO	NA	20163
12510	21/01/2016 23:00	11886	25/01/2016 23:00	6231	906793	A375	150	231	Glo	4	1229	PC1-D1-S	1862	MG-132	4	1815
12510	21/01/2016 23:00	11886	25/01/2016 23:00	6231	906793	A375	150	231	Glo	4	1230	PC2-D1-S	1034	Staurosporine	2	1529
12510	21/01/2016 23:00	11886	25/01/2016 23:00	6231	906793	A375	150	231	Glo	4	1231	NC-1	4000	DMSO	NA	21309
12510	21/01/2016 23:00	11886	25/01/2016 23:00	6231	906793	A375	150	231	Glo	4	1246	NC-1	4000	DMSO	NA	20831
12510	21/01/2016 23:00	11886	25/01/2016 23:00	6231	906793	A375	150	231	Glo	4	1247	UN-USED	NA	NA	NA	24272
12510	21/01/2016 23:00	11886	25/01/2016 23:00	6231	906793	A375	150	231	Glo	4	1248	UN-USED	NA	NA	NA	22934
12510	21/01/2016 23:00	11886	25/01/2016 23:00	6231	906793	A375	150	231	Glo	4	1249	B	NA	NA	NA	191
12510	21/01/2016 23:00	11886	25/01/2016 23:00	6231	906793	A375	150	231	Glo	4	1250	UN-USED	NA	NA	NA	29146
12510	21/01/2016 23:00	11886	25/01/2016 23:00	6231	906793	A375	150	231	Glo	4	1272	PC2-D3-S	1034	Staurosporine	0.125	7835
12510	21/01/2016 23:00	11886	25/01/2016 23:00	6231	906793	A375	150	231	Glo	4	1273	NC-1	4000	DMSO	NA	21692
12510	21/01/2016 23:00	11886	25/01/2016 23:00	6231	906793	A375	150	231	Glo	4	1295	UN-USED	NA	NA	NA	25992
12510	21/01/2016 23:00	11886	25/01/2016 23:00	6231	906793	A375	150	231	Glo	4	1296	UN-USED	NA	NA	NA	23412
12510	21/01/2016 23:00	11886	25/01/2016 23:00	6231	906793	A375	150	231	Glo	4	1297	B	NA	NA	NA	0
12510	21/01/2016 23:00	11886	25/01/2016 23:00	6231	906793	A375	150	231	Glo	4	1298	UN-USED	NA	NA	NA	26470
12510	21/01/2016 23:00	11886	25/01/2016 23:00	6231	906793	A375	150	231	Glo	4	1320	PC2-D2-S	1034	Staurosporine	0.5	4777
12510	21/01/2016 23:00	11886	25/01/2016 23:00	6231	906793	A375	150	231	Glo	4	1321	NC-1	4000	DMSO	NA	19589
12510	21/01/2016 23:00	11886	25/01/2016 23:00	6231	906793	A375	150	231	Glo	4	1343	UN-USED	NA	NA	NA	22265
12510	21/01/2016 23:00	11886	25/01/2016 23:00	6231	906793	A375	150	231	Glo	4	1344	UN-USED	NA	NA	NA	22838
12510	21/01/2016 23:00	11886	25/01/2016 23:00	6231	906793	A375	150	231	Glo	4	1345	B	NA	NA	NA	478
12510	21/01/2016 23:00	11886	25/01/2016 23:00	6231	906793	A375	150	231	Glo	4	1346	UN-USED	NA	NA	NA	25992
12510	21/01/2016 23:00	11886	25/01/2016 23:00	6231	906793	A375	150	231	Glo	4	1361	NC-1	4000	DMSO	NA	20545
12510	21/01/2016 23:00	11886	25/01/2016 23:00	6231	906793	A375	150	231	Glo	4	1362	NC-1	4000	DMSO	NA	21405
12510	21/01/2016 23:00	11886	25/01/2016 23:00	6231	906793	A375	150	231	Glo	4	1363	PC2-D1-S	1034	Staurosporine	2	1529
12510	21/01/2016 23:00	11886	25/01/2016 23:00	6231	906793	A375	150	231	Glo	4	1364	PC1-D1-S	1862	MG-132	4	995
12510	21/01/2016 23:00	11886	25/01/2016 23:00	6231	906793	A375	150	231	Glo	4	1365	NC-1	4000	DMSO	NA	20736
12510	21/01/2016 23:00	11886	25/01/2016 23:00	6231	906793	A375	150	231	Glo	4	1366	NC-1	4000	DMSO	NA	23985
12510	21/01/2016 23:00	11886	25/01/2016 23:00	6231	906793	A375	150	231	Glo	4	1367	NC-1	4000	DMSO	NA	22647
12510	21/01/2016 23:00	11886	25/01/2016 23:00	6231	906793	A375	150	231	Glo	4	1368	PC2-D1-S	1034	Staurosporine	2	1294
12510	21/01/2016 23:00	11886	25/01/2016 23:00	6231	906793	A375	150	231	Glo	4	1376	NC-1	4000	DMSO	NA	21214
12510	21/01/2016 23:00	11886	25/01/2016 23:00	6231	906793	A375	150	231	Glo	4	1391	UN-USED	NA	NA	NA	22552
12510	21/01/2016 23:00	11886	25/01/2016 23:00	6231	906793	A375	150	231	Glo	4	1392	UN-USED	NA	NA	NA	23794
12510	21/01/2016 23:00	11886	25/01/2016 23:00	6231	906793	A375	150	231	Glo	4	1393	B	NA	NA	NA	96
12510	21/01/2016 23:00	11886	25/01/2016 23:00	6231	906793	A375	150	231	Glo	4	1394	UN-USED	NA	NA	NA	26948
12510	21/01/2016 23:00	11886	25/01/2016 23:00	6231	906793	A375	150	231	Glo	4	1395	NC-1	4000	DMSO	NA	23985
12510	21/01/2016 23:00	11886	25/01/2016 23:00	6231	906793	A375	150	231	Glo	4	1396	NC-1	4000	DMSO	NA	26088
12510	21/01/2016 23:00	11886	25/01/2016 23:00	6231	906793	A375	150	231	Glo	4	1397	NC-1	4000	DMSO	NA	23030
12510	21/01/2016 23:00	11886	25/01/2016 23:00	6231	906793	A375	150	231	Glo	4	1398	NC-1	4000	DMSO	NA	23890
12510	21/01/2016 23:00	11886	25/01/2016 23:00	6231	906793	A375	150	231	Glo	4	1399	PC1-D1-S	1862	MG-132	4	1529
12510	21/01/2016 23:00	11886	25/01/2016 23:00	6231	906793	A375	150	231	Glo	4	1400	PC2-D1-S	1034	Staurosporine	2	1338
12510	21/01/2016 23:00	11886	25/01/2016 23:00	6231	906793	A375	150	231	Glo	4	1401	NC-1	4000	DMSO	NA	23890
12510	21/01/2016 23:00	11886	25/01/2016 23:00	6231	906793	A375	150	231	Glo	4	1416	NC-1	4000	DMSO	NA	19780
12510	21/01/2016 23:00	11886	25/01/2016 23:00	6231	906793	A375	150	231	Glo	4	1424	NC-1	4000	DMSO	NA	21978
12510	21/01/2016 23:00	11886	25/01/2016 23:00	6231	906793	A375	150	231	Glo	4	1432	NC-1	4000	DMSO	NA	24081
12510	21/01/2016 23:00	11886	25/01/2016 23:00	6231	906793	A375	150	231	Glo	4	1433	NC-1	4000	DMSO	NA	21692
12510	21/01/2016 23:00	11886	25/01/2016 23:00	6231	906793	A375	150	231	Glo	4	1434	NC-1	4000	DMSO	NA	22074
12510	21/01/2016 23:00	11886	25/01/2016 23:00	6231	906793	A375	150	231	Glo	4	1435	PC2-D1-S	1034	Staurosporine	2	1624
12510	21/01/2016 23:00	11886	25/01/2016 23:00	6231	906793	A375	150	231	Glo	4	1436	PC1-D1-S	1862	MG-132	4	1194
12510	21/01/2016 23:00	11886	25/01/2016 23:00	6231	906793	A375	150	231	Glo	4	1437	NC-1	4000	DMSO	NA	24654
12510	21/01/2016 23:00	11886	25/01/2016 23:00	6231	906793	A375	150	231	Glo	4	1438	NC-1	4000	DMSO	NA	23890
12510	21/01/2016 23:00	11886	25/01/2016 23:00	6231	906793	A375	150	231	Glo	4	1439	UN-USED	NA	NA	NA	28191
12510	21/01/2016 23:00	11886	25/01/2016 23:00	6231	906793	A375	150	231	Glo	4	1440	UN-USED	NA	NA	NA	18442
12510	21/01/2016 23:00	11886	25/01/2016 23:00	6231	906793	A375	150	231	Glo	4	1441	UN-USED	NA	NA	NA	96
12510	21/01/2016 23:00	11886	25/01/2016 23:00	6231	906793	A375	150	231	Glo	4	1442	UN-USED	NA	NA	NA	26279
12510	21/01/2016 23:00	11886	25/01/2016 23:00	6231	906793	A375	150	231	Glo	4	1443	UN-USED	NA	NA	NA	30962
12510	21/01/2016 23:00	11886	25/01/2016 23:00	6231	906793	A375	150	231	Glo	4	1444	UN-USED	NA	NA	NA	26757
12510	21/01/2016 23:00	11886	25/01/2016 23:00	6231	906793	A375	150	231	Glo	4	1445	UN-USED	NA	NA	NA	24845
12510	21/01/2016 23:00	11886	25/01/2016 23:00	6231	906793	A375	150	231	Glo	4	1446	UN-USED	NA	NA	NA	25897
12510	21/01/2016 23:00	11886	25/01/2016 23:00	6231	906793	A375	150	231	Glo	4	1447	UN-USED	NA	NA	NA	27139
12510	21/01/2016 23:00	11886	25/01/2016 23:00	6231	906793	A375	150	231	Glo	4	1448	UN-USED	NA	NA	NA	23030
12510	21/01/2016 23:00	11886	25/01/2016 23:00	6231	906793	A375	150	231	Glo	4	1449	UN-USED	NA	NA	NA	27139
12510	21/01/2016 23:00	11886	25/01/2016 23:00	6231	906793	A375	150	231	Glo	4	1450	UN-USED	NA	NA	NA	26470
12510	21/01/2016 23:00	11886	25/01/2016 23:00	6231	906793	A375	150	231	Glo	4	1451	UN-USED	NA	NA	NA	26470
12510	21/01/2016 23:00	11886	25/01/2016 23:00	6231	906793	A375	150	231	Glo	4	1452	UN-USED	NA	NA	NA	30293
12510	21/01/2016 23:00	11886	25/01/2016 23:00	6231	906793	A375	150	231	Glo	4	1453	UN-USED	NA	NA	NA	27617
12510	21/01/2016 23:00	11886	25/01/2016 23:00	6231	906793	A375	150	231	Glo	4	1454	UN-USED	NA	NA	NA	25706
12510	21/01/2016 23:00	11886	25/01/2016 23:00	6231	906793	A375	150	231	Glo	4	1455	UN-USED	NA	NA	NA	22265
12510	21/01/2016 23:00	11886	25/01/2016 23:00	6231	906793	A375	150	231	Glo	4	1456	UN-USED	NA	NA	NA	25801
12510	21/01/2016 23:00	11886	25/01/2016 23:00	6231	906793	A375	150	231	Glo	4	1457	UN-USED	NA	NA	NA	24559
12510	21/01/2016 23:00	11886	25/01/2016 23:00	6231	906793	A375	150	231	Glo	4	1458	UN-USED	NA	NA	NA	25228
12510	21/01/2016 23:00	11886	25/01/2016 23:00	6231	906793	A375	150	231	Glo	4	1459	UN-USED	NA	NA	NA	24272
12510	21/01/2016 23:00	11886	25/01/2016 23:00	6231	906793	A375	150	231	Glo	4	1460	UN-USED	NA	NA	NA	24845
12510	21/01/2016 23:00	11886	25/01/2016 23:00	6231	906793	A375	150	231	Glo	4	1461	UN-USED	NA	NA	NA	25419
12510	21/01/2016 23:00	11886	25/01/2016 23:00	6231	906793	A375	150	231	Glo	4	1462	UN-USED	NA	NA	NA	26661
12510	21/01/2016 23:00	11886	25/01/2016 23:00	6231	906793	A375	150	231	Glo	4	1463	UN-USED	NA	NA	NA	26757
12510	21/01/2016 23:00	11886	25/01/2016 23:00	6231	906793	A375	150	231	Glo	4	1464	UN-USED	NA	NA	NA	26470
12510	21/01/2016 23:00	11886	25/01/2016 23:00	6231	906793	A375	150	231	Glo	4	1465	UN-USED	NA	NA	NA	28191
12510	21/01/2016 23:00	11886	25/01/2016 23:00	6231	906793	A375	150	231	Glo	4	1466	UN-USED	NA	NA	NA	24463
12510	21/01/2016 23:00	11886	25/01/2016 23:00	6231	906793	A375	150	231	Glo	4	1467	UN-USED	NA	NA	NA	23603
12510	21/01/2016 23:00	11886	25/01/2016 23:00	6231	906793	A375	150	231	Glo	4	1468	UN-USED	NA	NA	NA	23794
12510	21/01/2016 23:00	11886	25/01/2016 23:00	6231	906793	A375	150	231	Glo	4	1469	UN-USED	NA	NA	NA	24654
12510	21/01/2016 23:00	11886	25/01/2016 23:00	6231	906793	A375	150	231	Glo	4	1470	UN-USED	NA	NA	NA	25801
12510	21/01/2016 23:00	11886	25/01/2016 23:00	6231	906793	A375	150	231	Glo	4	1471	UN-USED	NA	NA	NA	26088
12510	21/01/2016 23:00	11886	25/01/2016 23:00	6231	906793	A375	150	231	Glo	4	1472	UN-USED	NA	NA	NA	25514
12510	21/01/2016 23:00	11886	25/01/2016 23:00	6231	906793	A375	150	231	Glo	4	1473	UN-USED	NA	NA	NA	23603
12510	21/01/2016 23:00	11886	25/01/2016 23:00	6231	906793	A375	150	231	Glo	4	1474	UN-USED	NA	NA	NA	25514
12510	21/01/2016 23:00	11886	25/01/2016 23:00	6231	906793	A375	150	231	Glo	4	1475	UN-USED	NA	NA	NA	25037
12510	21/01/2016 23:00	11886	25/01/2016 23:00	6231	906793	A375	150	231	Glo	4	1476	UN-USED	NA	NA	NA	25992
12510	21/01/2016 23:00	11886	25/01/2016 23:00	6231	906793	A375	150	231	Glo	4	1477	UN-USED	NA	NA	NA	26375
12510	21/01/2016 23:00	11886	25/01/2016 23:00	6231	906793	A375	150	231	Glo	4	1478	UN-USED	NA	NA	NA	26757
12510	21/01/2016 23:00	11886	25/01/2016 23:00	6231	906793	A375	150	231	Glo	4	1479	UN-USED	NA	NA	NA	25228
12510	21/01/2016 23:00	11886	25/01/2016 23:00	6231	906793	A375	150	231	Glo	4	1480	UN-USED	NA	NA	NA	21405
12510	21/01/2016 23:00	11886	25/01/2016 23:00	6231	906793	A375	150	231	Glo	4	1481	UN-USED	NA	NA	NA	23030
12510	21/01/2016 23:00	11886	25/01/2016 23:00	6231	906793	A375	150	231	Glo	4	1482	UN-USED	NA	NA	NA	24368
12510	21/01/2016 23:00	11886	25/01/2016 23:00	6231	906793	A375	150	231	Glo	4	1483	UN-USED	NA	NA	NA	23603
12510	21/01/2016 23:00	11886	25/01/2016 23:00	6231	906793	A375	150	231	Glo	4	1484	UN-USED	NA	NA	NA	22647
12510	21/01/2016 23:00	11886	25/01/2016 23:00	6231	906793	A375	150	231	Glo	4	1485	UN-USED	NA	NA	NA	27617
12510	21/01/2016 23:00	11886	25/01/2016 23:00	6231	906793	A375	150	231	Glo	4	1486	UN-USED	NA	NA	NA	25419
12510	21/01/2016 23:00	11886	25/01/2016 23:00	6231	906793	A375	150	231	Glo	4	1487	UN-USED	NA	NA	NA	27999
12510	21/01/2016 23:00	11886	25/01/2016 23:00	6231	906793	A375	150	231	Glo	4	1488	UN-USED	NA	NA	NA	12422
12510	21/01/2016 23:00	11886	25/01/2016 23:00	6231	906793	A375	150	231	Glo	4	1489	UN-USED	NA	NA	NA	96
12510	21/01/2016 23:00	11886	25/01/2016 23:00	6231	906793	A375	150	231	Glo	4	1490	UN-USED	NA	NA	NA	0
12510	21/01/2016 23:00	11886	25/01/2016 23:00	6231	906793	A375	150	231	Glo	4	1491	UN-USED	NA	NA	NA	12231
12510	21/01/2016 23:00	11886	25/01/2016 23:00	6231	906793	A375	150	231	Glo	4	1492	UN-USED	NA	NA	NA	11944
12510	21/01/2016 23:00	11886	25/01/2016 23:00	6231	906793	A375	150	231	Glo	4	1493	UN-USED	NA	NA	NA	17104
12510	21/01/2016 23:00	11886	25/01/2016 23:00	6231	906793	A375	150	231	Glo	4	1494	UN-USED	NA	NA	NA	20640
12510	21/01/2016 23:00	11886	25/01/2016 23:00	6231	906793	A375	150	231	Glo	4	1495	UN-USED	NA	NA	NA	17104
12510	21/01/2016 23:00	11886	25/01/2016 23:00	6231	906793	A375	150	231	Glo	4	1496	UN-USED	NA	NA	NA	18633
12510	21/01/2016 23:00	11886	25/01/2016 23:00	6231	906793	A375	150	231	Glo	4	1497	UN-USED	NA	NA	NA	14811
12510	21/01/2016 23:00	11886	25/01/2016 23:00	6231	906793	A375	150	231	Glo	4	1498	UN-USED	NA	NA	NA	21500
12510	21/01/2016 23:00	11886	25/01/2016 23:00	6231	906793	A375	150	231	Glo	4	1499	UN-USED	NA	NA	NA	19876
12510	21/01/2016 23:00	11886	25/01/2016 23:00	6231	906793	A375	150	231	Glo	4	1500	UN-USED	NA	NA	NA	18060
12510	21/01/2016 23:00	11886	25/01/2016 23:00	6231	906793	A375	150	231	Glo	4	1501	UN-USED	NA	NA	NA	20067
12510	21/01/2016 23:00	11886	25/01/2016 23:00	6231	906793	A375	150	231	Glo	4	1502	UN-USED	NA	NA	NA	23699
12510	21/01/2016 23:00	11886	25/01/2016 23:00	6231	906793	A375	150	231	Glo	4	1503	UN-USED	NA	NA	NA	17869
12510	21/01/2016 23:00	11886	25/01/2016 23:00	6231	906793	A375	150	231	Glo	4	1504	UN-USED	NA	NA	NA	21596
12510	21/01/2016 23:00	11886	25/01/2016 23:00	6231	906793	A375	150	231	Glo	4	1505	UN-USED	NA	NA	NA	21118
12510	21/01/2016 23:00	11886	25/01/2016 23:00	6231	906793	A375	150	231	Glo	4	1506	UN-USED	NA	NA	NA	18442
12510	21/01/2016 23:00	11886	25/01/2016 23:00	6231	906793	A375	150	231	Glo	4	1507	UN-USED	NA	NA	NA	22265
12510	21/01/2016 23:00	11886	25/01/2016 23:00	6231	906793	A375	150	231	Glo	4	1508	UN-USED	NA	NA	NA	22456
12510	21/01/2016 23:00	11886	25/01/2016 23:00	6231	906793	A375	150	231	Glo	4	1509	UN-USED	NA	NA	NA	19398
12510	21/01/2016 23:00	11886	25/01/2016 23:00	6231	906793	A375	150	231	Glo	4	1510	UN-USED	NA	NA	NA	21500
12510	21/01/2016 23:00	11886	25/01/2016 23:00	6231	906793	A375	150	231	Glo	4	1511	UN-USED	NA	NA	NA	21692
12510	21/01/2016 23:00	11886	25/01/2016 23:00	6231	906793	A375	150	231	Glo	4	1512	UN-USED	NA	NA	NA	22297
12510	21/01/2016 23:00	11886	25/01/2016 23:00	6231	906793	A375	150	231	Glo	4	1513	UN-USED	NA	NA	NA	21787
12510	21/01/2016 23:00	11886	25/01/2016 23:00	6231	906793	A375	150	231	Glo	4	1514	UN-USED	NA	NA	NA	24081
12510	21/01/2016 23:00	11886	25/01/2016 23:00	6231	906793	A375	150	231	Glo	4	1515	UN-USED	NA	NA	NA	18251
12510	21/01/2016 23:00	11886	25/01/2016 23:00	6231	906793	A375	150	231	Glo	4	1516	UN-USED	NA	NA	NA	19398
12510	21/01/2016 23:00	11886	25/01/2016 23:00	6231	906793	A375	150	231	Glo	4	1517	UN-USED	NA	NA	NA	19589
12510	21/01/2016 23:00	11886	25/01/2016 23:00	6231	906793	A375	150	231	Glo	4	1518	UN-USED	NA	NA	NA	25132
12510	21/01/2016 23:00	11886	25/01/2016 23:00	6231	906793	A375	150	231	Glo	4	1519	UN-USED	NA	NA	NA	24176
12510	21/01/2016 23:00	11886	25/01/2016 23:00	6231	906793	A375	150	231	Glo	4	1520	UN-USED	NA	NA	NA	22456
12510	21/01/2016 23:00	11886	25/01/2016 23:00	6231	906793	A375	150	231	Glo	4	1521	UN-USED	NA	NA	NA	19589
12510	21/01/2016 23:00	11886	25/01/2016 23:00	6231	906793	A375	150	231	Glo	4	1522	UN-USED	NA	NA	NA	22647
12510	21/01/2016 23:00	11886	25/01/2016 23:00	6231	906793	A375	150	231	Glo	4	1523	UN-USED	NA	NA	NA	22647
12510	21/01/2016 23:00	11886	25/01/2016 23:00	6231	906793	A375	150	231	Glo	4	1524	UN-USED	NA	NA	NA	21978
12510	21/01/2016 23:00	11886	25/01/2016 23:00	6231	906793	A375	150	231	Glo	4	1525	UN-USED	NA	NA	NA	21023
12510	21/01/2016 23:00	11886	25/01/2016 23:00	6231	906793	A375	150	231	Glo	4	1526	UN-USED	NA	NA	NA	20449
12510	21/01/2016 23:00	11886	25/01/2016 23:00	6231	906793	A375	150	231	Glo	4	1527	UN-USED	NA	NA	NA	19494
12510	21/01/2016 23:00	11886	25/01/2016 23:00	6231	906793	A375	150	231	Glo	4	1528	UN-USED	NA	NA	NA	21214
12510	21/01/2016 23:00	11886	25/01/2016 23:00	6231	906793	A375	150	231	Glo	4	1529	UN-USED	NA	NA	NA	22361
12510	21/01/2016 23:00	11886	25/01/2016 23:00	6231	906793	A375	150	231	Glo	4	1530	UN-USED	NA	NA	NA	21405
12510	21/01/2016 23:00	11886	25/01/2016 23:00	6231	906793	A375	150	231	Glo	4	1531	UN-USED	NA	NA	NA	18633
12510	21/01/2016 23:00	11886	25/01/2016 23:00	6231	906793	A375	150	231	Glo	4	1532	UN-USED	NA	NA	NA	16435
12510	21/01/2016 23:00	11886	25/01/2016 23:00	6231	906793	A375	150	231	Glo	4	1533	UN-USED	NA	NA	NA	20640
12510	21/01/2016 23:00	11886	25/01/2016 23:00	6231	906793	A375	150	231	Glo	4	1534	UN-USED	NA	NA	NA	15384
12510	21/01/2016 23:00	11886	25/01/2016 23:00	6231	906793	A375	150	231	Glo	4	1535	UN-USED	NA	NA	NA	11371
12510	21/01/2016 23:00	11886	25/01/2016 23:00	6231	906793	A375	150	231	Glo	4	1536	UN-USED	NA	NA	NA	382
12512	21/01/2016 23:00	11887	25/01/2016 23:00	2878	905949	A549	100	231	Glo	4	1	UN-USED	NA	NA	NA	96
12512	21/01/2016 23:00	11887	25/01/2016 23:00	2878	905949	A549	100	231	Glo	4	2	UN-USED	NA	NA	NA	0
12512	21/01/2016 23:00	11887	25/01/2016 23:00	2878	905949	A549	100	231	Glo	4	3	UN-USED	NA	NA	NA	498
12512	21/01/2016 23:00	11887	25/01/2016 23:00	2878	905949	A549	100	231	Glo	4	4	UN-USED	NA	NA	NA	5829
12512	21/01/2016 23:00	11887	25/01/2016 23:00	2878	905949	A549	100	231	Glo	4	5	UN-USED	NA	NA	NA	5064
12512	21/01/2016 23:00	11887	25/01/2016 23:00	2878	905949	A549	100	231	Glo	4	6	UN-USED	NA	NA	NA	12326
12512	21/01/2016 23:00	11887	25/01/2016 23:00	2878	905949	A549	100	231	Glo	4	7	UN-USED	NA	NA	NA	8695
12512	21/01/2016 23:00	11887	25/01/2016 23:00	2878	905949	A549	100	231	Glo	4	8	UN-USED	NA	NA	NA	6880
12512	21/01/2016 23:00	11887	25/01/2016 23:00	2878	905949	A549	100	231	Glo	4	9	UN-USED	NA	NA	NA	9364
12512	21/01/2016 23:00	11887	25/01/2016 23:00	2878	905949	A549	100	231	Glo	4	10	UN-USED	NA	NA	NA	15289
12512	21/01/2016 23:00	11887	25/01/2016 23:00	2878	905949	A549	100	231	Glo	4	11	UN-USED	NA	NA	NA	15289
12512	21/01/2016 23:00	11887	25/01/2016 23:00	2878	905949	A549	100	231	Glo	4	12	UN-USED	NA	NA	NA	8408
12512	21/01/2016 23:00	11887	25/01/2016 23:00	2878	905949	A549	100	231	Glo	4	13	UN-USED	NA	NA	NA	9364
12512	21/01/2016 23:00	11887	25/01/2016 23:00	2878	905949	A549	100	231	Glo	4	14	UN-USED	NA	NA	NA	10702
12512	21/01/2016 23:00	11887	25/01/2016 23:00	2878	905949	A549	100	231	Glo	4	15	UN-USED	NA	NA	NA	15384
12512	21/01/2016 23:00	11887	25/01/2016 23:00	2878	905949	A549	100	231	Glo	4	16	UN-USED	NA	NA	NA	9842
12512	21/01/2016 23:00	11887	25/01/2016 23:00	2878	905949	A549	100	231	Glo	4	17	UN-USED	NA	NA	NA	6975
12512	21/01/2016 23:00	11887	25/01/2016 23:00	2878	905949	A549	100	231	Glo	4	18	UN-USED	NA	NA	NA	5351
12512	21/01/2016 23:00	11887	25/01/2016 23:00	2878	905949	A549	100	231	Glo	4	19	UN-USED	NA	NA	NA	8600
12512	21/01/2016 23:00	11887	25/01/2016 23:00	2878	905949	A549	100	231	Glo	4	20	UN-USED	NA	NA	NA	9173
12512	21/01/2016 23:00	11887	25/01/2016 23:00	2878	905949	A549	100	231	Glo	4	21	UN-USED	NA	NA	NA	10797
12512	21/01/2016 23:00	11887	25/01/2016 23:00	2878	905949	A549	100	231	Glo	4	22	UN-USED	NA	NA	NA	15384
12512	21/01/2016 23:00	11887	25/01/2016 23:00	2878	905949	A549	100	231	Glo	4	23	UN-USED	NA	NA	NA	12326
12512	21/01/2016 23:00	11887	25/01/2016 23:00	2878	905949	A549	100	231	Glo	4	24	UN-USED	NA	NA	NA	9746
12512	21/01/2016 23:00	11887	25/01/2016 23:00	2878	905949	A549	100	231	Glo	4	25	UN-USED	NA	NA	NA	11466
12512	21/01/2016 23:00	11887	25/01/2016 23:00	2878	905949	A549	100	231	Glo	4	26	UN-USED	NA	NA	NA	9746
12512	21/01/2016 23:00	11887	25/01/2016 23:00	2878	905949	A549	100	231	Glo	4	27	UN-USED	NA	NA	NA	7835
12512	21/01/2016 23:00	11887	25/01/2016 23:00	2878	905949	A549	100	231	Glo	4	28	UN-USED	NA	NA	NA	5542
12512	21/01/2016 23:00	11887	25/01/2016 23:00	2878	905949	A549	100	231	Glo	4	29	UN-USED	NA	NA	NA	9077
12512	21/01/2016 23:00	11887	25/01/2016 23:00	2878	905949	A549	100	231	Glo	4	30	UN-USED	NA	NA	NA	2198
12512	21/01/2016 23:00	11887	25/01/2016 23:00	2878	905949	A549	100	231	Glo	4	31	UN-USED	NA	NA	NA	6593
12512	21/01/2016 23:00	11887	25/01/2016 23:00	2878	905949	A549	100	231	Glo	4	32	UN-USED	NA	NA	NA	12326
12512	21/01/2016 23:00	11887	25/01/2016 23:00	2878	905949	A549	100	231	Glo	4	33	UN-USED	NA	NA	NA	8886
12512	21/01/2016 23:00	11887	25/01/2016 23:00	2878	905949	A549	100	231	Glo	4	34	UN-USED	NA	NA	NA	5924
12512	21/01/2016 23:00	11887	25/01/2016 23:00	2878	905949	A549	100	231	Glo	4	35	UN-USED	NA	NA	NA	8313
12512	21/01/2016 23:00	11887	25/01/2016 23:00	2878	905949	A549	100	231	Glo	4	36	UN-USED	NA	NA	NA	7931
12512	21/01/2016 23:00	11887	25/01/2016 23:00	2878	905949	A549	100	231	Glo	4	37	UN-USED	NA	NA	NA	9460
12512	21/01/2016 23:00	11887	25/01/2016 23:00	2878	905949	A549	100	231	Glo	4	38	UN-USED	NA	NA	NA	6688
12512	21/01/2016 23:00	11887	25/01/2016 23:00	2878	905949	A549	100	231	Glo	4	39	UN-USED	NA	NA	NA	4395
12512	21/01/2016 23:00	11887	25/01/2016 23:00	2878	905949	A549	100	231	Glo	4	40	UN-USED	NA	NA	NA	4491
12512	21/01/2016 23:00	11887	25/01/2016 23:00	2878	905949	A549	100	231	Glo	4	41	UN-USED	NA	NA	NA	3631
12512	21/01/2016 23:00	11887	25/01/2016 23:00	2878	905949	A549	100	231	Glo	4	42	UN-USED	NA	NA	NA	2293
12512	21/01/2016 23:00	11887	25/01/2016 23:00	2878	905949	A549	100	231	Glo	4	43	UN-USED	NA	NA	NA	1147
12512	21/01/2016 23:00	11887	25/01/2016 23:00	2878	905949	A549	100	231	Glo	4	44	UN-USED	NA	NA	NA	2102
12512	21/01/2016 23:00	11887	25/01/2016 23:00	2878	905949	A549	100	231	Glo	4	45	UN-USED	NA	NA	NA	597
12512	21/01/2016 23:00	11887	25/01/2016 23:00	2878	905949	A549	100	231	Glo	4	46	UN-USED	NA	NA	NA	191
12512	21/01/2016 23:00	11887	25/01/2016 23:00	2878	905949	A549	100	231	Glo	4	47	UN-USED	NA	NA	NA	382
12512	21/01/2016 23:00	11887	25/01/2016 23:00	2878	905949	A549	100	231	Glo	4	48	UN-USED	NA	NA	NA	96
12512	21/01/2016 23:00	11887	25/01/2016 23:00	2878	905949	A549	100	231	Glo	4	49	UN-USED	NA	NA	NA	0
12512	21/01/2016 23:00	11887	25/01/2016 23:00	2878	905949	A549	100	231	Glo	4	50	UN-USED	NA	NA	NA	11275
12512	21/01/2016 23:00	11887	25/01/2016 23:00	2878	905949	A549	100	231	Glo	4	51	UN-USED	NA	NA	NA	27971
12512	21/01/2016 23:00	11887	25/01/2016 23:00	2878	905949	A549	100	231	Glo	4	52	UN-USED	NA	NA	NA	31249
12512	21/01/2016 23:00	11887	25/01/2016 23:00	2878	905949	A549	100	231	Glo	4	53	UN-USED	NA	NA	NA	28286
12512	21/01/2016 23:00	11887	25/01/2016 23:00	2878	905949	A549	100	231	Glo	4	54	UN-USED	NA	NA	NA	34212
12512	21/01/2016 23:00	11887	25/01/2016 23:00	2878	905949	A549	100	231	Glo	4	55	UN-USED	NA	NA	NA	40425
12512	21/01/2016 23:00	11887	25/01/2016 23:00	2878	905949	A549	100	231	Glo	4	56	UN-USED	NA	NA	NA	35455
12512	21/01/2016 23:00	11887	25/01/2016 23:00	2878	905949	A549	100	231	Glo	4	57	UN-USED	NA	NA	NA	29433
12512	21/01/2016 23:00	11887	25/01/2016 23:00	2878	905949	A549	100	231	Glo	4	58	UN-USED	NA	NA	NA	35932
12512	21/01/2016 23:00	11887	25/01/2016 23:00	2878	905949	A549	100	231	Glo	4	59	UN-USED	NA	NA	NA	29337
12512	21/01/2016 23:00	11887	25/01/2016 23:00	2878	905949	A549	100	231	Glo	4	60	UN-USED	NA	NA	NA	31822
12512	21/01/2016 23:00	11887	25/01/2016 23:00	2878	905949	A549	100	231	Glo	4	61	UN-USED	NA	NA	NA	37749
12512	21/01/2016 23:00	11887	25/01/2016 23:00	2878	905949	A549	100	231	Glo	4	62	UN-USED	NA	NA	NA	31249
12512	21/01/2016 23:00	11887	25/01/2016 23:00	2878	905949	A549	100	231	Glo	4	63	UN-USED	NA	NA	NA	36028
12512	21/01/2016 23:00	11887	25/01/2016 23:00	2878	905949	A549	100	231	Glo	4	64	UN-USED	NA	NA	NA	28573
12512	21/01/2016 23:00	11887	25/01/2016 23:00	2878	905949	A549	100	231	Glo	4	65	UN-USED	NA	NA	NA	31918
12512	21/01/2016 23:00	11887	25/01/2016 23:00	2878	905949	A549	100	231	Glo	4	66	UN-USED	NA	NA	NA	31249
12512	21/01/2016 23:00	11887	25/01/2016 23:00	2878	905949	A549	100	231	Glo	4	67	UN-USED	NA	NA	NA	40712
12512	21/01/2016 23:00	11887	25/01/2016 23:00	2878	905949	A549	100	231	Glo	4	68	UN-USED	NA	NA	NA	39374
12512	21/01/2016 23:00	11887	25/01/2016 23:00	2878	905949	A549	100	231	Glo	4	69	UN-USED	NA	NA	NA	24463
12512	21/01/2016 23:00	11887	25/01/2016 23:00	2878	905949	A549	100	231	Glo	4	70	UN-USED	NA	NA	NA	39756
12512	21/01/2016 23:00	11887	25/01/2016 23:00	2878	905949	A549	100	231	Glo	4	71	UN-USED	NA	NA	NA	36984
12512	21/01/2016 23:00	11887	25/01/2016 23:00	2878	905949	A549	100	231	Glo	4	72	UN-USED	NA	NA	NA	32205
12512	21/01/2016 23:00	11887	25/01/2016 23:00	2878	905949	A549	100	231	Glo	4	73	UN-USED	NA	NA	NA	37079
12512	21/01/2016 23:00	11887	25/01/2016 23:00	2878	905949	A549	100	231	Glo	4	74	UN-USED	NA	NA	NA	36984
12512	21/01/2016 23:00	11887	25/01/2016 23:00	2878	905949	A549	100	231	Glo	4	75	UN-USED	NA	NA	NA	33352
12512	21/01/2016 23:00	11887	25/01/2016 23:00	2878	905949	A549	100	231	Glo	4	76	UN-USED	NA	NA	NA	34594
12512	21/01/2016 23:00	11887	25/01/2016 23:00	2878	905949	A549	100	231	Glo	4	77	UN-USED	NA	NA	NA	32492
12512	21/01/2016 23:00	11887	25/01/2016 23:00	2878	905949	A549	100	231	Glo	4	78	UN-USED	NA	NA	NA	31727
12512	21/01/2016 23:00	11887	25/01/2016 23:00	2878	905949	A549	100	231	Glo	4	79	UN-USED	NA	NA	NA	27904
12512	21/01/2016 23:00	11887	25/01/2016 23:00	2878	905949	A549	100	231	Glo	4	80	UN-USED	NA	NA	NA	31822
12512	21/01/2016 23:00	11887	25/01/2016 23:00	2878	905949	A549	100	231	Glo	4	81	UN-USED	NA	NA	NA	43006
12512	21/01/2016 23:00	11887	25/01/2016 23:00	2878	905949	A549	100	231	Glo	4	82	UN-USED	NA	NA	NA	32778
12512	21/01/2016 23:00	11887	25/01/2016 23:00	2878	905949	A549	100	231	Glo	4	83	UN-USED	NA	NA	NA	30006
12512	21/01/2016 23:00	11887	25/01/2016 23:00	2878	905949	A549	100	231	Glo	4	84	UN-USED	NA	NA	NA	34212
12512	21/01/2016 23:00	11887	25/01/2016 23:00	2878	905949	A549	100	231	Glo	4	85	UN-USED	NA	NA	NA	29337
12512	21/01/2016 23:00	11887	25/01/2016 23:00	2878	905949	A549	100	231	Glo	4	86	UN-USED	NA	NA	NA	33830
12512	21/01/2016 23:00	11887	25/01/2016 23:00	2878	905949	A549	100	231	Glo	4	87	UN-USED	NA	NA	NA	27330
12512	21/01/2016 23:00	11887	25/01/2016 23:00	2878	905949	A549	100	231	Glo	4	88	UN-USED	NA	NA	NA	28668
12512	21/01/2016 23:00	11887	25/01/2016 23:00	2878	905949	A549	100	231	Glo	4	89	UN-USED	NA	NA	NA	34116
12512	21/01/2016 23:00	11887	25/01/2016 23:00	2878	905949	A549	100	231	Glo	4	90	UN-USED	NA	NA	NA	22552
12512	21/01/2016 23:00	11887	25/01/2016 23:00	2878	905949	A549	100	231	Glo	4	91	UN-USED	NA	NA	NA	34977
12512	21/01/2016 23:00	11887	25/01/2016 23:00	2878	905949	A549	100	231	Glo	4	92	UN-USED	NA	NA	NA	43006
12512	21/01/2016 23:00	11887	25/01/2016 23:00	2878	905949	A549	100	231	Glo	4	93	UN-USED	NA	NA	NA	28191
12512	21/01/2016 23:00	11887	25/01/2016 23:00	2878	905949	A549	100	231	Glo	4	94	UN-USED	NA	NA	NA	23794
12512	21/01/2016 23:00	11887	25/01/2016 23:00	2878	905949	A549	100	231	Glo	4	95	UN-USED	NA	NA	NA	2866
12512	21/01/2016 23:00	11887	25/01/2016 23:00	2878	905949	A549	100	231	Glo	4	96	UN-USED	NA	NA	NA	96
12512	21/01/2016 23:00	11887	25/01/2016 23:00	2878	905949	A549	100	231	Glo	4	97	B	NA	NA	NA	0
12512	21/01/2016 23:00	11887	25/01/2016 23:00	2878	905949	A549	100	231	Glo	4	98	UN-USED	NA	NA	NA	27044
12512	21/01/2016 23:00	11887	25/01/2016 23:00	2878	905949	A549	100	231	Glo	4	99	NC-1	4000	DMSO	NA	34308
12512	21/01/2016 23:00	11887	25/01/2016 23:00	2878	905949	A549	100	231	Glo	4	100	NC-1	4000	DMSO	NA	42815
12512	21/01/2016 23:00	11887	25/01/2016 23:00	2878	905949	A549	100	231	Glo	4	101	PC2-D1-S	1034	Staurosporine	2	3726
12512	21/01/2016 23:00	11887	25/01/2016 23:00	2878	905949	A549	100	231	Glo	4	102	PC1-D1-S	1862	MG-132	4	5351
12512	21/01/2016 23:00	11887	25/01/2016 23:00	2878	905949	A549	100	231	Glo	4	103	NC-1	4000	DMSO	NA	32778
12512	21/01/2016 23:00	11887	25/01/2016 23:00	2878	905949	A549	100	231	Glo	4	104	NC-1	4000	DMSO	NA	30867
12512	21/01/2016 23:00	11887	25/01/2016 23:00	2878	905949	A549	100	231	Glo	4	105	NC-1	4000	DMSO	NA	32205
12512	21/01/2016 23:00	11887	25/01/2016 23:00	2878	905949	A549	100	231	Glo	4	113	NC-1	4000	DMSO	NA	27521
12512	21/01/2016 23:00	11887	25/01/2016 23:00	2878	905949	A549	100	231	Glo	4	121	NC-1	4000	DMSO	NA	29433
12512	21/01/2016 23:00	11887	25/01/2016 23:00	2878	905949	A549	100	231	Glo	4	136	NC-1	4000	DMSO	NA	30484
12512	21/01/2016 23:00	11887	25/01/2016 23:00	2878	905949	A549	100	231	Glo	4	137	PC1-D1-S	1862	MG-132	4	4586
12512	21/01/2016 23:00	11887	25/01/2016 23:00	2878	905949	A549	100	231	Glo	4	138	PC2-D1-S	1034	Staurosporine	2	2771
12512	21/01/2016 23:00	11887	25/01/2016 23:00	2878	905949	A549	100	231	Glo	4	139	NC-1	4000	DMSO	NA	22456
12512	21/01/2016 23:00	11887	25/01/2016 23:00	2878	905949	A549	100	231	Glo	4	140	NC-1	4000	DMSO	NA	37175
12512	21/01/2016 23:00	11887	25/01/2016 23:00	2878	905949	A549	100	231	Glo	4	141	NC-1	4000	DMSO	NA	26375
12512	21/01/2016 23:00	11887	25/01/2016 23:00	2878	905949	A549	100	231	Glo	4	142	NC-1	4000	DMSO	NA	30162
12512	21/01/2016 23:00	11887	25/01/2016 23:00	2878	905949	A549	100	231	Glo	4	143	UN-USED	NA	NA	NA	23890
12512	21/01/2016 23:00	11887	25/01/2016 23:00	2878	905949	A549	100	231	Glo	4	144	UN-USED	NA	NA	NA	478
12512	21/01/2016 23:00	11887	25/01/2016 23:00	2878	905949	A549	100	231	Glo	4	145	B	NA	NA	NA	191
12512	21/01/2016 23:00	11887	25/01/2016 23:00	2878	905949	A549	100	231	Glo	4	146	UN-USED	NA	NA	NA	29051
12512	21/01/2016 23:00	11887	25/01/2016 23:00	2878	905949	A549	100	231	Glo	4	147	L1-D1-S	1003	Camptothecin	0.1	8886
12512	21/01/2016 23:00	11887	25/01/2016 23:00	2878	905949	A549	100	231	Glo	4	148	L1-D2-S	1003	Camptothecin	0.0316256	12135
12512	21/01/2016 23:00	11887	25/01/2016 23:00	2878	905949	A549	100	231	Glo	4	149	L1-D3-S	1003	Camptothecin	0.0100018	20927
12512	21/01/2016 23:00	11887	25/01/2016 23:00	2878	905949	A549	100	231	Glo	4	150	L1-D4-S	1003	Camptothecin	0.00316311	29963
12512	21/01/2016 23:00	11887	25/01/2016 23:00	2878	905949	A549	100	231	Glo	4	151	L1-D5-S	1003	Camptothecin	0.00100035	29911
12512	21/01/2016 23:00	11887	25/01/2016 23:00	2878	905949	A549	100	231	Glo	4	152	L1-D6-S	1003	Camptothecin	0.000316367	32750
12512	21/01/2016 23:00	11887	25/01/2016 23:00	2878	905949	A549	100	231	Glo	4	153	L1-D7-S	1003	Camptothecin	0.000100053	31058
12512	21/01/2016 23:00	11887	25/01/2016 23:00	2878	905949	A549	100	231	Glo	4	161	NC-1	4000	DMSO	NA	28477
12512	21/01/2016 23:00	11887	25/01/2016 23:00	2878	905949	A549	100	231	Glo	4	169	PC1-D1-S	1862	MG-132	4	4873
12512	21/01/2016 23:00	11887	25/01/2016 23:00	2878	905949	A549	100	231	Glo	4	170	NC-1	4000	DMSO	NA	23699
12512	21/01/2016 23:00	11887	25/01/2016 23:00	2878	905949	A549	100	231	Glo	4	171	NC-1	4000	DMSO	NA	26566
12512	21/01/2016 23:00	11887	25/01/2016 23:00	2878	905949	A549	100	231	Glo	4	172	NC-1	4000	DMSO	NA	23316
12512	21/01/2016 23:00	11887	25/01/2016 23:00	2878	905949	A549	100	231	Glo	4	173	PC2-D1-S	1034	Staurosporine	2	2771
12512	21/01/2016 23:00	11887	25/01/2016 23:00	2878	905949	A549	100	231	Glo	4	174	PC1-D1-S	1862	MG-132	4	5255
12512	21/01/2016 23:00	11887	25/01/2016 23:00	2878	905949	A549	100	231	Glo	4	175	NC-1	4000	DMSO	NA	29051
12512	21/01/2016 23:00	11887	25/01/2016 23:00	2878	905949	A549	100	231	Glo	4	176	NC-1	4000	DMSO	NA	25706
12512	21/01/2016 23:00	11887	25/01/2016 23:00	2878	905949	A549	100	231	Glo	4	191	UN-USED	NA	NA	NA	31153
12512	21/01/2016 23:00	11887	25/01/2016 23:00	2878	905949	A549	100	231	Glo	4	192	UN-USED	NA	NA	NA	2198
12512	21/01/2016 23:00	11887	25/01/2016 23:00	2878	905949	A549	100	231	Glo	4	193	B	NA	NA	NA	96
12512	21/01/2016 23:00	11887	25/01/2016 23:00	2878	905949	A549	100	231	Glo	4	194	UN-USED	NA	NA	NA	25514
12512	21/01/2016 23:00	11887	25/01/2016 23:00	2878	905949	A549	100	231	Glo	4	195	L2-D1-S	1004	Vinblastine	0.1	10320
12512	21/01/2016 23:00	11887	25/01/2016 23:00	2878	905949	A549	100	231	Glo	4	196	L2-D2-S	1004	Vinblastine	0.0316256	11753
12512	21/01/2016 23:00	11887	25/01/2016 23:00	2878	905949	A549	100	231	Glo	4	197	L2-D3-S	1004	Vinblastine	0.0100018	7931
12512	21/01/2016 23:00	11887	25/01/2016 23:00	2878	905949	A549	100	231	Glo	4	198	L2-D4-S	1004	Vinblastine	0.00316311	24654
12512	21/01/2016 23:00	11887	25/01/2016 23:00	2878	905949	A549	100	231	Glo	4	199	L2-D5-S	1004	Vinblastine	0.00100035	28955
12512	21/01/2016 23:00	11887	25/01/2016 23:00	2878	905949	A549	100	231	Glo	4	200	L2-D6-S	1004	Vinblastine	0.000316367	28955
12512	21/01/2016 23:00	11887	25/01/2016 23:00	2878	905949	A549	100	231	Glo	4	201	L2-D7-S	1004	Vinblastine	0.000100053	28764
12512	21/01/2016 23:00	11887	25/01/2016 23:00	2878	905949	A549	100	231	Glo	4	216	NC-1	4000	DMSO	NA	26757
12512	21/01/2016 23:00	11887	25/01/2016 23:00	2878	905949	A549	100	231	Glo	4	217	PC1-D2-S	1862	MG-132	1	10702
12512	21/01/2016 23:00	11887	25/01/2016 23:00	2878	905949	A549	100	231	Glo	4	239	UN-USED	NA	NA	NA	25419
12512	21/01/2016 23:00	11887	25/01/2016 23:00	2878	905949	A549	100	231	Glo	4	240	UN-USED	NA	NA	NA	9268
12512	21/01/2016 23:00	11887	25/01/2016 23:00	2878	905949	A549	100	231	Glo	4	241	B	NA	NA	NA	382
12512	21/01/2016 23:00	11887	25/01/2016 23:00	2878	905949	A549	100	231	Glo	4	242	UN-USED	NA	NA	NA	27713
12512	21/01/2016 23:00	11887	25/01/2016 23:00	2878	905949	A549	100	231	Glo	4	243	L3-D1-S	1005	Cisplatin	6	24941
12512	21/01/2016 23:00	11887	25/01/2016 23:00	2878	905949	A549	100	231	Glo	4	244	L3-D2-S	1005	Cisplatin	1.89753	27617
12512	21/01/2016 23:00	11887	25/01/2016 23:00	2878	905949	A549	100	231	Glo	4	245	L3-D3-S	1005	Cisplatin	0.600105	28573
12512	21/01/2016 23:00	11887	25/01/2016 23:00	2878	905949	A549	100	231	Glo	4	246	L3-D4-S	1005	Cisplatin	0.189787	32205
12512	21/01/2016 23:00	11887	25/01/2016 23:00	2878	905949	A549	100	231	Glo	4	247	L3-D5-S	1005	Cisplatin	0.0600211	30198
12512	21/01/2016 23:00	11887	25/01/2016 23:00	2878	905949	A549	100	231	Glo	4	248	L3-D6-S	1005	Cisplatin	0.018982	24559
12512	21/01/2016 23:00	11887	25/01/2016 23:00	2878	905949	A549	100	231	Glo	4	249	L3-D7-S	1005	Cisplatin	0.00600316	31631
12512	21/01/2016 23:00	11887	25/01/2016 23:00	2878	905949	A549	100	231	Glo	4	250	L28-D1-S	1091	BMS-536924	10	4491
12512	21/01/2016 23:00	11887	25/01/2016 23:00	2878	905949	A549	100	231	Glo	4	251	L28-D2-S	1091	BMS-536924	3.16256	13473
12512	21/01/2016 23:00	11887	25/01/2016 23:00	2878	905949	A549	100	231	Glo	4	252	L28-D3-S	1091	BMS-536924	1.00018	22074
12512	21/01/2016 23:00	11887	25/01/2016 23:00	2878	905949	A549	100	231	Glo	4	253	L28-D4-S	1091	BMS-536924	0.316311	26279
12512	21/01/2016 23:00	11887	25/01/2016 23:00	2878	905949	A549	100	231	Glo	4	254	L28-D5-S	1091	BMS-536924	0.100035	27999
12512	21/01/2016 23:00	11887	25/01/2016 23:00	2878	905949	A549	100	231	Glo	4	255	L28-D6-S	1091	BMS-536924	0.0316367	27808
12512	21/01/2016 23:00	11887	25/01/2016 23:00	2878	905949	A549	100	231	Glo	4	256	L28-D7-S	1091	BMS-536924	0.0100053	26757
12512	21/01/2016 23:00	11887	25/01/2016 23:00	2878	905949	A549	100	231	Glo	4	264	NC-1	4000	DMSO	NA	23699
12512	21/01/2016 23:00	11887	25/01/2016 23:00	2878	905949	A549	100	231	Glo	4	265	PC1-D3-S	1862	MG-132	0.25	16435
12512	21/01/2016 23:00	11887	25/01/2016 23:00	2878	905949	A549	100	231	Glo	4	287	UN-USED	NA	NA	NA	26852
12512	21/01/2016 23:00	11887	25/01/2016 23:00	2878	905949	A549	100	231	Glo	4	288	UN-USED	NA	NA	NA	8791
12512	21/01/2016 23:00	11887	25/01/2016 23:00	2878	905949	A549	100	231	Glo	4	289	B	NA	NA	NA	96
12512	21/01/2016 23:00	11887	25/01/2016 23:00	2878	905949	A549	100	231	Glo	4	290	UN-USED	NA	NA	NA	31058
12512	21/01/2016 23:00	11887	25/01/2016 23:00	2878	905949	A549	100	231	Glo	4	291	NC-1	4000	DMSO	NA	31536
12512	21/01/2016 23:00	11887	25/01/2016 23:00	2878	905949	A549	100	231	Glo	4	292	L4-D1-S	1006	Cytarabine	2	8217
12512	21/01/2016 23:00	11887	25/01/2016 23:00	2878	905949	A549	100	231	Glo	4	293	L4-D2-S	1006	Cytarabine	0.632511	11466
12512	21/01/2016 23:00	11887	25/01/2016 23:00	2878	905949	A549	100	231	Glo	4	294	L4-D3-S	1006	Cytarabine	0.200035	18347
12512	21/01/2016 23:00	11887	25/01/2016 23:00	2878	905949	A549	100	231	Glo	4	295	L4-D4-S	1006	Cytarabine	0.0632622	23985
12512	21/01/2016 23:00	11887	25/01/2016 23:00	2878	905949	A549	100	231	Glo	4	296	L4-D5-S	1006	Cytarabine	0.020007	17104
12512	21/01/2016 23:00	11887	25/01/2016 23:00	2878	905949	A549	100	231	Glo	4	297	L4-D6-S	1006	Cytarabine	0.00632733	30198
12512	21/01/2016 23:00	11887	25/01/2016 23:00	2878	905949	A549	100	231	Glo	4	298	L4-D7-S	1006	Cytarabine	0.00200105	25132
12512	21/01/2016 23:00	11887	25/01/2016 23:00	2878	905949	A549	100	231	Glo	4	306	NC-1	4000	DMSO	NA	25037
12512	21/01/2016 23:00	11887	25/01/2016 23:00	2878	905949	A549	100	231	Glo	4	307	PC1-D1-S	1862	MG-132	4	3153
12512	21/01/2016 23:00	11887	25/01/2016 23:00	2878	905949	A549	100	231	Glo	4	308	PC2-D1-S	1034	Staurosporine	2	1815
12512	21/01/2016 23:00	11887	25/01/2016 23:00	2878	905949	A549	100	231	Glo	4	309	NC-1	4000	DMSO	NA	25419
12512	21/01/2016 23:00	11887	25/01/2016 23:00	2878	905949	A549	100	231	Glo	4	310	NC-1	4000	DMSO	NA	19111
12512	21/01/2016 23:00	11887	25/01/2016 23:00	2878	905949	A549	100	231	Glo	4	311	NC-1	4000	DMSO	NA	22838
12512	21/01/2016 23:00	11887	25/01/2016 23:00	2878	905949	A549	100	231	Glo	4	312	NC-0	NA	NA	NA	32683
12512	21/01/2016 23:00	11887	25/01/2016 23:00	2878	905949	A549	100	231	Glo	4	313	PC1-D4-S	1862	MG-132	0.0625	27904
12512	21/01/2016 23:00	11887	25/01/2016 23:00	2878	905949	A549	100	231	Glo	4	328	NC-1	4000	DMSO	NA	29146
12512	21/01/2016 23:00	11887	25/01/2016 23:00	2878	905949	A549	100	231	Glo	4	329	PC1-D5-S	1862	MG-132	0.015625	21787
12512	21/01/2016 23:00	11887	25/01/2016 23:00	2878	905949	A549	100	231	Glo	4	330	PC1-D4-S	1862	MG-132	0.0625	28286
12512	21/01/2016 23:00	11887	25/01/2016 23:00	2878	905949	A549	100	231	Glo	4	331	PC1-D3-S	1862	MG-132	0.25	16340
12512	21/01/2016 23:00	11887	25/01/2016 23:00	2878	905949	A549	100	231	Glo	4	332	PC1-D2-S	1862	MG-132	1	6967
12512	21/01/2016 23:00	11887	25/01/2016 23:00	2878	905949	A549	100	231	Glo	4	333	PC1-D1-S	1862	MG-132	4	4013
12512	21/01/2016 23:00	11887	25/01/2016 23:00	2878	905949	A549	100	231	Glo	4	334	NC-1	4000	DMSO	NA	25228
12512	21/01/2016 23:00	11887	25/01/2016 23:00	2878	905949	A549	100	231	Glo	4	335	UN-USED	NA	NA	NA	27044
12512	21/01/2016 23:00	11887	25/01/2016 23:00	2878	905949	A549	100	231	Glo	4	336	UN-USED	NA	NA	NA	8122
12512	21/01/2016 23:00	11887	25/01/2016 23:00	2878	905949	A549	100	231	Glo	4	337	B	NA	NA	NA	382
12512	21/01/2016 23:00	11887	25/01/2016 23:00	2878	905949	A549	100	231	Glo	4	338	UN-USED	NA	NA	NA	31249
12512	21/01/2016 23:00	11887	25/01/2016 23:00	2878	905949	A549	100	231	Glo	4	339	NC-1	4000	DMSO	NA	30102
12512	21/01/2016 23:00	11887	25/01/2016 23:00	2878	905949	A549	100	231	Glo	4	340	L5-D1-S	1007	Docetaxel	0.0125	7548
12512	21/01/2016 23:00	11887	25/01/2016 23:00	2878	905949	A549	100	231	Glo	4	341	L5-D2-S	1007	Docetaxel	0.00395319	8026
12512	21/01/2016 23:00	11887	25/01/2016 23:00	2878	905949	A549	100	231	Glo	4	342	L5-D3-S	1007	Docetaxel	0.00125022	13951
12512	21/01/2016 23:00	11887	25/01/2016 23:00	2878	905949	A549	100	231	Glo	4	343	L5-D4-S	1007	Docetaxel	0.000395389	21118
12512	21/01/2016 23:00	11887	25/01/2016 23:00	2878	905949	A549	100	231	Glo	4	344	L5-D5-S	1007	Docetaxel	0.000125044	25801
12512	21/01/2016 23:00	11887	25/01/2016 23:00	2878	905949	A549	100	231	Glo	4	345	L5-D6-S	1007	Docetaxel	3.95e-05	31249
12512	21/01/2016 23:00	11887	25/01/2016 23:00	2878	905949	A549	100	231	Glo	4	346	L5-D7-S	1007	Docetaxel	1.25e-05	32300
12512	21/01/2016 23:00	11887	25/01/2016 23:00	2878	905949	A549	100	231	Glo	4	361	PC1-D5-S	1862	MG-132	0.015625	23125
12512	21/01/2016 23:00	11887	25/01/2016 23:00	2878	905949	A549	100	231	Glo	4	369	NC-1	4000	DMSO	NA	28573
12512	21/01/2016 23:00	11887	25/01/2016 23:00	2878	905949	A549	100	231	Glo	4	370	NC-1	4000	DMSO	NA	25706
12512	21/01/2016 23:00	11887	25/01/2016 23:00	2878	905949	A549	100	231	Glo	4	371	NC-1	4000	DMSO	NA	23030
12512	21/01/2016 23:00	11887	25/01/2016 23:00	2878	905949	A549	100	231	Glo	4	372	PC1-D1-S	1862	MG-132	4	4204
12512	21/01/2016 23:00	11887	25/01/2016 23:00	2878	905949	A549	100	231	Glo	4	373	PC2-D1-S	1034	Staurosporine	2	2293
12512	21/01/2016 23:00	11887	25/01/2016 23:00	2878	905949	A549	100	231	Glo	4	374	NC-1	4000	DMSO	NA	18538
12512	21/01/2016 23:00	11887	25/01/2016 23:00	2878	905949	A549	100	231	Glo	4	375	NC-1	4000	DMSO	NA	23890
12512	21/01/2016 23:00	11887	25/01/2016 23:00	2878	905949	A549	100	231	Glo	4	383	UN-USED	NA	NA	NA	22552
12512	21/01/2016 23:00	11887	25/01/2016 23:00	2878	905949	A549	100	231	Glo	4	384	UN-USED	NA	NA	NA	7262
12512	21/01/2016 23:00	11887	25/01/2016 23:00	2878	905949	A549	100	231	Glo	4	385	B	NA	NA	NA	96
12512	21/01/2016 23:00	11887	25/01/2016 23:00	2878	905949	A549	100	231	Glo	4	386	UN-USED	NA	NA	NA	31727
12512	21/01/2016 23:00	11887	25/01/2016 23:00	2878	905949	A549	100	231	Glo	4	387	NC-1	4000	DMSO	NA	37844
12512	21/01/2016 23:00	11887	25/01/2016 23:00	2878	905949	A549	100	231	Glo	4	388	L6-D1-S	1010	Gefitinib	2	23507
12512	21/01/2016 23:00	11887	25/01/2016 23:00	2878	905949	A549	100	231	Glo	4	389	L6-D2-S	1010	Gefitinib	0.632511	28573
12512	21/01/2016 23:00	11887	25/01/2016 23:00	2878	905949	A549	100	231	Glo	4	390	L6-D3-S	1010	Gefitinib	0.200035	26566
12512	21/01/2016 23:00	11887	25/01/2016 23:00	2878	905949	A549	100	231	Glo	4	391	L6-D4-S	1010	Gefitinib	0.0632622	31631
12512	21/01/2016 23:00	11887	25/01/2016 23:00	2878	905949	A549	100	231	Glo	4	392	L6-D5-S	1010	Gefitinib	0.020007	22074
12512	21/01/2016 23:00	11887	25/01/2016 23:00	2878	905949	A549	100	231	Glo	4	393	L6-D6-S	1010	Gefitinib	0.00632733	30198
12512	21/01/2016 23:00	11887	25/01/2016 23:00	2878	905949	A549	100	231	Glo	4	394	L6-D7-S	1010	Gefitinib	0.00200105	25037
12512	21/01/2016 23:00	11887	25/01/2016 23:00	2878	905949	A549	100	231	Glo	4	430	NC-1	4000	DMSO	NA	26088
12512	21/01/2016 23:00	11887	25/01/2016 23:00	2878	905949	A549	100	231	Glo	4	431	UN-USED	NA	NA	NA	26279
12512	21/01/2016 23:00	11887	25/01/2016 23:00	2878	905949	A549	100	231	Glo	4	432	UN-USED	NA	NA	NA	8886
12512	21/01/2016 23:00	11887	25/01/2016 23:00	2878	905949	A549	100	231	Glo	4	433	B	NA	NA	NA	191
12512	21/01/2016 23:00	11887	25/01/2016 23:00	2878	905949	A549	100	231	Glo	4	434	UN-USED	NA	NA	NA	26948
12512	21/01/2016 23:00	11887	25/01/2016 23:00	2878	905949	A549	100	231	Glo	4	435	NC-1	4000	DMSO	NA	28095
12512	21/01/2016 23:00	11887	25/01/2016 23:00	2878	905949	A549	100	231	Glo	4	478	NC-1	4000	DMSO	NA	23890
12512	21/01/2016 23:00	11887	25/01/2016 23:00	2878	905949	A549	100	231	Glo	4	479	UN-USED	NA	NA	NA	38800
12512	21/01/2016 23:00	11887	25/01/2016 23:00	2878	905949	A549	100	231	Glo	4	480	UN-USED	NA	NA	NA	15098
12512	21/01/2016 23:00	11887	25/01/2016 23:00	2878	905949	A549	100	231	Glo	4	481	B	NA	NA	NA	287
12512	21/01/2016 23:00	11887	25/01/2016 23:00	2878	905949	A549	100	231	Glo	4	482	UN-USED	NA	NA	NA	35359
12512	21/01/2016 23:00	11887	25/01/2016 23:00	2878	905949	A549	100	231	Glo	4	483	L8-D1-S	1012	Vorinostat	10	5446
12512	21/01/2016 23:00	11887	25/01/2016 23:00	2878	905949	A549	100	231	Glo	4	484	L8-D2-S	1012	Vorinostat	3.16256	11562
12512	21/01/2016 23:00	11887	25/01/2016 23:00	2878	905949	A549	100	231	Glo	4	485	L8-D3-S	1012	Vorinostat	1.00018	21500
12512	21/01/2016 23:00	11887	25/01/2016 23:00	2878	905949	A549	100	231	Glo	4	486	L8-D4-S	1012	Vorinostat	0.316311	29911
12512	21/01/2016 23:00	11887	25/01/2016 23:00	2878	905949	A549	100	231	Glo	4	487	L8-D5-S	1012	Vorinostat	0.100035	30771
12512	21/01/2016 23:00	11887	25/01/2016 23:00	2878	905949	A549	100	231	Glo	4	488	L8-D6-S	1012	Vorinostat	0.0316367	19111
12512	21/01/2016 23:00	11887	25/01/2016 23:00	2878	905949	A549	100	231	Glo	4	489	L8-D7-S	1012	Vorinostat	0.0100053	27139
12512	21/01/2016 23:00	11887	25/01/2016 23:00	2878	905949	A549	100	231	Glo	4	490	NC-1	4000	DMSO	NA	32587
12512	21/01/2016 23:00	11887	25/01/2016 23:00	2878	905949	A549	100	231	Glo	4	491	NC-1	4000	DMSO	NA	27521
12512	21/01/2016 23:00	11887	25/01/2016 23:00	2878	905949	A549	100	231	Glo	4	492	PC2-D1-S	1034	Staurosporine	2	4109
12512	21/01/2016 23:00	11887	25/01/2016 23:00	2878	905949	A549	100	231	Glo	4	493	PC1-D1-S	1862	MG-132	4	4491
12512	21/01/2016 23:00	11887	25/01/2016 23:00	2878	905949	A549	100	231	Glo	4	494	NC-1	4000	DMSO	NA	25992
12512	21/01/2016 23:00	11887	25/01/2016 23:00	2878	905949	A549	100	231	Glo	4	495	NC-1	4000	DMSO	NA	25992
12512	21/01/2016 23:00	11887	25/01/2016 23:00	2878	905949	A549	100	231	Glo	4	496	NC-1	4000	DMSO	NA	32969
12512	21/01/2016 23:00	11887	25/01/2016 23:00	2878	905949	A549	100	231	Glo	4	497	NC-1	4000	DMSO	NA	29337
12512	21/01/2016 23:00	11887	25/01/2016 23:00	2878	905949	A549	100	231	Glo	4	519	NC-1	4000	DMSO	NA	24559
12512	21/01/2016 23:00	11887	25/01/2016 23:00	2878	905949	A549	100	231	Glo	4	527	UN-USED	NA	NA	NA	29051
12512	21/01/2016 23:00	11887	25/01/2016 23:00	2878	905949	A549	100	231	Glo	4	528	UN-USED	NA	NA	NA	11753
12512	21/01/2016 23:00	11887	25/01/2016 23:00	2878	905949	A549	100	231	Glo	4	529	B	NA	NA	NA	96
12512	21/01/2016 23:00	11887	25/01/2016 23:00	2878	905949	A549	100	231	Glo	4	530	UN-USED	NA	NA	NA	35837
12512	21/01/2016 23:00	11887	25/01/2016 23:00	2878	905949	A549	100	231	Glo	4	531	L9-D1-S	1013	Nilotinib	2	24941
12512	21/01/2016 23:00	11887	25/01/2016 23:00	2878	905949	A549	100	231	Glo	4	532	L9-D2-S	1013	Nilotinib	0.632511	24272
12512	21/01/2016 23:00	11887	25/01/2016 23:00	2878	905949	A549	100	231	Glo	4	533	L9-D3-S	1013	Nilotinib	0.200035	29242
12512	21/01/2016 23:00	11887	25/01/2016 23:00	2878	905949	A549	100	231	Glo	4	534	L9-D4-S	1013	Nilotinib	0.0632622	33638
12512	21/01/2016 23:00	11887	25/01/2016 23:00	2878	905949	A549	100	231	Glo	4	535	L9-D5-S	1013	Nilotinib	0.020007	27999
12512	21/01/2016 23:00	11887	25/01/2016 23:00	2878	905949	A549	100	231	Glo	4	536	L9-D6-S	1013	Nilotinib	0.00632733	25323
12512	21/01/2016 23:00	11887	25/01/2016 23:00	2878	905949	A549	100	231	Glo	4	537	L9-D7-S	1013	Nilotinib	0.00200105	23890
12512	21/01/2016 23:00	11887	25/01/2016 23:00	2878	905949	A549	100	231	Glo	4	552	NC-1	4000	DMSO	NA	28860
12512	21/01/2016 23:00	11887	25/01/2016 23:00	2878	905949	A549	100	231	Glo	4	560	NC-1	4000	DMSO	NA	23316
12512	21/01/2016 23:00	11887	25/01/2016 23:00	2878	905949	A549	100	231	Glo	4	561	PC2-D5-S	1034	Staurosporine	0.0078125	8791
12512	21/01/2016 23:00	11887	25/01/2016 23:00	2878	905949	A549	100	231	Glo	4	562	PC2-D4-S	1034	Staurosporine	0.03125	6688
12512	21/01/2016 23:00	11887	25/01/2016 23:00	2878	905949	A549	100	231	Glo	4	563	PC2-D3-S	1034	Staurosporine	0.125	5064
12512	21/01/2016 23:00	11887	25/01/2016 23:00	2878	905949	A549	100	231	Glo	4	564	PC2-D2-S	1034	Staurosporine	0.5	3249
12512	21/01/2016 23:00	11887	25/01/2016 23:00	2878	905949	A549	100	231	Glo	4	565	PC2-D1-S	1034	Staurosporine	2	2484
12512	21/01/2016 23:00	11887	25/01/2016 23:00	2878	905949	A549	100	231	Glo	4	566	NC-1	4000	DMSO	NA	28382
12512	21/01/2016 23:00	11887	25/01/2016 23:00	2878	905949	A549	100	231	Glo	4	567	PC1-D1-S	1862	MG-132	4	5924
12512	21/01/2016 23:00	11887	25/01/2016 23:00	2878	905949	A549	100	231	Glo	4	575	UN-USED	NA	NA	NA	35168
12512	21/01/2016 23:00	11887	25/01/2016 23:00	2878	905949	A549	100	231	Glo	4	576	UN-USED	NA	NA	NA	8982
12512	21/01/2016 23:00	11887	25/01/2016 23:00	2878	905949	A549	100	231	Glo	4	577	B	NA	NA	NA	96
12512	21/01/2016 23:00	11887	25/01/2016 23:00	2878	905949	A549	100	231	Glo	4	578	UN-USED	NA	NA	NA	33925
12512	21/01/2016 23:00	11887	25/01/2016 23:00	2878	905949	A549	100	231	Glo	4	579	L10-D1-S	1022	AZD7762	10	1338
12512	21/01/2016 23:00	11887	25/01/2016 23:00	2878	905949	A549	100	231	Glo	4	580	L10-D2-S	1022	AZD7762	3.16256	7071
12512	21/01/2016 23:00	11887	25/01/2016 23:00	2878	905949	A549	100	231	Glo	4	581	L10-D3-S	1022	AZD7762	1.00018	17009
12512	21/01/2016 23:00	11887	25/01/2016 23:00	2878	905949	A549	100	231	Glo	4	582	L10-D4-S	1022	AZD7762	0.316311	19494
12512	21/01/2016 23:00	11887	25/01/2016 23:00	2878	905949	A549	100	231	Glo	4	583	L10-D5-S	1022	AZD7762	0.100035	28573
12512	21/01/2016 23:00	11887	25/01/2016 23:00	2878	905949	A549	100	231	Glo	4	584	L10-D6-S	1022	AZD7762	0.0316367	26852
12512	21/01/2016 23:00	11887	25/01/2016 23:00	2878	905949	A549	100	231	Glo	4	585	L10-D7-S	1022	AZD7762	0.0100053	32778
12512	21/01/2016 23:00	11887	25/01/2016 23:00	2878	905949	A549	100	231	Glo	4	600	NC-1	4000	DMSO	NA	25801
12512	21/01/2016 23:00	11887	25/01/2016 23:00	2878	905949	A549	100	231	Glo	4	615	NC-1	4000	DMSO	NA	30102
12512	21/01/2016 23:00	11887	25/01/2016 23:00	2878	905949	A549	100	231	Glo	4	623	UN-USED	NA	NA	NA	38704
12512	21/01/2016 23:00	11887	25/01/2016 23:00	2878	905949	A549	100	231	Glo	4	624	UN-USED	NA	NA	NA	14620
12512	21/01/2016 23:00	11887	25/01/2016 23:00	2878	905949	A549	100	231	Glo	4	625	B	NA	NA	NA	191
12512	21/01/2016 23:00	11887	25/01/2016 23:00	2878	905949	A549	100	231	Glo	4	626	UN-USED	NA	NA	NA	29815
12512	21/01/2016 23:00	11887	25/01/2016 23:00	2878	905949	A549	100	231	Glo	4	627	L11-D1-S	1032	Afatinib	10	7835
12512	21/01/2016 23:00	11887	25/01/2016 23:00	2878	905949	A549	100	231	Glo	4	628	L11-D2-S	1032	Afatinib	3.16256	13377
12512	21/01/2016 23:00	11887	25/01/2016 23:00	2878	905949	A549	100	231	Glo	4	629	L11-D3-S	1032	Afatinib	1.00018	22169
12512	21/01/2016 23:00	11887	25/01/2016 23:00	2878	905949	A549	100	231	Glo	4	630	L11-D4-S	1032	Afatinib	0.316311	23125
12512	21/01/2016 23:00	11887	25/01/2016 23:00	2878	905949	A549	100	231	Glo	4	631	L11-D5-S	1032	Afatinib	0.100035	18251
12512	21/01/2016 23:00	11887	25/01/2016 23:00	2878	905949	A549	100	231	Glo	4	632	L11-D6-S	1032	Afatinib	0.0316367	18156
12512	21/01/2016 23:00	11887	25/01/2016 23:00	2878	905949	A549	100	231	Glo	4	633	L11-D7-S	1032	Afatinib	0.0100053	25514
12512	21/01/2016 23:00	11887	25/01/2016 23:00	2878	905949	A549	100	231	Glo	4	634	L35-D1-S	1199	Tamoxifen	10	25132
12512	21/01/2016 23:00	11887	25/01/2016 23:00	2878	905949	A549	100	231	Glo	4	635	L35-D2-S	1199	Tamoxifen	3.16256	23890
12512	21/01/2016 23:00	11887	25/01/2016 23:00	2878	905949	A549	100	231	Glo	4	636	L35-D3-S	1199	Tamoxifen	1.00018	22265
12512	21/01/2016 23:00	11887	25/01/2016 23:00	2878	905949	A549	100	231	Glo	4	637	L35-D4-S	1199	Tamoxifen	0.316311	23412
12512	21/01/2016 23:00	11887	25/01/2016 23:00	2878	905949	A549	100	231	Glo	4	638	L35-D5-S	1199	Tamoxifen	0.100035	21023
12512	21/01/2016 23:00	11887	25/01/2016 23:00	2878	905949	A549	100	231	Glo	4	639	L35-D6-S	1199	Tamoxifen	0.0316367	21214
12512	21/01/2016 23:00	11887	25/01/2016 23:00	2878	905949	A549	100	231	Glo	4	640	L35-D7-S	1199	Tamoxifen	0.0100053	26948
12512	21/01/2016 23:00	11887	25/01/2016 23:00	2878	905949	A549	100	231	Glo	4	641	NC-1	4000	DMSO	NA	32205
12512	21/01/2016 23:00	11887	25/01/2016 23:00	2878	905949	A549	100	231	Glo	4	663	NC-1	4000	DMSO	NA	30962
12512	21/01/2016 23:00	11887	25/01/2016 23:00	2878	905949	A549	100	231	Glo	4	671	UN-USED	NA	NA	NA	43293
12512	21/01/2016 23:00	11887	25/01/2016 23:00	2878	905949	A549	100	231	Glo	4	672	UN-USED	NA	NA	NA	9173
12512	21/01/2016 23:00	11887	25/01/2016 23:00	2878	905949	A549	100	231	Glo	4	673	B	NA	NA	NA	382
12512	21/01/2016 23:00	11887	25/01/2016 23:00	2878	905949	A549	100	231	Glo	4	674	UN-USED	NA	NA	NA	40999
12512	21/01/2016 23:00	11887	25/01/2016 23:00	2878	905949	A549	100	231	Glo	4	675	NC-1	4000	DMSO	NA	35168
12512	21/01/2016 23:00	11887	25/01/2016 23:00	2878	905949	A549	100	231	Glo	4	676	PC2-D1-S	1034	Staurosporine	2	4682
12512	21/01/2016 23:00	11887	25/01/2016 23:00	2878	905949	A549	100	231	Glo	4	677	PC1-D1-S	1862	MG-132	4	6880
12512	21/01/2016 23:00	11887	25/01/2016 23:00	2878	905949	A549	100	231	Glo	4	678	NC-1	4000	DMSO	NA	30676
12512	21/01/2016 23:00	11887	25/01/2016 23:00	2878	905949	A549	100	231	Glo	4	679	NC-0	NA	NA	NA	32205
12512	21/01/2016 23:00	11887	25/01/2016 23:00	2878	905949	A549	100	231	Glo	4	680	NC-1	4000	DMSO	NA	25781
12512	21/01/2016 23:00	11887	25/01/2016 23:00	2878	905949	A549	100	231	Glo	4	681	NC-1	4000	DMSO	NA	31440
12512	21/01/2016 23:00	11887	25/01/2016 23:00	2878	905949	A549	100	231	Glo	4	689	NC-1	4000	DMSO	NA	29911
12512	21/01/2016 23:00	11887	25/01/2016 23:00	2878	905949	A549	100	231	Glo	4	711	NC-1	4000	DMSO	NA	27330
12512	21/01/2016 23:00	11887	25/01/2016 23:00	2878	905949	A549	100	231	Glo	4	719	UN-USED	NA	NA	NA	39660
12512	21/01/2016 23:00	11887	25/01/2016 23:00	2878	905949	A549	100	231	Glo	4	720	UN-USED	NA	NA	NA	13282
12512	21/01/2016 23:00	11887	25/01/2016 23:00	2878	905949	A549	100	231	Glo	4	721	B	NA	NA	NA	287
12512	21/01/2016 23:00	11887	25/01/2016 23:00	2878	905949	A549	100	231	Glo	4	722	UN-USED	NA	NA	NA	21596
12512	21/01/2016 23:00	11887	25/01/2016 23:00	2878	905949	A549	100	231	Glo	4	723	L12-D1-S	1036	PLX4720	10	24463
12512	21/01/2016 23:00	11887	25/01/2016 23:00	2878	905949	A549	100	231	Glo	4	724	L12-D2-S	1036	PLX4720	3.16256	21309
12512	21/01/2016 23:00	11887	25/01/2016 23:00	2878	905949	A549	100	231	Glo	4	725	L12-D3-S	1036	PLX4720	1.00018	32683
12512	21/01/2016 23:00	11887	25/01/2016 23:00	2878	905949	A549	100	231	Glo	4	726	L12-D4-S	1036	PLX4720	0.316311	31153
12512	21/01/2016 23:00	11887	25/01/2016 23:00	2878	905949	A549	100	231	Glo	4	727	L12-D5-S	1036	PLX4720	0.100035	32778
12512	21/01/2016 23:00	11887	25/01/2016 23:00	2878	905949	A549	100	231	Glo	4	728	L12-D6-S	1036	PLX4720	0.0316367	25610
12512	21/01/2016 23:00	11887	25/01/2016 23:00	2878	905949	A549	100	231	Glo	4	729	L12-D7-S	1036	PLX4720	0.0100053	26948
12512	21/01/2016 23:00	11887	25/01/2016 23:00	2878	905949	A549	100	231	Glo	4	730	NC-1	4000	DMSO	NA	29337
12512	21/01/2016 23:00	11887	25/01/2016 23:00	2878	905949	A549	100	231	Glo	4	738	NC-0	NA	NA	NA	29337
12512	21/01/2016 23:00	11887	25/01/2016 23:00	2878	905949	A549	100	231	Glo	4	739	NC-1	4000	DMSO	NA	30962
12512	21/01/2016 23:00	11887	25/01/2016 23:00	2878	905949	A549	100	231	Glo	4	740	NC-1	4000	DMSO	NA	28668
12512	21/01/2016 23:00	11887	25/01/2016 23:00	2878	905949	A549	100	231	Glo	4	741	PC2-D1-S	1034	Staurosporine	2	3822
12512	21/01/2016 23:00	11887	25/01/2016 23:00	2878	905949	A549	100	231	Glo	4	742	PC1-D1-S	1862	MG-132	4	6020
12512	21/01/2016 23:00	11887	25/01/2016 23:00	2878	905949	A549	100	231	Glo	4	743	NC-1	4000	DMSO	NA	29529
12512	21/01/2016 23:00	11887	25/01/2016 23:00	2878	905949	A549	100	231	Glo	4	744	NC-1	4000	DMSO	NA	29146
12512	21/01/2016 23:00	11887	25/01/2016 23:00	2878	905949	A549	100	231	Glo	4	759	NC-1	4000	DMSO	NA	30484
12512	21/01/2016 23:00	11887	25/01/2016 23:00	2878	905949	A549	100	231	Glo	4	767	UN-USED	NA	NA	NA	29911
12512	21/01/2016 23:00	11887	25/01/2016 23:00	2878	905949	A549	100	231	Glo	4	768	UN-USED	NA	NA	NA	10415
12512	21/01/2016 23:00	11887	25/01/2016 23:00	2878	905949	A549	100	231	Glo	4	769	B	NA	NA	NA	382
12512	21/01/2016 23:00	11887	25/01/2016 23:00	2878	905949	A549	100	231	Glo	4	770	UN-USED	NA	NA	NA	33065
12512	21/01/2016 23:00	11887	25/01/2016 23:00	2878	905949	A549	100	231	Glo	4	771	L13-D1-S	1046	681640	10	7548
12512	21/01/2016 23:00	11887	25/01/2016 23:00	2878	905949	A549	100	231	Glo	4	772	L13-D2-S	1046	681640	3.16256	22074
12512	21/01/2016 23:00	11887	25/01/2016 23:00	2878	905949	A549	100	231	Glo	4	773	L13-D3-S	1046	681640	1.00018	32014
12512	21/01/2016 23:00	11887	25/01/2016 23:00	2878	905949	A549	100	231	Glo	4	774	L13-D4-S	1046	681640	0.316311	32109
12512	21/01/2016 23:00	11887	25/01/2016 23:00	2878	905949	A549	100	231	Glo	4	775	L13-D5-S	1046	681640	0.100035	31345
12512	21/01/2016 23:00	11887	25/01/2016 23:00	2878	905949	A549	100	231	Glo	4	776	L13-D6-S	1046	681640	0.0316367	30006
12512	21/01/2016 23:00	11887	25/01/2016 23:00	2878	905949	A549	100	231	Glo	4	777	L13-D7-S	1046	681640	0.0100053	27235
12512	21/01/2016 23:00	11887	25/01/2016 23:00	2878	905949	A549	100	231	Glo	4	778	NC-1	4000	DMSO	NA	24941
12512	21/01/2016 23:00	11887	25/01/2016 23:00	2878	905949	A549	100	231	Glo	4	779	L38-D1-S	1239	YK 4-279	20	7357
12512	21/01/2016 23:00	11887	25/01/2016 23:00	2878	905949	A549	100	231	Glo	4	780	L38-D2-S	1239	YK 4-279	6.32511	14906
12512	21/01/2016 23:00	11887	25/01/2016 23:00	2878	905949	A549	100	231	Glo	4	781	L38-D3-S	1239	YK 4-279	2.00035	17391
12512	21/01/2016 23:00	11887	25/01/2016 23:00	2878	905949	A549	100	231	Glo	4	782	L38-D4-S	1239	YK 4-279	0.632622	24750
12512	21/01/2016 23:00	11887	25/01/2016 23:00	2878	905949	A549	100	231	Glo	4	783	L38-D5-S	1239	YK 4-279	0.20007	19971
12512	21/01/2016 23:00	11887	25/01/2016 23:00	2878	905949	A549	100	231	Glo	4	784	L38-D6-S	1239	YK 4-279	0.0632733	31918
12512	21/01/2016 23:00	11887	25/01/2016 23:00	2878	905949	A549	100	231	Glo	4	785	L38-D7-S	1239	YK 4-279	0.0200105	33925
12512	21/01/2016 23:00	11887	25/01/2016 23:00	2878	905949	A549	100	231	Glo	4	793	NC-1	4000	DMSO	NA	32396
12512	21/01/2016 23:00	11887	25/01/2016 23:00	2878	905949	A549	100	231	Glo	4	794	NC-1	4000	DMSO	NA	30580
12512	21/01/2016 23:00	11887	25/01/2016 23:00	2878	905949	A549	100	231	Glo	4	795	PC2-D1-S	1034	Staurosporine	2	7357
12512	21/01/2016 23:00	11887	25/01/2016 23:00	2878	905949	A549	100	231	Glo	4	796	PC1-D1-S	1862	MG-132	4	5446
12512	21/01/2016 23:00	11887	25/01/2016 23:00	2878	905949	A549	100	231	Glo	4	797	NC-1	4000	DMSO	NA	27999
12512	21/01/2016 23:00	11887	25/01/2016 23:00	2878	905949	A549	100	231	Glo	4	798	NC-1	4000	DMSO	NA	27521
12512	21/01/2016 23:00	11887	25/01/2016 23:00	2878	905949	A549	100	231	Glo	4	799	NC-0	NA	NA	NA	31631
12512	21/01/2016 23:00	11887	25/01/2016 23:00	2878	905949	A549	100	231	Glo	4	807	NC-1	4000	DMSO	NA	26852
12512	21/01/2016 23:00	11887	25/01/2016 23:00	2878	905949	A549	100	231	Glo	4	815	UN-USED	NA	NA	NA	33830
12512	21/01/2016 23:00	11887	25/01/2016 23:00	2878	905949	A549	100	231	Glo	4	816	UN-USED	NA	NA	NA	9937
12512	21/01/2016 23:00	11887	25/01/2016 23:00	2878	905949	A549	100	231	Glo	4	817	B	NA	NA	NA	96
12512	21/01/2016 23:00	11887	25/01/2016 23:00	2878	905949	A549	100	231	Glo	4	818	UN-USED	NA	NA	NA	37462
12512	21/01/2016 23:00	11887	25/01/2016 23:00	2878	905949	A549	100	231	Glo	4	819	L14-D1-S	1047	Nutlin-3a (-)	8	10702
12512	21/01/2016 23:00	11887	25/01/2016 23:00	2878	905949	A549	100	231	Glo	4	820	L14-D2-S	1047	Nutlin-3a (-)	2.53004	20831
12512	21/01/2016 23:00	11887	25/01/2016 23:00	2878	905949	A549	100	231	Glo	4	821	L14-D3-S	1047	Nutlin-3a (-)	0.800141	27426
12512	21/01/2016 23:00	11887	25/01/2016 23:00	2878	905949	A549	100	231	Glo	4	822	L14-D4-S	1047	Nutlin-3a (-)	0.253049	24272
12512	21/01/2016 23:00	11887	25/01/2016 23:00	2878	905949	A549	100	231	Glo	4	823	L14-D5-S	1047	Nutlin-3a (-)	0.0800281	34212
12512	21/01/2016 23:00	11887	25/01/2016 23:00	2878	905949	A549	100	231	Glo	4	824	L14-D6-S	1047	Nutlin-3a (-)	0.0253093	44727
12512	21/01/2016 23:00	11887	25/01/2016 23:00	2878	905949	A549	100	231	Glo	4	825	L14-D7-S	1047	Nutlin-3a (-)	0.00800422	29720
12512	21/01/2016 23:00	11887	25/01/2016 23:00	2878	905949	A549	100	231	Glo	4	826	NC-1	4000	DMSO	NA	30293
12512	21/01/2016 23:00	11887	25/01/2016 23:00	2878	905949	A549	100	231	Glo	4	827	L39-D1-S	1259	Talazoparib	10	14333
12512	21/01/2016 23:00	11887	25/01/2016 23:00	2878	905949	A549	100	231	Glo	4	828	L39-D2-S	1259	Talazoparib	3.16256	24941
12512	21/01/2016 23:00	11887	25/01/2016 23:00	2878	905949	A549	100	231	Glo	4	829	L39-D3-S	1259	Talazoparib	1.00018	28573
12512	21/01/2016 23:00	11887	25/01/2016 23:00	2878	905949	A549	100	231	Glo	4	830	L39-D4-S	1259	Talazoparib	0.316311	30484
12512	21/01/2016 23:00	11887	25/01/2016 23:00	2878	905949	A549	100	231	Glo	4	831	L39-D5-S	1259	Talazoparib	0.100035	23794
12512	21/01/2016 23:00	11887	25/01/2016 23:00	2878	905949	A549	100	231	Glo	4	832	L39-D6-S	1259	Talazoparib	0.0316367	18347
12512	21/01/2016 23:00	11887	25/01/2016 23:00	2878	905949	A549	100	231	Glo	4	833	L39-D7-S	1259	Talazoparib	0.0100053	23699
12512	21/01/2016 23:00	11887	25/01/2016 23:00	2878	905949	A549	100	231	Glo	4	848	NC-1	4000	DMSO	NA	28860
12512	21/01/2016 23:00	11887	25/01/2016 23:00	2878	905949	A549	100	231	Glo	4	856	NC-1	4000	DMSO	NA	32205
12512	21/01/2016 23:00	11887	25/01/2016 23:00	2878	905949	A549	100	231	Glo	4	857	NC-1	4000	DMSO	NA	32014
12512	21/01/2016 23:00	11887	25/01/2016 23:00	2878	905949	A549	100	231	Glo	4	858	NC-0	NA	NA	NA	31440
12512	21/01/2016 23:00	11887	25/01/2016 23:00	2878	905949	A549	100	231	Glo	4	859	NC-1	4000	DMSO	NA	30676
12512	21/01/2016 23:00	11887	25/01/2016 23:00	2878	905949	A549	100	231	Glo	4	860	PC2-D1-S	1034	Staurosporine	2	6688
12512	21/01/2016 23:00	11887	25/01/2016 23:00	2878	905949	A549	100	231	Glo	4	861	PC1-D1-S	1862	MG-132	4	8408
12512	21/01/2016 23:00	11887	25/01/2016 23:00	2878	905949	A549	100	231	Glo	4	862	NC-1	4000	DMSO	NA	29242
12512	21/01/2016 23:00	11887	25/01/2016 23:00	2878	905949	A549	100	231	Glo	4	863	UN-USED	NA	NA	NA	29146
12512	21/01/2016 23:00	11887	25/01/2016 23:00	2878	905949	A549	100	231	Glo	4	864	UN-USED	NA	NA	NA	9746
12512	21/01/2016 23:00	11887	25/01/2016 23:00	2878	905949	A549	100	231	Glo	4	865	B	NA	NA	NA	573
12512	21/01/2016 23:00	11887	25/01/2016 23:00	2878	905949	A549	100	231	Glo	4	866	UN-USED	NA	NA	NA	38991
12512	21/01/2016 23:00	11887	25/01/2016 23:00	2878	905949	A549	100	231	Glo	4	867	L15-D1-S	1049	PD-173074	2	33734
12512	21/01/2016 23:00	11887	25/01/2016 23:00	2878	905949	A549	100	231	Glo	4	868	L15-D2-S	1049	PD-173074	0.632511	32205
12512	21/01/2016 23:00	11887	25/01/2016 23:00	2878	905949	A549	100	231	Glo	4	869	L15-D3-S	1049	PD-173074	0.200035	30771
12512	21/01/2016 23:00	11887	25/01/2016 23:00	2878	905949	A549	100	231	Glo	4	870	L15-D4-S	1049	PD-173074	0.0632622	28764
12512	21/01/2016 23:00	11887	25/01/2016 23:00	2878	905949	A549	100	231	Glo	4	871	L15-D5-S	1049	PD-173074	0.020007	31536
12512	21/01/2016 23:00	11887	25/01/2016 23:00	2878	905949	A549	100	231	Glo	4	872	L15-D6-S	1049	PD-173074	0.00632733	27139
12512	21/01/2016 23:00	11887	25/01/2016 23:00	2878	905949	A549	100	231	Glo	4	873	L15-D7-S	1049	PD-173074	0.00200105	29911
12512	21/01/2016 23:00	11887	25/01/2016 23:00	2878	905949	A549	100	231	Glo	4	874	NC-1	4000	DMSO	NA	32874
12512	21/01/2016 23:00	11887	25/01/2016 23:00	2878	905949	A549	100	231	Glo	4	875	L40-D1-S	1372	Trametinib	1	13569
12512	21/01/2016 23:00	11887	25/01/2016 23:00	2878	905949	A549	100	231	Glo	4	876	L40-D2-S	1372	Trametinib	0.316256	12231
12512	21/01/2016 23:00	11887	25/01/2016 23:00	2878	905949	A549	100	231	Glo	4	877	L40-D3-S	1372	Trametinib	0.100018	9456
12512	21/01/2016 23:00	11887	25/01/2016 23:00	2878	905949	A549	100	231	Glo	4	878	L40-D4-S	1372	Trametinib	0.0316311	11180
12512	21/01/2016 23:00	11887	25/01/2016 23:00	2878	905949	A549	100	231	Glo	4	879	L40-D5-S	1372	Trametinib	0.0100035	20545
12512	21/01/2016 23:00	11887	25/01/2016 23:00	2878	905949	A549	100	231	Glo	4	880	L40-D6-S	1372	Trametinib	0.00316367	20354
12512	21/01/2016 23:00	11887	25/01/2016 23:00	2878	905949	A549	100	231	Glo	4	881	L40-D7-S	1372	Trametinib	0.00100053	21405
12512	21/01/2016 23:00	11887	25/01/2016 23:00	2878	905949	A549	100	231	Glo	4	896	NC-1	4000	DMSO	NA	6880
12512	21/01/2016 23:00	11887	25/01/2016 23:00	2878	905949	A549	100	231	Glo	4	911	UN-USED	NA	NA	NA	29337
12512	21/01/2016 23:00	11887	25/01/2016 23:00	2878	905949	A549	100	231	Glo	4	912	UN-USED	NA	NA	NA	8313
12512	21/01/2016 23:00	11887	25/01/2016 23:00	2878	905949	A549	100	231	Glo	4	913	B	NA	NA	NA	287
12512	21/01/2016 23:00	11887	25/01/2016 23:00	2878	905949	A549	100	231	Glo	4	914	UN-USED	NA	NA	NA	30006
12512	21/01/2016 23:00	11887	25/01/2016 23:00	2878	905949	A549	100	231	Glo	4	915	L16-D1-S	1053	MK-2206	10	15575
12512	21/01/2016 23:00	11887	25/01/2016 23:00	2878	905949	A549	100	231	Glo	4	916	L16-D2-S	1053	MK-2206	3.16256	21596
12512	21/01/2016 23:00	11887	25/01/2016 23:00	2878	905949	A549	100	231	Glo	4	917	L16-D3-S	1053	MK-2206	1.00018	25228
12512	21/01/2016 23:00	11887	25/01/2016 23:00	2878	905949	A549	100	231	Glo	4	918	L16-D4-S	1053	MK-2206	0.316311	31822
12512	21/01/2016 23:00	11887	25/01/2016 23:00	2878	905949	A549	100	231	Glo	4	919	L16-D5-S	1053	MK-2206	0.100035	29720
12512	21/01/2016 23:00	11887	25/01/2016 23:00	2878	905949	A549	100	231	Glo	4	920	L16-D6-S	1053	MK-2206	0.0316367	28477
12512	21/01/2016 23:00	11887	25/01/2016 23:00	2878	905949	A549	100	231	Glo	4	921	L16-D7-S	1053	MK-2206	0.0100053	21883
12512	21/01/2016 23:00	11887	25/01/2016 23:00	2878	905949	A549	100	231	Glo	4	922	NC-1	4000	DMSO	NA	28270
12512	21/01/2016 23:00	11887	25/01/2016 23:00	2878	905949	A549	100	231	Glo	4	923	L41-D1-S	1495	Olaparib	10	22552
12512	21/01/2016 23:00	11887	25/01/2016 23:00	2878	905949	A549	100	231	Glo	4	924	L41-D2-S	1495	Olaparib	3.16256	24081
12512	21/01/2016 23:00	11887	25/01/2016 23:00	2878	905949	A549	100	231	Glo	4	925	L41-D3-S	1495	Olaparib	1.00018	24654
12512	21/01/2016 23:00	11887	25/01/2016 23:00	2878	905949	A549	100	231	Glo	4	926	L41-D4-S	1495	Olaparib	0.316311	27904
12512	21/01/2016 23:00	11887	25/01/2016 23:00	2878	905949	A549	100	231	Glo	4	927	L41-D5-S	1495	Olaparib	0.100035	26470
12512	21/01/2016 23:00	11887	25/01/2016 23:00	2878	905949	A549	100	231	Glo	4	928	L41-D6-S	1495	Olaparib	0.0316367	24941
12512	21/01/2016 23:00	11887	25/01/2016 23:00	2878	905949	A549	100	231	Glo	4	929	L41-D7-S	1495	Olaparib	0.0100053	28668
12512	21/01/2016 23:00	11887	25/01/2016 23:00	2878	905949	A549	100	231	Glo	4	937	NC-1	4000	DMSO	NA	32205
12512	21/01/2016 23:00	11887	25/01/2016 23:00	2878	905949	A549	100	231	Glo	4	959	UN-USED	NA	NA	NA	33256
12512	21/01/2016 23:00	11887	25/01/2016 23:00	2878	905949	A549	100	231	Glo	4	960	UN-USED	NA	NA	NA	5733
12512	21/01/2016 23:00	11887	25/01/2016 23:00	2878	905949	A549	100	231	Glo	4	961	B	NA	NA	NA	96
12512	21/01/2016 23:00	11887	25/01/2016 23:00	2878	905949	A549	100	231	Glo	4	962	UN-USED	NA	NA	NA	32109
12512	21/01/2016 23:00	11887	25/01/2016 23:00	2878	905949	A549	100	231	Glo	4	963	L17-D1-S	1054	PD-0332991	10	18729
12512	21/01/2016 23:00	11887	25/01/2016 23:00	2878	905949	A549	100	231	Glo	4	964	L17-D2-S	1054	PD-0332991	3.16256	14524
12512	21/01/2016 23:00	11887	25/01/2016 23:00	2878	905949	A549	100	231	Glo	4	965	L17-D3-S	1054	PD-0332991	1.00018	24081
12512	21/01/2016 23:00	11887	25/01/2016 23:00	2878	905949	A549	100	231	Glo	4	966	L17-D4-S	1054	PD-0332991	0.316311	19207
12512	21/01/2016 23:00	11887	25/01/2016 23:00	2878	905949	A549	100	231	Glo	4	967	L17-D5-S	1054	PD-0332991	0.100035	32778
12512	21/01/2016 23:00	11887	25/01/2016 23:00	2878	905949	A549	100	231	Glo	4	968	L17-D6-S	1054	PD-0332991	0.0316367	19908
12512	21/01/2016 23:00	11887	25/01/2016 23:00	2878	905949	A549	100	231	Glo	4	969	L17-D7-S	1054	PD-0332991	0.0100053	25897
12512	21/01/2016 23:00	11887	25/01/2016 23:00	2878	905949	A549	100	231	Glo	4	970	PC2-D1-S	1034	Staurosporine	2	4969
12512	21/01/2016 23:00	11887	25/01/2016 23:00	2878	905949	A549	100	231	Glo	4	971	NC-1	4000	DMSO	NA	25897
12512	21/01/2016 23:00	11887	25/01/2016 23:00	2878	905949	A549	100	231	Glo	4	972	PC1-D1-S	1862	MG-132	4	5255
12512	21/01/2016 23:00	11887	25/01/2016 23:00	2878	905949	A549	100	231	Glo	4	973	PC1-D2-S	1862	MG-132	1	9460
12512	21/01/2016 23:00	11887	25/01/2016 23:00	2878	905949	A549	100	231	Glo	4	974	PC1-D3-S	1862	MG-132	0.25	20067
12512	21/01/2016 23:00	11887	25/01/2016 23:00	2878	905949	A549	100	231	Glo	4	975	PC1-D4-S	1862	MG-132	0.0625	36602
12512	21/01/2016 23:00	11887	25/01/2016 23:00	2878	905949	A549	100	231	Glo	4	976	PC1-D5-S	1862	MG-132	0.015625	33161
12512	21/01/2016 23:00	11887	25/01/2016 23:00	2878	905949	A549	100	231	Glo	4	977	NC-1	4000	DMSO	NA	23603
12512	21/01/2016 23:00	11887	25/01/2016 23:00	2878	905949	A549	100	231	Glo	4	985	NC-1	4000	DMSO	NA	28477
12512	21/01/2016 23:00	11887	25/01/2016 23:00	2878	905949	A549	100	231	Glo	4	1007	UN-USED	NA	NA	NA	33734
12512	21/01/2016 23:00	11887	25/01/2016 23:00	2878	905949	A549	100	231	Glo	4	1008	UN-USED	NA	NA	NA	12231
12512	21/01/2016 23:00	11887	25/01/2016 23:00	2878	905949	A549	100	231	Glo	4	1009	B	NA	NA	NA	382
12512	21/01/2016 23:00	11887	25/01/2016 23:00	2878	905949	A549	100	231	Glo	4	1010	UN-USED	NA	NA	NA	36793
12512	21/01/2016 23:00	11887	25/01/2016 23:00	2878	905949	A549	100	231	Glo	4	1011	L18-D1-S	1057	BEZ235	0.25	7166
12512	21/01/2016 23:00	11887	25/01/2016 23:00	2878	905949	A549	100	231	Glo	4	1012	L18-D2-S	1057	BEZ235	0.0790639	5064
12512	21/01/2016 23:00	11887	25/01/2016 23:00	2878	905949	A549	100	231	Glo	4	1013	L18-D3-S	1057	BEZ235	0.0250044	8886
12512	21/01/2016 23:00	11887	25/01/2016 23:00	2878	905949	A549	100	231	Glo	4	1014	L18-D4-S	1057	BEZ235	0.00790778	24559
12512	21/01/2016 23:00	11887	25/01/2016 23:00	2878	905949	A549	100	231	Glo	4	1015	L18-D5-S	1057	BEZ235	0.00250088	25419
12512	21/01/2016 23:00	11887	25/01/2016 23:00	2878	905949	A549	100	231	Glo	4	1016	L18-D6-S	1057	BEZ235	0.000790917	29624
12512	21/01/2016 23:00	11887	25/01/2016 23:00	2878	905949	A549	100	231	Glo	4	1017	L18-D7-S	1057	BEZ235	0.000250132	26183
12512	21/01/2016 23:00	11887	25/01/2016 23:00	2878	905949	A549	100	231	Glo	4	1018	NC-1	4000	DMSO	NA	26183
12512	21/01/2016 23:00	11887	25/01/2016 23:00	2878	905949	A549	100	231	Glo	4	1019	L42-D1-S	1510	Lisitinib	10	15480
12512	21/01/2016 23:00	11887	25/01/2016 23:00	2878	905949	A549	100	231	Glo	4	1020	L42-D2-S	1510	Lisitinib	3.16256	20258
12512	21/01/2016 23:00	11887	25/01/2016 23:00	2878	905949	A549	100	231	Glo	4	1021	L42-D3-S	1510	Lisitinib	1.00018	18729
12512	21/01/2016 23:00	11887	25/01/2016 23:00	2878	905949	A549	100	231	Glo	4	1022	L42-D4-S	1510	Lisitinib	0.316311	22743
12512	21/01/2016 23:00	11887	25/01/2016 23:00	2878	905949	A549	100	231	Glo	4	1023	L42-D5-S	1510	Lisitinib	0.100035	25419
12512	21/01/2016 23:00	11887	25/01/2016 23:00	2878	905949	A549	100	231	Glo	4	1024	L42-D6-S	1510	Lisitinib	0.0316367	30484
12512	21/01/2016 23:00	11887	25/01/2016 23:00	2878	905949	A549	100	231	Glo	4	1025	L42-D7-S	1510	Lisitinib	0.0100053	27235
12512	21/01/2016 23:00	11887	25/01/2016 23:00	2878	905949	A549	100	231	Glo	4	1040	NC-1	4000	DMSO	NA	23890
12512	21/01/2016 23:00	11887	25/01/2016 23:00	2878	905949	A549	100	231	Glo	4	1041	NC-1	4000	DMSO	NA	28955
12512	21/01/2016 23:00	11887	25/01/2016 23:00	2878	905949	A549	100	231	Glo	4	1042	NC-1	4000	DMSO	NA	29051
12512	21/01/2016 23:00	11887	25/01/2016 23:00	2878	905949	A549	100	231	Glo	4	1043	NC-1	4000	DMSO	NA	31153
12512	21/01/2016 23:00	11887	25/01/2016 23:00	2878	905949	A549	100	231	Glo	4	1044	PC2-D1-S	1034	Staurosporine	2	4491
12512	21/01/2016 23:00	11887	25/01/2016 23:00	2878	905949	A549	100	231	Glo	4	1045	PC1-D1-S	1862	MG-132	4	5160
12512	21/01/2016 23:00	11887	25/01/2016 23:00	2878	905949	A549	100	231	Glo	4	1046	NC-1	4000	DMSO	NA	21692
12512	21/01/2016 23:00	11887	25/01/2016 23:00	2878	905949	A549	100	231	Glo	4	1047	NC-1	4000	DMSO	NA	26852
12512	21/01/2016 23:00	11887	25/01/2016 23:00	2878	905949	A549	100	231	Glo	4	1055	UN-USED	NA	NA	NA	29529
12512	21/01/2016 23:00	11887	25/01/2016 23:00	2878	905949	A549	100	231	Glo	4	1056	UN-USED	NA	NA	NA	5773
12512	21/01/2016 23:00	11887	25/01/2016 23:00	2878	905949	A549	100	231	Glo	4	1057	B	NA	NA	NA	0
12512	21/01/2016 23:00	11887	25/01/2016 23:00	2878	905949	A549	100	231	Glo	4	1058	UN-USED	NA	NA	NA	30676
12512	21/01/2016 23:00	11887	25/01/2016 23:00	2878	905949	A549	100	231	Glo	4	1059	NC-1	4000	DMSO	NA	31536
12512	21/01/2016 23:00	11887	25/01/2016 23:00	2878	905949	A549	100	231	Glo	4	1060	L19-D1-S	1058	GDC0941	10	4204
12512	21/01/2016 23:00	11887	25/01/2016 23:00	2878	905949	A549	100	231	Glo	4	1061	L19-D2-S	1058	GDC0941	3.16256	7453
12512	21/01/2016 23:00	11887	25/01/2016 23:00	2878	905949	A549	100	231	Glo	4	1062	L19-D3-S	1058	GDC0941	1.00018	17869
12512	21/01/2016 23:00	11887	25/01/2016 23:00	2878	905949	A549	100	231	Glo	4	1063	L19-D4-S	1058	GDC0941	0.316311	24845
12512	21/01/2016 23:00	11887	25/01/2016 23:00	2878	905949	A549	100	231	Glo	4	1064	L19-D5-S	1058	GDC0941	0.100035	23221
12512	21/01/2016 23:00	11887	25/01/2016 23:00	2878	905949	A549	100	231	Glo	4	1065	L19-D6-S	1058	GDC0941	0.0316367	25897
12512	21/01/2016 23:00	11887	25/01/2016 23:00	2878	905949	A549	100	231	Glo	4	1066	L19-D7-S	1058	GDC0941	0.0100053	33925
12512	21/01/2016 23:00	11887	25/01/2016 23:00	2878	905949	A549	100	231	Glo	4	1102	NC-1	4000	DMSO	NA	33065
12512	21/01/2016 23:00	11887	25/01/2016 23:00	2878	905949	A549	100	231	Glo	4	1103	UN-USED	NA	NA	NA	34499
12512	21/01/2016 23:00	11887	25/01/2016 23:00	2878	905949	A549	100	231	Glo	4	1104	UN-USED	NA	NA	NA	6593
12512	21/01/2016 23:00	11887	25/01/2016 23:00	2878	905949	A549	100	231	Glo	4	1105	B	NA	NA	NA	299
12512	21/01/2016 23:00	11887	25/01/2016 23:00	2878	905949	A549	100	231	Glo	4	1106	UN-USED	NA	NA	NA	37079
12512	21/01/2016 23:00	11887	25/01/2016 23:00	2878	905949	A549	100	231	Glo	4	1107	NC-1	4000	DMSO	NA	25610
12512	21/01/2016 23:00	11887	25/01/2016 23:00	2878	905949	A549	100	231	Glo	4	1150	NC-1	4000	DMSO	NA	35932
12512	21/01/2016 23:00	11887	25/01/2016 23:00	2878	905949	A549	100	231	Glo	4	1151	UN-USED	NA	NA	NA	28860
12512	21/01/2016 23:00	11887	25/01/2016 23:00	2878	905949	A549	100	231	Glo	4	1152	UN-USED	NA	NA	NA	8408
12512	21/01/2016 23:00	11887	25/01/2016 23:00	2878	905949	A549	100	231	Glo	4	1153	B	NA	NA	NA	191
12512	21/01/2016 23:00	11887	25/01/2016 23:00	2878	905949	A549	100	231	Glo	4	1154	UN-USED	NA	NA	NA	29720
12512	21/01/2016 23:00	11887	25/01/2016 23:00	2878	905949	A549	100	231	Glo	4	1155	L21-D1-S	1060	PD-0325901	0.25	13473
12512	21/01/2016 23:00	11887	25/01/2016 23:00	2878	905949	A549	100	231	Glo	4	1156	L21-D2-S	1060	PD-0325901	0.0790639	16913
12512	21/01/2016 23:00	11887	25/01/2016 23:00	2878	905949	A549	100	231	Glo	4	1157	L21-D3-S	1060	PD-0325901	0.0250044	18633
12512	21/01/2016 23:00	11887	25/01/2016 23:00	2878	905949	A549	100	231	Glo	4	1158	L21-D4-S	1060	PD-0325901	0.00790778	17964
12512	21/01/2016 23:00	11887	25/01/2016 23:00	2878	905949	A549	100	231	Glo	4	1159	L21-D5-S	1060	PD-0325901	0.00250088	26852
12512	21/01/2016 23:00	11887	25/01/2016 23:00	2878	905949	A549	100	231	Glo	4	1160	L21-D6-S	1060	PD-0325901	0.000790917	31153
12512	21/01/2016 23:00	11887	25/01/2016 23:00	2878	905949	A549	100	231	Glo	4	1161	L21-D7-S	1060	PD-0325901	0.000250132	34116
12512	21/01/2016 23:00	11887	25/01/2016 23:00	2878	905949	A549	100	231	Glo	4	1162	NC-1	4000	DMSO	NA	25992
12512	21/01/2016 23:00	11887	25/01/2016 23:00	2878	905949	A549	100	231	Glo	4	1163	NC-1	4000	DMSO	NA	29146
12512	21/01/2016 23:00	11887	25/01/2016 23:00	2878	905949	A549	100	231	Glo	4	1164	PC1-D1-S	1862	MG-132	4	6593
12512	21/01/2016 23:00	11887	25/01/2016 23:00	2878	905949	A549	100	231	Glo	4	1165	PC2-D1-S	1034	Staurosporine	2	3535
12512	21/01/2016 23:00	11887	25/01/2016 23:00	2878	905949	A549	100	231	Glo	4	1166	NC-1	4000	DMSO	NA	29051
12512	21/01/2016 23:00	11887	25/01/2016 23:00	2878	905949	A549	100	231	Glo	4	1167	NC-1	4000	DMSO	NA	27713
12512	21/01/2016 23:00	11887	25/01/2016 23:00	2878	905949	A549	100	231	Glo	4	1168	NC-1	4000	DMSO	NA	27904
12512	21/01/2016 23:00	11887	25/01/2016 23:00	2878	905949	A549	100	231	Glo	4	1176	PC2-D5-S	1034	Staurosporine	0.0078125	11849
12512	21/01/2016 23:00	11887	25/01/2016 23:00	2878	905949	A549	100	231	Glo	4	1198	NC-1	4000	DMSO	NA	34403
12512	21/01/2016 23:00	11887	25/01/2016 23:00	2878	905949	A549	100	231	Glo	4	1199	UN-USED	NA	NA	NA	40329
12512	21/01/2016 23:00	11887	25/01/2016 23:00	2878	905949	A549	100	231	Glo	4	1200	UN-USED	NA	NA	NA	7931
12512	21/01/2016 23:00	11887	25/01/2016 23:00	2878	905949	A549	100	231	Glo	4	1201	B	NA	NA	NA	299
12512	21/01/2016 23:00	11887	25/01/2016 23:00	2878	905949	A549	100	231	Glo	4	1202	UN-USED	NA	NA	NA	44344
12512	21/01/2016 23:00	11887	25/01/2016 23:00	2878	905949	A549	100	231	Glo	4	1203	NC-1	4000	DMSO	NA	30867
12512	21/01/2016 23:00	11887	25/01/2016 23:00	2878	905949	A549	100	231	Glo	4	1204	PC2-D1-S	1034	Staurosporine	2	5733
12512	21/01/2016 23:00	11887	25/01/2016 23:00	2878	905949	A549	100	231	Glo	4	1205	PC2-D2-S	1034	Staurosporine	0.5	2771
12512	21/01/2016 23:00	11887	25/01/2016 23:00	2878	905949	A549	100	231	Glo	4	1206	PC2-D3-S	1034	Staurosporine	0.125	6497
12512	21/01/2016 23:00	11887	25/01/2016 23:00	2878	905949	A549	100	231	Glo	4	1207	PC2-D4-S	1034	Staurosporine	0.03125	6211
12512	21/01/2016 23:00	11887	25/01/2016 23:00	2878	905949	A549	100	231	Glo	4	1208	PC2-D5-S	1034	Staurosporine	0.0078125	12040
12512	21/01/2016 23:00	11887	25/01/2016 23:00	2878	905949	A549	100	231	Glo	4	1209	NC-1	4000	DMSO	NA	29433
12512	21/01/2016 23:00	11887	25/01/2016 23:00	2878	905949	A549	100	231	Glo	4	1224	PC2-D4-S	1034	Staurosporine	0.03125	9173
12512	21/01/2016 23:00	11887	25/01/2016 23:00	2878	905949	A549	100	231	Glo	4	1225	NC-0	NA	NA	NA	30006
12512	21/01/2016 23:00	11887	25/01/2016 23:00	2878	905949	A549	100	231	Glo	4	1226	NC-1	4000	DMSO	NA	29433
12512	21/01/2016 23:00	11887	25/01/2016 23:00	2878	905949	A549	100	231	Glo	4	1227	NC-1	4000	DMSO	NA	19016
12512	21/01/2016 23:00	11887	25/01/2016 23:00	2878	905949	A549	100	231	Glo	4	1228	NC-1	4000	DMSO	NA	27330
12512	21/01/2016 23:00	11887	25/01/2016 23:00	2878	905949	A549	100	231	Glo	4	1229	PC1-D1-S	1862	MG-132	4	6306
12512	21/01/2016 23:00	11887	25/01/2016 23:00	2878	905949	A549	100	231	Glo	4	1230	PC2-D1-S	1034	Staurosporine	2	3917
12512	21/01/2016 23:00	11887	25/01/2016 23:00	2878	905949	A549	100	231	Glo	4	1231	NC-1	4000	DMSO	NA	25323
12512	21/01/2016 23:00	11887	25/01/2016 23:00	2878	905949	A549	100	231	Glo	4	1246	NC-1	4000	DMSO	NA	38609
12512	21/01/2016 23:00	11887	25/01/2016 23:00	2878	905949	A549	100	231	Glo	4	1247	UN-USED	NA	NA	NA	34403
12512	21/01/2016 23:00	11887	25/01/2016 23:00	2878	905949	A549	100	231	Glo	4	1248	UN-USED	NA	NA	NA	13664
12512	21/01/2016 23:00	11887	25/01/2016 23:00	2878	905949	A549	100	231	Glo	4	1249	B	NA	NA	NA	191
12512	21/01/2016 23:00	11887	25/01/2016 23:00	2878	905949	A549	100	231	Glo	4	1250	UN-USED	NA	NA	NA	39182
12512	21/01/2016 23:00	11887	25/01/2016 23:00	2878	905949	A549	100	231	Glo	4	1272	PC2-D3-S	1034	Staurosporine	0.125	7835
12512	21/01/2016 23:00	11887	25/01/2016 23:00	2878	905949	A549	100	231	Glo	4	1273	NC-1	4000	DMSO	NA	33161
12512	21/01/2016 23:00	11887	25/01/2016 23:00	2878	905949	A549	100	231	Glo	4	1295	UN-USED	NA	NA	NA	35550
12512	21/01/2016 23:00	11887	25/01/2016 23:00	2878	905949	A549	100	231	Glo	4	1296	UN-USED	NA	NA	NA	6020
12512	21/01/2016 23:00	11887	25/01/2016 23:00	2878	905949	A549	100	231	Glo	4	1297	B	NA	NA	NA	96
12512	21/01/2016 23:00	11887	25/01/2016 23:00	2878	905949	A549	100	231	Glo	4	1298	UN-USED	NA	NA	NA	45778
12512	21/01/2016 23:00	11887	25/01/2016 23:00	2878	905949	A549	100	231	Glo	4	1320	PC2-D2-S	1034	Staurosporine	0.5	3153
12512	21/01/2016 23:00	11887	25/01/2016 23:00	2878	905949	A549	100	231	Glo	4	1321	NC-1	4000	DMSO	NA	29529
12512	21/01/2016 23:00	11887	25/01/2016 23:00	2878	905949	A549	100	231	Glo	4	1343	UN-USED	NA	NA	NA	35932
12512	21/01/2016 23:00	11887	25/01/2016 23:00	2878	905949	A549	100	231	Glo	4	1344	UN-USED	NA	NA	NA	7548
12512	21/01/2016 23:00	11887	25/01/2016 23:00	2878	905949	A549	100	231	Glo	4	1345	B	NA	NA	NA	96
12512	21/01/2016 23:00	11887	25/01/2016 23:00	2878	905949	A549	100	231	Glo	4	1346	UN-USED	NA	NA	NA	42432
12512	21/01/2016 23:00	11887	25/01/2016 23:00	2878	905949	A549	100	231	Glo	4	1361	NC-1	4000	DMSO	NA	36219
12512	21/01/2016 23:00	11887	25/01/2016 23:00	2878	905949	A549	100	231	Glo	4	1362	NC-1	4000	DMSO	NA	31727
12512	21/01/2016 23:00	11887	25/01/2016 23:00	2878	905949	A549	100	231	Glo	4	1363	PC2-D1-S	1034	Staurosporine	2	4479
12512	21/01/2016 23:00	11887	25/01/2016 23:00	2878	905949	A549	100	231	Glo	4	1364	PC1-D1-S	1862	MG-132	4	6497
12512	21/01/2016 23:00	11887	25/01/2016 23:00	2878	905949	A549	100	231	Glo	4	1365	NC-1	4000	DMSO	NA	31440
12512	21/01/2016 23:00	11887	25/01/2016 23:00	2878	905949	A549	100	231	Glo	4	1366	NC-1	4000	DMSO	NA	36410
12512	21/01/2016 23:00	11887	25/01/2016 23:00	2878	905949	A549	100	231	Glo	4	1367	NC-1	4000	DMSO	NA	33830
12512	21/01/2016 23:00	11887	25/01/2016 23:00	2878	905949	A549	100	231	Glo	4	1368	PC2-D1-S	1034	Staurosporine	2	5255
12512	21/01/2016 23:00	11887	25/01/2016 23:00	2878	905949	A549	100	231	Glo	4	1376	NC-1	4000	DMSO	NA	35072
12512	21/01/2016 23:00	11887	25/01/2016 23:00	2878	905949	A549	100	231	Glo	4	1391	UN-USED	NA	NA	NA	36697
12512	21/01/2016 23:00	11887	25/01/2016 23:00	2878	905949	A549	100	231	Glo	4	1392	UN-USED	NA	NA	NA	4013
12512	21/01/2016 23:00	11887	25/01/2016 23:00	2878	905949	A549	100	231	Glo	4	1393	B	NA	NA	NA	96
12512	21/01/2016 23:00	11887	25/01/2016 23:00	2878	905949	A549	100	231	Glo	4	1394	UN-USED	NA	NA	NA	26566
12512	21/01/2016 23:00	11887	25/01/2016 23:00	2878	905949	A549	100	231	Glo	4	1395	NC-1	4000	DMSO	NA	38704
12512	21/01/2016 23:00	11887	25/01/2016 23:00	2878	905949	A549	100	231	Glo	4	1396	NC-1	4000	DMSO	NA	26279
12512	21/01/2016 23:00	11887	25/01/2016 23:00	2878	905949	A549	100	231	Glo	4	1397	NC-1	4000	DMSO	NA	40517
12512	21/01/2016 23:00	11887	25/01/2016 23:00	2878	905949	A549	100	231	Glo	4	1398	NC-1	4000	DMSO	NA	30102
12512	21/01/2016 23:00	11887	25/01/2016 23:00	2878	905949	A549	100	231	Glo	4	1399	PC1-D1-S	1862	MG-132	4	6768
12512	21/01/2016 23:00	11887	25/01/2016 23:00	2878	905949	A549	100	231	Glo	4	1400	PC2-D1-S	1034	Staurosporine	2	3917
12512	21/01/2016 23:00	11887	25/01/2016 23:00	2878	905949	A549	100	231	Glo	4	1401	NC-1	4000	DMSO	NA	35932
12512	21/01/2016 23:00	11887	25/01/2016 23:00	2878	905949	A549	100	231	Glo	4	1416	NC-1	4000	DMSO	NA	34977
12512	21/01/2016 23:00	11887	25/01/2016 23:00	2878	905949	A549	100	231	Glo	4	1424	NC-1	4000	DMSO	NA	35646
12512	21/01/2016 23:00	11887	25/01/2016 23:00	2878	905949	A549	100	231	Glo	4	1432	NC-1	4000	DMSO	NA	34308
12512	21/01/2016 23:00	11887	25/01/2016 23:00	2878	905949	A549	100	231	Glo	4	1433	NC-1	4000	DMSO	NA	37749
12512	21/01/2016 23:00	11887	25/01/2016 23:00	2878	905949	A549	100	231	Glo	4	1434	NC-1	4000	DMSO	NA	34403
12512	21/01/2016 23:00	11887	25/01/2016 23:00	2878	905949	A549	100	231	Glo	4	1435	PC2-D1-S	1034	Staurosporine	2	3249
12512	21/01/2016 23:00	11887	25/01/2016 23:00	2878	905949	A549	100	231	Glo	4	1436	PC1-D1-S	1862	MG-132	4	7262
12512	21/01/2016 23:00	11887	25/01/2016 23:00	2878	905949	A549	100	231	Glo	4	1437	NC-1	4000	DMSO	NA	35550
12512	21/01/2016 23:00	11887	25/01/2016 23:00	2878	905949	A549	100	231	Glo	4	1438	NC-1	4000	DMSO	NA	38418
12512	21/01/2016 23:00	11887	25/01/2016 23:00	2878	905949	A549	100	231	Glo	4	1439	UN-USED	NA	NA	NA	30389
12512	21/01/2016 23:00	11887	25/01/2016 23:00	2878	905949	A549	100	231	Glo	4	1440	UN-USED	NA	NA	NA	1433
12512	21/01/2016 23:00	11887	25/01/2016 23:00	2878	905949	A549	100	231	Glo	4	1441	UN-USED	NA	NA	NA	96
12512	21/01/2016 23:00	11887	25/01/2016 23:00	2878	905949	A549	100	231	Glo	4	1442	UN-USED	NA	NA	NA	13091
12512	21/01/2016 23:00	11887	25/01/2016 23:00	2878	905949	A549	100	231	Glo	4	1443	UN-USED	NA	NA	NA	38035
12512	21/01/2016 23:00	11887	25/01/2016 23:00	2878	905949	A549	100	231	Glo	4	1444	UN-USED	NA	NA	NA	36602
12512	21/01/2016 23:00	11887	25/01/2016 23:00	2878	905949	A549	100	231	Glo	4	1445	UN-USED	NA	NA	NA	45300
12512	21/01/2016 23:00	11887	25/01/2016 23:00	2878	905949	A549	100	231	Glo	4	1446	UN-USED	NA	NA	NA	46256
12512	21/01/2016 23:00	11887	25/01/2016 23:00	2878	905949	A549	100	231	Glo	4	1447	UN-USED	NA	NA	NA	29664
12512	21/01/2016 23:00	11887	25/01/2016 23:00	2878	905949	A549	100	231	Glo	4	1448	UN-USED	NA	NA	NA	34021
12512	21/01/2016 23:00	11887	25/01/2016 23:00	2878	905949	A549	100	231	Glo	4	1449	UN-USED	NA	NA	NA	37462
12512	21/01/2016 23:00	11887	25/01/2016 23:00	2878	905949	A549	100	231	Glo	4	1450	UN-USED	NA	NA	NA	40043
12512	21/01/2016 23:00	11887	25/01/2016 23:00	2878	905949	A549	100	231	Glo	4	1451	UN-USED	NA	NA	NA	39087
12512	21/01/2016 23:00	11887	25/01/2016 23:00	2878	905949	A549	100	231	Glo	4	1452	UN-USED	NA	NA	NA	44535
12512	21/01/2016 23:00	11887	25/01/2016 23:00	2878	905949	A549	100	231	Glo	4	1453	UN-USED	NA	NA	NA	35550
12512	21/01/2016 23:00	11887	25/01/2016 23:00	2878	905949	A549	100	231	Glo	4	1454	UN-USED	NA	NA	NA	43388
12512	21/01/2016 23:00	11887	25/01/2016 23:00	2878	905949	A549	100	231	Glo	4	1455	UN-USED	NA	NA	NA	34881
12512	21/01/2016 23:00	11887	25/01/2016 23:00	2878	905949	A549	100	231	Glo	4	1456	UN-USED	NA	NA	NA	37079
12512	21/01/2016 23:00	11887	25/01/2016 23:00	2878	905949	A549	100	231	Glo	4	1457	UN-USED	NA	NA	NA	40999
12512	21/01/2016 23:00	11887	25/01/2016 23:00	2878	905949	A549	100	231	Glo	4	1458	UN-USED	NA	NA	NA	23890
12512	21/01/2016 23:00	11887	25/01/2016 23:00	2878	905949	A549	100	231	Glo	4	1459	UN-USED	NA	NA	NA	36315
12512	21/01/2016 23:00	11887	25/01/2016 23:00	2878	905949	A549	100	231	Glo	4	1460	UN-USED	NA	NA	NA	34499
12512	21/01/2016 23:00	11887	25/01/2016 23:00	2878	905949	A549	100	231	Glo	4	1461	UN-USED	NA	NA	NA	33734
12512	21/01/2016 23:00	11887	25/01/2016 23:00	2878	905949	A549	100	231	Glo	4	1462	UN-USED	NA	NA	NA	39660
12512	21/01/2016 23:00	11887	25/01/2016 23:00	2878	905949	A549	100	231	Glo	4	1463	UN-USED	NA	NA	NA	46638
12512	21/01/2016 23:00	11887	25/01/2016 23:00	2878	905949	A549	100	231	Glo	4	1464	UN-USED	NA	NA	NA	44918
12512	21/01/2016 23:00	11887	25/01/2016 23:00	2878	905949	A549	100	231	Glo	4	1465	UN-USED	NA	NA	NA	45109
12512	21/01/2016 23:00	11887	25/01/2016 23:00	2878	905949	A549	100	231	Glo	4	1466	UN-USED	NA	NA	NA	43771
12512	21/01/2016 23:00	11887	25/01/2016 23:00	2878	905949	A549	100	231	Glo	4	1467	UN-USED	NA	NA	NA	47308
12512	21/01/2016 23:00	11887	25/01/2016 23:00	2878	905949	A549	100	231	Glo	4	1468	UN-USED	NA	NA	NA	35932
12512	21/01/2016 23:00	11887	25/01/2016 23:00	2878	905949	A549	100	231	Glo	4	1469	UN-USED	NA	NA	NA	39756
12512	21/01/2016 23:00	11887	25/01/2016 23:00	2878	905949	A549	100	231	Glo	4	1470	UN-USED	NA	NA	NA	36793
12512	21/01/2016 23:00	11887	25/01/2016 23:00	2878	905949	A549	100	231	Glo	4	1471	UN-USED	NA	NA	NA	35741
12512	21/01/2016 23:00	11887	25/01/2016 23:00	2878	905949	A549	100	231	Glo	4	1472	UN-USED	NA	NA	NA	40329
12512	21/01/2016 23:00	11887	25/01/2016 23:00	2878	905949	A549	100	231	Glo	4	1473	UN-USED	NA	NA	NA	39565
12512	21/01/2016 23:00	11887	25/01/2016 23:00	2878	905949	A549	100	231	Glo	4	1474	UN-USED	NA	NA	NA	45778
12512	21/01/2016 23:00	11887	25/01/2016 23:00	2878	905949	A549	100	231	Glo	4	1475	UN-USED	NA	NA	NA	36602
12512	21/01/2016 23:00	11887	25/01/2016 23:00	2878	905949	A549	100	231	Glo	4	1476	UN-USED	NA	NA	NA	43675
12512	21/01/2016 23:00	11887	25/01/2016 23:00	2878	905949	A549	100	231	Glo	4	1477	UN-USED	NA	NA	NA	41114
12512	21/01/2016 23:00	11887	25/01/2016 23:00	2878	905949	A549	100	231	Glo	4	1478	UN-USED	NA	NA	NA	34785
12512	21/01/2016 23:00	11887	25/01/2016 23:00	2878	905949	A549	100	231	Glo	4	1479	UN-USED	NA	NA	NA	41381
12512	21/01/2016 23:00	11887	25/01/2016 23:00	2878	905949	A549	100	231	Glo	4	1480	UN-USED	NA	NA	NA	43388
12512	21/01/2016 23:00	11887	25/01/2016 23:00	2878	905949	A549	100	231	Glo	4	1481	UN-USED	NA	NA	NA	42624
12512	21/01/2016 23:00	11887	25/01/2016 23:00	2878	905949	A549	100	231	Glo	4	1482	UN-USED	NA	NA	NA	37271
12512	21/01/2016 23:00	11887	25/01/2016 23:00	2878	905949	A549	100	231	Glo	4	1483	UN-USED	NA	NA	NA	30867
12512	21/01/2016 23:00	11887	25/01/2016 23:00	2878	905949	A549	100	231	Glo	4	1484	UN-USED	NA	NA	NA	34690
12512	21/01/2016 23:00	11887	25/01/2016 23:00	2878	905949	A549	100	231	Glo	4	1485	UN-USED	NA	NA	NA	36697
12512	21/01/2016 23:00	11887	25/01/2016 23:00	2878	905949	A549	100	231	Glo	4	1486	UN-USED	NA	NA	NA	24750
12512	21/01/2016 23:00	11887	25/01/2016 23:00	2878	905949	A549	100	231	Glo	4	1487	UN-USED	NA	NA	NA	12995
12512	21/01/2016 23:00	11887	25/01/2016 23:00	2878	905949	A549	100	231	Glo	4	1488	UN-USED	NA	NA	NA	100
[truncated: 56,654 more rows]
